# Supplementary material for: RNA m6A demethylase ALKBH5 regulates the development of γδ T cells
Source: Research Square preprint supplement (doi:10.21203/rs.3.rs-79739/v1), 2020-12-01
Supplement: Supplementary file 5 [file 533ca7c35ee963d350bb11d7.xlsx]

## Sheet: Sheet 1
gene_name	WT1	WT2	WT3	KO1	KO2	KO3	baseMean	log2FoldChange (WT vs KO)	lfcSE	stat	pvalue	padj
Jagged1	203	216	249	212	145	215	206.088	0.358233	0.276314	1.29647	0.194813	0.999958
Jagged2	331	561	460	418	568	411	456.78	0.0535754	0.20415	0.262432	0.792989	0.999958
Notch1	2782	2838	2825	2901	3301	3138	2952.56	-0.0257918	0.11984	-0.215218	0.829597	0.999958
Notch2	691	1050	907	871	893	1080	908.312	0.000834651	0.155004	0.0053847	0.995704	0.999958
Notch3	148	118	133	160	217	245	168.462	-0.508482	0.324809	-1.56548	0.11747	0.999958
Notch4	24	11	21	15	19	11	17.0212	0.409233	0.919631	0.444998	0.656321	0.999958
Hey1	104	100	44	178	50	31	83.6685	0.343379	0.466081	0.736736	0.461283	0.999958
Hes1	669	279	335	430	269	359	391.559	0.319518	0.234469	1.36273	0.172967	0.999958
Fabp7	64	29	22	25	20	33	32.3866	0.561263	0.694912	0.807675	0.419278	0.999958
Gzmb	404	283	248	557	240	291	334.163	-0.0380691	0.227823	-0.167099	0.867292	0.999958
Cdkn1a	56	37	64	64	25	13	43.5099	0.955014	0.646952	1.47617	0.139897	0.999958
