# Supplementary material for: RNA m6A demethylase ALKBH5 regulates the development of γδ T cells
Source: Research Square preprint supplement (doi:10.21203/rs.3.rs-79739/v1), 2020-12-01
Supplement: Supplementary file 6 [file 71ce0465b2ec89bc8323cf07.csv]

	baseMean	log2FoldChange	lfcSE	stat	pvalue	padj	gene_type	gene_name	lgG control_1 reads	lgG control_2 reads	anti_m6A_1 reads	anti_m6A_2 reads	lgG control_1 fpkm	lgG control_2 fpkm	anti_m6A_1 fpkm	anti_m6A_2 fpkm	label
ENSMUSG00000091095	1488.589777	-1.813596623	0.158201189	-11.46386218	2.00E-30	1.76E-27	protein_coding	Gm17305	702.6156026	616.5745501	2452.309342	2182.859616	-2696936.243	-2453502.05	-9596959.033	-8364530.921	NA
ENSMUSG00000080374	595.1594912	-1.672549622	0.193672225	-8.635980849	5.82E-18	2.56E-15	miRNA	Gm22953	263.6105806	304.8888326	994.3465317	817.79202	10113.95587	11453.99873	37418.85391	31903.88177	NA
ENSMUSG00000098178	587.2652031	-1.530800186	0.192232496	-7.963274759	1.68E-15	4.91E-13	lincRNA	Gm42418	288.5186669	315.5696516	962.5557012	782.4167927	-1105578.798	-1211289.968	-3830246.295	-3061939.12	NA
ENSMUSG00000038491	123.1345282	-2.588643718	0.387378399	-6.682467906	2.35E-11	5.16E-09	antisense	Cdk19os	37.36212953	33.01344048	281.7020814	140.4604614	270.2668283	233.8348869	1998.69111	1033.136384	NA
ENSMUSG00000028461	630.8423493	1.242493887	0.192210858	6.464223185	1.02E-10	1.79E-08	protein_coding	Ccdc107	835.4587298	938.9410865	421.2285041	327.7410767	3915.587328	4308.912278	1936.351366	1561.871252	NA
ENSMUSG00000090054	361.9548731	1.248223414	0.208145013	5.996893204	2.01E-09	2.95E-07	antisense	Gm15629	491.9347055	527.2440641	227.8342852	200.8064375	-1957529.399	-2063336.626	-873041.4499	-770780.1494	NA
ENSMUSG00000091623	651.1020451	-2.364847763	0.402928704	-5.869146923	4.38E-09	5.50E-07	antisense	Gm17092	181.621463	241.7749023	1359.058004	821.9538114	-697140.0924	-962081.9063	-5318588.387	-3149656.543	NA
ENSMUSG00000109274	89.08080456	-2.184407217	0.373925449	-5.841825478	5.16E-09	5.67E-07	TEC	RP23-419K14.8	34.24861874	30.10048985	159.8372311	132.1368785	-131460.7031	-119777.2654	-625512.9942	-506337.1911	NA
ENSMUSG00000073145	247.8661896	-1.341931338	0.240704313	-5.575019916	2.48E-08	2.42E-06	antisense	Gm12000	129.7296164	150.5024492	329.3883271	381.8443656	430.9751525	489.5691711	1073.286839	1289.858074	NA
ENSMUSG00000019437	2543.270933	0.771429623	0.140237721	5.500871061	3.78E-08	3.02E-06	protein_coding	Tlcd1	3323.153854	3091.611602	1826.206596	1932.111681	15668.61988	14273.24172	8445.487136	9263.070389	NA
ENSMUSG00000097817	63.69620114	-2.944746703	0.533814374	-5.516424524	3.46E-08	3.02E-06	antisense	Gm26810	20.75673863	8.738851891	154.5387594	70.75045465	-81230.19674	-33486.5313	-593185.2062	-281533.491	NA
ENSMUSG00000061536	144.6743592	-1.668062012	0.306479367	-5.442656803	5.25E-08	3.85E-06	protein_coding	Sec22c	67.45940054	70.88179867	185.4465112	254.9097263	96.43672445	101.5013475	275.2983994	372.159392	NA
ENSMUSG00000060636	97.80468269	1.921672709	0.358319673	5.363012002	8.18E-08	5.45E-06	protein_coding	Rpl35a	175.3944414	133.995729	37.08930225	44.73925809	1355.218829	1018.221153	275.9670422	333.452854	NA
ENSMUSG00000075576	583.3280563	-0.992127645	0.18536635	-5.352253238	8.69E-08	5.45E-06	antisense	Gm12359	378.81048	401.987187	839.8077723	712.7067859	1073.632645	1120.478406	2292.07364	1948.483247	NA
ENSMUSG00000064330	825.5432147	0.867485558	0.166886724	5.198050133	2.01E-07	1.18E-05	protein_coding	Pde6h	1128.128744	1004.967967	580.1826566	588.8934902	8103.072616	7099.059937	4013.014808	4080.185224	NA
ENSMUSG00000097347	510.4702134	0.962561667	0.18690375	5.150039336	2.60E-07	1.43E-05	lincRNA	Gm17275	653.8372668	695.2242171	327.6221699	365.1971998	-2558751.197	-2664039.602	-1257552.637	-1453209.637	NA
ENSMUSG00000085009	111.699621	1.79160377	0.351319889	5.09963662	3.40E-07	1.76E-05	antisense	Gm12977	202.3782016	144.676548	59.16626787	40.57746664	-805312.7274	-566182.6102	-226720.0664	-155753.5017	NA
ENSMUSG00000019464	1294.601306	-0.764243869	0.157744651	-4.844816374	1.27E-06	6.19E-05	protein_coding	Ptger1	961.0369985	958.3607574	1755.560306	1503.447161	1769.240769	1829.042485	3295.096076	2763.10822	NA
ENSMUSG00000022443	480.3705577	-1.01349231	0.210243572	-4.820562643	1.43E-06	6.62E-05	protein_coding	Myh9	347.675372	289.3530959	726.7737083	557.6800543	277.4968175	231.3392469	602.3769324	454.5815389	NA
ENSMUSG00000049517	279.193073	1.253241436	0.264727328	4.734084101	2.20E-06	9.67E-05	protein_coding	Rps23	485.7076839	301.0048985	156.3049166	173.754793	3663.760251	2274.378498	1224.361761	1338.540357	NA
ENSMUSG00000068601	89.49861732	-1.874320556	0.398838909	-4.699442594	2.61E-06	0.000106446	antisense	Gm10244	30.09727101	46.60721008	173.0834105	108.2065777	138.9520029	215.5400128	829.8090791	510.192368	NA
ENSMUSG00000100259	693.8020785	-0.879495488	0.18732022	-4.695144426	2.66E-06	0.000106446	unprocessed_pseudogene	Gm29236	480.5184992	497.1435742	1012.008104	785.5381362	-1844433.502	-1978256.771	-3960430.339	-3010114.798	NA
ENSMUSG00000100280	424.6588221	0.921008059	0.196849628	4.678739135	2.89E-06	0.000110312	processed_transcript	Gm28417	574.96166	536.9538995	309.9605974	276.7591314	-2250076.45	-2057561.312	-1189760.042	-1101292.774	NA
ENSMUSG00000021263	451.5206471	-0.876872763	0.190380512	-4.605895605	4.11E-06	0.000150417	protein_coding	Degs2	311.3510794	325.279487	572.234949	597.2170731	935.7416829	979.2630811	1785.932433	1833.075777	NA
ENSMUSG00000064350	565.7708115	0.877581207	0.196957834	4.455680641	8.36E-06	0.000294034	Mt_tRNA	mt-Ty	746.2047537	718.5278221	342.6345065	455.7161638	42121.32155	42047.04764	19718.80417	25680.37167	NA
ENSMUSG00000048191	89.82888005	-1.674679084	0.379259939	-4.415649828	1.01E-05	0.000331666	protein_coding	Muc6	31.13510794	54.37507843	133.3448724	140.4604614	13.76249447	24.07596944	61.20799417	63.40791551	NA
ENSMUSG00000097625	64.99430011	-1.925980791	0.43641853	-4.413150818	1.02E-05	0.000331666	lincRNA	Gm26561	24.90808635	29.1295063	82.12631212	123.8132956	-97476.23609	-111621.771	-315235.5667	-492683.6092	NA
ENSMUSG00000000568	47.03876691	-2.124516487	0.492015706	-4.317985101	1.57E-05	0.000487793	protein_coding	Hnrnpd	17.64322783	17.47770378	81.2432335	71.79090252	40.11977512	41.20147489	188.3532621	162.97191	NA
ENSMUSG00000001924	69.77335779	-1.87324809	0.434825395	-4.308046661	1.65E-05	0.000487793	protein_coding	Uba1	24.90808635	34.95540756	135.9941082	83.23582901	25.45736121	34.98201233	136.3288016	86.50192524	NA
ENSMUSG00000020818	109.5589022	1.498262349	0.347974377	4.305668606	1.66E-05	0.000487793	protein_coding	Mfsd11	190.9619954	133.0247454	65.34781825	48.90104954	265.5083263	181.8951819	87.4937937	65.58453457	NA
ENSMUSG00000034595	88.23920025	-1.499304355	0.356031492	-4.21115657	2.54E-05	0.000720402	protein_coding	Ppp1r18	44.62698805	47.57819363	130.6956365	130.0559828	76.01388056	84.01391393	226.9665803	221.1508219	NA
ENSMUSG00000026238	78.06281962	-1.610376414	0.383355165	-4.200742712	2.66E-05	0.000730781	protein_coding	Ptma	35.28645567	41.75229237	128.0464006	107.1661298	113.1531836	138.7992135	418.6312197	343.0671869	NA
ENSMUSG00000015467	61.97721862	-1.930087892	0.466703074	-4.135579988	3.54E-05	0.000943085	protein_coding	Egfl8	31.13510794	20.39065441	71.52936862	124.8537435	112.0707967	72.18231487	247.9370499	433.5065976	NA
ENSMUSG00000076258	254.7598564	1.131199995	0.275196584	4.110516122	3.95E-05	0.001020611	miRNA	Gm23935	367.3942737	333.0473554	203.1080837	115.4897127	12798.3942	11621.60724	7347.428256	4108.743258	NA
ENSMUSG00000097664	128.4387109	1.196117457	0.301306905	3.969764511	7.19E-05	0.001806815	lincRNA	Gm26765	169.1674198	188.3708074	75.06168312	81.15493328	-673158.844	-737177.3582	-287629.935	-311507.0034	NA
ENSMUSG00000041774	213.5535847	0.961772746	0.243921988	3.94295223	8.05E-05	0.001965168	protein_coding	Ydjc	277.1024607	287.4111289	149.2402876	140.4604614	618.0340489	664.5436931	339.3623007	312.7440135	NA
ENSMUSG00000043633	49.48632646	-1.897297508	0.486288698	-3.901586683	9.56E-05	0.002270296	protein_coding	Fam221b	16.6053909	25.24557213	87.42478387	68.66955893	35.94939799	54.74756917	196.5450595	151.8271291	NA
ENSMUSG00000075595	217.8622443	-0.939457881	0.242687197	-3.871064858	0.000108361	0.00250656	protein_coding	Zfp652	143.2214965	155.3573669	282.58516	290.2849537	83.74341909	90.99372378	171.5840355	173.3443179	NA
ENSMUSG00000076609	66.68054262	-1.9839378	0.516837229	-3.838612405	0.000123732	0.002770745	IG_C_gene	Igkc	17.64322783	35.92639111	59.16626787	153.9862837	208.6646191	425.6194569	726.6578938	1859.924931	NA
ENSMUSG00000103861	45.00911035	-1.894073325	0.494022701	-3.833980343	0.000126086	0.002770745	TEC	Gm37419	19.7189017	18.44868732	67.99705412	73.87179824	-77168.6869	-70693.78831	-261001.4907	-293954.0862	NA
ENSMUSG00000048251	62.49387475	-1.669384704	0.438234955	-3.80933717	0.00013934	0.00298731	protein_coding	Bcl11b	22.83241249	36.89737465	105.969435	84.27627687	17.43371292	27.70710256	77.91725811	62.0719643	NA
ENSMUSG00000089796	242.209808	0.925178807	0.243834564	3.794289021	0.000148067	0.003093761	processed_transcript	Gm16575	346.6375351	288.3821124	181.9141967	151.9053879	-1328285.319	-1106932.678	-723881.41	-594472.2227	NA
ENSMUSG00000090038	129.2847579	1.143370393	0.301772168	3.788853029	0.000151344	0.003093761	antisense	Gm16573	191.9998323	164.0962188	83.00939075	78.03358969	-735726.8982	-629870.7833	-330314.8181	-305379.5664	NA
ENSMUSG00000061477	75.41066583	1.443030092	0.386353454	3.734999848	0.000187715	0.00375004	protein_coding	Rps7	123.5025948	97.09835434	41.50469537	39.53701878	713.2761309	551.5070087	230.8308195	220.2609901	NA
ENSMUSG00000108353	117.6171288	1.196117761	0.321115148	3.724887379	0.000195402	0.003816861	TEC	RP24-144C5.1	175.3944414	152.4444163	81.2432335	61.38642389	-672096.4637	-585146.2307	-323286.8433	-240231.9256	NA
ENSMUSG00000085563	102.7158652	1.230219394	0.333743961	3.686117312	0.000227701	0.004351077	antisense	2210411M09Rik	131.8052903	156.3283505	64.46473962	58.2650803	-505066.5733	-600054.4149	-256521.0822	-228016.7429	NA
ENSMUSG00000050708	52.52090527	-1.6759346	0.455758375	-3.677243667	0.000235768	0.00440936	protein_coding	Ftl1	22.83241249	27.18753922	76.82784037	83.23582901	114.6682141	136.7723323	400.6774655	426.9176988	NA
ENSMUSG00000054823	67.75962113	-1.460147996	0.399387428	-3.655968846	0.000256212	0.004596138	protein_coding	Whsc1l1	36.3242926	35.92639111	98.904806	99.88299481	23.38415404	23.97651354	64.91534833	64.19171046	NA
ENSMUSG00000106218	73.68853555	-1.457195847	0.398243822	-3.659054493	0.000253148	0.004596138	antisense	Gm43713	47.74049885	31.07147339	107.7355922	108.2065777	-189971.2075	-121596.2653	-412833.5538	-415342.6712	NA
ENSMUSG00000097160	369.0350386	-0.76446382	0.210487964	-3.631864767	0.000281381	0.00494667	lincRNA	A630072L19Rik	281.2538084	266.0494909	509.5363666	419.3004886	-1079571.229	-1058676.475	-1994038.661	-1606723.528	NA
ENSMUSG00000079435	88.10668279	1.281973122	0.354256467	3.618771257	0.000296005	0.005101735	protein_coding	Rpl36a	121.426921	128.1698277	47.68624575	55.14373672	955.0982531	1045.121565	382.4121648	433.0042457	NA
ENSMUSG00000080058	740.8665126	0.741109349	0.207337407	3.574412155	0.000351016	0.005933514	protein_coding	Gm11175	1103.220658	751.5412626	597.8442291	510.8599005	8069.828707	5406.451592	4211.190874	3604.589429	NA
ENSMUSG00000096923	46.45992465	1.795003396	0.50518188	3.553182459	0.0003806	0.006312221	protein_coding	A730071L15Rik	87.17830224	57.28802906	24.7262015	16.6471658	-341166.8263	-219522.8163	-94909.633	-66243.17435	NA
ENSMUSG00000045576	78.40445074	1.330247152	0.374949324	3.547805175	0.000388455	0.006323191	protein_coding	St7l	104.8215301	119.4309758	41.50469537	47.86060168	207.7178238	245.3512024	83.85442753	94.68132306	NA
ENSMUSG00000075256	416.0119874	-0.702566812	0.200929539	-3.496583006	0.000471258	0.007531557	protein_coding	Cerkl	287.48083	345.6701415	514.8348384	516.0621398	464.6454321	549.4550979	801.3009611	804.5755675	NA
ENSMUSG00000108321	205.8622102	0.869295342	0.251307324	3.459092751	0.000541998	0.008507436	antisense	RP23-362F15.1	288.5186669	243.7168694	146.5910517	144.6222529	-1105578.798	-935488.5598	-583321.9129	-565970.1298	NA
ENSMUSG00000097533	151.5625344	0.957946328	0.281850032	3.398780274	0.000676871	0.010438059	lincRNA	Gm26590	202.3782016	198.0806429	112.1509854	93.64030763	-776813.2458	-788211.6822	-438895.8578	-358821.6315	NA
ENSMUSG00000074211	66.19029911	-1.356167015	0.403036825	-3.364871227	0.000765794	0.011605739	protein_coding	Sdhaf1	39.43780339	34.95540756	93.60633425	96.76165122	159.3463068	146.4170308	385.60266	390.2972132	NA
ENSMUSG00000045826	48.62684251	-1.600531216	0.480789953	-3.328961444	0.000871705	0.012986923	protein_coding	Ptprcap	26.98376022	21.36163796	84.775548	61.38642389	122.4291956	100.4766201	392.1557897	278.0467068	NA
ENSMUSG00000097582	100.7952462	1.130601968	0.340635617	3.319094985	0.000903097	0.013230372	lincRNA	Gm26527	131.8052903	144.676548	53.86779612	72.83135038	-505066.5733	-555329.8622	-214353.233	-285020.9287	NA
ENSMUSG00000054452	48.2845349	-1.548181014	0.469302349	-3.298898924	0.000970649	0.013908262	protein_coding	Aes	25.94592329	23.30360504	74.1786045	69.71000679	115.3393896	103.7692637	342.4303293	316.4799838	NA
ENSMUSG00000101674	228.0730753	0.787569432	0.238953161	3.295915521	0.000981015	0.013908262	antisense	4930444A19Rik	297.8591993	279.6432605	158.9541525	175.8356888	-1185255.142	-1094366.387	-609098.686	-674931.8406	NA
ENSMUSG00000027612	99.01397679	-1.107823685	0.338488127	-3.272858327	0.001064658	0.014854518	protein_coding	Mmp24	66.42156361	59.22999615	146.5910517	123.8132956	59.11293553	54.64659126	133.0106424	110.0027672	NA
ENSMUSG00000022960	238.0108979	-0.776081316	0.237548091	-3.267049262	0.001086748	0.0149258	protein_coding	Donson	189.9241585	161.1832682	300.2467325	300.6894323	339.665178	283.4969106	517.0875237	518.7296109	NA
ENSMUSG00000097154	59.1009763	-1.394580078	0.428967868	-3.251012913	0.001149946	0.015550813	lincRNA	Gm26510	30.09727101	34.95540756	77.710919	93.64030763	-115526.0725	-139096.1792	-304116.8149	-358821.6315	NA
ENSMUSG00000092550	444.9170381	0.627620732	0.194581068	3.225497418	0.00125754	0.016748142	antisense	Gm20496	543.8265521	536.9538995	375.3084156	323.5792853	-2087436.62	-2136671.864	-1468745.981	-1239928.082	NA
ENSMUSG00000016510	173.9855337	0.85025564	0.264730119	3.211782787	0.001319141	0.017051834	protein_coding	Mtif3	229.3619618	218.4712973	131.5787151	116.5301606	528.3070477	492.7388361	297.2659404	272.9265571	NA
ENSMUSG00000024824	233.7614531	0.766528643	0.238473104	3.21431906	0.001307543	0.017051834	protein_coding	Rad9a	281.2538084	307.8017833	183.680354	162.3098666	544.0827422	585.5921258	342.1717892	302.8750641	NA
ENSMUSG00000054556	114.0716782	1.006066398	0.315422617	3.189582309	0.001424786	0.018150529	antisense	Gm4876	162.9403982	141.7635973	77.710919	73.87179824	291.145034	249.1167312	133.7142253	127.3243137	NA
ENSMUSG00000026223	65.92153691	-1.290650931	0.406759649	-3.173006308	0.001508692	0.018944867	protein_coding	Itm2c	42.55131419	33.98442402	88.3078625	98.84254694	87.50494131	68.43163401	178.1203232	206.6835774	NA
ENSMUSG00000043866	377.5764216	0.637710289	0.202499919	3.149187877	0.001637249	0.019988082	protein_coding	Taf10	432.7780004	486.4627553	291.4159462	299.6489844	2180.033135	2540.361103	1496.637868	1506.862494	NA
ENSMUSG00000106698	99.13923968	-1.150888933	0.365324993	-3.150315349	0.001630943	0.019988082	antisense	Gm43599	76.79993293	46.60721008	154.5387594	118.6110563	-294290.7593	-178898.2106	-614947.7997	-464176.941	NA
ENSMUSG00000058546	106.7379628	1.081528008	0.345821697	3.127415134	0.001763507	0.02102628	protein_coding	Rpl23a	175.3944414	114.5760581	66.23089687	70.75045465	1260.968975	825.1246426	494.4635216	519.4699317	NA
ENSMUSG00000075284	80.65789936	-1.145229853	0.366319642	-3.126312987	0.00177013	0.02102628	protein_coding	Wipf1	52.9296835	47.57819363	113.9171426	108.2065777	51.27153507	45.12761369	108.2332272	106.5793647	NA
ENSMUSG00000064372	66.81093558	1.248105559	0.400743702	3.114473294	0.001842736	0.02159687	Mt_tRNA	mt-Tp	101.7080193	86.41753536	40.62161675	38.49657092	5731.417808	4878.045572	2377.109142	2215.498815	NA
ENSMUSG00000028359	57.60885901	-1.390138991	0.4492659	-3.094245503	0.001973141	0.022700785	protein_coding	Orm3	40.47564033	23.30360504	86.54170525	80.11448542	206.7555141	117.069575	425.7001228	394.7539459	NA
ENSMUSG00000059149	928.4628248	0.491616347	0.158999685	3.091932831	0.001988578	0.022700785	protein_coding	Mfsd4	1105.296332	1065.168947	785.9399762	757.446044	3054.742728	2948.842065	2255.642849	2137.913926	NA
ENSMUSG00000091102	129.7890865	0.932025244	0.301941781	3.086771369	0.002023432	0.022802518	TEC	5830462I19Rik	181.621463	159.2413011	97.13864875	81.15493328	-710764.2215	-610199.0149	-372859.2725	-322935.475	NA
ENSMUSG00000097472	302.6525242	-0.672238393	0.218126289	-3.081876996	0.002056998	0.022887359	lincRNA	Gm26586	223.1349403	243.7168694	392.0869095	351.6713775	-855033.9627	-935488.5598	-1560210.418	-1376243.913	NA
ENSMUSG00000047675	122.3430556	0.926370548	0.305231139	3.034980476	0.002405513	0.02611266	protein_coding	Rps8	168.1295829	152.4444163	80.36015487	88.43806832	892.3243056	810.451843	442.8986923	479.3585069	NA
ENSMUSG00000108034	90.78486562	-1.147072614	0.377962651	-3.034883506	0.002406286	0.02611266	antisense	Gm43989	69.53507441	43.69425945	144.8248945	105.0852341	-272121.1591	-167432.6565	-555899.279	-418160.0381	NA
ENSMUSG00000000766	97.63182415	1.055409993	0.351214234	3.005031949	0.00265553	0.028178833	protein_coding	Oprm1	139.0701488	124.2858936	51.21856025	75.95269397	345.3693379	309.1781562	132.0876674	192.6351985	NA
ENSMUSG00000064368	4114.339465	0.517120671	0.172119461	3.004428835	0.0026608	0.028178833	protein_coding	mt-Nd6	5452.795238	4234.459233	2954.781079	3815.322312	40182.00752	31257.01509	22611.15756	28713.50949	NA
ENSMUSG00000039218	137.1817406	-0.888558364	0.297398653	-2.987768625	0.002810222	0.029406967	protein_coding	Srrm2	90.29181303	101.9532721	159.8372311	196.644646	40.25298692	47.1193019	72.64959283	87.5174711	NA
ENSMUSG00000038500	63.37263161	-1.358858698	0.456950373	-2.973755527	0.002941794	0.030421606	protein_coding	Prr3	36.3242926	34.95540756	121.8648502	60.34597603	52.92688028	50.09000309	170.9907211	84.81633569	NA
ENSMUSG00000035545	50.06732284	-1.353809371	0.459638546	-2.945378241	0.003225601	0.03296864	protein_coding	Leng8	31.13510794	25.24557213	74.1786045	69.71000679	32.86846263	27.62880959	79.83864777	73.46610839	NA
ENSMUSG00000003429	263.6897536	0.730021577	0.251906554	2.897985645	0.003755678	0.036847011	protein_coding	Rps11	391.2645231	267.0204744	203.9911624	192.4828546	2698.130764	1802.994833	1379.743563	1349.6682	NA
ENSMUSG00000018474	85.9279183	-1.024164314	0.354002918	-2.89309568	0.003814651	0.036847011	protein_coding	Chd3	55.00535737	58.2590126	113.9171426	116.5301606	30.32417145	31.58672726	60.47668675	61.96898135	NA
ENSMUSG00000087366	74.03725496	1.104095188	0.380789616	2.899488698	0.003737718	0.036847011	antisense	Junos	106.8972039	95.15638725	44.15393125	49.9414974	-410316.7401	-378650.7101	-172793.6448	-191371.5368	NA
ENSMUSG00000097344	219.7490439	-0.767166853	0.265145246	-2.893383401	0.003811158	0.036847011	lincRNA	Gm26732	187.8484846	137.8796632	310.843676	242.424352	-721042.0384	-548657.1514	-1216467.26	-928949.3349	NA
ENSMUSG00000104208	321.7714695	0.616558587	0.212449907	2.902136294	0.003706273	0.036847011	antisense	Gm37401	410.9834248	368.002763	249.0281722	259.0715178	-1608357.895	-1410155.04	-955875.5895	-1030909.401	NA
ENSMUSG00000005481	520.6188043	0.528598239	0.183517864	2.880363952	0.003972163	0.037543351	protein_coding	Ddx39	643.4588975	586.4740602	423.87774	428.6645194	1638.183936	1468.412992	1039.195881	1052.716549	NA
ENSMUSG00000100548	487.7491971	0.569479126	0.19760382	2.881923667	0.003952555	0.037543351	antisense	Gm29585	632.0426912	534.0409489	423.87774	361.0354083	-2515053.595	-2089935.809	-1624263.163	-1385806.797	NA
ENSMUSG00000022906	133.6807201	0.888965274	0.311976732	2.849460172	0.004379349	0.040520501	protein_coding	Parp9	181.621463	166.0381859	112.1509854	74.91224611	212.7660889	194.8409891	136.4342413	89.6253084	NA
ENSMUSG00000105415	141.7647545	0.834953006	0.292718374	2.852410646	0.004338901	0.040520501	miRNA	Gm44364	188.8863215	174.7770378	113.9171426	89.47851618	-723796.1917	-670868.2899	-453304.3781	-350168.5695	NA
ENSMUSG00000091191	125.3657956	0.871620997	0.307074225	2.838470066	0.004533037	0.041077728	protein_coding	Gm17334	169.1674198	155.3573669	98.904806	78.03358969	-649336.2004	-618205.241	-387057.7644	-299018.0262	NA
ENSMUSG00000097546	205.8736367	0.713605471	0.251297344	2.839685688	0.0045158	0.041077728	lincRNA	Gm26749	272.951113	238.8619517	166.0187815	145.6627008	-1047701.967	-950490.558	-649704.1045	-558166.9823	NA
ENSMUSG00000057177	145.0293082	-0.828298436	0.294018939	-2.817160145	0.004845036	0.042166205	protein_coding	Gsk3a	95.48099769	113.6050746	206.6403982	164.3907623	161.5698821	192.5654177	363.1146204	284.0949231	NA
ENSMUSG00000063087	53.76673132	-1.272789883	0.451246597	-2.820608268	0.00479327	0.042166205	processed_transcript	Gm10125	28.02159715	34.95540756	86.54170525	65.54821534	107.6125634	139.1657621	338.8449663	251.3007924	NA
ENSMUSG00000073144	112.1463588	0.918670958	0.325753838	2.820138558	0.004800292	0.042166205	antisense	4930599N23Rik	157.7512136	135.9376961	88.3078625	66.5886632	405.2491585	343.436837	218.4558805	165.0067721	NA
ENSMUSG00000108354	142.5052944	0.827790354	0.292936357	2.825836858	0.004715727	0.042166205	processed_transcript	RP23-144N15.8	183.6971369	180.6029391	89.19094112	116.5301606	-705107.4078	-718663.5926	-349043.1625	-446533.5859	NA
ENSMUSG00000018965	71.97806444	-1.187643621	0.423437988	-2.804763992	0.005035343	0.043392812	protein_coding	Ywhah	33.21078181	54.37507843	78.59399762	121.7323999	80.1778623	128.5383339	186.1055199	298.8298658	NA
ENSMUSG00000097461	222.1468229	-0.819417116	0.293869182	-2.788373761	0.005297339	0.045207387	lincRNA	Gm26735	143.2214965	177.6899884	206.6403982	361.0354083	-569913.6225	-695378.642	-791828.2917	-1385806.797	NA
ENSMUSG00000041841	52.02409396	1.274910663	0.459611486	2.773887732	0.005539079	0.04681587	protein_coding	Rpl37	83.02695451	64.08491387	25.60928012	35.37522733	883.7560338	683.2917768	283.0712094	384.5520466	NA
ENSMUSG00000014551	230.6758401	0.673831979	0.244285765	2.758375953	0.005808935	0.048629082	protein_coding	Mrps25	282.2916453	284.4981782	157.1879952	198.7255418	1536.673064	1523.072235	823.9821105	1043.492189	NA
ENSMUSG00000087249	72.21512472	1.05410593	0.383010682	2.75215805	0.005920394	0.049094588	antisense	Gm16062	101.7080193	93.21442017	45.03700987	48.90104954	-398027.964	-357189.6672	-172871.1172	-194589.3247	NA
ENSMUSG00000000439	257.6121999	0.634016473	0.231447444	2.739353962	0.006156006	0.050571299	protein_coding	Mkrn2	317.578101	308.7727668	184.5634326	219.534499	546.9357567	532.6744474	330.0779201	386.1278713	NA
ENSMUSG00000073415	146.4290804	-1.940864497	0.713331566	-2.720844821	0.006511532	0.052994338	antisense	Gm10501	71.61074827	49.52016071	335.5698775	129.015535	127.2680194	86.17484592	584.9497298	233.1446872	NA
ENSMUSG00000106106	20623.96288	0.437840198	0.161279724	2.714787626	0.006631828	0.052994338	rRNA	Rn18s-rs5	22122.53203	25337.81557	20087.38948	14948.11444	-88031005.63	-99157954.45	-76973154.5	-57377193.81	NA
ENSMUSG00000107317	60.00500859	1.209817238	0.445313927	2.716773866	0.006592163	0.052994338	antisense	Gm19719	65.38372668	101.9532721	30.02467325	42.65836237	-255875.1197	-390676.1986	-115247.4115	-169748.1343	NA
ENSMUSG00000107999	62.01875066	1.120985415	0.416592143	2.69084627	0.007127103	0.05643895	antisense	Gm44123	88.21613917	81.56261765	33.55698775	44.73925809	-345228.3361	-312540.9588	-128805.9305	-178028.5311	NA
ENSMUSG00000063870	77.75037632	-1.058435791	0.396210658	-2.671396565	0.007553635	0.059282545	protein_coding	Chd4	62.27021589	38.83934174	118.3325357	91.55941191	37.05757151	22.63215146	69.07092252	55.4041148	NA
ENSMUSG00000050565	74.26387461	1.009035907	0.380866507	2.649316466	0.008065477	0.062739416	protein_coding	Tor1aip2	98.59450849	100.011305	54.75087475	43.69881023	77.47469225	77.28830546	41.42982988	33.12293449	NA
ENSMUSG00000107802	79.2765967	1.01911491	0.386032381	2.639972605	0.008291273	0.063930078	antisense	1700126G02Rik	120.389084	92.24343662	61.81550375	42.65836237	-462104.2898	-367059.3618	-241911.1027	-163463.1877	NA
ENSMUSG00000038437	45.06583515	-1.295185878	0.492159942	-2.631636117	0.008497482	0.064702464	protein_coding	Mllt6	28.02159715	24.27458859	75.94476175	52.02239313	14.9789326	12.70566077	39.81807929	28.27618083	NA
ENSMUSG00000097680	53.55325777	1.22649638	0.466349685	2.62999294	0.008538664	0.064702464	antisense	Gm26642	64.34588975	85.44655182	23.84312287	40.57746664	-246567.9334	-327980.0528	-94877.66053	-158797.3746	NA
ENSMUSG00000092386	130.0354358	0.771859832	0.294256378	2.623086162	0.008713723	0.065464639	processed_transcript	Gm20536	162.9403982	165.0672024	95.3724915	96.76165122	-624373.6379	-633597.8294	-379510.6421	-378670.6624	NA
ENSMUSG00000109408	676.4631289	0.482205057	0.185474121	2.599850882	0.009326428	0.069473983	processed_transcript	RP23-25M3.6	840.6479145	736.9765095	622.5704306	505.6576612	-3289822.968	-2824030.807	-2389688.974	-2012136.421	NA
ENSMUSG00000038085	75.74287009	0.998762065	0.386623535	2.583293501	0.009786203	0.071426893	protein_coding	Cnbd2	108.9728778	93.21442017	59.16626787	41.6179145	205.4488197	176.0375997	115.8362399	80.13239956	NA
ENSMUSG00000084880	73.66627152	0.997457175	0.385941863	2.584475205	0.009752732	0.071426893	antisense	Tomm6os	96.51883462	100.011305	56.517032	41.6179145	-369851.9002	-383885.7437	-224895.1953	-162869.1021	NA
ENSMUSG00000090062	201.0521643	0.692239725	0.268136467	2.581669449	0.009832371	0.071426893	antisense	Galnt6os	258.4213959	238.8619517	181.0311181	125.8941914	-990248.6359	-916853.3296	-720367.4225	-492679.0339	NA
ENSMUSG00000022723	154.1758175	-0.753139996	0.29239808	-2.575735095	0.010002725	0.071688489	protein_coding	Crybg3	94.44316076	134.9667125	185.4465112	201.8468853	71.7062786	100.7791981	135.5876996	147.8293892	NA
ENSMUSG00000060550	48.86248369	-1.234309044	0.479391394	-2.574741766	0.010031495	0.071688489	protein_coding	H2-Q7	29.05943408	29.1295063	52.9847175	84.27627687	88.98477446	92.47186492	165.4187266	257.6302101	NA
ENSMUSG00000085955	88.08343396	-0.894117775	0.349253567	-2.560082014	0.010464746	0.074181549	processed_transcript	Gm12356	59.15670509	64.08491387	115.6832999	113.408817	-235399.1049	-250792.2971	-443288.4881	-435311.0688	NA
ENSMUSG00000042874	60.65393141	-1.159985309	0.459145626	-2.526399561	0.011523833	0.081035597	protein_coding	D930007J09Rik	36.3242926	38.83934174	111.2679067	56.18418458	353.27811	378.3803102	1123.762477	558.05403	NA
ENSMUSG00000105140	211.5236215	0.633546242	0.251078532	2.523299137	0.011625946	0.081104812	TEC	Gm43127	259.4592329	255.3686719	184.5634326	146.7031486	-1032452.215	-999369.3052	-707231.252	-563108.8138	NA
ENSMUSG00000051457	95.92461371	-0.864930945	0.344278432	-2.512300697	0.011994684	0.083018322	protein_coding	Spn	77.83776986	58.2590126	122.7479289	124.8537435	79.79338187	59.82417424	130.6699444	130.7135651	NA
ENSMUSG00000086327	85.2694011	0.893692113	0.35975552	2.484165117	0.012985558	0.089174262	antisense	Slfn5os	114.1620625	107.7791733	67.1139755	52.02239313	-454278.9745	-421787.0452	-257175.0007	-199683.9765	NA
ENSMUSG00000097763	57.6575547	1.048014922	0.423317927	2.475715899	0.013296934	0.09060469	antisense	Gm26636	77.83776986	77.67868347	39.73853812	35.37522733	-298267.6614	-298163.6844	-158129.4342	-138438.7368	NA
ENSMUSG00000067389	47.04018841	1.216848325	0.494210997	2.462204062	0.013808608	0.093367432	antisense	Gm17080	63.30805282	67.96884804	19.42772975	37.45612305	731.9371022	814.6529907	229.0036257	432.3152187	NA
ENSMUSG00000061540	65.58185665	-0.977010412	0.398614307	-2.451016924	0.014245326	0.094213611	protein_coding	Orm2	45.66482498	42.72327591	86.54170525	87.39762046	224.7191507	217.956976	434.1994152	429.3592172	NA
ENSMUSG00000086288	49.54752856	1.161380066	0.473884727	2.450764922	0.014255302	0.094213611	antisense	Gm15265	72.6485852	64.08491387	22.96004425	38.49657092	-278383.1507	-245985.0396	-91363.6731	-150653.9194	NA
ENSMUSG00000097008	59.7157294	-1.07755238	0.439495	-2.451796673	0.014214496	0.094213611	lincRNA	Gm26860	48.77833578	28.15852276	83.89246937	78.03358969	-186914.4012	-108084.3356	-333828.8056	-305379.5664	NA
ENSMUSG00000026427	258.5039026	0.553470046	0.227360909	2.434323685	0.014919647	0.094850935	protein_coding	Eif2d	321.7294487	293.2370301	205.7573196	213.2918118	624.4924794	590.0694778	407.1900808	413.3076806	NA
ENSMUSG00000058812	50.8590098	1.112841983	0.456471756	2.437920786	0.014772011	0.094850935	antisense	0610039K10Rik	78.87560679	60.20097969	30.02467325	34.33477946	324.2381803	242.3161696	121.0582054	143.5152806	NA
ENSMUSG00000066952	130.3899703	0.749243978	0.307611757	2.435680565	0.014863804	0.094850935	protein_coding	Myo1h	168.1295829	159.2413011	113.034064	81.15493328	240.2155662	227.9028908	167.7070808	118.4171324	NA
ENSMUSG00000084950	104.5506432	0.785518281	0.322939754	2.432398835	0.014999181	0.094850935	antisense	Gm5577	129.7296164	134.9667125	78.59399762	74.91224611	-497112.769	-518059.4017	-312744.881	-293164.3838	NA
ENSMUSG00000090069	135.4647539	0.737856009	0.302487015	2.439298128	0.014715822	0.094850935	antisense	E430024P14Rik	194.0755062	144.676548	98.02172737	105.0852341	-772274.2566	-566182.6102	-375610.8563	-403361.6326	NA
ENSMUSG00000097170	90.69809474	0.838404475	0.343588234	2.440143153	0.014681443	0.094850935	antisense	Gm16982	114.1620625	118.4599923	63.581661	66.5886632	-446766.0821	-453928.5355	-244053.342	-264972.6974	NA
ENSMUSG00000019883	79.49490619	-0.894131403	0.36991009	-2.417158729	0.015642194	0.097514105	protein_coding	Echdc1	51.89184657	59.22999615	94.48941287	112.3683692	67.40512123	77.06773199	127.4564931	149.0666358	NA
ENSMUSG00000044867	696.0349956	-0.410913668	0.169901806	-2.418536198	0.015583095	0.097514105	processed_transcript	Gimap1os	618.5508111	576.7642248	805.367706	783.4572405	1571.772999	1468.080475	2125.170115	2033.163692	NA
ENSMUSG00000035835	208.659153	0.604871349	0.251462893	2.40540997	0.016154332	0.099298305	protein_coding	Plppr3	238.7024942	265.0785074	181.0311181	149.8244922	403.2502813	440.4025209	294.5004142	244.1476767	NA
ENSMUSG00000092006	53.61642571	1.082778849	0.449851831	2.40696775	0.01608559	0.099298305	antisense	Gm17139	72.6485852	72.82376576	27.37543737	41.6179145	-278856.037	-289783.7067	-107132.0598	-159476.2807	NA
ENSMUSG00000071659	49.07952841	-1.193302054	0.501006559	-2.381809247	0.017227819	0.105161478	protein_coding	Hnrnpul2	19.7189017	39.81032528	55.63395337	81.15493328	13.67009901	27.1420235	37.14016378	54.26951278	NA
ENSMUSG00000022565	83.6171317	-0.889832374	0.376644112	-2.362528301	0.018150756	0.110031132	protein_coding	Plec	59.15670509	58.2590126	130.6956365	86.35717259	15.12230972	14.91812964	34.69447226	22.54525596	NA
ENSMUSG00000074136	95.83467886	0.797930977	0.338650095	2.356210699	0.018462442	0.11115402	processed_transcript	4930513N10Rik	113.1242255	130.1117948	66.23089687	73.87179824	134.2050572	154.6204865	81.5941353	89.50237035	NA
ENSMUSG00000065420	67.31612515	-0.979877791	0.418582171	-2.340944882	0.019235007	0.114031047	miRNA	Mir142b	33.21078181	57.28802906	94.48941287	84.27627687	2033.136669	3449.124832	5570.389692	4976.739107	NA
ENSMUSG00000085819	97.13083273	0.79682974	0.340208039	2.342183751	0.019171274	0.114031047	antisense	Ube4bos1	136.9944749	109.7211404	74.1786045	67.62911107	-545134.7693	-429386.8117	-284246.0534	-259589.1695	NA
ENSMUSG00000097722	171.3820347	0.621664327	0.265769058	2.339114761	0.019329495	0.114031047	lincRNA	Gm26841	212.7565709	202.9355606	143.9418159	125.8941914	-816649.8225	-807530.596	-563307.2821	-482415.749	NA
ENSMUSG00000081512	290.3254181	0.535693899	0.229566957	2.333497406	0.019622054	0.114985238	protein_coding	Gm15821	350.7888828	336.9312896	267.5728234	206.0086768	1110.038164	1105.303064	863.2559667	650.7894388	NA
ENSMUSG00000029452	87.92115036	0.829426299	0.356093788	2.329235519	0.019846592	0.115530825	protein_coding	Tmem116	99.63234542	125.2568771	59.16626787	67.62911107	318.4430927	393.7228469	182.104471	208.505357	NA
ENSMUSG00000090570	50.70397953	1.044613688	0.449304373	2.324957759	0.020074219	0.116087096	antisense	Gm17041	69.53507441	66.9978645	30.90775187	35.37522733	-266905.064	-266601.0102	-120955.5514	-135554.8386	NA
ENSMUSG00000001323	150.4097716	0.670893126	0.290147357	2.312249657	0.020763929	0.119290809	protein_coding	Srr	157.7512136	211.6744125	115.6832999	116.5301606	191.5583568	266.4677763	143.220294	141.2633932	NA
ENSMUSG00000004896	203.3641515	0.699043541	0.303733325	2.301504259	0.021363145	0.120383124	protein_coding	Rrnad1	236.6268204	266.0494909	106.8525136	203.9277811	573.744884	631.6473618	254.1172241	502.7750222	NA
ENSMUSG00000085089	100.9304632	0.776881637	0.337081891	2.304726706	0.021181884	0.120383124	antisense	Arhgap15os	143.2214965	111.6631075	69.76321137	79.07403756	-560488.3575	-427883.4556	-267780.7502	-314655.0782	NA
ENSMUSG00000085990	75.42301701	0.916446179	0.398618828	2.299053921	0.021501878	0.120383124	processed_transcript	Gm16731	112.0863886	85.44655182	63.581661	40.57746664	-446019.3567	-334389.7295	-243639.4744	-155753.5017	NA
ENSMUSG00000097889	589.3933301	0.420913936	0.18300138	2.30005881	0.021444888	0.120383124	lincRNA	Gm26541	683.9345378	666.0947108	546.6256688	460.9184031	-2625230.405	-2650554.971	-2139185.323	-1766199.808	NA
ENSMUSG00000090213	73.15665602	0.910524336	0.396673906	2.295397609	0.021710348	0.120780988	protein_coding	Tmem189	90.29181303	100.9822885	61.81550375	39.53701878	-345990.4873	-387612.7897	-245979.1199	-154725.647	NA
ENSMUSG00000092596	78.28637153	0.930254971	0.407178852	2.284634788	0.022334251	0.122698793	processed_transcript	Gm20490	119.3512471	86.41753536	68.88013275	38.49657092	-474928.0187	-338189.6128	-263942.7639	-147766.1426	NA
ENSMUSG00000108573	74.00060624	0.859713029	0.37605685	2.286125167	0.022246937	0.122698793	TEC	RP24-399H16.1	98.59450849	92.24343662	52.10163887	53.06284099	-385843.4345	-353468.9415	-199988.1552	-211150.1182	NA
ENSMUSG00000058966	94.08825642	0.804887775	0.354499014	2.270493691	0.023177646	0.126164397	protein_coding	Fam57b	132.8431272	106.8081898	79.47707625	57.22463244	272.4120247	215.401784	156.943748	113.1936997	NA
ENSMUSG00000086816	80.18056215	0.823448324	0.362869864	2.269266222	0.023252141	0.126164397	processed_transcript	Gm16726	105.859367	99.04032143	56.517032	59.30552817	-421240.5036	-387588.0956	-216568.4217	-227639.7332	NA
ENSMUSG00000097234	304.162064	0.482101401	0.213297899	2.260225735	0.023807244	0.128383852	lincRNA	Gm26518	350.7888828	358.2929275	257.8589585	249.707487	-1372790.325	-1372947.783	-989771.887	-993647.6153	NA
ENSMUSG00000092405	216.6123911	0.60808425	0.270004367	2.25212746	0.024314218	0.130318281	antisense	Gm20402	292.6700147	231.0940833	202.2250051	140.4604614	-1145345.774	-885532.7167	-776225.2127	-558926.7836	NA
ENSMUSG00000057841	84.36131353	0.814748869	0.363087764	2.243944714	0.024835959	0.132307925	protein_coding	Rpl32	117.2755733	98.06933788	67.99705412	54.10328885	874.2995004	732.3572988	526.4144589	411.9257446	NA
ENSMUSG00000068329	90.68714503	0.81638376	0.365797462	2.231791755	0.02562873	0.134702033	protein_coding	Htra2	140.1079857	91.27245308	62.69858237	68.66955893	341.6223227	217.911661	149.9462382	170.251149	NA
ENSMUSG00000086717	109.1413083	-0.728635323	0.32690754	-2.228872796	0.02582237	0.134702033	antisense	Gm15655	80.95128065	83.50458473	154.5387594	117.5706085	-316797.7673	-319982.4102	-593185.2062	-467842.4189	NA
ENSMUSG00000086890	60.41630769	-0.928002555	0.416568174	-2.227732729	0.025898343	0.134702033	antisense	1700021J08Rik	42.55131419	40.78130882	86.54170525	71.79090252	-169322.1632	-159595.0982	-331620.3957	-275563.8876	NA
ENSMUSG00000104653	128.1544424	0.787885918	0.353110733	2.231271511	0.02566315	0.134702033	antisense	Gm43109	146.3350073	177.6899884	62.69858237	125.8941914	-572672.887	-680892.8032	-240663.7122	-500964.006	NA
ENSMUSG00000069808	88.32323857	0.769451829	0.347007452	2.217392811	0.026596261	0.137518312	protein_coding	Fam57a	111.0485517	111.6631075	67.1139755	63.46731962	217.364289	226.5859342	133.9349006	124.0190352	NA
ENSMUSG00000084869	75.47049022	0.820662553	0.372314313	2.204219725	0.027508895	0.141405374	lincRNA	Gm13063	97.55667155	95.15638725	52.9847175	56.18418458	-381781.9247	-364631.1186	-203377.785	-223570.7134	NA
ENSMUSG00000023050	388.3570308	0.438082458	0.200001755	2.190393065	0.028495743	0.142518618	protein_coding	Map3k12	425.5131419	468.0140679	319.6744622	340.2264511	315.2609982	347.3387855	245.9519429	257.4352107	NA
ENSMUSG00000028619	57.33873512	0.928090521	0.422956623	2.194292444	0.028214392	0.142518618	protein_coding	Tceanc2	73.68642213	76.70769993	41.50469537	37.45612305	311.9323712	319.3518935	169.1940794	152.9494288	NA
ENSMUSG00000032657	116.133202	-0.685258069	0.312161115	-2.195206372	0.028148797	0.142518618	protein_coding	Fam189b	80.95128065	97.09835434	143.9418159	142.5413572	121.6581288	142.8850115	212.1772847	217.8214978	NA
ENSMUSG00000039176	44.8152662	-1.063199375	0.484098033	-2.196248081	0.028074192	0.142518618	protein_coding	Polg	24.90808635	33.01344048	54.75087475	66.5886632	22.74293889	29.5157895	49.03337482	61.82284121	NA
ENSMUSG00000104444	58.89016958	1.004850944	0.458870463	2.18983575	0.028536151	0.142518618	antisense	Gm33051	84.06479145	72.82376576	25.60928012	53.06284099	-322129.0743	-279528.4541	-101905.6354	-207658.1052	NA
ENSMUSG00000006782	127.357285	-0.680702651	0.311852025	-2.182774506	0.02905242	0.144277272	protein_coding	Cnp	84.06479145	111.6631075	172.2003319	141.5009093	146.0124476	190.7405405	288.0213487	237.0756945	NA
ENSMUSG00000040822	87.46703317	0.825015436	0.378581128	2.179230225	0.02931457	0.144761274	protein_coding	1700123O20Rik	130.7674534	93.21442017	75.94476175	49.9414974	515.2038774	361.1770256	288.1324917	189.7986312	NA
ENSMUSG00000091423	114.060232	0.733438808	0.337298049	2.174453156	0.02967112	0.145703432	protein_coding	Gm17509	111.0485517	173.8060543	89.19094112	82.19538114	-425528.5303	-667141.2439	-354912.7301	-321666.4767	NA
ENSMUSG00000028081	243.0936831	0.592784115	0.274736758	2.157643988	0.030955522	0.151166132	protein_coding	Rps3a1	366.3564368	218.4712973	189.8619044	197.6850939	1647.945945	962.2566467	837.6671221	904.1812591	NA
ENSMUSG00000073778	52.26586626	-0.96017003	0.446303207	-2.151385011	0.031445823	0.152712037	antisense	Faddos	31.13510794	39.81032528	71.52936862	66.5886632	115.4931707	144.596923	260.2464547	251.1589549	NA
ENSMUSG00000052673	60.14227505	-1.007279461	0.468695237	-2.149113927	0.03162537	0.152740111	protein_coding	Gm9887	37.36212953	42.72327591	109.5017495	50.98194527	237.8769903	267.5117836	671.3621072	313.1044752	NA
ENSMUSG00000032035	130.6293037	-0.63055175	0.295313517	-2.135194344	0.032745139	0.157284027	protein_coding	Ets1	108.9728778	96.1273708	157.1879952	160.2289708	135.642027	117.1602558	191.9065189	202.7959775	NA
ENSMUSG00000060029	321.6084013	0.451734448	0.21274062	2.123404779	0.033719947	0.161086051	processed_transcript	4930473A02Rik	377.772643	365.0898123	254.326644	289.2445058	1042.587857	986.5958134	688.443842	811.6891075	NA
ENSMUSG00000035697	54.41834921	-0.92078903	0.43545407	-2.114549144	0.034468392	0.163771441	protein_coding	Hmha1	38.39996646	36.89737465	76.82784037	65.54821534	39.2809583	37.11968252	75.68064221	64.67912864	NA
ENSMUSG00000101942	46.50861156	1.027129398	0.48647737	2.111361105	0.034741286	0.164180591	antisense	Gm19582	71.61074827	53.40409489	37.08930225	23.93030084	-274406.2485	-204987.533	-147587.4719	-93649.73371	NA
ENSMUSG00000101225	78.6389257	-0.854347149	0.407243213	-2.097879404	0.0359158	0.168823466	antisense	1700008J07Rik	53.96752043	58.2590126	131.5787151	70.75045465	-207150.1989	-231826.9654	-514925.0616	-271109.6771	NA
ENSMUSG00000097121	133.1903305	-0.688732866	0.328970465	-2.093600914	0.036295546	0.169700984	lincRNA	D130020L05Rik	95.48099769	108.7501569	205.7573196	122.7728478	-379942.415	-425586.9284	-788444.4102	-471254.1846	NA
ENSMUSG00000098889	113.8537675	0.662846357	0.317801518	2.085724326	0.037003602	0.172096115	antisense	Gm27206	146.3350073	133.0247454	98.02172737	78.03358969	-561695.7316	-529338.2376	-383601.8915	-299018.0262	NA
ENSMUSG00000059291	99.64735215	0.700750112	0.337173829	2.078305169	0.037681261	0.174325411	protein_coding	Rpl11	139.0701488	107.7791733	76.82784037	74.91224611	894.8864625	694.7138743	513.3785158	492.299553	NA
ENSMUSG00000033849	87.0147639	0.721677104	0.349647432	2.064013739	0.039016414	0.178622019	protein_coding	B3galt2	108.9728778	107.7791733	68.88013275	62.42687175	97.95119272	95.27604363	59.62113483	54.12712262	NA
ENSMUSG00000085767	176.902756	0.537923376	0.26049429	2.065010237	0.038922032	0.178622019	antisense	Gm13563	205.4917124	213.6163796	150.1233662	138.3795657	-804178.9477	-818559.6541	-576237.0575	-550646.3868	NA
ENSMUSG00000031821	167.7205564	0.549045096	0.26631782	2.061616063	0.039244304	0.178734419	protein_coding	Gins2	204.4538755	194.1967087	142.1756586	130.0559828	772.3141292	718.2868148	526.7667855	499.5413124	NA
ENSMUSG00000028459	115.7494528	0.640730893	0.313303715	2.045079142	0.040847056	0.185075064	protein_coding	Cd72	140.1079857	141.7635973	81.2432335	99.88299481	376.6062924	395.0366123	222.6472734	268.0273625	NA
ENSMUSG00000031303	150.5843796	0.589363321	0.289207986	2.03785286	0.04156465	0.186952407	protein_coding	Map3k15	185.7728107	175.7480214	102.4371205	138.3795657	169.1228062	157.3504634	89.80330915	121.5189608	NA
ENSMUSG00000105941	78.22408728	0.783898492	0.384899122	2.03663362	0.041686771	0.186952407	antisense	Gm42809	107.9350409	90.30146954	68.88013275	45.77970595	-429500.1213	-353389.1459	-263942.7639	-175721.8993	NA
ENSMUSG00000035295	3441.320089	0.305776268	0.150361861	2.033602578	0.041991682	0.1873639	protein_coding	Wdr38	4151.347726	3458.643382	3246.197025	2909.092224	8142.376435	7032.597944	6491.46079	5696.163525	NA
ENSMUSG00000022681	74.75719917	0.762772566	0.376377722	2.026614544	0.042701848	0.189570325	protein_coding	Ntan1	86.14046531	101.9532721	54.75087475	56.18418458	315.0486772	386.5623529	204.1582845	205.1386173	NA
ENSMUSG00000087486	46.61714622	0.943199467	0.467574963	2.017215508	0.043673028	0.192907497	antisense	Gm11723	66.42156361	56.31704552	33.55698775	30.17298801	-264307.767	-220393.2308	-128587.5004	-115816.7064	NA
ENSMUSG00000029580	377.6501585	-0.433020275	0.215356947	-2.010709571	0.044356142	0.193015095	protein_coding	Actb	353.9023936	289.3530959	475.0963002	392.2488442	1127.829686	902.9122628	1485.033229	1271.054394	NA
ENSMUSG00000087700	202.8139803	0.518238954	0.257440121	2.013046578	0.04410973	0.193015095	processed_transcript	Gm15283	208.6052232	268.9624415	165.1357029	168.5525537	-799357.3326	-1032391.757	-657115.6488	-659619.8635	NA
ENSMUSG00000097577	70.47860206	0.77427775	0.384903952	2.011612889	0.04426076	0.193015095	lincRNA	6230400D17Rik	94.44316076	83.50458473	52.9847175	50.98194527	-362512.8481	-332285.317	-207352.3738	-195358.4438	NA
ENSMUSG00000005698	49.07293546	-0.958584245	0.477553774	-2.007280223	0.044719834	0.193639083	protein_coding	Ctcf	23.87024942	42.72327591	66.23089687	63.46731962	24.11514619	43.23491337	69.48301002	65.48256807	NA
ENSMUSG00000024608	169.3398553	0.532860281	0.266265888	2.001233748	0.045367206	0.195479283	protein_coding	Rps14	187.8484846	212.645396	139.5264227	137.3391179	1211.092719	1342.403506	882.308897	900.3396844	NA
ENSMUSG00000058558	137.1895891	-0.574502875	0.288861276	-1.988853896	0.046717332	0.197425648	protein_coding	Rpl5	104.8215301	115.5470417	159.8372311	168.5525537	410.9800049	469.652858	638.9305355	659.7333368	NA
ENSMUSG00000069833	67.72143538	-0.7888881	0.395465744	-1.994832959	0.046061101	0.197425648	protein_coding	Ahnak	50.85400964	48.54917717	94.48941287	76.99314183	169.3394427	158.9909326	302.9919079	247.3073517	NA
ENSMUSG00000084917	47.59535085	0.915587481	0.459484719	1.992639676	0.046300917	0.197425648	lincRNA	Gm17477	62.27021589	62.14294678	32.67390912	33.2943316	-247788.5315	-243192.5305	-125203.6188	-127797.745	NA
ENSMUSG00000107379	140.8913022	0.57216045	0.287404599	1.990783907	0.046504649	0.197425648	antisense	Gm43126	162.9403982	173.8060543	105.0863564	121.7323999	-648379.9908	-680179.1089	-402681.909	-467260.5051	NA
ENSMUSG00000022773	73.82852503	0.775835524	0.394473457	1.966762302	0.04921062	0.202330684	protein_coding	Ypel1	76.79993293	109.7211404	60.93242512	47.86060168	418.0654659	587.3964593	319.4087956	251.312255	NA
ENSMUSG00000036565	48.60148048	-0.974436181	0.495830554	-1.965260457	0.0493841	0.202330684	protein_coding	Ttyh3	22.83241249	42.72327591	76.82784037	52.02239313	19.48023047	35.84795556	63.12129035	42.81388862	NA
ENSMUSG00000040591	186.7583015	-0.517356664	0.263372707	-1.96435185	0.049489303	0.202330684	protein_coding	1110051M20Rik	144.2593335	163.1252353	241.9635432	197.6850939	375.2408557	415.4748539	617.3204064	522.8565606	NA
ENSMUSG00000084835	63.24075171	0.82230648	0.416506678	1.974293627	0.048348365	0.202330684	antisense	Gm12352	66.42156361	95.15638725	47.68624575	43.69881023	-264307.767	-372388.5624	-182729.6058	-167734.5403	NA
ENSMUSG00000097335	88.51801652	0.718487238	0.364812371	1.969470597	0.048899076	0.202330684	lincRNA	Gm26563	113.1242255	106.8081898	52.9847175	81.15493328	-450149.1656	-417987.1619	-203032.8953	-311507.0034	NA
ENSMUSG00000097811	58.02394502	0.83147703	0.423006187	1.965637987	0.049340443	0.202330684	lincRNA	2810425M01Rik	77.83776986	70.88179867	45.9200885	37.45612305	-304613.2378	-271612.9761	-176260.747	-149047.1423	NA
ENSMUSG00000097854	60.7674627	0.843889266	0.428558587	1.969133959	0.04893771	0.202330684	protein_coding	Gm26602	90.29181303	66.02688095	50.33548162	36.41567519	-346578.2174	-262737.2274	-196984.7551	-139541.7456	NA
ENSMUSG00000087367	150.0152554	0.545870512	0.279999435	1.949541474	0.051230795	0.208480874	antisense	Gm15491	174.3566045	181.5739226	113.034064	131.0964307	-693807.8883	-710578.1752	-433136.8433	-503203.6208	NA
ENSMUSG00000097099	130.4792075	0.583004337	0.299497372	1.946609193	0.051581606	0.208941158	antisense	Gm9917	140.1079857	172.8350707	105.969435	103.0043384	-548303.828	-662289.1747	-406755.57	-409879.6413	NA
ENSMUSG00000042105	58.43100926	0.819927342	0.422204995	1.942012414	0.052135597	0.209482084	protein_coding	Inpp5f	68.49723747	80.5916341	38.8554595	45.77970595	113.6809369	130.96702	63.25008863	77.25561046	NA
ENSMUSG00000087352	105.731162	0.659088411	0.339515542	1.941261386	0.052226581	0.209482084	antisense	Gm12999	111.0485517	147.5894986	70.64629	93.64030763	-434581.5526	-565550.3065	-271170.38	-372617.8557	NA
ENSMUSG00000099051	73.96069386	0.732500812	0.377658454	1.939585366	0.052430101	0.209482084	antisense	Gm27241	95.48099769	89.33048599	60.0493465	50.98194527	-365874.998	-342888.2371	-238951.145	-199514.6501	NA
ENSMUSG00000020668	68.45767839	0.750510951	0.388735327	1.930647664	0.053526639	0.211640748	protein_coding	Kif3c	89.2539761	82.53360119	52.10163887	49.9414974	50.93916377	46.12245655	29.16554692	28.98199257	NA
ENSMUSG00000032182	93.66364652	0.652765326	0.338341783	1.929307462	0.053692704	0.211640748	protein_coding	Yipf2	117.2755733	111.6631075	69.76321137	75.95269397	230.2829514	215.6361107	131.9154431	143.8631166	NA
ENSMUSG00000086016	88.96691548	0.689913737	0.357564227	1.929481992	0.053671054	0.211640748	antisense	1700084C06Rik	126.6161056	93.21442017	71.52936862	64.50776748	-503836.6808	-364788.7958	-274094.4087	-247608.1309	NA
ENSMUSG00000074213	77.8256095	-0.754423667	0.391458505	-1.927212358	0.053953171	0.211718022	protein_coding	Gm10642	51.89184657	64.08491387	118.3325357	76.99314183	126.0555505	152.4319654	281.9431325	190.176711	NA
ENSMUSG00000030706	47.01342761	0.909525605	0.472451656	1.925118882	0.054214487	0.211762466	protein_coding	Mrpl48	68.49723747	54.37507843	37.08930225	28.09209229	284.8552614	234.4223557	157.2553214	116.6267491	NA
ENSMUSG00000086976	55.50132068	0.857131149	0.44566377	1.923268629	0.054446322	0.211762466	antisense	Gm12316	68.49723747	74.76573284	48.56932437	30.17298801	-268059.6492	-286495.8789	-186429.6362	-120065.7535	NA
ENSMUSG00000085754	549.9546554	0.354719508	0.185474985	1.912492451	0.05581306	0.216121937	antisense	Gm15886	659.0264515	575.7932412	505.1209735	459.8779553	-2622428.625	-2253330.791	-1935580.269	-1765206.352	NA
ENSMUSG00000039195	66.03910195	-0.756218757	0.396858401	-1.905512783	0.056713447	0.21775287	protein_coding	1110008P14Rik	46.70266191	51.4621278	78.59399762	87.39762046	302.095773	325.9478713	498.6397483	574.8374634	NA
ENSMUSG00000107659	190.2412024	0.500294794	0.26256851	1.905387637	0.056729701	0.21775287	antisense	Gm44170	217.9457556	228.1811327	177.4988036	137.3391179	-836568.1109	-907988.9477	-694630.4522	-526271.7262	NA
ENSMUSG00000085208	201.6212331	0.46926954	0.246720355	1.902030088	0.057167221	0.218478206	antisense	Brip1os	229.3619618	238.8619517	168.6680174	169.5930016	-880388.3453	-950490.558	-660071.7232	-649865.8437	NA
ENSMUSG00000091021	105.9011969	0.643593334	0.339061992	1.898158298	0.057675232	0.219465495	lincRNA	Gm17300	105.859367	152.4444163	88.3078625	76.99314183	-414274.0034	-584153.935	-338962.975	-306374.6814	NA
ENSMUSG00000021040	282.6241245	-0.437400275	0.231713632	-1.887676059	0.059069452	0.223801933	protein_coding	Slirp	244.9295158	234.9780175	284.3513172	366.2376476	2628.988538	2526.45699	3169.478856	4014.700556	NA
ENSMUSG00000091165	82.91016887	0.666300883	0.356732617	1.867787949	0.061791634	0.232114727	antisense	Gm17036	97.55667155	105.8372062	62.69858237	65.54821534	-374463.8211	-421152.3204	-245366.9756	-251175.142	NA
ENSMUSG00000092482	170.3408521	0.492176221	0.263437221	1.868286569	0.061722138	0.232114727	antisense	Gm20531	199.2646908	199.0516264	145.7079731	137.3391179	-779809.8887	-762748.7686	-559288.9087	-546506.1884	NA
ENSMUSG00000097289	428.9325371	0.359798484	0.192889454	1.865309263	0.062138068	0.232422814	lincRNA	2010300F17Rik	480.5184992	483.5498046	359.4130004	392.2488442	-1912101.502	-1892341.878	-1377239.807	-1505617.183	NA
ENSMUSG00000097537	168.5517641	0.549479141	0.297697872	1.845761066	0.064926906	0.241825214	lincRNA	2610020C07Rik	166.053909	234.007034	113.9171426	160.2289708	-637385.2274	-931171.6442	-445807.6036	-613983.6806	NA
ENSMUSG00000097033	251.6629772	0.429805909	0.233496345	1.840739348	0.065659765	0.243522925	lincRNA	Gm26819	291.6321777	286.4401453	234.0158356	194.5637503	-1160476.289	-1120965.57	-896728.621	-746818.0722	NA
ENSMUSG00000021196	44.68147552	0.867584316	0.473327241	1.832948205	0.066810274	0.245884521	protein_coding	Pfkp	58.11886816	57.28802906	30.02467325	33.2943316	85.62358241	83.00374457	42.59606591	47.31497407	NA
ENSMUSG00000035275	52.98061136	0.829390133	0.45262164	1.832413787	0.066889795	0.245884521	protein_coding	Raver2	73.68642213	62.14294678	45.9200885	30.17298801	81.83163391	69.12938633	52.95677328	34.22115607	NA
ENSMUSG00000092341	579.0475227	-0.347069419	0.189576226	-1.830764471	0.067135705	0.245884521	lincRNA	Malat1	473.2536407	545.6927514	590.7796001	706.4640987	-1813467.381	-2094599.883	-2350857.589	-2764703.008	NA
ENSMUSG00000028692	50.02162763	-0.821830938	0.450878398	-1.822733008	0.068343838	0.249270681	protein_coding	Akr1a1	36.3242926	35.92639111	59.16626787	68.66955893	103.3838868	100.1213461	165.1674133	198.7295231	NA
ENSMUSG00000029607	90.66944352	0.628123236	0.346283381	1.813899456	0.069693207	0.253141854	protein_coding	Ankrd61	103.7836931	116.5180252	76.82784037	65.54821534	231.20474	269.0968838	174.4985154	145.7777957	NA
ENSMUSG00000035757	63.70481119	0.735333373	0.406905897	1.807133736	0.07074143	0.255891838	protein_coding	Selo	76.79993293	82.53360119	53.86779612	41.6179145	129.0020496	136.3402616	87.13245121	67.43232639	NA
ENSMUSG00000099937	154.1489129	0.596710847	0.331094967	1.802234723	0.071508484	0.257606382	lincRNA	Gm28872	132.8431272	237.8909681	103.3201991	142.5413572	-519873.2591	-911577.7966	-396586.6807	-567207.1804	NA
ENSMUSG00000097368	98.87875758	-0.59534233	0.330739863	-1.800031976	0.071855589	0.257800257	antisense	Gm10390	79.91344372	77.67868347	124.5140861	113.408817	-306741.6407	-309102.6205	-487278.0784	-434572.8648	NA
ENSMUSG00000057219	51.40687064	0.811913149	0.452192394	1.795503771	0.072573473	0.25826754	protein_coding	Armc7	61.23237895	69.91081513	43.27085262	31.21343588	106.3510419	125.8788952	76.62342621	54.12090973	NA
ENSMUSG00000095332	122.1298377	0.546043392	0.304042938	1.795941705	0.072503789	0.25826754	protein_coding	Gm9821	147.3728443	142.7345809	106.8525136	91.55941191	-565679.3893	-567976.0651	-418160.6205	-350847.8175	NA
ENSMUSG00000064339	351.7930036	-0.376339037	0.211154788	-1.782289857	0.074701976	0.264770309	Mt_rRNA	mt-Rnr2	323.8051226	288.3821124	367.360708	427.6240715	783.8240502	699.262589	923.4483699	1057.157312	NA
ENSMUSG00000109168	122.435984	0.548057134	0.307987056	1.779481066	0.075160926	0.265327126	antisense	RP23-89A16.3	147.3728443	143.7055644	111.2679067	87.39762046	-576734.3969	-550667.4037	-427093.3485	-347776.6653	NA
ENSMUSG00000087026	79.46489112	0.640211716	0.362282843	1.767159909	0.077201452	0.271440304	processed_transcript	A230103J11Rik	96.51883462	97.09835434	61.81550375	62.42687175	-369851.9002	-372704.6055	-245979.1199	-244303.6532	NA
ENSMUSG00000040225	63.09276564	-0.714784903	0.405223285	-1.763928507	0.077744017	0.272258927	protein_coding	Prrc2c	51.89184657	43.69425945	77.710919	79.07403756	19.09162116	16.66541014	29.1495078	29.04293427	NA
ENSMUSG00000064363	119.1475032	0.576708595	0.329144886	1.75214205	0.079749385	0.278173451	protein_coding	mt-Nd4	168.1295829	117.4890088	107.7355922	83.23582901	485.1552104	333.419781	299.3716851	231.685542	NA
ENSMUSG00000031819	75.70624597	0.652531835	0.373173254	1.7486029	0.080359685	0.27919432	protein_coding	Emc8	99.63234542	85.44655182	57.40011062	60.34597603	384.7395739	342.0652742	225.9876642	232.6364255	NA
ENSMUSG00000097488	72.87676453	0.715911737	0.411117793	1.741378624	0.081617233	0.282447037	lincRNA	4732487G21Rik	94.44316076	86.41753536	38.8554595	71.79090252	-362512.8481	-343876.6653	-152058.4074	-275096.5841	NA
ENSMUSG00000097640	54.20364375	0.785983019	0.458705546	1.713480525	0.086624173	0.29859862	processed_transcript	Gm20033	69.53507441	67.96884804	51.21856025	28.09209229	-276697.1935	-265991.8303	-196265.1321	-107829.3473	NA
ENSMUSG00000000782	89.48687662	-0.634268196	0.370837627	-1.710366341	0.087198151	0.299293823	protein_coding	Tcf7	70.57291134	69.91081513	134.227951	83.23582901	124.9230438	121.704447	228.8033814	142.1238267	NA
ENSMUSG00000103253	149.7069939	-0.473781965	0.27727654	-1.708698348	0.08750684	0.299293823	TEC	Gm37520	122.4647579	128.1698277	171.3172532	176.8761366	-487317.4453	-501584.5942	-656473.0282	-678925.5202	NA
ENSMUSG00000048731	68.28823056	0.674526237	0.396336813	1.70190155	0.088773825	0.302450358	protein_coding	Ggnbp1	87.17830224	80.5916341	45.03700987	60.34597603	299.87413	277.6883506	160.8737511	211.9929965	NA
ENSMUSG00000106457	98.95711032	0.574310837	0.338345786	1.697407981	0.089619555	0.304152851	TEC	Gm42585	133.8809642	102.9242556	76.82784037	82.19538114	-532745.3428	-402787.6287	-294397.6982	-315500.6829	NA
ENSMUSG00000020700	50.83907443	0.760968756	0.449641876	1.692388537	0.090571916	0.306202748	protein_coding	Map3k3	71.61074827	56.31704552	37.97238087	37.45612305	79.51182508	64.82481916	42.98598049	41.51826804	NA
ENSMUSG00000050350	79.38445435	-0.610640155	0.364864215	-1.673609333	0.094207403	0.317273208	protein_coding	Gpr18	67.45940054	58.2590126	97.13864875	94.68075549	187.0467727	161.810972	279.6950919	268.1094119	NA
ENSMUSG00000023084	61.93134866	0.704124065	0.422698803	1.66578202	0.095756839	0.321260539	protein_coding	Lrrc71	91.32964997	62.14294678	43.27085262	50.98194527	88.30273931	62.28768171	42.65435061	49.20867602	NA
ENSMUSG00000021675	51.63657862	-0.77348369	0.466275974	-1.658853839	0.097145248	0.324679366	protein_coding	F2rl2	40.47564033	35.92639111	81.2432335	48.90104954	64.73443715	59.56665082	132.4751277	78.07692908	NA
ENSMUSG00000070953	48.53825324	0.756384766	0.459094212	1.647558922	0.099443216	0.331100707	protein_coding	Rabepk	55.00535737	66.9978645	38.8554595	33.2943316	183.3554985	231.5249763	132.0524598	110.7955055	NA
ENSMUSG00000037982	99.79021576	0.553366632	0.336519843	1.644380393	0.100097653	0.332022025	lincRNA	Gm9725	116.2377363	121.3729429	91.840177	69.71000679	215.9377181	221.748558	164.2967718	124.9190143	NA
ENSMUSG00000040044	57.34702919	0.696853247	0.424618046	1.641129606	0.100770514	0.332997301	protein_coding	Orc3	75.76209599	66.02688095	39.73853812	47.86060168	126.9964379	110.8657619	69.17298085	81.93327534	NA
ENSMUSG00000108531	54.79560318	0.759609515	0.466755271	1.627425679	0.103646721	0.341218981	antisense	RP23-144N15.7	78.87560679	59.22999615	52.9847175	28.09209229	-302244.5636	-227349.8094	-210839.2456	-109936.6439	NA
ENSMUSG00000026729	235.8236092	0.377281999	0.232829182	1.620424016	0.105141224	0.344847523	lincRNA	4930562F07Rik	270.8754391	262.1655567	208.4065555	201.8468853	1272.573911	1205.997526	960.3272761	964.2238764	NA
ENSMUSG00000056687	69.20771786	0.667007652	0.414918326	1.607563728	0.107930762	0.35137459	antisense	Gm11696	94.44316076	75.73671639	67.1139755	39.53701878	135.4829161	106.3843859	94.43250037	57.6713853	NA
ENSMUSG00000086247	70.45195006	0.636287565	0.395669208	1.608130104	0.107806687	0.35137459	processed_transcript	Gm15787	88.21613917	83.50458473	65.34781825	44.73925809	-345228.3361	-319982.4102	-250832.6015	-178028.5311	NA
ENSMUSG00000030720	45.10884588	-0.749937484	0.470819069	-1.592835833	0.111197024	0.355426124	protein_coding	Cln3	34.24861874	33.01344048	53.86779612	59.30552817	82.07490371	79.24925946	134.0545547	145.1460103	NA
ENSMUSG00000036168	579.4799521	-0.314993067	0.197153705	-1.597703005	0.11010909	0.355426124	protein_coding	Ccdc38	455.6104129	576.7642248	586.364207	699.1809636	464.7424176	609.9088379	609.8059004	711.9855209	NA
ENSMUSG00000085853	218.7676415	0.408808165	0.256470268	1.593978778	0.110940788	0.355426124	antisense	Gm12167	288.5186669	210.7034289	185.4465112	190.4019589	-1148086.863	-824574.6739	-710615.1336	-730843.3541	NA
ENSMUSG00000086740	88.08565594	-0.613847848	0.385025319	-1.594305148	0.110867705	0.355426124	antisense	Gm17029	70.57291134	68.93983158	136.8771869	75.95269397	-270429.3464	-264620.2699	-544668.0512	-297236.1113	NA
ENSMUSG00000096944	88.81168102	0.5664552	0.354889412	1.596145674	0.110456273	0.355426124	lincRNA	Gm26722	93.40532383	118.4599923	65.34781825	78.03358969	-371682.7973	-463585.7613	-250407.2376	-299525.9648	NA
ENSMUSG00000027637	53.36481415	0.695200752	0.4398595	1.580506393	0.113990944	0.363036376	protein_coding	1110008F13Rik	73.68642213	58.2590126	38.8554595	42.65836237	279.8414795	221.6281103	153.2363199	165.4517638	NA
ENSMUSG00000039849	169.3577243	0.415030527	0.263416557	1.575567352	0.115125545	0.364012066	protein_coding	Pcif1	190.9619954	196.1386758	145.7079731	144.6222529	279.4756208	281.0720237	209.1581559	215.2159975	NA
ENSMUSG00000079419	65.33155995	0.626262784	0.397179919	1.576773531	0.114847644	0.364012066	protein_coding	Ms4a6c	78.87560679	79.62065056	47.68624575	55.14373672	398.8906232	417.4310751	245.87238	278.4006217	NA
ENSMUSG00000042087	70.75663475	-0.702114085	0.44716355	-1.570150528	0.116380096	0.366659871	TEC	4933440N22Rik	47.74049885	60.20097969	120.9817716	54.10328885	291.3668827	361.338595	711.0303338	318.5143184	NA
ENSMUSG00000098912	210.7841993	-0.396205061	0.253030131	-1.565841425	0.117385745	0.368507394	processed_transcript	1500004A13Rik	166.053909	198.0806429	260.5081944	218.4940511	-636304.3444	-760317.3952	-1036626.291	-855062.786	NA
ENSMUSG00000028702	49.03765812	0.736913682	0.471803702	1.561907376	0.118309811	0.37008656	protein_coding	Rad54l	50.85400964	71.85278221	43.27085262	30.17298801	70.54580236	98.02731861	57.80379914	40.3753552	NA
ENSMUSG00000043488	72.44100959	0.590834318	0.380202305	1.553999832	0.120184457	0.374617509	antisense	Frmd8os	79.91344372	94.18540371	57.40011062	58.2650803	669.6707868	772.8273939	471.790008	496.4691868	NA
ENSMUSG00000030532	51.866048	0.698357992	0.453876707	1.538651314	0.123889444	0.383446554	protein_coding	Hddc3	66.42156361	62.14294678	47.68624575	31.21343588	294.5853446	276.0774856	219.6242142	141.3794289	NA
ENSMUSG00000108880	125.7028507	0.464929392	0.30184445	1.540294653	0.123488547	0.383446554	TEC	RP24-439I22.4	136.9944749	154.3863834	98.02172737	113.408817	-524951.0841	-592600.3228	-390052.6044	-443818.3032	NA
ENSMUSG00000004018	60.49929734	0.668429016	0.435051019	1.536438228	0.124430937	0.383771206	protein_coding	Fancl	70.57291134	77.67868347	34.44006637	59.30552817	187.8441488	203.3382362	88.27517188	152.2673801	NA
ENSMUSG00000039942	50.48948135	-0.701399241	0.460163959	-1.524237671	0.127449351	0.391706221	protein_coding	Ptger4	31.13510794	45.63622654	56.517032	68.66955893	36.2911223	53.28400444	68.40918489	81.74418813	NA
ENSMUSG00000064352	106.5543643	-0.501334964	0.331903449	-1.510484346	0.130919881	0.400970645	Mt_tRNA	mt-Ts1	101.7080193	74.76573284	116.5663785	133.1773264	5686.113772	4092.798271	6391.873243	7570.648497	NA
ENSMUSG00000029821	114.436055	0.480806198	0.320622461	1.499602353	0.133717438	0.40572873	protein_coding	Dfna5	125.5782687	140.7926138	82.12631212	109.2470256	192.1174086	223.2955359	128.0973214	166.8494367	NA
ENSMUSG00000060802	124.3536213	-0.463427901	0.309145748	-1.499059603	0.13385817	0.40572873	protein_coding	B2m	92.3674869	116.5180252	132.4617937	156.0671794	541.2908896	707.8685965	791.421274	913.0321412	NA
ENSMUSG00000108677	59.38356708	0.646817792	0.430600881	1.502128351	0.133063964	0.40572873	antisense	RP24-159C12.10	83.02695451	62.14294678	53.86779612	38.49657092	-324920.787	-238126.4448	-206767.4147	-153187.3407	NA
ENSMUSG00000072898	55.02853533	-0.698025053	0.466829463	-1.495246353	0.13485016	0.407330897	pseudogene	Gm10434	39.43780339	44.665243	89.19094112	46.82015382	329.6906232	367.215612	718.0084883	377.5537371	NA
ENSMUSG00000070284	69.2457793	0.586949774	0.394581229	1.487525838	0.136875984	0.412034213	protein_coding	Gmppb	95.48099769	70.88179867	56.517032	54.10328885	178.866035	137.6555106	107.9433213	101.1806564	NA
ENSMUSG00000086289	143.8333398	0.427755503	0.28887579	1.480759267	0.138670734	0.416012203	processed_transcript	Gm16933	176.4322783	153.4153999	111.2679067	134.2177743	-677221.8041	-610477.6755	-435439.9849	-514311.0051	NA
ENSMUSG00000097125	137.2970505	0.437517329	0.296811797	1.474056401	0.140466406	0.419965887	lincRNA	Gm26885	143.2214965	172.8350707	128.0464006	105.0852341	-548812.497	-663414.1978	-509528.1769	-411244.4828	NA
ENSMUSG00000039206	91.94712702	0.514402509	0.351496892	1.463462466	0.143340877	0.420030304	protein_coding	Daglb	98.59450849	117.4890088	65.34781825	86.35717259	136.9395608	160.4837271	87.40217716	115.6982203	NA
ENSMUSG00000040940	55.6984686	-0.648347225	0.442897123	-1.463877707	0.143227366	0.420030304	protein_coding	Arhgef1	52.9296835	33.98442402	72.41244725	63.46731962	63.93117336	40.19302454	85.78692577	77.9481797	NA
ENSMUSG00000047515	48.93722606	0.697187275	0.476412609	1.463410627	0.143355052	0.420030304	protein_coding	BC049715	73.68642213	47.57819363	43.27085262	31.21343588	252.7611212	169.1915595	151.3295549	106.8875876	NA
ENSMUSG00000049775	70.75839418	-0.561909006	0.382890096	-1.467546462	0.14222746	0.420030304	protein_coding	Tmsb4x	55.00535737	59.22999615	80.36015487	88.43806832	320.3279849	345.5164276	485.9769846	525.9830425	NA
ENSMUSG00000073411	157.6742242	-0.401261352	0.273849595	-1.465261803	0.142849504	0.420030304	protein_coding	H2-D1	131.8052903	139.8216303	168.6680174	190.4019589	356.0568018	378.3536355	473.1558679	525.2916053	NA
ENSMUSG00000090758	53.42501868	0.640830716	0.436961427	1.466561292	0.142495436	0.420030304	antisense	Gm17178	60.19454202	69.91081513	38.8554595	44.73925809	-235567.5705	-267892.2504	-149143.709	-178028.5311	NA
ENSMUSG00000000441	67.68771844	0.577518429	0.396246372	1.457473101	0.144985831	0.420913531	protein_coding	Raf1	91.32964997	70.88179867	56.517032	52.02239313	122.3647069	93.39780476	72.9186605	67.23366213	NA
ENSMUSG00000023988	142.1964218	-0.41412923	0.283619428	-1.460158187	0.144246604	0.420913531	protein_coding	Bysl	121.426921	122.3439265	155.421838	169.5930016	277.2682615	289.611319	361.8284532	386.594791	NA
ENSMUSG00000031320	57.23337993	0.639859613	0.439397991	1.456218797	0.145332145	0.420913531	protein_coding	Rps4x	84.06479145	55.34606197	40.62161675	48.90104954	355.1588471	234.224504	178.2176644	210.9935997	NA
ENSMUSG00000034799	49.14334937	0.655957194	0.450720733	1.45535172	0.145571915	0.420913531	protein_coding	Unc13a	58.11886816	62.14294678	38.8554595	37.45612305	43.54123997	45.78603606	28.0317782	27.06814706	NA
ENSMUSG00000039452	868.9706849	0.239071095	0.165441933	1.445045345	0.148445149	0.426415968	protein_coding	Snx22	922.637032	959.3317409	846.8724013	747.0415653	1382.307443	1490.014584	1293.591767	1117.329913	NA
ENSMUSG00000085714	91.16175703	0.5205615	0.360155976	1.445377931	0.148351759	0.426415968	antisense	Gm13008	122.4647579	92.24343662	63.581661	86.35717259	-479258.1608	-353468.9415	-244053.342	-343636.467	NA
ENSMUSG00000020652	82.14858718	0.51406813	0.358204692	1.435123945	0.151251781	0.433062918	protein_coding	Cenpo	91.32964997	101.9532721	69.76321137	65.54821534	266.6347612	292.7276195	196.1310679	184.5941382	NA
ENSMUSG00000029624	46.76199048	0.671013863	0.468883222	1.431089515	0.152404562	0.433306206	protein_coding	Ptcd1	64.34588975	50.49114426	32.67390912	39.53701878	117.3994265	90.59785927	57.40651939	69.58267866	NA
ENSMUSG00000044066	56.8545078	0.60621935	0.423566363	1.431226374	0.152365347	0.433306206	protein_coding	Cep68	64.34588975	72.82376576	42.387774	47.86060168	110.6517499	123.1595708	70.19287651	79.39034503	NA
ENSMUSG00000072612	174.2642804	0.431608919	0.301896925	1.429656562	0.152815613	0.433306206	protein_coding	Gm10382	237.6646573	163.1252353	176.615725	119.6515042	753.7161691	506.549366	549.372731	385.8369657	NA
ENSMUSG00000005501	64.79171364	0.568705648	0.403230618	1.410373178	0.158429521	0.438117989	protein_coding	Usp40	84.06479145	70.88179867	57.40011062	46.82015382	70.90668596	59.88869954	50.27716988	40.33188199	NA
ENSMUSG00000010492	48.69473726	0.64439127	0.457479369	1.408569027	0.158962643	0.438117989	antisense	Uckl1os	64.34588975	54.37507843	34.44006637	41.6179145	135.7070196	118.8856233	74.05441921	87.62433004	NA
ENSMUSG00000025450	77.23583004	0.531264481	0.37416684	1.419859874	0.15564848	0.438117989	processed_transcript	Gm9752	88.21613917	94.18540371	54.75087475	71.79090252	127.2494934	140.8443921	80.52015016	103.3809035	NA
ENSMUSG00000040714	47.60166335	-0.656223786	0.464933167	-1.411436811	0.158115855	0.438117989	protein_coding	Klc3	31.13510794	42.72327591	58.28318925	58.2650803	65.23076248	89.6610314	126.8032642	124.6674374	NA
ENSMUSG00000048721	97.93712117	-0.47507937	0.337718637	-1.406731279	0.159507087	0.438117989	protein_coding	Fndc9	71.61074827	92.24343662	116.5663785	111.3279213	123.7281142	156.0569278	197.5413364	195.5855313	NA
ENSMUSG00000049939	46.88248005	0.64895948	0.462215354	1.404019736	0.160312973	0.438117989	protein_coding	Lrrc4	58.11886816	56.31704552	33.55698775	39.53701878	62.89948863	59.6797817	35.6211091	43.50872209	NA
ENSMUSG00000050022	54.45643555	0.616056682	0.43902751	1.403230248	0.16054819	0.438117989	protein_coding	Amz1	69.53507441	62.14294678	36.20622362	49.9414974	103.3223277	90.81125114	51.80699968	71.58200801	NA
ENSMUSG00000063457	66.69772576	0.570372997	0.406902842	1.401742475	0.160992162	0.438117989	protein_coding	Rps15	81.98911758	77.67868347	64.46473962	42.65836237	633.4178831	601.1364605	517.1796011	336.5742533	NA
ENSMUSG00000078489	46.91974048	0.682417681	0.482285446	1.414966357	0.15707836	0.438117989	processed_transcript	Gm17106	58.11886816	57.28802906	26.49235875	45.77970595	1628.35642	1663.964837	756.7604883	1280.466487	NA
ENSMUSG00000085105	80.27063376	0.54189867	0.381870739	1.419063086	0.155880625	0.438117989	antisense	Gm12758	76.79993293	113.6050746	72.41244725	58.2650803	-294290.7593	-436064.3884	-288146.969	-228016.7429	NA
ENSMUSG00000085408	129.097814	0.418899606	0.296001088	1.415196168	0.157010988	0.438117989	processed_transcript	C530005A16Rik	140.1079857	155.3573669	114.8002212	106.125682	-536881.7906	-596327.3688	-456818.3655	-415316.2104	NA
ENSMUSG00000087519	46.47722573	0.68064008	0.482269656	1.411326779	0.158148282	0.438117989	processed_transcript	AV039307	62.27021589	52.43311134	44.15393125	27.05164443	-247788.5315	-205193.6976	-169194.0794	-103835.6678	NA
ENSMUSG00000097748	93.98612756	0.480944177	0.34158159	1.407992093	0.159133411	0.438117989	lincRNA	Gm26533	99.63234542	119.4309758	83.00939075	73.87179824	-389904.9444	-457649.2612	-318625.1965	-293954.0862	NA
ENSMUSG00000096221	60.15555301	0.593790954	0.424740485	1.398008842	0.162110412	0.439799544	antisense	1500002C15Rik	59.15670509	85.44655182	45.03700987	50.98194527	-226683.4227	-327980.0528	-179213.3588	-199514.6501	NA
ENSMUSG00000018661	59.7097992	0.579790567	0.416818609	1.390990121	0.164228423	0.444174718	protein_coding	Cog1	67.45940054	75.73671639	52.9847175	42.65836237	90.90845021	99.93684733	70.03367252	58.45321428	NA
ENSMUSG00000090952	134.7314789	0.42551069	0.306999761	1.386029383	0.165737932	0.446882337	processed_transcript	Gm17251	158.7890505	150.5024492	135.9941082	93.64030763	-609499.6237	-598886.3272	-532204.426	-358821.6315	NA
ENSMUSG00000079469	185.2680202	0.362712384	0.262467628	1.381931886	0.166992616	0.448888409	protein_coding	Pigb	196.15118	220.4132644	146.5910517	177.9165845	360.4170894	419.8557614	274.6169942	326.3576352	NA
ENSMUSG00000029363	50.82255254	0.615787098	0.44724596	1.37684217	0.16856105	0.45068351	protein_coding	Rfc5	55.00535737	67.96884804	39.73853812	40.57746664	174.1287745	211.6084569	121.1413457	123.9089114	NA
ENSMUSG00000097445	50.74243878	0.62263976	0.453444938	1.373132014	0.16971131	0.45068351	lincRNA	Gm26631	53.96752043	68.93983158	35.323145	44.73925809	-207150.1989	-274328.5757	-138234.9159	-171437.0017	NA
ENSMUSG00000104523	48.42524183	0.667737789	0.485920462	1.374170962	0.169388613	0.45068351	antisense	Gm37335	47.74049885	70.88179867	28.258516	46.82015382	-182937.499	-272074.362	-112447.5977	-183227.7399	NA
ENSMUSG00000106767	193.6028636	0.366957607	0.266891331	1.374932658	0.169152323	0.45068351	TEC	Gm42727	207.5673863	228.1811327	143.0587372	195.6041982	-812301.9674	-874370.5396	-549120.0195	-778357.2986	NA
ENSMUSG00000102349	17262.9409	-0.545460766	0.397731257	-1.371430473	0.170240803	0.45072791	TEC	Gm37376	14628.31155	13447.15109	14903.71795	26072.58299	-56054435.84	-51615860.82	-59305565.8	-102033420.7	NA
ENSMUSG00000097078	68.77972061	0.531757368	0.388817631	1.367626686	0.171428959	0.452510676	protein_coding	Gm26566	80.95128065	81.56261765	51.21856025	61.38642389	-310725.2983	-324557.7515	-200440.628	-235227.514	NA
ENSMUSG00000020696	96.42824249	0.473577383	0.351281697	1.348141355	0.177612923	0.460094741	protein_coding	Rffl	99.63234542	124.2858936	67.1139755	94.68075549	110.8314225	135.3760346	73.22679392	107.0943872	NA
ENSMUSG00000023927	47.65115066	-0.620624548	0.458026592	-1.35499676	0.175418589	0.460094741	protein_coding	Satb1	35.28645567	39.81032528	58.28318925	57.22463244	39.28629714	43.39964544	63.64596401	64.78262072	NA
ENSMUSG00000030887	99.99489135	0.46747094	0.347872327	1.343800305	0.179012971	0.460094741	protein_coding	Pdzd9	116.2377363	115.5470417	66.23089687	101.9638905	275.1161464	273.9459423	162.7850877	246.4665226	NA
ENSMUSG00000038957	147.2662594	0.376913126	0.278994514	1.35096967	0.176705149	0.460094741	protein_coding	Edc3	160.8647244	171.8640872	126.2802434	130.0559828	189.6091153	199.2237388	143.3338469	147.8702433	NA
ENSMUSG00000039585	108.7462405	0.441193103	0.327779266	1.346006745	0.178300341	0.460094741	protein_coding	Myo9a	131.8052903	118.4599923	78.59399762	106.125682	109.5839705	96.43691002	64.091151	89.71749235	NA
ENSMUSG00000078700	46.7818192	0.623527952	0.460595314	1.353743586	0.175818197	0.460094741	processed_transcript	D030028A08Rik	58.11886816	55.34606197	36.20622362	37.45612305	236.4716729	221.4655905	141.8600666	147.0066085	NA
ENSMUSG00000086090	71.75933532	0.519662483	0.384401215	1.351875235	0.176415231	0.460094741	antisense	Gm12531	75.76209599	93.21442017	55.63395337	62.42687175	-290313.8571	-357796.4213	-221381.2079	-244303.6532	NA
ENSMUSG00000086453	101.5045133	0.449399984	0.333981544	1.345583286	0.178436945	0.460094741	antisense	Gm11457	123.5025948	110.6921239	75.06168312	96.76165122	-491447.2542	-433186.695	-287629.935	-371412.1963	NA
ENSMUSG00000107608	147.2969947	0.386954887	0.28765354	1.345211629	0.178556902	0.460094741	TEC	Gm43863	146.3350073	187.3998239	125.3971647	130.0559828	-572672.887	-718100.0602	-481327.4245	-517524.7996	NA
ENSMUSG00000013997	105.0061618	0.435254482	0.324682142	1.340555656	0.180064763	0.461347922	protein_coding	Nit1	113.1242255	128.1698277	83.00939075	95.72120336	197.2824562	231.7216373	147.5929361	166.6494528	NA
ENSMUSG00000053706	171.3671714	0.354930595	0.265058984	1.339062684	0.180550267	0.461347922	protein_coding	B430305J03Rik	201.3403647	183.5158897	158.0710739	142.5413572	1481.076895	1321.836762	1140.495724	1066.178911	NA
ENSMUSG00000026749	181.046604	-0.353141643	0.264562543	-1.33481346	0.181937407	0.463493555	protein_coding	Nek6	143.2214965	174.7770378	213.7050272	192.4828546	244.0056629	308.6910324	371.2033914	327.3758536	NA
ENSMUSG00000078143	117.9816955	0.415629955	0.312114112	1.331660245	0.182971858	0.463493555	antisense	Gm17344	128.6917795	140.7926138	90.07401975	112.3683692	459.0950044	491.8005712	315.1706787	407.6038531	NA
ENSMUSG00000085913	55.05999743	0.598875037	0.449308594	1.332881331	0.18257075	0.463493555	antisense	Gm15601	51.89184657	80.5916341	38.8554595	48.90104954	-203075.4919	-308820.2331	-149143.709	-194589.3247	NA
ENSMUSG00000002820	84.25464014	0.480941859	0.361699535	1.329672317	0.18362626	0.463748451	protein_coding	Atg4d	90.29181303	105.8372062	61.81550375	79.07403756	184.1330671	211.3387709	123.6446496	163.9682533	NA
ENSMUSG00000022587	50.04901378	0.621845249	0.468203116	1.328152733	0.184127656	0.463748451	protein_coding	Ly6e	74.72425906	46.60721008	36.20622362	42.65836237	266.5587071	163.5090972	124.3739535	146.7869662	NA
ENSMUSG00000035953	86.22853915	0.479138005	0.362520305	1.321685981	0.186272739	0.466477884	protein_coding	Tmem55b	85.10262838	115.5470417	66.23089687	78.03358969	201.9232053	274.6244462	163.1882706	189.0895148	NA
ENSMUSG00000097417	818.7817979	0.216904206	0.163930209	1.323149692	0.185785602	0.466477884	lincRNA	Gm26669	870.7451855	889.4209258	729.4229442	785.5381362	-3407606.753	-3408184.742	-2799834.173	-3125849.79	NA
ENSMUSG00000028465	82.24031582	-0.474539719	0.359677008	-1.319349608	0.18705226	0.467099253	protein_coding	Tln1	73.68642213	64.08491387	100.6709632	90.51896404	36.81849709	33.19573834	51.2847579	45.1524226	NA
ENSMUSG00000089745	60.46568774	-0.570473069	0.433253987	-1.316717414	0.187933364	0.467970049	antisense	1810008B01Rik	51.89184657	45.63622654	89.19094112	55.14373672	-199182.8835	-181597.7895	-349043.1625	-211306.0719	NA
ENSMUSG00000058586	53.71537634	0.567893474	0.432916816	1.311784281	0.18959293	0.470768886	protein_coding	Serhl	63.30805282	65.05589741	45.9200885	40.57746664	144.6447131	154.0913361	106.9674944	92.5531986	NA
ENSMUSG00000035640	80.79754727	-0.467729336	0.359932698	-1.299491094	0.193775448	0.474452977	protein_coding	Cbarp	70.57291134	65.05589741	91.840177	95.72120336	100.6187755	91.21898259	126.0923272	131.6440404	NA
ENSMUSG00000087541	67.26386035	0.516140868	0.396311206	1.302362536	0.192792483	0.474452977	antisense	Hopxos	78.87560679	79.62065056	62.69858237	47.86060168	-308674.7476	-305099.5074	-240663.7122	-190449.1263	NA
ENSMUSG00000097860	88.34063141	0.47947596	0.367376623	1.305134648	0.191847002	0.474452977	lincRNA	Gm26857	85.10262838	120.4019594	63.581661	84.27627687	-338644.3264	-471185.5279	-243639.4744	-323488.042	NA
ENSMUSG00000107086	62.17278275	-0.549209655	0.421994773	-1.3014608	0.193100774	0.474452977	TEC	Gm43808	46.70266191	54.37507843	88.3078625	59.30552817	-178960.5969	-208714.5791	-351398.7427	-232088.4705	NA
ENSMUSG00000108477	84.54214466	0.527696021	0.405589947	1.30105794	0.193238623	0.474452977	TEC	RP23-179K11.8	121.426921	78.64966702	89.19094112	48.90104954	-466087.9475	-312966.4032	-349043.1625	-187384.6298	NA
ENSMUSG00000022721	53.42326683	0.581683936	0.449166686	1.295029114	0.195310186	0.476882372	protein_coding	Trmt2a	62.27021589	66.02688095	52.10163887	33.2943316	99.57069788	109.4510425	84.93917971	53.14768779	NA
ENSMUSG00000072683	55.48785242	0.591776153	0.458044321	1.291962647	0.196370081	0.478142107	processed_transcript	Gm7457	78.87560679	54.37507843	33.55698775	55.14373672	122.7729047	87.74202528	53.25351584	85.6877826	NA
ENSMUSG00000012126	251.9159924	0.30324739	0.23574769	1.286321791	0.198330781	0.481582199	protein_coding	Ubxn11	280.2159715	276.7303099	249.9112509	200.8064375	696.7011792	673.7019216	609.4442308	507.6609216	NA
ENSMUSG00000079429	58.82198674	0.535353208	0.418519085	1.2791608	0.200840437	0.486332628	protein_coding	Mroh2a	64.34588975	74.76573284	44.15393125	52.02239313	33.4280645	38.03210924	22.4985381	27.48040885	NA
ENSMUSG00000102154	51.38535693	-0.55889582	0.44279221	-1.262207888	0.206873991	0.499566588	antisense	Gm37469	38.39996646	44.665243	60.0493465	62.42687175	-150275.864	-171153.3822	-230494.823	-248411.9038	NA
ENSMUSG00000036138	48.35198326	0.575985659	0.456904122	1.26062697	0.207443277	0.499568878	protein_coding	Acaa1a	63.30805282	52.43311134	37.08930225	40.57746664	153.9372688	125.3856998	86.84572363	95.17476425	NA
ENSMUSG00000078786	66.05253551	0.494730065	0.396436279	1.247943469	0.21205176	0.509271851	protein_coding	BC024978	75.76209599	78.64966702	49.452403	60.34597603	118.254117	122.9697476	80.15612868	96.19560002	NA
ENSMUSG00000060036	61.97569892	0.506274058	0.408352733	1.239795936	0.215050882	0.515067371	protein_coding	Rpl3	74.72425906	70.88179867	56.517032	45.77970595	220.4637604	216.7994936	170.0045084	134.8377469	NA
ENSMUSG00000031910	99.07618778	0.406176137	0.329599524	1.232332291	0.217824982	0.517481512	protein_coding	Has3	116.2377363	109.7211404	89.19094112	81.15493328	75.28956069	71.18935163	59.99200982	53.68403467	NA
ENSMUSG00000063235	55.27956673	0.57181694	0.463034295	1.234934316	0.216854951	0.517481512	processed_transcript	Ptpmt1	73.68642213	58.2590126	30.90775187	58.2650803	268.0944973	219.7411994	114.6498117	211.6272919	NA
ENSMUSG00000100130	211.6353757	0.304881126	0.247293637	1.232870889	0.217623938	0.517481512	antisense	Gm28379	254.2700482	213.6163796	187.2126685	191.4424067	-974341.0273	-819950.1321	-744965.3345	-749197.8697	NA
ENSMUSG00000103975	86.3011413	0.463773447	0.377473167	1.228626264	0.219211964	0.51937282	TEC	Gm37676	101.7080193	98.06933788	53.86779612	91.55941191	-389736.4109	-376431.6516	-214353.233	-358312.0246	NA
ENSMUSG00000074646	91.9217966	-0.426534109	0.347904779	-1.226008192	0.220195592	0.520300875	protein_coding	6430550D23Rik	67.45940054	89.33048599	106.8525136	104.0447863	243.8781888	316.21872	378.8870206	382.4663646	NA
ENSMUSG00000039646	144.0932303	0.374608525	0.307056987	1.219996744	0.222466109	0.524256595	protein_coding	Vasn	158.7890505	167.0091695	152.7726021	97.80209908	258.0610486	265.7661215	243.5240643	161.6190404	NA
ENSMUSG00000025159	63.31160416	0.505192257	0.415704452	1.215267853	0.224263948	0.524418138	protein_coding	Mms19	60.19454202	88.35950245	54.75087475	49.9414974	59.94217062	86.53387872	52.50266729	47.97212649	NA
ENSMUSG00000031577	219.6072843	-0.307647067	0.2533819	-1.214163546	0.224685278	0.524418138	protein_coding	Tti2	195.1133431	197.1096593	208.4065555	277.7995793	293.1485994	291.2502578	301.5276779	402.6099432	NA
ENSMUSG00000035597	141.5243169	0.379337905	0.312586309	1.213546128	0.22492109	0.524418138	protein_coding	Prpf39	138.0323119	181.5739226	99.78788462	146.7031486	167.5413324	220.7657942	125.7778205	181.8541606	NA
ENSMUSG00000099757	190.2364042	-0.375614472	0.308645952	-1.216975212	0.223613647	0.524418138	processed_transcript	BE692007	144.2593335	186.4288403	154.5387594	275.7186836	-574043.4314	-729577.5916	-592179.278	-1058325.076	NA
ENSMUSG00000102644	77.12339726	-0.464435655	0.383240486	-1.211864799	0.225564139	0.524526132	unitary_pseudogene	Thap6	51.89184657	77.67868347	93.60633425	85.31672473	-199182.8835	-309102.6205	-366322.527	-326926.3754	NA
ENSMUSG00000085664	57.63166269	0.505819121	0.418529046	1.208563959	0.22683041	0.526078972	processed_transcript	Atxn7l1os2	65.38372668	69.91081513	49.452403	45.77970595	-250544.8356	-268347.316	-196783.2959	-179156.0123	NA
ENSMUSG00000048827	46.87260702	0.557446828	0.462244702	1.205956123	0.227834409	0.527016962	protein_coding	Pkd1l3	59.15670509	52.43311134	35.323145	40.57746664	34.86537059	30.25891383	20.41945633	24.31743034	NA
ENSMUSG00000020288	190.679826	0.308044972	0.256111295	1.202777772	0.229062329	0.527115003	protein_coding	Ahsa2	200.3025278	221.3842479	158.9541525	182.078376	221.2499958	240.4922665	169.0766651	194.0024755	NA
ENSMUSG00000073436	79.31815491	0.439423759	0.365682284	1.201654493	0.229497419	0.527115003	protein_coding	Eme2	89.2539761	93.21442017	60.93242512	73.87179824	228.4433263	233.6099851	152.9656329	192.252509	NA
ENSMUSG00000086953	103.1136969	0.398886947	0.332344806	1.200220193	0.230053835	0.527115003	antisense	Aknaos	131.8052903	102.9242556	94.48941287	83.23582901	-524485.7251	-402787.6287	-362075.33	-319494.3624	NA
ENSMUSG00000105692	58.27901017	0.517904431	0.431713125	1.199649493	0.230275496	0.527115003	TEC	Gm43737	62.27021589	74.76573284	38.8554595	57.22463244	-239019.4603	-297511.2722	-152058.4074	-219279.8859	NA
ENSMUSG00000097185	96.3234252	0.414586687	0.346084946	1.197933316	0.230942978	0.527269813	protein_coding	Gm26596	104.8215301	115.5470417	96.25557012	68.66955893	-401667.1174	-443518.4806	-383024.6295	-268734.0185	NA
ENSMUSG00000097410	75.27188672	0.44974614	0.376798748	1.193597754	0.232635353	0.528388825	lincRNA	Gm26668	88.21613917	85.44655182	55.63395337	71.79090252	-351033.753	-334389.7295	-213184.5401	-275563.8876	NA
ENSMUSG00000106933	54.33807012	-0.516794735	0.432705344	-1.194334071	0.232347315	0.528388825	TEC	Gm43621	45.66482498	43.69425945	58.28318925	69.71000679	-178706.4328	-167432.6565	-223715.5635	-277393.2926	NA
ENSMUSG00000087047	46.10761338	0.570641815	0.481065059	1.186205075	0.235541323	0.533610368	processed_transcript	1700110K17Rik	56.0431943	54.37507843	45.9200885	28.09209229	-219321.5312	-208360.6392	-176260.747	-111785.3567	NA
ENSMUSG00000057176	59.09946479	0.494796242	0.418339226	1.182763201	0.236903008	0.535315538	protein_coding	Ccdc189	64.34588975	73.7947493	44.15393125	54.10328885	136.8552228	153.6821485	92.10950408	117.0056069	NA
ENSMUSG00000022890	71.43537655	0.451382095	0.383654802	1.176531851	0.239382412	0.539531129	protein_coding	Atp5j	75.76209599	89.33048599	64.46473962	56.18418458	396.3772969	457.6293642	330.806112	298.8913281	NA
ENSMUSG00000002996	122.7708723	0.366563375	0.312899178	1.171506351	0.241395307	0.541292027	protein_coding	Hbp1	144.2593335	132.0537619	90.95709837	123.8132956	206.034066	188.9222003	134.9014927	180.5946995	NA
ENSMUSG00000097643	54.84427305	0.511541038	0.436086006	1.173027869	0.24078463	0.541292027	protein_coding	A130051J06Rik	73.68642213	55.34606197	47.68624575	42.65836237	-282360.0528	-212441.6251	-189755.3211	-166940.8297	NA
ENSMUSG00000021485	112.4211445	0.362680525	0.311018352	1.166106513	0.243571384	0.543551127	protein_coding	Mxd3	128.6917795	124.2858936	98.904806	97.80209908	378.523794	378.9763929	296.595988	287.1795092	NA
ENSMUSG00000085178	87.24742131	0.423084423	0.36287044	1.165937968	0.243639527	0.543551127	antisense	Kdm6bos	107.9350409	92.24343662	87.42478387	61.38642389	-429500.1213	-360988.9125	-335004.2773	-235627.0923	NA
ENSMUSG00000056342	58.18180229	0.50614465	0.434899759	1.163819109	0.244497326	0.544083924	protein_coding	Usp34	66.42156361	69.91081513	37.08930225	59.30552817	25.15208316	27.44461682	14.31920896	22.41934592	NA
ENSMUSG00000016831	47.93684102	0.528503536	0.455613774	1.159981471	0.24605635	0.544158044	protein_coding	Tox4	53.96752043	59.22999615	37.97238087	40.57746664	48.6986723	53.53816304	35.58258786	37.39488392	NA
ENSMUSG00000068922	119.2364359	-0.371300129	0.320294404	-1.159246382	0.24635577	0.544158044	protein_coding	Msto1	95.48099769	112.634091	155.421838	113.408817	212.185636	245.0903925	338.7704918	256.2644096	NA
ENSMUSG00000097414	295.2090038	0.256099478	0.22093393	1.159167714	0.246387829	0.544158044	lincRNA	B130046B21Rik	319.6537749	323.33752	292.2990249	245.5456956	-1226966.563	-1286639.658	-1143893.929	-940910.0559	NA
ENSMUSG00000030336	49.203082	-0.554467859	0.481558066	-1.151403949	0.24956609	0.546732024	protein_coding	Cd27	33.21078181	46.60721008	73.29552587	43.69881023	90.96559605	127.875776	208.4781676	122.2391402	NA
ENSMUSG00000030744	89.5144214	-0.396851249	0.345013294	-1.150249152	0.250041267	0.546732024	protein_coding	Rps3	76.79993293	77.67868347	95.3724915	108.2065777	329.0074416	344.9806032	416.556108	462.765993	NA
ENSMUSG00000047986	129.1301264	-0.352121461	0.305511562	-1.152563454	0.249089611	0.546732024	protein_coding	Palm3	97.55667155	129.1408113	136.8771869	152.9458358	158.0627169	205.7754387	213.5593022	239.0353791	NA
ENSMUSG00000086434	52.34531117	0.509521851	0.441737631	1.15344905	0.248726119	0.546732024	antisense	Gm15200	56.0431943	66.9978645	46.80316712	39.53701878	-215117.5142	-266601.0102	-183161.2635	-151502.4666	NA
ENSMUSG00000061232	101.3653853	-0.380968075	0.333283854	-1.143073899	0.25300791	0.551846037	protein_coding	H2-K1	98.59450849	77.67868347	120.9817716	108.2065777	269.2557115	207.7167174	324.0609042	300.4749709	NA
ENSMUSG00000087528	184.2685747	0.294468202	0.258103535	1.140891783	0.253914959	0.552453587	processed_transcript	9830144P21Rik	195.1133431	210.7034289	155.421838	175.8356888	-763563.8494	-807397.477	-596574.836	-699693.5291	NA
ENSMUSG00000022185	47.08436334	-0.52425105	0.461235345	-1.136623755	0.255695605	0.553587283	protein_coding	Acin1	39.43780339	37.86835819	60.0493465	50.98194527	41.79431019	41.6034035	64.88110352	53.9366217	NA
ENSMUSG00000058932	46.08170496	-0.536943219	0.471946073	-1.137721554	0.25523677	0.553587283	protein_coding	Gm2174	35.28645567	39.81032528	46.80316712	62.42687175	308.7092995	348.8787403	425.2085243	557.7708976	NA
ENSMUSG00000003573	98.15009752	-0.386016218	0.341927277	-1.128942451	0.258922111	0.553740703	protein_coding	Homer3	97.55667155	72.82376576	119.2156144	103.0043384	160.1434248	117.0530317	191.9463155	171.9293797	NA
ENSMUSG00000026575	60.82614541	-0.493308996	0.438117306	-1.125974686	0.260176235	0.553740703	protein_coding	Nme7	64.34588975	36.89737465	78.59399762	63.46731962	190.4792813	106.9497554	228.1974643	191.0378988	NA
ENSMUSG00000032086	166.721286	0.300390642	0.265911176	1.12966535	0.258617263	0.553740703	protein_coding	Bace1	179.5457891	188.3708074	143.9418159	155.0267315	169.6890054	178.3319607	141.2701814	149.6331003	NA
ENSMUSG00000059883	51.53624896	0.552955229	0.490300944	1.127787404	0.259409714	0.553740703	protein_coding	Irak4	59.15670509	63.11393032	25.60928012	58.2650803	103.7215386	110.847858	46.62806469	104.3316143	NA
ENSMUSG00000062480	240.202669	0.290651165	0.256185401	1.134534455	0.256570429	0.553740703	protein_coding	Acat3	254.2700482	273.8173592	175.7326464	256.9906221	497.534955	524.6223238	337.2681601	511.314502	NA
ENSMUSG00000093006	89.82934161	-0.392879461	0.346708812	-1.133168375	0.257143552	0.553740703	miRNA	Gm24157	76.79993293	78.64966702	111.2679067	92.59985977	-305605.8555	-307790.5465	-426369.0802	-355437.4782	NA
ENSMUSG00000097136	54.67960223	0.493192336	0.437799189	1.126526383	0.25994278	0.553740703	lincRNA	Gm26772	57.08103123	70.88179867	51.21856025	39.53701878	-227139.4872	-277391.4801	-196265.1321	-151759.8222	NA
ENSMUSG00000006014	65.07053941	-0.445851956	0.396560622	-1.124297097	0.260887009	0.553912274	protein_coding	Prg4	51.89184657	58.2590126	74.1786045	75.95269397	64.4275953	71.13666065	88.68831621	90.96368353	NA
ENSMUSG00000086322	77.17185955	0.418307244	0.373763026	1.1191777	0.263064337	0.557189282	protein_coding	E130218I03Rik	85.10262838	91.27245308	57.40011062	74.91224611	-326105.9765	-350342.3292	-228409.1828	-293164.3838	NA
ENSMUSG00000097479	869.7532216	-0.18458625	0.165189766	-1.117419404	0.263815042	0.557436111	lincRNA	Gm26582	764.8858185	863.2043701	905.1555906	945.7671071	-2993332.75	-3307725.148	-3474370.494	-3763440.343	NA
ENSMUSG00000040699	94.48102864	-0.377114782	0.340451933	-1.107688768	0.267996252	0.564912963	protein_coding	Limd2	77.83776986	86.41753536	97.13864875	116.5301606	323.7122612	351.9071066	396.2372715	492.7760047	NA
ENSMUSG00000089702	116.8620362	0.355794079	0.322864565	1.101991727	0.270465268	0.568753519	processed_transcript	Gm16568	107.9350409	154.3863834	104.2032777	100.9234427	-414300.3978	-614341.4582	-407793.0018	-386729.9806	NA
ENSMUSG00000024073	56.28628284	-0.47789377	0.434429301	-1.100049579	0.27131052	0.569169326	protein_coding	Birc6	45.66482498	48.54917717	76.82784037	54.10328885	11.23490817	11.96483485	19.62869381	13.59421077	NA
ENSMUSG00000005983	105.5137274	0.355973925	0.324048939	1.098519028	0.271977914	0.569210919	protein_coding	1700037C18Rik	123.5025948	113.6050746	100.6709632	84.27627687	567.2766087	510.9447265	453.5420088	393.610411	NA
ENSMUSG00000085337	90.33862801	0.377962102	0.345817694	1.092951889	0.274414924	0.572947074	processed_transcript	Gm15964	93.40532383	110.6921239	75.06168312	82.19538114	-371682.7973	-433186.695	-287629.935	-315500.6829	NA
ENSMUSG00000070717	65.41625773	0.449358711	0.412256382	1.089998193	0.27571394	0.57429515	protein_coding	Gm10300	87.17830224	64.08491387	63.581661	46.82015382	151.0247907	109.1825412	106.0685565	78.23925941	NA
ENSMUSG00000047369	110.8624741	0.35259019	0.324364907	1.087017068	0.277029267	0.575670746	protein_coding	Dnah14	107.9350409	140.7926138	104.2032777	90.51896404	287.5795924	368.9207077	267.357233	232.641526	NA
ENSMUSG00000063179	114.6932826	0.352893637	0.325776765	1.083237588	0.27870298	0.576423339	protein_coding	Pstk	130.7674534	126.2278606	82.12631212	119.6515042	451.8391985	436.894488	294.6806409	422.2260311	NA
ENSMUSG00000074129	59.04172198	-0.470685232	0.434021147	-1.084475343	0.278154094	0.576423339	protein_coding	Rpl13a	59.15670509	39.81032528	59.16626787	78.03358969	202.3654377	133.3476868	198.5185256	271.4290907	NA
ENSMUSG00000032815	55.08832441	0.467083025	0.431969161	1.081287896	0.27956907	0.576857306	protein_coding	Fanca	71.61074827	56.31704552	47.68624575	44.73925809	72.94427525	56.41705639	46.77578543	43.95961086	NA
ENSMUSG00000086753	78.84964845	0.393004719	0.366360523	1.072726712	0.283393752	0.583379643	sense_overlapping	Gm15751	95.48099769	83.50458473	63.581661	72.83135038	-366496.5057	-332285.317	-248822.8485	-279083.4912	NA
ENSMUSG00000029616	101.5426908	0.353566309	0.330122793	1.071014532	0.284162895	0.583596227	protein_coding	Erp29	118.3134102	109.7211404	98.02172737	80.11448542	401.3583513	385.866064	339.020673	271.3140436	NA
ENSMUSG00000026083	79.62971238	0.391768527	0.366554919	1.068785349	0.285166403	0.584132605	protein_coding	Eif5b	90.29181303	90.30146954	60.93242512	76.99314183	44.23865072	44.31853767	31.00180699	38.52548765	NA
ENSMUSG00000101503	45.87246934	0.508534353	0.476385744	1.067484406	0.285753152	0.584132605	antisense	Gm28364	45.66482498	62.14294678	42.387774	33.2943316	-175280.9375	-247282.0964	-165881.899	-127581.0245	NA
ENSMUSG00000020359	874.375007	0.189089316	0.178659532	1.05837799	0.28988315	0.585838897	protein_coding	Phykpl	906.0316411	956.4187903	715.2936862	919.7559105	2414.350194	2552.948793	1979.367049	2503.064782	NA
ENSMUSG00000051166	90.88779217	0.361008974	0.341502484	1.057119615	0.290457	0.585838897	protein_coding	Eml5	98.59450849	105.8372062	82.12631212	76.99314183	37.1755873	41.37056193	31.57133393	28.9814459	NA
ENSMUSG00000066036	60.36941304	0.445017009	0.421195956	1.056555751	0.290714384	0.585838897	protein_coding	Ubr4	81.98911758	57.28802906	51.21856025	50.98194527	52.32636725	35.95719552	31.47796827	31.38577337	NA
ENSMUSG00000079505	475.3429603	-0.213954815	0.201367752	-1.062507842	0.2880052	0.585838897	antisense	Gm11131	422.3996311	458.3042325	572.234949	448.4330288	2918.111468	3113.793251	3806.866787	2988.326176	NA
ENSMUSG00000090862	118.7138362	0.361713769	0.341530055	1.059097916	0.289555189	0.585838897	protein_coding	Rps13	169.1674198	98.06933788	107.7355922	99.88299481	-673158.844	-383788.2123	-412833.5538	-383393.2349	NA
ENSMUSG00000097404	137.4387286	0.326568338	0.307192855	1.0630727	0.287748984	0.585838897	lincRNA	Gm10814	156.7133766	149.5314657	145.7079731	97.80209908	-613287.9854	-572991.7579	-559288.9087	-389178.6493	NA
ENSMUSG00000098716	51.29050381	0.498679484	0.472513421	1.055376338	0.29125324	0.585838897	miRNA	Gm28033	60.19454202	60.20097969	55.63395337	29.13254015	-235567.5705	-230684.9934	-213546.6742	-115925.5551	NA
ENSMUSG00000093656	55.18759928	0.459308974	0.43775937	1.049227054	0.29407363	0.588817131	antisense	Gm20628	52.9296835	74.76573284	44.15393125	48.90104954	-202822.0098	-286982.5462	-175699.3713	-191371.195	NA
ENSMUSG00000103380	97.92567703	0.363153731	0.345716198	1.050438866	0.293516384	0.588817131	antisense	Gm37756	116.2377363	103.8952391	70.64629	100.9234427	-445413.0411	-398793.9279	-281118.9942	-394957.5726	NA
ENSMUSG00000024782	85.36189065	0.375784774	0.359311615	1.045846442	0.295631935	0.590408495	protein_coding	Ak3	102.7458562	90.30146954	83.89246937	64.50776748	142.8889388	122.9664144	114.4331294	91.21972303	NA
ENSMUSG00000025359	680.3822386	0.222768539	0.213258982	1.044591585	0.29621177	0.590408495	protein_coding	Pmel	731.6750367	733.0925753	490.9917155	765.7696269	1385.534612	1439.149473	947.9355355	1447.63866	NA
ENSMUSG00000029165	117.5129998	0.316528644	0.30849655	1.026036253	0.304874496	0.596003182	protein_coding	Agbl5	125.5782687	134.9667125	97.13864875	112.3683692	159.4978844	168.5872254	118.8084822	137.6691316	NA
ENSMUSG00000032399	107.795417	-0.32614865	0.318034559	-1.025513236	0.305121083	0.596003182	protein_coding	Rpl4	90.29181303	100.9822885	119.2156144	120.6919521	256.8215659	282.478815	326.5361076	331.141405	NA
ENSMUSG00000038121	60.55328815	0.431544797	0.419584246	1.028505719	0.303712002	0.596003182	protein_coding	Fam210a	61.23237895	77.67868347	45.03700987	58.2650803	59.51780263	78.27364408	44.63143016	56.53755202	NA
ENSMUSG00000050908	137.7223064	0.311871295	0.302680486	1.030364722	0.302838827	0.596003182	protein_coding	Tvp23a	133.8809642	170.8931036	107.7355922	138.3795657	158.4799664	198.0785612	125.0861553	166.5597056	NA
ENSMUSG00000052155	51.29415581	0.511256474	0.493182821	1.036646964	0.299900417	0.596003182	protein_coding	Acvr2a	58.11886816	62.14294678	25.60928012	59.30552817	50.90673478	53.5312636	21.60082898	50.10779952	NA
ENSMUSG00000086600	45.28379602	0.519886283	0.502826591	1.033927586	0.301170018	0.596003182	processed_transcript	C030005K06Rik	55.00535737	51.4621278	24.7262015	49.9414974	-215260.0214	-197198.4621	-94909.633	-198729.5231	NA
ENSMUSG00000090207	81.89999346	0.386114419	0.375465824	1.028361026	0.303780035	0.596003182	antisense	4930524O07Rik	74.72425906	110.6921239	66.23089687	75.95269397	-297346.2378	-433186.695	-253791.1191	-291538.6057	NA
ENSMUSG00000090625	1979.880059	0.145076854	0.140365722	1.033563262	0.301340381	0.596003182	protein_coding	Gm20721	2094.354928	2064.311013	1870.360528	1890.493766	-8039021.18	-8214402.139	-7319538.794	-7244210.049	NA
ENSMUSG00000096935	51.66061969	-0.470686969	0.457144171	-1.029624786	0.303186176	0.596003182	antisense	1700113A16Rik	50.85400964	35.92639111	68.88013275	50.98194527	-202360.6341	-140595.6817	-263942.7639	-195690.297	NA
ENSMUSG00000097923	112.8465503	0.357663164	0.349350843	1.023793619	0.305932765	0.596263637	antisense	Gm26577	115.1998994	137.8796632	72.41244725	125.8941914	-458408.7833	-539583.4271	-277478.2903	-483235.2232	NA
ENSMUSG00000041406	53.6601217	0.439734099	0.432156906	1.017533431	0.308899737	0.600714312	protein_coding	BC055324	63.30805282	60.20097969	43.27085262	47.86060168	83.52730119	78.11431166	54.97685605	60.91155783	NA
ENSMUSG00000043795	59.10320738	-0.423479016	0.41760459	-1.014066957	0.310550804	0.602591957	protein_coding	Prr33	44.62698805	56.31704552	68.88013275	66.5886632	76.07063725	96.16044092	121.92661	115.9210691	NA
ENSMUSG00000108563	64.92510743	0.402714085	0.397923587	1.01203874	0.311519531	0.603140237	antisense	RP23-32A8.5	79.91344372	67.96884804	55.63395337	56.18418458	-306741.6407	-270464.7929	-217719.9925	-215292.9789	NA
ENSMUSG00000031958	76.94100295	0.377584571	0.374060912	1.009420014	0.312773244	0.603191481	protein_coding	Ldhd	77.83776986	96.1273708	72.41244725	61.38642389	134.4153499	166.2810092	129.854425	108.2613455	NA
ENSMUSG00000050088	81.95276688	0.395674484	0.392656075	1.007687158	0.313604672	0.603191481	protein_coding	1600012H06Rik	97.55667155	88.35950245	50.33548162	91.55941191	154.7854995	137.8745532	76.90639974	140.1291063	NA
ENSMUSG00000102912	140.0568273	-0.322246586	0.319710205	-1.007933376	0.313486447	0.603191481	TEC	Gm20731	116.2377363	133.0247454	193.3942189	117.5706085	-445413.0411	-510605.3095	-769563.2465	-460105.2134	NA
ENSMUSG00000097971	250.7117629	-0.251623999	0.250708277	-1.003652538	0.315546121	0.605600526	lincRNA	Gm26917	240.7781681	217.5003137	318.7913836	225.7771862	-922641.2993	-834858.3163	-1268549.461	-883564.8789	NA
ENSMUSG00000002028	45.44730271	-0.483542388	0.486679446	-0.99355416	0.320439971	0.607210151	protein_coding	Kmt2a	47.74049885	28.15852276	53.86779612	52.02239313	11.10394531	6.560505954	13.01081839	12.35729151	NA
ENSMUSG00000021666	173.9680288	0.27499428	0.275597737	0.997810371	0.31837132	0.607210151	protein_coding	Gfm2	180.5836261	200.0226099	134.227951	181.0379281	235.8490029	261.6808069	182.0470651	241.4725951	NA
ENSMUSG00000022680	51.01662702	0.448008886	0.45099893	0.993370176	0.32052959	0.607210151	protein_coding	Pdxdc1	66.42156361	51.4621278	47.68624575	38.49657092	88.9936146	69.06763669	66.34801436	52.67619561	NA
ENSMUSG00000046027	1409.185075	-0.149048747	0.149510547	-0.996911254	0.318807588	0.607210151	protein_coding	Stard5	1387.587977	1285.582211	1510.064449	1453.505664	2665.801989	2418.380377	2845.491837	2839.399686	NA
ENSMUSG00000068039	50.28954654	0.458909529	0.460655692	0.996209397	0.319148415	0.607210151	protein_coding	Tcp1	62.27021589	54.37507843	51.21856025	33.2943316	128.2293242	116.0793103	107.5325257	68.44475565	NA
ENSMUSG00000086360	46.72454074	0.462423479	0.464587369	0.995342341	0.319569791	0.607210151	antisense	Gm16214	55.00535737	53.40409489	44.15393125	34.33477946	-210775.8141	-204987.533	-175699.3713	-134367.0092	NA
ENSMUSG00000026103	120.2205625	0.296555069	0.302475315	0.980427342	0.326875219	0.617463333	protein_coding	Gls	135.956638	129.1408113	108.6186709	107.1661298	145.2752311	135.7101175	111.7662286	110.4589129	NA
ENSMUSG00000106086	442.7222555	0.220188632	0.224803429	0.979471859	0.327346887	0.617463333	antisense	Gm43352	543.8265521	409.7550553	469.7978285	347.5095861	-2087436.62	-1630516.323	-1838524.381	-1331626.944	NA
ENSMUSG00000019822	172.7640967	-0.254841138	0.261279102	-0.975359818	0.329381808	0.617519601	protein_coding	Smpd2	157.7512136	157.299334	184.5634326	191.4424067	388.4473679	380.9288941	437.6431015	454.7258871	NA
ENSMUSG00000086718	52.27043477	-0.428120937	0.438009487	-0.977423891	0.32835934	0.617519601	antisense	Gm16069	42.55131419	46.60721008	62.69858237	57.22463244	-163052.9882	-178898.2106	-249493.1073	-223945.0154	NA
ENSMUSG00000087327	132.8322661	0.290638262	0.298043706	0.97515316	0.329484292	0.617519601	antisense	Gm15884	155.6755397	136.9086796	131.5787151	107.1661298	-597548.6506	-544793.3686	-514925.0616	-410651.4227	NA
ENSMUSG00000104443	139.3822397	0.278962373	0.286975042	0.972078862	0.331011317	0.619061591	TEC	4932442E05Rik	161.9025613	143.7055644	121.8648502	130.0559828	-633595.5346	-550667.4037	-467768.9055	-517524.7996	NA
ENSMUSG00000076490	63.89007073	0.392913456	0.40564999	0.968602158	0.332743726	0.619664693	TR_C_gene	Trbc1	80.95128065	64.08491387	51.21856025	59.30552817	603.3500939	495.164392	389.2051029	441.2693203	NA
ENSMUSG00000097560	79.40965351	0.354993004	0.366184813	0.969436722	0.332327338	0.619664693	lincRNA	Gm26904	86.14046531	92.24343662	76.82784037	62.42687175	-330082.8786	-354069.3752	-305716.9061	-244303.6532	NA
ENSMUSG00000074219	87.34789286	0.344649258	0.357718373	0.96346535	0.335314045	0.62255331	protein_coding	Gm10644	98.59450849	97.09835434	89.19094112	64.50776748	1480.497515	1433.918223	1289.705813	934.3703052	NA
ENSMUSG00000099597	151.1943509	0.265094488	0.275373172	0.962673616	0.335711341	0.62255331	lincRNA	Gm28933	166.053909	164.0962188	140.4095014	134.2177743	-636304.3444	-629870.7833	-558724.0009	-525252.8543	NA
ENSMUSG00000105447	48.42451284	-0.464710322	0.484156593	-0.95983475	0.33713839	0.623883463	antisense	Gm43653	45.66482498	35.92639111	71.52936862	40.57746664	-175280.9375	-142959.962	-279925.7046	-155489.3736	NA
ENSMUSG00000109198	52.82606911	0.422530405	0.442218455	0.955478906	0.339335568	0.626630177	TEC	RP24-510K1.8	52.9296835	67.96884804	41.50469537	48.90104954	-207137.0017	-260450.799	-159312.5982	-194589.3247	NA
ENSMUSG00000064337	130.557862	-0.314776795	0.331263674	-0.950230342	0.341995224	0.630217615	Mt_rRNA	mt-Rnr1	147.3728443	85.44655182	133.3448724	156.0671794	603.2786578	342.4935791	535.3913099	649.6127192	NA
ENSMUSG00000064345	65.63505339	-0.38482774	0.405638189	-0.948697017	0.342774732	0.630332613	protein_coding	mt-Nd2	63.30805282	50.49114426	64.46473962	84.27627687	233.4851119	186.5316601	246.8922831	317.4301557	NA
ENSMUSG00000038213	58.70723836	0.402766189	0.426223044	0.944965775	0.344676349	0.632506286	protein_coding	Tapbpl	73.68642213	60.20097969	58.28318925	42.65836237	136.7696783	115.838748	110.2938158	79.04409462	NA
ENSMUSG00000096990	51.79591454	0.41823919	0.443328204	0.943407583	0.345472466	0.632646453	lincRNA	Gm26790	59.15670509	59.22999615	38.8554595	49.9414974	-231506.0607	-226964.2677	-149143.709	-198729.5231	NA
ENSMUSG00000027763	52.40128325	-0.420347307	0.448530916	-0.937164622	0.348673885	0.634689927	protein_coding	Mbnl1	48.77833578	40.78130882	50.33548162	69.71000679	33.4940806	29.03021033	35.23877551	47.7858265	NA
ENSMUSG00000036371	53.38540349	-0.42177989	0.450134864	-0.937007824	0.348754533	0.634689927	protein_coding	Serbp1	42.55131419	48.54917717	48.56932437	73.87179824	115.9694084	132.5407559	137.4603901	205.6135535	NA
ENSMUSG00000097779	45.63294456	-0.442378704	0.470787769	-0.939656324	0.347393875	0.634689927	lincRNA	4833407H14Rik	39.43780339	37.86835819	45.9200885	59.30552817	-151122.2818	-145354.7961	-182727.3462	-232088.4705	NA
ENSMUSG00000022160	48.89837241	-0.425274326	0.459146299	-0.926228365	0.354327315	0.641410374	protein_coding	Mettl3	43.58915112	39.81032528	47.68624575	64.50776748	96.24309444	88.04891285	109.3375517	145.4607365	NA
ENSMUSG00000026740	123.7008295	0.282980989	0.305716003	0.925633549	0.354636452	0.641410374	protein_coding	Dnajc1	127.6539426	143.7055644	100.6709632	122.7728478	199.7463854	220.1788899	154.5053145	195.3392286	NA
ENSMUSG00000053263	87.91786118	0.32137258	0.346531643	0.927397502	0.353720187	0.641410374	processed_transcript	Gm12592	93.40532383	101.9532721	80.36015487	75.95269397	121.0829478	132.3883071	108.1775561	100.5534883	NA
ENSMUSG00000008668	58.6835759	0.415377983	0.450855054	0.921311582	0.356887776	0.644156786	protein_coding	Rps18	81.98911758	52.43311134	61.81550375	38.49657092	574.3606399	367.9350767	449.6876049	275.4184999	NA
ENSMUSG00000022223	93.28843125	-0.31453856	0.348658508	-0.902139349	0.366982849	0.644950918	protein_coding	Sdr39u1	94.44316076	71.85278221	94.48941287	112.3683692	339.7034882	253.0640642	333.3551317	410.9755762	NA
ENSMUSG00000025026	50.50234393	-0.41698397	0.459646896	-0.90718326	0.364309894	0.644950918	protein_coding	Add3	44.62698805	41.75229237	45.9200885	69.71000679	42.56017734	39.88625694	45.4771892	67.89590493	NA
ENSMUSG00000027636	59.59863719	0.375053066	0.413251384	0.907566388	0.36410736	0.644950918	protein_coding	Sla2	68.49723747	66.02688095	47.68624575	56.18418458	123.3308715	116.4064171	84.21440373	102.862072	NA
ENSMUSG00000030788	50.19259575	0.406196225	0.445485772	0.911805158	0.361871295	0.644950918	protein_coding	Rnf141	57.08103123	57.28802906	40.62161675	45.77970595	88.8909833	87.35488115	62.04654536	72.49054097	NA
ENSMUSG00000038861	69.44211224	0.346002956	0.383274501	0.902754958	0.366655961	0.644950918	protein_coding	Pi4kb	76.79993293	78.64966702	60.93242512	61.38642389	87.41586257	88.04077416	66.78713662	67.39905386	NA
ENSMUSG00000038876	53.45894891	-0.393646097	0.436909771	-0.900978011	0.367600011	0.644950918	protein_coding	Rnf146	46.70266191	45.63622654	53.86779612	67.62911107	166.2936876	168.4580608	195.5549598	240.3979184	NA
ENSMUSG00000040596	47.27533307	0.431345044	0.471598929	0.914643815	0.360378649	0.644950918	protein_coding	Pogk	55.00535737	53.40409489	31.7908305	48.90104954	65.74306603	66.17096422	38.73935054	58.34800865	NA
ENSMUSG00000064351	335.5495126	-0.194642228	0.213655701	-0.911008822	0.362290725	0.644950918	protein_coding	mt-Co1	341.4483504	284.4981782	347.9329782	368.3185434	878.8532435	720.1589935	862.3863816	914.4647825	NA
ENSMUSG00000086618	47.20843651	0.463566641	0.514072776	0.901752948	0.367188119	0.644950918	antisense	Gm13256	68.49723747	40.78130882	26.49235875	53.06284099	-268059.6492	-156270.4794	-101688.8925	-211150.1182	NA
ENSMUSG00000090307	47.47040156	0.428264866	0.470433586	0.910362012	0.362631625	0.644950918	antisense	1700071M16Rik	45.66482498	63.11393032	35.323145	45.77970595	-181711.5898	-246992.4138	-135355.2635	-175721.8993	NA
ENSMUSG00000097221	83.02364218	0.330347274	0.361430232	0.914000118	0.360716784	0.644950918	protein_coding	1810049J17Rik	100.6701823	84.47556828	80.36015487	66.5886632	-386414.7941	-336149.0998	-314484.4336	-255162.0491	NA
ENSMUSG00000097816	76.54728932	0.336642664	0.369405845	0.91130844	0.362132881	0.644950918	antisense	Gm26811	89.2539761	81.56261765	63.581661	71.79090252	-355163.5618	-319190.1963	-243639.4744	-275563.8876	NA
ENSMUSG00000108219	55.18463219	0.400560419	0.442816099	0.904575105	0.365690529	0.644950918	TEC	Gm44101	62.27021589	63.11393032	37.08930225	58.2650803	-243690.5902	-241847.1705	-142364.4495	-231851.1102	NA
ENSMUSG00000108524	67.62264883	0.381833077	0.420017863	0.909087709	0.36330383	0.644950918	antisense	RP23-136A14.3	89.2539761	64.08491387	72.41244725	44.73925809	-355163.5618	-250792.2971	-277478.2903	-171728.2198	NA
ENSMUSG00000024661	66.71227581	-0.357916482	0.401545975	-0.891346208	0.372743466	0.649645193	protein_coding	Fth1	49.81617271	66.9978645	68.88013275	81.15493328	228.1137229	301.716855	303.731604	358.4660568	NA
ENSMUSG00000052403	251.3670535	-0.218559845	0.244515206	-0.893849708	0.371402309	0.649645193	antisense	Fcnaos	207.5673863	257.310639	300.2467325	240.3434563	606.8785979	739.8744098	845.3488171	677.8398027	NA
ENSMUSG00000062646	86.59482068	0.30897508	0.347530151	0.889059779	0.373970953	0.649645193	protein_coding	Ganc	96.51883462	95.15638725	77.710919	76.99314183	78.2678025	75.55555712	61.80841649	63.48418595	NA
ENSMUSG00000064215	46.47958929	0.421351856	0.473841094	0.889226074	0.373881592	0.649645193	protein_coding	Ifi27	51.89184657	54.37507843	31.7908305	47.86060168	232.6902845	252.7708345	145.3404489	214.2496761	NA
ENSMUSG00000078350	45.91722282	0.417817385	0.468326989	0.892148851	0.372313154	0.649645193	protein_coding	Smim1	46.70266191	58.2590126	37.08930225	41.6179145	582.5749174	714.7115905	445.5267295	500.7748628	NA
ENSMUSG00000006638	90.80181993	-0.302897383	0.343225751	-0.882501917	0.377505443	0.650641735	processed_transcript	Abhd1	84.06479145	78.64966702	106.8525136	93.64030763	243.1502563	222.7485453	303.1376199	275.4012237	NA
ENSMUSG00000027679	65.14297839	-0.377994252	0.427265139	-0.88468311	0.376327568	0.650641735	protein_coding	Dnajc19	51.89184657	61.17196324	53.86779612	93.64030763	363.5395122	421.4659283	363.4098185	632.8013341	NA
ENSMUSG00000063334	89.84467747	0.321752284	0.363613249	0.884875027	0.376224038	0.650641735	protein_coding	Krr1	80.95128065	118.4599923	71.52936862	88.43806832	120.8690451	173.1890635	104.7539144	134.2681663	NA
ENSMUSG00000084769	47.77441587	-0.417335686	0.472662672	-0.882946148	0.377265368	0.650641735	antisense	Gm12061	35.28645567	46.60721008	64.46473962	44.73925809	-138091.3345	-178594.8336	-247442.9717	-178028.5311	NA
ENSMUSG00000103041	66.4757579	0.343722697	0.392959097	0.874703498	0.381735256	0.656644404	antisense	Gm37305	78.87560679	69.91081513	60.93242512	56.18418458	-313865.4733	-273591.5969	-233487.8296	-215658.6946	NA
ENSMUSG00000027715	62.68253923	-0.416267602	0.477236067	-0.872246738	0.383073787	0.657659881	protein_coding	Ccna2	49.81617271	57.28802906	40.62161675	103.0043384	69.21367053	79.73013678	58.60892735	146.1570079	NA
ENSMUSG00000028979	79.19198436	0.342944675	0.39443858	0.86945013	0.384600974	0.658994651	protein_coding	Masp2	64.34588975	112.634091	67.99705412	71.79090252	129.1434121	234.3523136	139.138412	143.8413512	NA
ENSMUSG00000013483	104.4291378	0.285961407	0.329687731	0.867370485	0.385739048	0.659020082	protein_coding	Card14	114.1620625	115.5470417	106.8525136	81.15493328	106.5803963	108.0566404	103.5917843	77.37720772	NA
ENSMUSG00000032185	47.5295881	-0.402296437	0.464179028	-0.866683785	0.386115292	0.659020082	protein_coding	Carm1	35.28645567	46.60721008	58.28318925	49.9414974	44.34532256	57.3522266	71.84186368	63.81808704	NA
ENSMUSG00000043154	51.28604257	-0.37876344	0.441928407	-0.857069684	0.391406374	0.664181859	protein_coding	Ppp2r3a	43.58915112	45.63622654	61.81550375	54.10328885	47.64115528	49.96325288	70.15947515	60.39071099	NA
ENSMUSG00000055188	78.03876876	0.316191135	0.368516604	0.858010553	0.390886636	0.664181859	antisense	Rbm3os	94.44316076	78.64966702	66.23089687	72.83135038	432.5928974	373.4682616	309.2965003	333.0351923	NA
ENSMUSG00000097620	90.67053262	-0.295975638	0.344336225	-0.85955417	0.390034848	0.664181859	antisense	4921514A10Rik	87.17830224	75.73671639	105.0863564	94.68075549	-346903.9441	-296390.8966	-402681.909	-363424.8373	NA
ENSMUSG00000024925	75.44514492	-0.332504392	0.389486627	-0.853699122	0.393271721	0.666061354	protein_coding	Rnaseh2c	51.89184657	81.56261765	83.00939075	85.31672473	331.4453338	512.3438143	510.5696137	525.6528435	NA
ENSMUSG00000107577	72.44111685	0.329389476	0.38732744	0.85041606	0.39509381	0.667860499	TEC	Gm44103	74.72425906	86.41753536	54.75087475	73.87179824	-286823.3523	-343876.6653	-214264.1196	-283070.3982	NA
ENSMUSG00000097412	608.555221	0.427127884	0.503075105	0.849034031	0.395862356	0.667875261	lincRNA	1810014B01Rik	579.1130077	816.59716	361.1791576	677.3315585	-2219111.401	-3134445.732	-1437220.858	-2650694.637	NA
ENSMUSG00000029771	64.48513067	0.348489549	0.413744848	0.842281303	0.399630514	0.668800939	protein_coding	Irf5	68.49723747	75.73671639	45.03700987	68.66955893	129.2401065	140.5362241	81.8292845	124.9800138	NA
ENSMUSG00000043909	115.539401	0.282733811	0.334524172	0.845182005	0.398009228	0.668800939	protein_coding	Trp53bp1	103.7836931	149.5314657	89.19094112	119.6515042	67.42214205	95.1181537	56.83144169	79.037652	NA
ENSMUSG00000051786	64.58787339	0.342015061	0.405474253	0.843493906	0.398952272	0.668800939	protein_coding	Tubgcp6	68.49723747	75.73671639	48.56932437	65.54821534	71.3527185	77.58923995	48.72080821	65.86434828	NA
ENSMUSG00000086196	49.38321083	0.385949093	0.456796605	0.844903595	0.398164667	0.668800939	antisense	Gm13571	63.30805282	48.54917717	38.8554595	46.82015382	-242591.0313	-186352.3028	-154615.4468	-183227.7399	NA
ENSMUSG00000090215	53.16164152	0.378558101	0.450001892	0.841236687	0.400215351	0.668800939	protein_coding	Trim34b	71.61074827	48.54917717	41.50469537	50.98194527	-284956.8112	-189994.1645	-159042.4347	-195690.297	NA
ENSMUSG00000074398	1054.669343	-0.169949928	0.203286089	-0.836013563	0.403147273	0.672422112	antisense	Gm15441	1062.745018	923.4053498	1350.227218	882.2997875	3813.277071	3258.511279	4665.423759	3053.778397	NA
ENSMUSG00000013736	52.55953709	0.368399178	0.44328221	0.831071425	0.405933281	0.675786656	protein_coding	Trnt1	58.11886816	60.20097969	38.8554595	53.06284099	137.4521439	147.5998342	93.689715	125.2817362	NA
ENSMUSG00000092371	196.9410092	-0.225873708	0.272936428	-0.827568931	0.407914669	0.677801502	antisense	Gm20511	186.8106477	176.7190049	252.5604867	171.6738973	-731071.7707	-677172.0775	-969434.1085	-683132.7355	NA
ENSMUSG00000026018	97.68702928	0.272866166	0.331822003	0.822326922	0.410890859	0.680331424	protein_coding	Ica1l	110.0107147	103.8952391	93.60633425	83.23582901	115.4052236	112.9884545	100.1154761	87.16932532	NA
ENSMUSG00000062604	65.85858318	0.32883841	0.399968322	0.822161136	0.410985195	0.680331424	protein_coding	Srpk2	73.68642213	72.82376576	50.33548162	66.5886632	43.84431788	44.92074201	30.53553792	39.55387522	NA
ENSMUSG00000029475	64.18491486	0.333723359	0.407808433	0.81833364	0.413166703	0.680894433	protein_coding	Kdm2b	80.95128065	62.14294678	51.21856025	62.42687175	64.58001022	48.75551935	39.34746033	48.03944904	NA
ENSMUSG00000057132	238.4530379	0.218418001	0.267625343	0.816133473	0.414423801	0.680894433	protein_coding	Rpgrip1	221.0592664	291.295063	179.2649609	262.1928614	206.0747011	265.8927371	163.910157	248.5302516	NA
ENSMUSG00000073437	102.4513752	0.278505982	0.340933743	0.81689181	0.413990259	0.680894433	processed_transcript	D330041H03Rik	92.3674869	132.0537619	86.54170525	98.84254694	185.3111474	265.3812898	180.2988313	202.5204804	NA
ENSMUSG00000097057	516.6507006	-0.159732484	0.195143376	-0.818539102	0.413049424	0.680894433	lincRNA	Gm17638	510.6157703	466.0721008	604.0257795	485.8891518	-1956635.859	-1788982.106	-2403567.4	-1901496.767	NA
ENSMUSG00000037443	63.78459617	-0.365495978	0.450417152	-0.811461056	0.417100948	0.684014428	protein_coding	Cep85	38.39996646	72.82376576	56.517032	87.39762046	39.11360437	74.30315102	59.78075367	90.91576672	NA
ENSMUSG00000030319	269.5393818	0.207463388	0.258265758	0.803294208	0.421804705	0.689498692	protein_coding	Cand2	345.5996982	232.0650669	221.6527349	278.8400272	278.3962234	193.7972883	182.0407339	224.2373726	NA
ENSMUSG00000101695	88.65385654	0.335229879	0.417507139	0.802932087	0.422013989	0.689498692	antisense	1700094J05Rik	94.44316076	102.9242556	45.9200885	111.3279213	-375812.6061	-402787.6287	-175961.8426	-427323.7098	NA
ENSMUSG00000028483	516.3463677	-0.180226537	0.229299484	-0.785987539	0.431874788	0.692910096	protein_coding	Snapc3	474.2914777	493.2596401	419.4623469	678.3720064	1612.606425	1642.162168	1398.848072	2345.273115	NA
ENSMUSG00000038593	421.911237	0.16271994	0.205627785	0.791332455	0.428750014	0.692910096	protein_coding	Tctn1	475.3293146	416.5519401	438.8900766	356.8736169	967.2474852	833.6230792	860.0302478	700.5022137	NA
ENSMUSG00000050555	107.732297	0.263371662	0.33573841	0.784454961	0.4327732	0.692910096	protein_coding	Hyls1	117.2755733	117.4890088	78.59399762	117.5706085	309.1778075	310.2666479	215.1667568	316.5498544	NA
ENSMUSG00000054006	172.204763	-0.209734334	0.263953803	-0.794587281	0.426853619	0.692910096	antisense	D630008O14Rik	149.4485181	169.9221201	186.3295899	183.1188238	567.4546523	634.5224959	681.2967702	670.6942723	NA
ENSMUSG00000060126	263.940951	0.206179721	0.260970304	0.790050509	0.429498271	0.692910096	protein_coding	Tpt1	344.5618612	221.3842479	264.0405089	225.7771862	1547.86813	996.2092621	1231.749403	1035.832214	NA
ENSMUSG00000090761	56.53616715	-0.33506569	0.426744958	-0.785166136	0.432356167	0.692910096	antisense	Gm17201	45.66482498	54.37507843	68.88013275	57.22463244	-174983.6947	-208714.5791	-274091.0193	-223945.0154	NA
ENSMUSG00000097605	104.2560297	-0.258764053	0.326122393	-0.793456869	0.427511689	0.692910096	lincRNA	9430098F02Rik	96.51883462	93.21442017	102.4371205	124.8537435	-384072.2239	-364788.7958	-392530.2643	-479241.5437	NA
ENSMUSG00000098843	79.42119421	0.297845366	0.379217	0.785421977	0.432206199	0.692910096	antisense	Gm27240	93.40532383	81.56261765	57.40011062	85.31672473	-371682.7973	-319190.1963	-219952.3033	-327481.7215	NA
ENSMUSG00000101555	50.51376222	-0.41078565	0.521371513	-0.787894314	0.430758527	0.692910096	antisense	Gm28731	38.39996646	48.54917717	83.89246937	31.21343588	-150275.864	-186036.285	-322014.8262	-124205.9519	NA
ENSMUSG00000102725	65.51249989	0.315820539	0.396527755	0.796465154	0.425761721	0.692910096	TEC	Gm37939	71.61074827	73.7947493	63.581661	53.06284099	-284956.8112	-288791.13	-243639.4744	-203677.6561	NA
ENSMUSG00000109130	46.83861025	0.362758575	0.459065537	0.790210864	0.429404632	0.692910096	antisense	RP23-16L19.4	53.96752043	51.4621278	42.387774	39.53701878	-214750.0607	-201393.8144	-162426.3163	-151759.8222	NA
ENSMUSG00000097233	121.981242	-0.238308624	0.304441959	-0.782771944	0.433761046	0.693229017	lincRNA	Gm17552	116.2377363	107.7791733	142.1756586	121.7323999	-462538.5922	-421787.0452	-544804.9358	-467260.5051	NA
ENSMUSG00000041642	59.50910472	-0.333641469	0.427452716	-0.780534213	0.435076498	0.694069404	protein_coding	Kif21b	55.00535737	50.49114426	79.47707625	53.06284099	23.91084439	21.58552885	33.26953714	22.25012629	NA
ENSMUSG00000096976	211.6485468	0.211579526	0.271553197	0.779145774	0.435893849	0.694113574	lincRNA	Gm26882	231.4376357	222.3552314	154.5387594	238.2625605	-905716.6937	-852046.1854	-593185.2062	-948105.4329	NA
ENSMUSG00000042508	62.17659883	0.312259703	0.404670481	0.771639437	0.44032801	0.699906547	protein_coding	Dmtf1	73.68642213	64.08491387	54.75087475	56.18418458	80.7666055	70.36185344	62.31899899	62.89281689	NA
ENSMUSG00000097231	85.01297367	0.270649811	0.351684311	0.769581704	0.441548061	0.700578964	antisense	Gm26852	97.55667155	88.35950245	75.06168312	79.07403756	-373828.8023	-339161.191	-298688.9313	-309451.294	NA
ENSMUSG00000087660	90.94327775	0.262438157	0.342611082	0.765994362	0.443679657	0.702692646	antisense	B230398E01Rik	96.51883462	101.9532721	88.3078625	76.99314183	-377720.4148	-390676.1986	-338962.975	-306374.6814	NA
ENSMUSG00000097128	93.97831027	0.272925701	0.357675875	0.763053143	0.445431703	0.702848225	lincRNA	Gm26884	107.9350409	98.06933788	103.3201991	66.5886632	-429500.1213	-383788.2123	-395914.1459	-255595.4899	NA
ENSMUSG00000097149	45.64944338	0.374194238	0.49119457	0.761804509	0.446176689	0.702848225	antisense	G630030J09Rik	50.85400964	52.43311134	51.21856025	28.09209229	-195199.2259	-208644.2688	-200440.628	-107646.4894	NA
ENSMUSG00000108298	68.84427729	-0.295749241	0.387512271	-0.76319968	0.44534432	0.702848225	lincRNA	Gm44226	64.34588975	59.22999615	70.64629	81.15493328	-246986.7756	-235690.7481	-276469.8317	-310978.7473	NA
ENSMUSG00000024621	61.15071681	0.310234556	0.408402988	0.759628516	0.447476669	0.703635048	protein_coding	Csf1r	68.49723747	66.9978645	59.16626787	49.9414974	87.97571378	86.19613803	78.91307444	65.50793448	NA
ENSMUSG00000005893	71.25184118	0.288517375	0.382457736	0.754377145	0.450622791	0.707316845	protein_coding	Nr2c2	83.02695451	73.7947493	68.88013275	59.30552817	133.7358849	123.2259712	113.1171154	95.36454047	NA
ENSMUSG00000005150	61.64134778	0.305331427	0.406594875	0.750947554	0.45268422	0.707702274	protein_coding	Wdr83	64.34588975	71.85278221	52.10163887	58.2650803	294.0583583	328.922371	247.2573145	271.9341001	NA
ENSMUSG00000031207	139.9722571	-0.224902106	0.300423953	-0.748615758	0.454088831	0.707702274	protein_coding	Msn	151.524192	106.8081898	152.7726021	148.7840443	157.6865939	108.8365449	155.9382919	157.4387371	NA
ENSMUSG00000038298	46.66474158	0.364397503	0.484917262	0.751463253	0.452373908	0.707702274	protein_coding	Pdzk1	61.23237895	43.69425945	31.7908305	49.9414974	100.893881	70.80527869	50.44295536	79.37748135	NA
ENSMUSG00000097507	147.195885	-0.2086696	0.278564617	-0.749088673	0.453803761	0.707702274	lincRNA	Gm26538	140.1079857	133.0247454	155.421838	160.2289708	-537793.7856	-529338.2376	-608233.6298	-613983.6806	NA
ENSMUSG00000057342	73.3742854	-0.283178129	0.379266818	-0.746646201	0.455277152	0.708298437	protein_coding	Sphk2	67.45940054	65.05589741	89.19094112	71.79090252	99.43432746	93.89401956	128.9463671	107.5983764	NA
ENSMUSG00000020272	46.38153028	-0.35703508	0.483858411	-0.737891648	0.460580295	0.708987773	protein_coding	Stk10	44.62698805	36.89737465	64.46473962	39.53701878	33.65368956	28.84552942	49.5635995	29.76472822	NA
ENSMUSG00000027985	64.94613344	-0.293897255	0.399196015	-0.736222917	0.461595047	0.708987773	protein_coding	Lef1	64.34588975	52.43311134	73.29552587	69.71000679	73.93824696	59.25316132	81.10371697	77.26726207	NA
ENSMUSG00000040462	104.3172073	-0.264048279	0.355045661	-0.743702311	0.457056591	0.708987773	protein_coding	Os9	99.63234542	90.30146954	143.0587372	84.27627687	154.8304196	145.47846	226.6604896	130.744724	NA
ENSMUSG00000078552	61.5765331	0.304073298	0.413301302	0.73571822	0.461902199	0.708987773	protein_coding	Dcdc2b	77.83776986	58.2590126	52.9847175	57.22463244	291.775132	213.8348104	194.8063075	218.1139002	NA
ENSMUSG00000087177	95.40906585	0.250067769	0.340101681	0.735273545	0.462172917	0.708987773	processed_transcript	E130307A14Rik	115.1998994	92.24343662	90.95709837	83.23582901	-442186.0015	-367059.3618	-355954.9083	-318952.5613	NA
ENSMUSG00000097658	87.23086597	0.270828764	0.365888629	0.740194535	0.459181963	0.708987773	lincRNA	Gm16755	93.40532383	97.09835434	62.69858237	95.72120336	-371682.7973	-379988.329	-240255.5928	-367418.5168	NA
ENSMUSG00000097864	45.14580911	0.34749239	0.472595614	0.735284839	0.462166039	0.708987773	lincRNA	Gm26856	48.77833578	52.43311134	45.03700987	34.33477946	-186914.4012	-201260.487	-179213.3588	-134367.0092	NA
ENSMUSG00000098573	136.6863918	0.216801855	0.294510697	0.736142551	0.46164395	0.708987773	antisense	Gm27232	149.4485181	144.676548	141.29258	111.3279213	-584857.4165	-554388.1294	-542340.76	-443001.2285	NA
ENSMUSG00000002326	46.68638022	0.337777082	0.460875116	0.732903707	0.463617162	0.70996426	protein_coding	Gmpr2	49.81617271	54.37507843	38.8554595	43.69881023	128.2871662	140.2651741	103.9082304	114.9277938	NA
ENSMUSG00000089647	435.4296151	0.159298581	0.219719841	0.725007721	0.468447294	0.715835548	antisense	Gm2245	495.0482163	423.3488249	342.6345065	480.6869125	-1900204.709	-1684609.282	-1340878.684	-1841951.042	NA
ENSMUSG00000091908	64.82570192	-0.310711562	0.429173341	-0.723976847	0.469079949	0.715835548	antisense	Gm17231	67.45940054	48.54917717	89.19094112	54.10328885	-268437.5758	-189994.1645	-341772.0405	-207671.3356	NA
ENSMUSG00000018707	47.41977196	0.333834743	0.462881789	0.721209498	0.470780629	0.717185741	protein_coding	Dync1h1	60.19454202	45.63622654	43.27085262	40.57746664	16.63626294	12.40411964	11.51619654	10.81771786	NA
ENSMUSG00000085687	55.16785322	0.308009519	0.429190476	0.717652269	0.47297172	0.719277063	processed_transcript	Gm16153	55.00535737	66.9978645	47.68624575	50.98194527	-215260.0214	-256730.0733	-183040.0065	-202869.7215	NA
ENSMUSG00000007880	48.3644171	-0.338880639	0.474824639	-0.713696407	0.475414929	0.721743908	protein_coding	Arid1a	47.74049885	37.86835819	66.23089687	41.6179145	28.24853597	23.22915485	39.95536723	24.58398037	NA
ENSMUSG00000097211	74.74185754	0.282756526	0.397872379	0.710671413	0.477287878	0.723338009	antisense	BC065403	70.57291134	93.21442017	52.9847175	82.19538114	-276182.6689	-357189.6672	-203377.785	-327075.6734	NA
ENSMUSG00000025794	78.91308835	0.277805221	0.3918088	0.709032622	0.478304233	0.723630673	protein_coding	Rpl14	108.9728778	64.08491387	69.76321137	72.83135038	580.950077	354.180086	379.1860539	387.61596	NA
ENSMUSG00000079659	84.71827783	0.251553308	0.356463729	0.705691175	0.48038021	0.724310357	protein_coding	Tmem243	99.63234542	84.47556828	71.52936862	83.23582901	385.1270256	338.5187309	281.8989976	321.2009681	NA
ENSMUSG00000086835	65.68378224	0.280433631	0.397407899	0.705656912	0.480401522	0.724310357	antisense	Gm11775	67.45940054	76.70769993	64.46473962	54.10328885	-268437.5758	-300190.7799	-247023.356	-207671.3356	NA
ENSMUSG00000087691	55.06330058	0.300007677	0.436940421	0.686610032	0.492328505	0.741021842	antisense	Gm15674	60.19454202	61.17196324	40.62161675	58.2650803	-239528.9138	-239392.6473	-155658.5531	-223646.0537	NA
ENSMUSG00000097893	98.12870993	-0.239882673	0.352145408	-0.681203466	0.495742755	0.744885268	antisense	1700034P13Rik	84.06479145	96.1273708	128.0464006	84.27627687	-322129.0743	-368977.5595	-509528.1769	-329809.9318	NA
ENSMUSG00000024667	57.10560642	-0.286840868	0.426087055	-0.673197799	0.500821461	0.745287426	protein_coding	Tmem216	44.62698805	58.2590126	66.23089687	59.30552817	168.5636269	216.4148053	240.9028184	216.079481	NA
ENSMUSG00000086586	78.83372917	-0.249579965	0.370977205	-0.672763614	0.501097689	0.745287426	antisense	Gm11192	67.45940054	76.70769993	96.25557012	74.91224611	-258937.7486	-305238.8377	-376690.1457	-287057.3052	NA
ENSMUSG00000087442	148.9948421	-0.231674685	0.341754225	-0.677898524	0.497836036	0.745287426	antisense	Gm14453	131.8052903	142.7345809	216.3542631	105.0852341	-515811.7493	-546946.678	-830459.2887	-418160.0381	NA
ENSMUSG00000097641	51.9610248	-0.29445385	0.437361213	-0.673250945	0.500787655	0.745287426	lincRNA	Gm26865	47.74049885	45.63622654	58.28318925	56.18418458	-186829.4525	-174874.1079	-223715.5635	-223570.7134	NA
ENSMUSG00000102425	45.97706147	0.326223854	0.484804109	0.672898286	0.501012002	0.745287426	TEC	Gm26616	53.96752043	48.54917717	51.21856025	30.17298801	-214750.0607	-189994.1645	-196265.1321	-115816.7064	NA
ENSMUSG00000106082	134.6081973	0.195537556	0.290226526	0.673741159	0.50047589	0.745287426	antisense	4930404A12Rik	150.4863551	136.9086796	120.9817716	130.0559828	-576650.8121	-525513.4938	-481416.2775	-508965.9441	NA
ENSMUSG00000093511	45.94733572	-0.335951285	0.501777244	-0.66952276	0.503162067	0.747093677	antisense	Gm20680	43.58915112	37.86835819	67.99705412	34.33477946	-167029.8904	-145354.7961	-270577.0319	-134367.0092	NA
ENSMUSG00000105255	57.71426432	-0.292618888	0.438379579	-0.667501183	0.504452054	0.747745962	antisense	Gm42413	40.47564033	63.11393032	56.517032	70.75045465	-155362.6492	-251145.8791	-221175.8654	-271109.6771	NA
ENSMUSG00000085788	119.3611053	0.203578971	0.307844264	0.661305065	0.508416694	0.752353996	processed_transcript	4930470G03Rik	120.389084	134.9667125	102.4371205	119.6515042	-462104.2898	-537065.8031	-400881.256	-458494.3069	NA
ENSMUSG00000005103	64.38337069	0.260836237	0.396869818	0.657233746	0.51103063	0.753598181	protein_coding	Wdr1	69.53507441	70.88179867	60.93242512	56.18418458	97.25736152	97.501399	82.06953589	75.80270462	NA
ENSMUSG00000085425	78.79980498	0.254820989	0.38845156	0.655991674	0.511829481	0.753598181	antisense	Gm15648	96.51883462	74.76573284	56.517032	87.39762046	-369851.9002	-286982.5462	-224895.1953	-342025.1144	NA
ENSMUSG00000086268	46.02640111	-0.31951494	0.485873381	-0.657609477	0.510789103	0.753598181	antisense	Gm11670	37.36212953	44.665243	63.581661	38.49657092	-143168.4775	-171444.1185	-253007.0947	-150653.9194	NA
ENSMUSG00000097133	45.5806473	-0.343251087	0.525875706	-0.652722846	0.513934971	0.755432843	antisense	Gm26628	45.66482498	34.95540756	71.52936862	30.17298801	-175280.9375	-139096.1792	-279925.7046	-115620.3035	NA
ENSMUSG00000107724	70.90782489	0.261396652	0.402524122	0.649393759	0.516083897	0.757325117	processed_pseudogene	Gm16042	66.42156361	88.35950245	76.82784037	52.02239313	-259936.6296	-338586.0387	-294897.7882	-207009.9199	NA
ENSMUSG00000104358	49.66582807	0.306739817	0.475922918	0.644515751	0.519241047	0.760688134	TEC	Gm37127	59.15670509	50.49114426	31.7908305	57.22463244	-227068.4872	-200916.7033	-124411.4243	-219279.8859	NA
ENSMUSG00000086898	121.5266064	0.209531855	0.326498391	0.641754631	0.521032512	0.762042558	antisense	Itpr3os	148.4106812	112.634091	132.4617937	92.59985977	-569663.0469	-448198.7997	-518380.9345	-354834.7245	NA
ENSMUSG00000027901	60.94024044	0.262352597	0.412324853	0.636276457	0.524596247	0.764709952	protein_coding	Dennd2d	74.72425906	58.2590126	55.63395337	55.14373672	75.20137527	57.66135493	53.91617099	53.53187029	NA
ENSMUSG00000047767	51.76999577	0.298765178	0.469263585	0.636668148	0.524341025	0.764709952	protein_coding	Atg16l2	72.6485852	41.75229237	52.10163887	40.57746664	130.2152869	77.58237614	95.21200135	72.60769257	NA
ENSMUSG00000031988	59.33137192	0.274808208	0.433810314	0.633475506	0.526423171	0.76483631	protein_coding	Vps26b	53.96752043	75.73671639	44.15393125	63.46731962	58.04152393	84.44243625	48.41514285	68.14270889	NA
ENSMUSG00000097614	305.2383501	0.135811505	0.214157763	0.634165688	0.525972698	0.76483631	lincRNA	Gm26508	323.8051226	315.5696516	303.779047	277.7995793	-1240793.472	-1211289.968	-1208811.675	-1087151.257	NA
ENSMUSG00000040840	132.7904633	0.183972527	0.294606649	0.624468346	0.532320053	0.768899696	antisense	4930579G18Rik	136.9944749	145.6475315	135.1110296	113.408817	492.4433327	514.8893347	467.6909513	393.2349312	NA
ENSMUSG00000056666	54.80977184	0.275804441	0.440591564	0.625986659	0.531323692	0.768899696	protein_coding	Retsat	71.61074827	48.54917717	51.21856025	47.86060168	90.65287364	61.56336398	67.33111026	61.87626938	NA
ENSMUSG00000066406	80.85490993	-0.23042813	0.367629841	-0.626793869	0.530794363	0.768899696	protein_coding	Akap13	63.30805282	85.44655182	88.3078625	86.35717259	98.76503889	130.5257571	135.1257624	136.9888248	NA
ENSMUSG00000101014	51.1742026	0.293264667	0.470080173	0.623860958	0.532718902	0.768899696	antisense	Gm28289	65.38372668	47.57819363	57.40011062	34.33477946	-260177.9581	-186194.2812	-219952.3033	-131791.4245	NA
ENSMUSG00000028329	55.08188189	0.277877638	0.448959498	0.618936985	0.535957873	0.770130115	protein_coding	Xpa	52.9296835	67.96884804	60.93242512	38.49657092	224.7814854	283.8760195	249.1865844	157.7013262	NA
ENSMUSG00000034994	226.9353184	0.154811072	0.250227716	0.618680754	0.536126691	0.770130115	protein_coding	Eef2	268.7997652	209.7324454	230.4835211	198.7255418	333.8793055	260.9536298	297.2935878	252.0907496	NA
ENSMUSG00000070327	80.62922924	0.242018692	0.391255272	0.618569793	0.536199807	0.770130115	protein_coding	Rnf213	108.9728778	66.02688095	83.00939075	64.50776748	52.18798052	31.09785338	38.28196767	29.79999168	NA
ENSMUSG00000097799	697.3423041	0.109376606	0.17778992	0.615201389	0.538421731	0.771221285	lincRNA	Gm26899	760.7344707	686.4853652	619.0381161	723.1112645	-3027149.893	-2686517.486	-2372100.994	-2775607.274	NA
ENSMUSG00000102234	113.0890054	0.197517887	0.321293525	0.61475838	0.538714299	0.771221285	antisense	Gm37885	122.4647579	119.4309758	120.9817716	89.47851618	-470071.6052	-475245.279	-473454.5868	-342874.0034	NA
ENSMUSG00000032058	91.38633644	0.210548886	0.345511746	0.609382714	0.542270793	0.771288069	protein_coding	Ppp2r1b	102.7458562	93.21442017	75.94476175	93.64030763	110.2974829	97.98098128	79.96383445	102.2130999	NA
ENSMUSG00000037531	97.12582971	0.214300009	0.351195841	0.610200874	0.541728751	0.771288069	protein_coding	Mrpl47	85.10262838	123.31491	81.2432335	98.84254694	382.8089731	543.1404183	358.4436057	452.0906296	NA
ENSMUSG00000048316	81.23422027	0.233202932	0.381334206	0.611544753	0.540839	0.771288069	pseudogene	Gm9823	92.3674869	83.50458473	91.840177	57.22463244	1107.087315	984.3071172	1060.0111	661.6035367	NA
ENSMUSG00000100826	125.4416478	0.196237604	0.320384226	0.612507071	0.540202321	0.771288069	processed_transcript	Snhg14	128.6917795	138.8506467	92.72325562	141.5009093	-493135.8669	-532967.5859	-368968.6798	-553754.9471	NA
ENSMUSG00000085166	53.12977738	0.282733633	0.468328741	0.603707627	0.546038042	0.774864004	antisense	Gm15522	58.11886816	58.2590126	32.67390912	63.46731962	-222706.5205	-223622.7633	-130017.5348	-248375.3807	NA
ENSMUSG00000097367	113.2372199	0.188312106	0.312322648	0.602940925	0.546547989	0.774864004	lincRNA	Gm26718	128.6917795	112.634091	108.6186709	103.0043384	-493135.8669	-432337.3424	-432220.4535	-403101.0277	NA
ENSMUSG00000079179	147.1663832	0.17537631	0.292535244	0.599504893	0.548836248	0.776855172	antisense	Rab10os	153.5998659	158.2703176	116.5663785	160.2289708	591.1138405	599.0144838	431.9848837	594.8033343	NA
ENSMUSG00000002103	125.7847169	0.19035814	0.319323929	0.596128641	0.551089292	0.778790173	protein_coding	Acp2	117.2755733	150.5024492	98.02172737	137.3391179	181.9168789	242.0231672	155.0219808	212.6780061	NA
ENSMUSG00000031390	235.314135	0.142237627	0.240804708	0.590676272	0.554737349	0.781432901	protein_coding	Avpr2	238.7024942	255.3686719	246.3789364	200.8064375	523.6251585	550.9202344	520.4536732	424.9063668	NA
ENSMUSG00000090327	49.36297888	0.273333329	0.462290083	0.591259339	0.554346669	0.781432901	antisense	Gm17111	51.89184657	56.31704552	53.86779612	35.37522733	-203075.4919	-215802.0906	-206767.4147	-140766.7455	NA
ENSMUSG00000042594	47.33475209	-0.269755922	0.465890952	-0.579010861	0.562581844	0.785381804	protein_coding	Sh2b3	36.3242926	49.52016071	55.63395337	47.86060168	52.86370369	74.71200779	82.54786444	69.53468162	NA
ENSMUSG00000056880	67.62174935	-0.226554715	0.3899235	-0.581023496	0.561224618	0.785381804	protein_coding	Gadl1	65.38372668	59.22999615	68.88013275	76.99314183	143.7022286	130.3985141	157.2073526	172.8178026	NA
ENSMUSG00000090458	125.2397314	0.173806684	0.298361096	0.582538027	0.560204335	0.785381804	antisense	Gm17122	126.6161056	138.8506467	114.8002212	120.6919521	-495504.2001	-532063.7752	-440651.8675	-480263.0141	NA
ENSMUSG00000099137	87.30318859	0.202656169	0.348949102	0.580761401	0.561401273	0.785381804	antisense	Gm10603	95.48099769	91.27245308	75.06168312	87.39762046	-365874.998	-350342.3292	-298688.9313	-342025.1144	NA
ENSMUSG00000102055	60.98899451	0.23863422	0.410426157	0.581430339	0.560950455	0.785381804	antisense	Gm28913	59.15670509	72.82376576	54.75087475	57.22463244	-226683.4227	-279528.4541	-217867.2205	-223945.0154	NA
ENSMUSG00000106696	45.58311904	0.274371389	0.474250387	0.578536985	0.562901635	0.785381804	TEC	Gm42729	42.55131419	57.28802906	45.03700987	37.45612305	-166521.9033	-219522.8163	-172871.1172	-149047.1423	NA
ENSMUSG00000089968	54.35709721	0.250680658	0.435249394	0.575947172	0.56465089	0.786573902	antisense	Nckap5los	57.08103123	61.17196324	56.517032	42.65836237	-219101.1719	-243418.3136	-221175.8654	-163463.1877	NA
ENSMUSG00000022217	146.0025218	0.169874034	0.296091736	0.573720956	0.566156645	0.787423562	protein_coding	Emc9	151.524192	157.299334	113.9171426	161.2694187	720.3728714	735.4612819	521.5301373	739.5702834	NA
ENSMUSG00000017837	65.70407285	-0.226049448	0.395473705	-0.5715916	0.567598687	0.788182063	protein_coding	Nkiras2	57.08103123	64.08491387	75.06168312	66.5886632	126.5749116	147.3192732	169.6991312	147.4073074	NA
ENSMUSG00000022283	69.53102452	0.218221981	0.383774887	0.568619752	0.569614217	0.789733276	protein_coding	Pabpc1	76.79993293	72.82376576	67.1139755	61.38642389	103.9529351	98.73841545	94.33523294	84.85762119	NA
ENSMUSG00000092517	60.89809789	0.231908747	0.4104805	0.564968975	0.572094867	0.791923446	polymorphic_pseudogene	Art2a-ps	69.53507441	62.14294678	60.93242512	50.98194527	-266452.4442	-238530.9475	-242465.1325	-199514.6501	NA
ENSMUSG00000024018	142.0125342	0.162198226	0.288907818	0.561418611	0.5745122	0.792335338	protein_coding	Ccdc167	133.8809642	166.0381859	135.9941082	132.1368785	614.5862393	746.3273839	612.3202129	616.7802891	NA
ENSMUSG00000051212	65.7226201	0.220442638	0.392494203	0.561645589	0.574357513	0.792335338	protein_coding	Gpr183	70.57291134	70.88179867	60.0493465	61.38642389	106.0644955	110.4370169	92.01227758	92.1016108	NA
ENSMUSG00000078719	101.3823722	-0.186592366	0.332867014	-0.560561301	0.575096639	0.792335338	protein_coding	Msmp	98.59450849	91.27245308	120.9817716	94.68075549	581.3325326	557.9041153	727.2727908	557.309583	NA
ENSMUSG00000027961	55.4467686	-0.274084061	0.49113407	-0.558063628	0.576800936	0.793439785	protein_coding	Lrrc39	46.70266191	53.40409489	35.323145	86.35717259	59.88464701	67.05108569	44.42502949	112.593862	NA
ENSMUSG00000025353	147.243316	0.154453922	0.281863194	0.54797478	0.58370922	0.794527226	protein_coding	Ormdl2	155.6755397	154.3863834	128.0464006	150.8649401	757.0245214	752.0308664	646.6093616	749.239207	NA
ENSMUSG00000030589	57.08024285	-0.231586415	0.42294655	-0.547554803	0.583997631	0.794527226	protein_coding	Rasgrp4	46.70266191	58.2590126	60.93242512	62.42687175	52.93909092	66.15079524	71.72463614	72.26849672	NA
ENSMUSG00000039219	46.43557121	0.253361137	0.463730767	0.546353952	0.584822657	0.794527226	protein_coding	Arid4b	45.66482498	55.34606197	44.15393125	40.57746664	31.21924058	37.21215489	29.06865036	26.75947113	NA
ENSMUSG00000040441	76.89129866	-0.207912611	0.375381785	-0.553869737	0.579667998	0.794527226	protein_coding	Slc26a10	77.83776986	65.05589741	91.840177	72.83135038	82.55401645	69.11488671	101.1499287	78.88760827	NA
ENSMUSG00000042298	62.50798503	0.21947307	0.401578189	0.546526371	0.584704166	0.794527226	protein_coding	Ttc19	68.49723747	66.02688095	58.28318925	57.22463244	121.5138936	114.691454	101.4123135	103.2234414	NA
ENSMUSG00000085667	385.3123383	-0.108726105	0.198406787	-0.547995899	0.583694719	0.794527226	processed_transcript	Gm12992	357.0159044	384.5094832	399.1515385	400.5724271	-1370378.239	-1530057.971	-1562054.549	-1534959.201	NA
ENSMUSG00000087440	46.76434648	0.257559768	0.468619099	0.549614322	0.582583934	0.794527226	TEC	4930577N17Rik	44.62698805	57.28802906	47.68624575	37.45612305	-171297.2799	-227963.1826	-186617.1364	-143528.6526	NA
ENSMUSG00000097815	54.89014269	0.23493871	0.429472057	0.547040735	0.584350747	0.794527226	lincRNA	Gm26809	63.30805282	55.34606197	46.80316712	54.10328885	-243003.1179	-220235.6171	-183161.2635	-207319.1649	NA
ENSMUSG00000063406	92.22552885	-0.194111818	0.357249047	-0.543351535	0.586887788	0.796102416	protein_coding	Tmed5	90.29181303	81.56261765	79.47707625	117.5706085	406.384538	359.4490613	350.8529931	538.0591361	NA
ENSMUSG00000006728	55.36416002	-0.23208897	0.434069238	-0.534681911	0.592869832	0.801742434	protein_coding	Cdk4	43.58915112	58.2590126	64.46473962	55.14373672	163.995965	219.5608869	251.8616418	211.8817479	NA
ENSMUSG00000097380	52.00876936	0.236938106	0.442749965	0.535151043	0.592545416	0.801742434	lincRNA	Gm26816	57.08103123	55.34606197	41.50469537	54.10328885	-218729.6184	-212441.6251	-165157.4091	-211729.8327	NA
ENSMUSG00000092267	7581.416528	0.06918696	0.130005892	0.532183261	0.594599075	0.802845756	processed_transcript	Gm20417	7656.123043	7869.821619	7144.106076	7655.615373	-29387442.64	-31315959.24	-27958011.73	-29335661.83	NA
ENSMUSG00000085872	394.5335941	0.77399886	1.459622103	0.530273458	0.595922346	0.803398378	antisense	Gm11505	157.7512136	837.958798	83.00939075	499.414974	-627730.9465	-3279299.279	-318084.8693	-1916966.175	NA
ENSMUSG00000030447	50.1606228	0.23776828	0.457135947	0.520125974	0.602975776	0.809165763	protein_coding	Cyfip1	55.00535737	53.40409489	37.08930225	55.14373672	48.34757421	48.66225134	33.23715632	48.38700982	NA
ENSMUSG00000066306	84.21842656	0.188318887	0.362971626	0.518825368	0.603882526	0.809165763	protein_coding	Numa1	103.7836931	75.73671639	80.36015487	76.99314183	55.50588924	41.99178695	43.8183689	41.10786112	NA
ENSMUSG00000069633	117.6334131	-0.16502021	0.316109682	-0.522034657	0.601646201	0.809165763	protein_coding	Pex11g	116.2377363	105.8372062	141.29258	107.1661298	455.8007032	406.371845	543.4276152	427.2950249	NA
ENSMUSG00000097272	118.6731502	-0.159532241	0.306467521	-0.520551872	0.602678984	0.809165763	lincRNA	Gm26649	120.389084	103.8952391	124.5140861	125.8941914	-471135.1411	-398117.65	-477937.7947	-500964.006	NA
ENSMUSG00000009687	62.56725576	-0.221190224	0.441481551	-0.501018046	0.616358422	0.812262449	protein_coding	Fxyd5	47.74049885	67.96884804	85.65862662	48.90104954	233.6669219	327.173223	403.7349497	230.8769224	NA
ENSMUSG00000012819	46.98818834	0.232074982	0.46213509	0.502179962	0.615540937	0.812262449	protein_coding	Cdh23	55.00535737	46.60721008	46.80316712	39.53701878	20.22550234	16.78049738	16.8796746	14.78225492	NA
ENSMUSG00000021772	95.05368994	-0.177733726	0.345893285	-0.51383977	0.60736402	0.812262449	protein_coding	Nkiras1	83.02695451	95.15638725	86.54170525	115.4897127	339.0346954	402.8199044	360.2931317	470.7943392	NA
ENSMUSG00000041720	59.97098477	-0.206430078	0.410277336	-0.503147652	0.614860466	0.812262449	protein_coding	Pi4ka	55.00535737	56.31704552	60.93242512	67.62911107	33.19352681	33.27711498	36.06545146	41.497748	NA
ENSMUSG00000075297	62.09738578	-0.204882034	0.405336207	-0.505461961	0.613234409	0.812262449	protein_coding	H60b	59.15670509	56.31704552	71.52936862	61.38642389	235.3041319	232.2273574	290.0784504	243.7590818	NA
ENSMUSG00000090330	116.8194681	0.157864195	0.308879827	0.511086129	0.609290748	0.812262449	antisense	9130221H12Rik	132.8431272	113.6050746	109.5017495	111.3279213	-509908.1819	-452062.5825	-428528.2391	-426599.0508	NA
ENSMUSG00000091514	74.88800572	-0.209070535	0.414808237	-0.504017318	0.614249207	0.812262449	protein_coding	Gm17484	72.6485852	66.02688095	54.75087475	106.125682	-278856.037	-262737.2274	-214264.1196	-406664.5157	NA
ENSMUSG00000097197	112.8669406	-0.164452353	0.326462586	-0.503740275	0.614443903	0.812262449	lincRNA	9530027J09Rik	90.29181303	122.3439265	107.7355922	131.0964307	-359293.3707	-478785.2945	-412833.5538	-503203.6208	NA
ENSMUSG00000097206	125.6012627	-0.157472043	0.312117706	-0.504527747	0.613890569	0.812262449	lincRNA	Gm26699	126.6161056	110.6921239	112.1509854	152.9458358	-485182.0626	-424883.2503	-446276.4032	-598543.9502	NA
ENSMUSG00000097275	423.7234146	0.09957704	0.196330919	0.507189802	0.61202165	0.812262449	antisense	Gm26648	446.2698805	430.1457097	381.489966	436.9881023	-1712972.799	-1711655.761	-1492937.091	-1674500.947	NA
ENSMUSG00000104548	54.42031589	0.230116403	0.449125124	0.51236591	0.608394945	0.812262449	TEC	Gm43857	57.08103123	60.20097969	37.97238087	62.42687175	-227139.4872	-235592.764	-145506.9083	-239620.7718	NA
ENSMUSG00000087067	49.1066335	-0.228141182	0.458251128	-0.497851871	0.618588452	0.813980913	processed_transcript	Gm11532	49.81617271	40.78130882	60.0493465	45.77970595	-198230.8252	-159595.0982	-230103.948	-175721.8993	NA
ENSMUSG00000014503	48.39056619	0.221863509	0.45294931	0.489819731	0.624261467	0.819027474	protein_coding	Pkd2l2	50.85400964	53.40409489	47.68624575	41.6179145	117.448391	127.8628469	112.2846789	95.95444083	NA
ENSMUSG00000086216	74.24326855	0.19308603	0.394227358	0.489783436	0.624287153	0.819027474	antisense	Gm13610	90.29181303	67.96884804	56.517032	82.19538114	-346578.2174	-270464.7929	-221175.8654	-314965.6543	NA
ENSMUSG00000001855	83.53134112	0.173734581	0.360130117	0.482421693	0.629506414	0.819502088	protein_coding	Nup214	98.59450849	78.64966702	83.00939075	73.87179824	46.87685998	36.61508708	38.71038713	35.71304655	NA
ENSMUSG00000023944	115.8082182	-0.147310416	0.307689797	-0.478762759	0.632107413	0.819502088	protein_coding	Hsp90ab1	110.0107147	109.7211404	116.5663785	126.9346392	173.2329794	169.9195931	176.7599405	192.8092215	NA
ENSMUSG00000025736	151.051002	0.132231242	0.275114041	0.48064156	0.630771272	0.819502088	protein_coding	Jmjd8	156.7133766	159.2413011	145.7079731	142.5413572	296.6957633	301.9938503	286.4663663	275.6060646	NA
ENSMUSG00000064367	1891.963647	-0.080580209	0.166174294	-0.484913802	0.627737492	0.819502088	protein_coding	mt-Nd5	2050.765776	1627.368419	1795.298845	2094.421547	4397.558048	3416.951383	3775.954675	4566.695547	NA
ENSMUSG00000075010	47.57706069	0.229453814	0.4775705	0.480460611	0.630899905	0.819502088	lincRNA	AW112010	39.43780339	63.11393032	38.8554595	48.90104954	247.9190152	390.1933868	235.214518	296.5291279	NA
ENSMUSG00000085884	57.8947238	-0.206199884	0.429842783	-0.479710006	0.631433612	0.819502088	processed_transcript	Gm15342	53.96752043	53.40409489	50.33548162	73.87179824	-207150.1989	-212508.0516	-196984.7551	-283070.3982	NA
ENSMUSG00000096926	49.88487263	-0.230359549	0.478834885	-0.481083472	0.630457174	0.819502088	lincRNA	Gm26823	35.28645567	56.31704552	42.387774	65.54821534	-135444.3608	-224099.3999	-165881.899	-251175.142	NA
ENSMUSG00000097026	63.13440466	0.194941909	0.402281847	0.484590369	0.627966947	0.819502088	lincRNA	Gm26786	72.6485852	62.14294678	57.40011062	60.34597603	-284305.6886	-238126.4448	-220325.9337	-240131.507	NA
ENSMUSG00000014313	53.80008384	0.210844959	0.442648231	0.476326221	0.633841988	0.820540659	protein_coding	Cox6c	56.0431943	59.22999615	40.62161675	59.30552817	517.1094092	566.5642984	382.1397914	546.2829326	NA
ENSMUSG00000107191	269.6092176	0.1091115	0.23055505	0.473255735	0.636030738	0.822163263	antisense	Gm43579	264.6484175	295.1789972	283.4682386	235.1412169	-1053101.259	-1155164.52	-1086225.99	-902571.5739	NA
ENSMUSG00000024163	160.7305975	0.135361931	0.287363612	0.47104757	0.637606765	0.822990229	protein_coding	Mapk8ip3	165.0160721	171.8640872	180.1480395	125.8941914	118.3506028	120.6943002	126.7267422	91.81050234	NA
ENSMUSG00000001525	88.17975692	0.16651093	0.356395613	0.467208135	0.640350974	0.82532039	protein_coding	Tubb5	95.48099769	91.27245308	96.25557012	69.71000679	220.8385963	206.7069834	218.362673	163.9440264	NA
ENSMUSG00000038900	181.4875705	-0.122974412	0.264361185	-0.465175746	0.641805606	0.825984081	protein_coding	Rpl12	183.6971369	164.0962188	207.5234769	170.6334495	687.574264	636.7423557	791.9357685	637.5941011	NA
ENSMUSG00000054434	45.9574242	0.219775626	0.474472176	0.463200241	0.643220844	0.826595207	protein_coding	Tmem120b	44.62698805	54.37507843	49.452403	35.37522733	106.9769765	128.1888339	114.1550415	81.79825544	NA
ENSMUSG00000006333	63.07350853	-0.182293744	0.402288013	-0.45314237	0.650446227	0.832412365	protein_coding	Rps9	55.00535737	63.11393032	64.46473962	69.71000679	264.2848636	296.9271584	303.797387	340.5688061	NA
ENSMUSG00000021340	87.95429507	-0.157117921	0.346880961	-0.452944781	0.650588504	0.832412365	protein_coding	Gpld1	80.95128065	85.44655182	98.02172737	87.39762046	100.1165784	103.9284319	116.7399709	104.2638945	NA
ENSMUSG00000028530	47.53301647	-0.21746482	0.478392745	-0.454573824	0.64941587	0.832412365	protein_coding	Jak1	40.47564033	47.57819363	63.581661	38.49657092	29.13207813	34.30226459	47.52199375	28.29712987	NA
ENSMUSG00000002803	46.68018353	-0.224787594	0.498178298	-0.451219161	0.651831601	0.832790665	protein_coding	Btbd6	43.58915112	42.72327591	67.1139755	33.2943316	84.15913249	81.12317552	124.7816597	62.00763948	NA
ENSMUSG00000027950	240.0237016	-0.103788743	0.232335322	-0.446719606	0.655077524	0.835722995	protein_coding	Chrnb2	237.6646573	225.2681821	257.8589585	239.3030084	170.7388371	167.7704659	188.8667201	171.6242961	NA
ENSMUSG00000009551	58.87656313	-0.184940789	0.415613926	-0.444982176	0.656332635	0.835801693	protein_coding	6330409D20Rik	53.96752043	56.31704552	67.99705412	57.22463244	188.7386162	192.8526279	233.2453	203.4950061	NA
ENSMUSG00000046110	282.6219783	0.098421321	0.221668494	0.4440023	0.657040921	0.835801693	protein_coding	Serinc4	282.2916453	301.975882	256.9758799	289.2445058	422.7109752	452.9547961	399.5976324	442.3369518	NA
ENSMUSG00000049728	55.09650426	-0.213751219	0.494353382	-0.43238547	0.665461277	0.845289686	protein_coding	Zfp668	50.85400964	51.4621278	84.775548	33.2943316	71.72967454	71.07531524	117.2839993	47.75143222	NA
ENSMUSG00000048603	295.4646718	0.097516623	0.227856857	0.427973176	0.66867065	0.848140695	antisense	Gm9828	296.8213624	313.6276845	249.9112509	321.4983895	1314.017888	1359.495929	1085.141651	1447.196046	NA
ENSMUSG00000048154	69.13368565	-0.168160675	0.39462406	-0.426128794	0.670014	0.848620037	protein_coding	Kmt2d	64.34588975	66.02688095	84.775548	61.38642389	15.65907654	15.73343372	20.23533711	15.1900818	NA
ENSMUSG00000029655	47.6205087	0.205376167	0.483469265	0.424796739	0.670984855	0.848626889	protein_coding	N4bp2l2	42.55131419	59.22999615	33.55698775	55.14373672	25.42736659	35.4541613	20.8236292	33.65326476	NA
ENSMUSG00000085111	47.27349918	-0.192354537	0.458428087	-0.419595881	0.674780698	0.85145024	protein_coding	Ascl4	42.55131419	45.63622654	46.80316712	54.10328885	-163052.9882	-175171.1646	-186241.3336	-211729.8327	NA
ENSMUSG00000106702	58.30401001	0.180123637	0.429802859	0.419084315	0.675154513	0.85145024	antisense	Gm42846	56.0431943	67.96884804	64.46473962	44.73925809	-215117.5142	-270464.7929	-252278.7214	-171437.0017	NA
ENSMUSG00000045231	79.66586243	0.177315691	0.425434237	0.416787545	0.676833813	0.85234516	protein_coding	BC106179	113.1242255	56.31704552	90.95709837	58.2650803	108.7459033	53.00960222	85.7607134	56.95188166	NA
ENSMUSG00000105552	73.03117677	-0.156243873	0.3775651	-0.41381969	0.679006163	0.853857535	lincRNA	Gm19710	65.38372668	72.82376576	82.12631212	71.79090252	-250544.8356	-279528.4541	-326800.8307	-280949.2011	NA
ENSMUSG00000096351	109.1686893	-0.136738241	0.333646446	-0.409829755	0.681930837	0.856310294	protein_coding	Samd11	89.2539761	118.4599923	98.904806	130.0559828	-355163.5618	-463585.7613	-378994.7379	-499209.9413	NA
ENSMUSG00000022488	50.60413735	-0.179424893	0.448407126	-0.400138362	0.68905461	0.85790227	protein_coding	Nckap1l	41.51347726	53.40409489	56.517032	50.98194527	34.82866421	44.06358443	45.6606413	41.25875964	NA
ENSMUSG00000022961	137.7449494	-0.11810714	0.291132894	-0.405681195	0.684976861	0.85790227	protein_coding	Son	134.9188011	129.1408113	129.8125579	157.1076272	66.49827189	62.32449851	62.75510998	78.73677052	NA
ENSMUSG00000039521	123.4593912	0.132549367	0.328436319	0.40357707	0.68652375	0.85790227	protein_coding	Foxp3	100.6701823	157.299334	106.8525136	129.015535	107.5991027	165.3454453	109.9784239	133.0153805	NA
ENSMUSG00000039834	90.79476508	0.150957339	0.377014177	0.400402286	0.68886024	0.85790227	protein_coding	Zfp335	92.3674869	99.04032143	110.3848281	61.38642389	77.78532969	86.46464263	94.77492585	51.60761606	NA
ENSMUSG00000079144	86.4060656	0.141503845	0.350840437	0.403328208	0.686706793	0.85790227	protein_coding	A130010J15Rik	87.17830224	94.18540371	88.3078625	75.95269397	206.6238002	231.4213815	213.391349	179.7123879	NA
ENSMUSG00000097224	166.5594971	-0.107859682	0.269236875	-0.400612591	0.688705374	0.85790227	antisense	Gm26716	151.524192	168.9511366	161.6033884	184.1592717	-602952.0934	-661179.6924	-619250.3307	-706881.2769	NA
ENSMUSG00000026341	99.74224845	0.131236929	0.331759402	0.395578628	0.692415906	0.860867866	protein_coding	Actr3	99.63234542	108.7501569	86.54170525	104.0447863	151.0391534	170.9098218	133.7581137	157.4607826	NA
ENSMUSG00000037742	71.86239166	0.148328509	0.379916732	0.390423733	0.696223241	0.864378855	protein_coding	Eef1a1	69.53507441	81.56261765	69.76321137	66.5886632	153.3937149	186.5274434	156.904574	146.6448558	NA
ENSMUSG00000055725	103.6063278	0.123564467	0.323249291	0.382257503	0.702270373	0.868207677	protein_coding	Paqr3	113.1242255	102.9242556	95.3724915	103.0043384	231.2133579	218.0835847	198.7402944	210.1724146	NA
ENSMUSG00000078653	162.0006063	0.104541459	0.27315777	0.382714571	0.701931409	0.868207677	protein_coding	Cntd1	158.7890505	176.7190049	143.9418159	168.5525537	282.7117474	309.431212	246.7886796	289.4747579	NA
ENSMUSG00000107406	109.9259343	0.129239078	0.336116959	0.384506271	0.700603249	0.868207677	antisense	Gm44195	94.44316076	134.9667125	92.72325562	117.5706085	-361898.0959	-518059.4017	-368968.6798	-460105.2134	NA
ENSMUSG00000002109	76.16591352	0.145189911	0.38378955	0.378306056	0.705203247	0.869388014	protein_coding	Ddb2	68.49723747	91.27245308	62.69858237	82.19538114	167.786475	231.777651	156.5839028	200.9991412	NA
ENSMUSG00000090019	125.4219507	-0.114868227	0.302668319	-0.379518501	0.704302868	0.869388014	protein_coding	Gimap1	124.5404318	116.5180252	143.0587372	117.5706085	-495577.063	-455985.9948	-548188.8174	-451285.7869	NA
ENSMUSG00000024524	70.18241207	0.144116345	0.383211955	0.376074762	0.706861316	0.87021162	protein_coding	Gnal	70.57291134	76.70769993	62.69858237	70.75045465	93.6844965	105.5641839	84.85802374	93.76091203	NA
ENSMUSG00000090266	192.9401766	0.104249627	0.278307564	0.374584239	0.707969696	0.870357151	protein_coding	Mettl23	170.2052568	229.1521162	158.0710739	214.3322597	-666087.6133	-878091.2653	-606743.7252	-852880.8698	NA
ENSMUSG00000097242	76.55810408	0.138734071	0.373791809	0.371153321	0.710523339	0.872276557	lincRNA	Gm16907	81.98911758	78.64966702	82.12631212	63.46731962	-314708.956	-312966.4032	-321396.1794	-243201.328	NA
ENSMUSG00000040774	58.32504297	0.156923415	0.429739072	0.365159758	0.714992156	0.876538501	protein_coding	Cept1	68.49723747	54.37507843	45.9200885	64.50776748	132.3751354	102.8941428	87.0423442	126.7616299	NA
ENSMUSG00000108591	76.3687373	0.142585398	0.396932704	0.359218066	0.719431962	0.880753057	TEC	RP23-60P18.13	80.95128065	79.62065056	91.840177	53.06284099	-322125.091	-311590.4298	-351923.6852	-203677.6561	NA
ENSMUSG00000030830	82.14599175	0.13021233	0.366992081	0.354809646	0.722732201	0.882335562	protein_coding	Itgal	91.32964997	80.5916341	90.07401975	66.5886632	76.82706006	70.28138697	77.25159663	55.91980036	NA
ENSMUSG00000101845	119.8486945	-0.107833817	0.303083171	-0.355789523	0.721998196	0.882335562	antisense	Gm28198	116.2377363	114.5760581	128.9294792	119.6515042	-446169.6591	-455926.3652	-504557.4429	-458494.3069	NA
ENSMUSG00000104559	60.53888763	0.144624472	0.410916855	0.35195556	0.724871591	0.883720012	antisense	Gm43118	58.11886816	68.93983158	54.75087475	60.34597603	-227444.5509	-264171.5247	-210157.0445	-240131.507	NA
ENSMUSG00000005763	162.7110545	-0.095397158	0.27549572	-0.346274554	0.72913639	0.88431672	protein_coding	Cd247	163.9782352	150.5024492	150.1233662	186.2401674	617.3790211	587.4314146	576.2612971	700.0062344	NA
ENSMUSG00000026715	55.59002723	0.150387162	0.43037121	0.349435925	0.726762067	0.88431672	protein_coding	Serpinc1	50.85400964	66.02688095	50.33548162	55.14373672	126.7847791	164.8920831	130.3170354	140.4043984	NA
ENSMUSG00000085731	130.8598139	-0.107858664	0.310875384	-0.346951447	0.728627795	0.88431672	antisense	Gm16229	132.8431272	119.4309758	159.8372311	111.3279213	-509043.4755	-458426.6648	-636031.7243	-435674.8481	NA
ENSMUSG00000106375	138.1203537	-0.103590948	0.299444769	-0.345943422	0.729385235	0.88431672	TEC	Gm43361	135.956638	130.1117948	120.9817716	165.4312101	-532057.7887	-498577.2439	-464379.2757	-658291.5451	NA
ENSMUSG00000097274	68.89115521	0.132308735	0.387172503	0.341730713	0.732553557	0.886934678	lincRNA	Gm26564	66.42156361	77.67868347	67.99705412	63.46731962	-254521.7377	-298163.6844	-270577.0319	-248375.3807	NA
ENSMUSG00000035877	308.1671408	0.072701374	0.217251911	0.334640895	0.737895992	0.892174109	protein_coding	Zhx3	293.7078516	337.9022731	287.8836317	313.1748066	173.1332356	195.8905836	163.4168429	178.0753335	NA
ENSMUSG00000049482	74.71050362	-0.125079338	0.382794607	-0.326753136	0.743854608	0.898143132	protein_coding	Ctu2	65.38372668	77.67868347	89.19094112	66.5886632	107.4202854	124.9614005	143.7248551	111.2395875	NA
ENSMUSG00000011658	70.21792065	0.122982863	0.381125833	0.322683095	0.746935256	0.898161546	protein_coding	Fuz	72.6485852	73.7947493	68.88013275	65.54821534	170.6532586	170.4788253	155.8103683	148.5252718	NA
ENSMUSG00000090117	71.46007097	0.125398499	0.387871717	0.323298899	0.746468888	0.898161546	antisense	Gm16541	66.42156361	82.53360119	60.93242512	75.95269397	-254954.0909	-328421.5343	-238455.2298	-291044.2122	NA
ENSMUSG00000092283	79.85607556	-0.11807586	0.363440435	-0.324883662	0.745269123	0.898161546	processed_transcript	Gm20412	72.6485852	80.5916341	89.19094112	76.99314183	-289086.6201	-315390.313	-341772.0405	-295532.2853	NA
ENSMUSG00000009281	50.15564892	-0.141064216	0.449530549	-0.313803403	0.75367036	0.900369105	protein_coding	Rarres2	50.85400964	44.665243	58.28318925	46.82015382	283.418255	244.810408	312.7957771	251.7024914	NA
ENSMUSG00000030707	69.21451777	-0.121766863	0.388513503	-0.313417326	0.753963623	0.900369105	protein_coding	Coro1a	70.57291134	62.14294678	78.59399762	65.54821534	166.6134692	144.2850967	178.6801907	149.2742868	NA
ENSMUSG00000030890	101.7113219	-0.101714385	0.326152859	-0.311861086	0.755146098	0.900369105	protein_coding	Ilk	92.3674869	103.8952391	108.6186709	101.9638905	209.6719115	230.9267111	241.8355332	235.3477047	NA
ENSMUSG00000037089	70.93735069	-0.133116772	0.419784282	-0.317107566	0.751161984	0.900369105	protein_coding	Slc35b2	70.57291134	65.05589741	97.13864875	50.98194527	136.2519334	122.9840266	183.9463604	100.0837304	NA
ENSMUSG00000040385	100.6455083	0.104714772	0.335658357	0.311968315	0.755064603	0.900369105	protein_coding	Ppp1ca	119.3512471	89.33048599	97.13864875	96.76165122	340.032526	254.9354922	287.3893063	281.5395259	NA
ENSMUSG00000069911	322.8513414	-0.068818433	0.221412871	-0.31081496	0.755941296	0.900369105	protein_coding	Fam196b	340.4105135	290.3240795	362.0622362	298.6085366	268.9788137	225.6086385	275.4947282	227.5984959	NA
ENSMUSG00000086150	200.8814202	0.087135185	0.279893005	0.311316051	0.755560366	0.900369105	antisense	Bach2os	207.5673863	206.8194947	239.3143074	149.8244922	-795380.4305	-793860.8097	-952290.5927	-586328.7676	NA
ENSMUSG00000028484	59.7054446	0.127739541	0.420654846	0.303668297	0.761380613	0.905620513	protein_coding	Psip1	64.34588975	60.20097969	47.68624575	66.5886632	188.724021	176.8670918	145.2394344	199.4569945	NA
ENSMUSG00000007892	75.84259622	-0.122034294	0.406989239	-0.299846488	0.764294253	0.906632454	protein_coding	Rplp1	89.2539761	56.31704552	95.3724915	62.42687175	686.7742673	434.0736369	762.0695625	490.5695846	NA
ENSMUSG00000029623	66.84860993	-0.11888992	0.395504155	-0.300603466	0.763716888	0.906632454	protein_coding	Pdap1	62.27021589	66.02688095	77.710919	61.38642389	190.910112	209.8540155	242.9048042	187.8814009	NA
ENSMUSG00000097423	57.75210971	-0.121936815	0.421362694	-0.289386832	0.772285371	0.914877144	lincRNA	Gm26522	58.11886816	52.43311134	53.86779612	66.5886632	-227444.5509	-200919.1878	-206767.4147	-264972.6974	NA
ENSMUSG00000045391	47.77306876	0.136529356	0.474119763	0.287963858	0.773374404	0.914934187	antisense	1700120B22Rik	48.77833578	51.4621278	56.517032	34.33477946	426.5956403	442.6237678	475.9745531	289.6514824	NA
ENSMUSG00000000915	113.4884416	0.09330077	0.332971075	0.280206833	0.779318825	0.915364887	protein_coding	Hip1r	130.7674534	103.8952391	129.8125579	89.47851618	114.1553028	94.02427903	115.5363465	77.97907742	NA
ENSMUSG00000006301	58.67162314	0.116960057	0.420325742	0.278260513	0.780812385	0.915364887	protein_coding	Tmbim1	58.11886816	64.08491387	63.581661	48.90104954	108.1708588	117.3022905	113.9567233	87.79370343	NA
ENSMUSG00000020888	142.9334081	-0.081681403	0.293332836	-0.278459799	0.780659421	0.915364887	protein_coding	Dvl2	141.1458227	136.9086796	167.7849387	125.8941914	134.2747499	130.4651176	165.7541239	122.3135635	NA
ENSMUSG00000024160	55.69684952	-0.12019264	0.432379439	-0.277979546	0.78102806	0.915364887	protein_coding	Spsb3	61.23237895	45.63622654	61.81550375	54.10328885	124.5698991	91.30598907	121.1000569	106.1714395	NA
ENSMUSG00000041671	66.88770641	0.118984837	0.421901186	0.282020626	0.777927695	0.915364887	protein_coding	Pyroxd1	49.81617271	89.33048599	61.81550375	66.5886632	68.66941605	120.5730061	83.57664054	93.33310934	NA
ENSMUSG00000051557	46.32015521	0.131438417	0.468381062	0.280622826	0.778999707	0.915364887	protein_coding	Pusl1	41.51347726	55.34606197	46.80316712	41.6179145	140.9491078	184.8066105	153.0253619	136.3030556	NA
ENSMUSG00000097554	147.2673166	-0.082758438	0.295854176	-0.279727126	0.779686865	0.915364887	lincRNA	Gm26825	140.1079857	145.6475315	125.3971647	177.9165845	-548303.828	-558108.8551	-481327.4245	-707973.9259	NA
ENSMUSG00000038274	59.8061635	0.112562981	0.411684023	0.273420814	0.784529755	0.917297502	protein_coding	Fau	61.23237895	63.11393032	61.81550375	53.06284099	459.1726555	474.0860931	481.3681407	406.3759397	NA
ENSMUSG00000084846	56.03606789	0.115905925	0.42438379	0.273115817	0.784764189	0.917297502	antisense	A730011C13Rik	62.27021589	54.37507843	56.517032	50.98194527	-243690.5902	-208360.6392	-216936.304	-202869.7215	NA
ENSMUSG00000086993	74.55552193	0.102453148	0.380852408	0.26901011	0.787921902	0.919765408	antisense	Rsf1os2	72.6485852	81.56261765	61.81550375	82.19538114	-289086.6201	-319190.1963	-236871.7112	-315500.6829	NA
ENSMUSG00000101013	142.7782617	-0.076218766	0.285069581	-0.267368991	0.789185072	0.920018141	antisense	A630072M18Rik	138.0323119	139.8216303	135.1110296	158.1480751	-529826.4702	-556384.7169	-528748.5531	-606009.8665	NA
ENSMUSG00000041920	47.05876882	-0.120974855	0.458008261	-0.264132474	0.791677842	0.92048257	protein_coding	Slc16a6	43.58915112	46.60721008	51.21856025	46.82015382	78.23724495	82.27081547	88.52734873	81.06250738	NA
ENSMUSG00000097439	113.411824	0.08480019	0.320749819	0.264381101	0.791486273	0.92048257	processed_transcript	Gm16754	116.2377363	117.4890088	126.2802434	93.64030763	-446169.6591	-467517.7135	-494189.8242	-358821.6315	NA
ENSMUSG00000024081	46.73517377	0.120041684	0.46284708	0.259354955	0.795361381	0.922037961	protein_coding	Cebpz	47.74049885	49.52016071	39.73853812	49.9414974	57.16858486	58.31900324	45.82445726	57.68781747	NA
ENSMUSG00000095913	48.1832052	0.117337402	0.452235436	0.259460875	0.795279665	0.922037961	antisense	Gm21844	49.81617271	50.49114426	47.68624575	44.73925809	-190891.3033	-193806.3949	-189755.3211	-175084.2848	NA
ENSMUSG00000097518	45.40322811	-0.121175957	0.46909836	-0.258316735	0.796162472	0.922037961	lincRNA	Gm26694	38.39996646	48.54917717	46.80316712	47.86060168	-147395.3338	-193189.1378	-183161.2635	-183397.7228	NA
ENSMUSG00000109536	345.3951549	0.055329121	0.219068965	0.252564852	0.800604493	0.925962302	TEC	RP24-439I22.3	355.9780675	347.6121085	294.0651821	383.9252613	-1393097.874	-1332019.801	-1128746.707	-1527733.208	NA
ENSMUSG00000092609	407.8199199	0.151360228	0.603119718	0.250962161	0.801843364	0.926176501	protein_coding	Gm20481	501.2752379	357.321944	533.3794895	239.3030084	-1920843.74	-1371552.948	-2122448.406	-936497.3371	NA
ENSMUSG00000089788	83.13934202	0.095681016	0.384401657	0.248908957	0.803431206	0.926792691	antisense	Gm16586	69.53507441	101.9532721	65.34781825	95.72120336	-266905.064	-405697.1894	-255734.5943	-366795.4455	NA
ENSMUSG00000035949	53.3330497	0.109785727	0.444049144	0.247237786	0.804724204	0.927067595	protein_coding	Fbxw2	45.66482498	65.05589741	54.75087475	47.86060168	95.76979251	133.5951886	112.624354	102.0627686	NA
ENSMUSG00000026036	87.99385283	0.08587933	0.3496435	0.245619694	0.805976642	0.927295116	protein_coding	Nif3l1	83.02695451	98.06933788	80.36015487	90.51896404	218.7320615	267.8394361	215.8438116	238.065141	NA
ENSMUSG00000038569	74.73552013	0.095287617	0.390730956	0.243870149	0.807331389	0.927508494	protein_coding	Rad9b	71.61074827	82.53360119	57.40011062	87.39762046	137.5469917	158.7964485	114.4908184	171.4411601	NA
ENSMUSG00000052154	48.97204304	0.113546944	0.467935242	0.242655251	0.808272476	0.927508494	TEC	Gm9870	44.62698805	57.28802906	56.517032	37.45612305	264.7562285	352.3387676	341.8483236	221.8371756	NA
ENSMUSG00000035109	127.2908598	0.069405422	0.295007553	0.235266595	0.814001821	0.931650521	protein_coding	Shc4	127.6539426	133.0247454	123.6310075	124.8537435	135.7515516	138.516147	128.9533057	135.0064695	NA
ENSMUSG00000048911	66.5885241	0.095985242	0.406272349	0.236258366	0.813232191	0.931650521	protein_coding	Rnf24	55.00535737	82.53360119	65.34781825	63.46731962	38.21894002	56.39777888	43.72398072	42.5378822	NA
ENSMUSG00000032513	74.73692314	-0.087680071	0.375003223	-0.233811514	0.815131311	0.931730068	protein_coding	Gorasp1	79.91344372	65.05589741	75.94476175	78.03358969	124.9490303	100.0362202	114.3472757	117.6919312	NA
ENSMUSG00000004071	117.6448578	0.072141247	0.31925995	0.225963975	0.82122944	0.931858346	protein_coding	Cdip1	106.8972039	133.995729	100.6709632	129.015535	212.3530524	260.6396684	196.1511632	260.6013204	NA
ENSMUSG00000028943	180.2269395	0.064232895	0.279942483	0.229450328	0.818518923	0.931858346	protein_coding	Espn	195.1133431	173.8060543	208.4065555	143.581805	484.0424348	424.0518135	497.8778397	343.5958698	NA
ENSMUSG00000030243	48.87991631	0.107602524	0.491012536	0.219144148	0.826537761	0.931858346	protein_coding	Recql	47.74049885	53.40409489	30.90775187	63.46731962	87.52990383	98.08015934	58.8466794	118.8398951	NA
ENSMUSG00000033751	93.1139524	0.078343959	0.346074548	0.226378852	0.820906775	0.931858346	protein_coding	Gadd45gip1	103.7836931	87.38851891	80.36015487	100.9234427	554.6585986	467.8300488	445.9872467	550.8473816	NA
ENSMUSG00000084128	123.4598264	0.066960675	0.299399121	0.223650207	0.823029493	0.931858346	protein_coding	Esrp2	122.4647579	130.1117948	117.4494571	123.8132956	154.9783534	164.9353274	154.3462113	160.0183549	NA
ENSMUSG00000092190	61.6186778	0.092596636	0.410463377	0.225590495	0.821519934	0.931858346	processed_transcript	Gm20470	58.11886816	68.93983158	53.86779612	65.54821534	-231269.2961	-269791.7136	-206416.7769	-251601.8104	NA
ENSMUSG00000095079	89.79607022	0.259956915	1.167502347	0.222660722	0.823799573	0.931858346	IG_C_gene	Igha	37.36212953	158.2703176	39.73853812	123.8132956	-146214.3541	-606478.2892	-152533.3387	-492683.6092	NA
ENSMUSG00000097060	166.2781929	-0.061802847	0.282627175	-0.218672699	0.826905017	0.931858346	antisense	Gm26759	162.9403982	162.1542518	141.29258	198.7255418	-625434.2543	-645251.7203	-552939.6634	-761499.2402	NA
ENSMUSG00000097660	362.6419914	0.044944886	0.204319923	0.219973094	0.825892109	0.931858346	lincRNA	Gm26762	351.8267198	384.5094832	341.7514279	372.4803348	-1376851.835	-1473407.377	-1311786.713	-1482191.026	NA
ENSMUSG00000097737	65.69656277	0.090299877	0.399028128	0.226299527	0.820968466	0.931858346	lincRNA	Gm26530	66.42156361	68.93983158	55.63395337	71.79090252	-254954.0909	-274328.5757	-217719.9925	-275096.5841	NA
ENSMUSG00000101438	139.440535	0.070304147	0.316154815	0.222372532	0.824023892	0.931858346	antisense	Gm19412	145.2971704	140.7926138	168.6680174	103.0043384	-568611.3772	-539505.2266	-647419.2822	-409879.6413	NA
ENSMUSG00000026004	59.48300575	-0.082815788	0.416397644	-0.198886302	0.842351685	0.932145913	protein_coding	Kansl1l	62.27021589	53.40409489	67.1139755	55.14373672	55.3964971	46.72335813	57.49496998	47.32059359	NA
ENSMUSG00000026925	53.1361713	0.094304103	0.437403727	0.215599678	0.829299807	0.932145913	protein_coding	Inpp5e	60.19454202	49.52016071	47.68624575	55.14373672	85.51549939	69.18745012	65.23727447	75.56765981	NA
ENSMUSG00000030303	80.73817143	-0.075675811	0.367585493	-0.205872681	0.836890366	0.932145913	protein_coding	Far2	71.61074827	85.44655182	73.29552587	92.59985977	79.51499522	95.03913441	84.51491059	105.0083315	NA
ENSMUSG00000030785	52.28789261	-0.098915274	0.471548323	-0.209766993	0.833849536	0.932145913	protein_coding	Cox6a2	41.51347726	59.22999615	39.73853812	68.66955893	381.506592	535.3184311	351.6736062	608.7363718	NA
ENSMUSG00000033712	70.51316042	0.078036722	0.393158622	0.198486611	0.842664359	0.932145913	protein_coding	Ccar2	80.95128065	64.08491387	77.710919	59.30552817	83.00732349	65.82420113	82.74843285	62.10555807	NA
ENSMUSG00000034175	94.00799561	0.06623961	0.336897353	0.196616594	0.844127584	0.932145913	protein_coding	Rhbdd3	92.3674869	100.011305	96.25557012	87.39762046	197.0792289	221.2171339	209.3886302	186.1590825	NA
ENSMUSG00000036980	46.02631845	-0.096371865	0.475436079	-0.202702043	0.839367926	0.932145913	protein_coding	Taf6	41.51347726	47.57819363	56.517032	38.49657092	71.44998025	80.53385865	93.67146266	63.91269145	NA
ENSMUSG00000052301	56.8679581	0.084297594	0.425629825	0.198053777	0.843002989	0.932145913	protein_coding	Doc2a	51.89184657	65.05589741	51.21856025	59.30552817	79.73124925	97.87539141	77.18827071	92.65461666	NA
ENSMUSG00000059277	69.10792427	0.083753586	0.39575423	0.2116303	0.832395469	0.932145913	processed_transcript	R74862	83.02695451	59.22999615	64.46473962	69.71000679	167.2927106	123.7221775	132.429775	140.2219266	NA
ENSMUSG00000062328	71.87047938	0.078568908	0.396909784	0.197951552	0.84308297	0.932145913	protein_coding	Rpl17	72.6485852	74.76573284	54.75087475	85.31672473	446.1696591	476.0180355	342.8225913	523.0822006	NA
ENSMUSG00000065952	204.318024	0.05171568	0.249388524	0.207369927	0.835720967	0.932145913	protein_coding	C330021F23Rik	198.2268539	217.5003137	187.2126685	214.3322597	799.5666433	878.7982277	784.1740363	882.9219746	NA
ENSMUSG00000084911	58.05025852	-0.084459191	0.421809772	-0.200230522	0.841300297	0.932145913	antisense	Gm16185	60.19454202	52.43311134	52.9847175	66.5886632	-231052.1449	-208644.2688	-207352.3738	-255162.0491	NA
ENSMUSG00000085334	57.66338889	-0.090481104	0.447303567	-0.202281204	0.839696893	0.932145913	processed_transcript	Gm12940	42.55131419	68.93983158	49.452403	69.71000679	-163052.9882	-264620.2699	-196783.2959	-272805.746	NA
ENSMUSG00000087610	79.86969967	0.078987332	0.365730409	0.215971466	0.82900999	0.932145913	protein_coding	Gm16253	73.68642213	90.30146954	73.29552587	82.19538114	-282360.0528	-346615.2831	-291660.9564	-321666.4767	NA
ENSMUSG00000097300	68.31645305	0.076949089	0.38816618	0.19823749	0.842859257	0.932145913	lincRNA	Gm26835	68.49723747	71.85278221	71.52936862	61.38642389	-262475.5421	-275801.4081	-284632.9816	-240231.9256	NA
ENSMUSG00000097838	263.2207398	0.04733076	0.231541689	0.204415718	0.838028649	0.932145913	lincRNA	C530050E15Rik	291.6321777	243.7168694	271.9882165	245.5456956	-1119407.806	-969809.4718	-1064408.852	-940910.0559	NA
ENSMUSG00000000486	46.02040283	-0.092693134	0.476981631	-0.194332713	0.845915373	0.932948071	protein_coding	1-Sep	43.58915112	45.63622654	57.40011062	37.45612305	116.6781212	119.6129329	150.7017331	101.9474297	NA
ENSMUSG00000009585	50.46743888	-0.086951282	0.453549551	-0.191712861	0.847967131	0.933437533	protein_coding	Apobec3	43.58915112	54.37507843	59.16626787	44.73925809	92.4895645	119.608532	127.9952925	94.76893406	NA
ENSMUSG00000097990	55.27689079	-0.082055441	0.429487494	-0.191054319	0.848483037	0.933437533	antisense	Gm19557	52.9296835	54.37507843	50.33548162	63.46731962	-203166.5412	-216371.8343	-196984.7551	-243201.328	NA
ENSMUSG00000039936	49.18797007	-0.083981888	0.458103212	-0.183325254	0.85454282	0.935275415	protein_coding	Pik3cd	52.9296835	42.72327591	57.40011062	43.69881023	42.38530831	33.49947428	45.08408712	35.58181557	NA
ENSMUSG00000042202	64.17966901	0.074130238	0.404947791	0.183061223	0.854749981	0.935275415	protein_coding	Slc35e2	71.61074827	60.20097969	69.76321137	55.14373672	70.62126673	58.3873021	66.25195675	52.45725282	NA
ENSMUSG00000074210	126.6653238	-0.053904964	0.295955326	-0.182138853	0.855473758	0.935275415	protein_coding	E130208F15Rik	120.389084	128.1698277	128.0464006	130.0559828	185.1949617	197.4990282	204.5476423	204.3219366	NA
ENSMUSG00000084786	113.2115358	0.059548468	0.325116573	0.183160358	0.854672198	0.935275415	protein_coding	Ubl5	108.9728778	122.3439265	128.9294792	92.59985977	-418284.0555	-486836.6273	-504557.4429	-354834.7245	NA
ENSMUSG00000098066	64.87114184	-0.081213212	0.444046875	-0.182893331	0.854881716	0.935275415	antisense	Gm26944	69.53507441	56.31704552	44.15393125	89.47851618	-272121.1591	-215802.0906	-169481.4875	-356057.0621	NA
ENSMUSG00000085684	55.26648871	-0.077009335	0.426986445	-0.180355455	0.856873522	0.93564202	processed_transcript	4930469K13Rik	58.11886816	49.52016071	58.28318925	55.14373672	-231269.2961	-193794.0478	-223336.1848	-211665.0151	NA
ENSMUSG00000028657	87.87466872	0.062293583	0.348055742	0.17897588	0.857956641	0.935662391	protein_coding	Ppt1	87.17830224	92.24343662	79.47707625	92.59985977	149.5034296	154.8943653	133.6839078	161.4713661	NA
ENSMUSG00000035569	86.0753306	-0.063558886	0.359459406	-0.17681798	0.859651365	0.936348885	protein_coding	Ankrd11	97.55667155	70.88179867	87.42478387	88.43806832	71.75010942	54.0440968	65.55497542	64.93333903	NA
ENSMUSG00000028649	90.38111608	-0.06277909	0.360889836	-0.17395638	0.861899743	0.937112473	protein_coding	Macf1	96.51883462	80.5916341	109.5017495	74.91224611	21.86950369	17.95867857	23.89257015	16.37313098	NA
ENSMUSG00000090860	135.7544644	-0.052447531	0.302793507	-0.173212205	0.862484631	0.937112473	antisense	Gm17134	111.0485517	155.3573669	135.1110296	141.5009093	-425528.5303	-596327.3688	-537640.0763	-553754.9471	NA
ENSMUSG00000022668	58.65481072	-0.073802056	0.431795712	-0.170918919	0.86428752	0.937912013	protein_coding	Gtpbp8	52.9296835	61.17196324	47.68624575	72.83135038	160.1987639	181.2882592	141.5622633	224.1406711	NA
ENSMUSG00000089998	89.27990487	0.058097331	0.346329215	0.167751749	0.866778583	0.939455456	antisense	Phtf1os	85.10262838	97.09835434	92.72325562	82.19538114	-326105.9765	-372704.6055	-368968.6798	-321666.4767	NA
ENSMUSG00000018501	69.3093472	0.064935248	0.405353199	0.160194241	0.872728066	0.941261312	protein_coding	Ncor1	62.27021589	79.62065056	81.2432335	54.10328885	31.36960774	39.44681982	39.41221752	26.29083879	NA
ENSMUSG00000058174	127.0055064	-0.04895327	0.302306927	-0.161932348	0.871359129	0.941261312	protein_coding	Gm5148	139.0701488	110.6921239	127.163322	131.0964307	477.4757438	373.7590121	420.4304994	434.1705098	NA
ENSMUSG00000078630	86.22016151	0.058914049	0.367240375	0.160423671	0.872547344	0.941261312	protein_coding	Tomt	74.72425906	100.9822885	72.41244725	96.76165122	141.2699074	186.935011	134.2751882	186.0089135	NA
ENSMUSG00000107962	61.53331603	0.067921448	0.413607649	0.164217099	0.869560241	0.941261312	TEC	Gm43980	72.6485852	53.40409489	61.81550375	58.2650803	-289086.6201	-208993.5809	-236871.7112	-223646.0537	NA
ENSMUSG00000097253	45.33814146	-0.07055832	0.466142169	-0.151366525	0.879686594	0.946443716	antisense	Gm26770	46.70266191	41.75229237	45.03700987	47.86060168	-185841.3986	-163394.9815	-172577.961	-183709.2584	NA
ENSMUSG00000104350	159.2303524	-0.041892957	0.275161183	-0.152248788	0.878990715	0.946443716	TEC	Gm38244	150.4863551	163.1252353	147.4741304	175.8356888	-598822.2845	-638380.3927	-565108.2253	-674931.8406	NA
ENSMUSG00000040936	66.34807401	0.056914727	0.397972165	0.143011829	0.886280839	0.951209838	protein_coding	Ulk4	63.30805282	71.85278221	57.40011062	72.83135038	62.93787048	74.05333436	58.17967839	72.28269649	NA
ENSMUSG00000089875	115.6251383	0.05138838	0.356886109	0.143990979	0.885507593	0.951209838	processed_transcript	Etohd2	120.389084	114.5760581	77.710919	149.8244922	-461320.6497	-439791.4345	-309230.8936	-586328.7676	NA
ENSMUSG00000025085	84.43094379	0.048508308	0.356490639	0.136071758	0.891764554	0.953317672	protein_coding	Ablim1	90.29181303	81.56261765	90.95709837	74.91224611	144.7392848	135.5430159	148.6552133	119.8819399	NA
ENSMUSG00000032575	66.72802282	0.054409604	0.402925053	0.135036538	0.892582985	0.953317672	protein_coding	Manf	58.11886816	77.67868347	58.28318925	72.83135038	266.2110138	368.8575423	272.1809202	333.0351923	NA
ENSMUSG00000033985	55.03327827	-0.060979841	0.441652954	-0.138071852	0.890183631	0.953317672	protein_coding	Tesk2	45.66482498	62.14294678	64.46473962	47.86060168	71.27645405	97.16128209	104.4892392	76.29306208	NA
ENSMUSG00000108806	92.03310628	0.04733112	0.345388558	0.137037313	0.891001302	0.953317672	TEC	RP24-443B5.5	87.17830224	100.011305	99.78788462	81.15493328	-341166.8263	-383234.7471	-383028.1617	-322935.475	NA
ENSMUSG00000091985	48.78434392	-0.058944573	0.452065838	-0.130389354	0.896258389	0.956081461	lincRNA	Gm17354	51.89184657	43.69425945	48.56932437	50.98194527	-198845.1076	-167717.0725	-193269.3085	-199514.6501	NA
ENSMUSG00000064370	131.0611431	-0.037665138	0.297804616	-0.126476006	0.899355141	0.957061948	protein_coding	mt-Cytb	142.1836596	116.5180252	127.163322	138.3795657	494.1343351	398.2410435	425.5711343	463.8946529	NA
ENSMUSG00000085741	83.57362439	0.048984539	0.384981995	0.127238519	0.898751619	0.957061948	processed_transcript	5430405H02Rik	96.51883462	73.7947493	101.5540419	62.42687175	-384072.2239	-288791.13	-389146.3827	-239620.7718	NA
ENSMUSG00000095061	53.40712417	0.053956266	0.440655358	0.1224455	0.902546206	0.959296391	protein_coding	E030018B13Rik	45.66482498	63.11393032	53.86779612	50.98194527	-175280.9375	-251145.8791	-210808.2467	-195358.4438	NA
ENSMUSG00000026156	164.0249999	0.031782611	0.268062582	0.118564147	0.905620671	0.960043692	protein_coding	B3gat2	157.7512136	173.8060543	158.0710739	166.471658	125.4959909	135.9814292	121.0945231	127.7466463	NA
ENSMUSG00000033987	96.73313075	-0.041140063	0.35907145	-0.114573472	0.908783207	0.960043692	protein_coding	Dnah17	101.7080193	89.33048599	120.9817716	74.91224611	57.16773345	52.05271834	69.33000246	42.03504249	NA
ENSMUSG00000041650	53.18469289	-0.05032594	0.440579574	-0.114226675	0.909058107	0.960043692	protein_coding	Pcca	52.9296835	51.4621278	45.9200885	62.42687175	77.66305092	78.28000232	68.69472118	91.44282148	NA
ENSMUSG00000091133	101.3515655	0.038168284	0.330958042	0.115326656	0.908186211	0.960043692	processed_transcript	Gm17108	95.48099769	109.7211404	90.95709837	109.2470256	-373658.905	-420442.0042	-349131.8642	-434720.8317	NA
ENSMUSG00000099708	66.2730487	-0.044824311	0.390993143	-0.114642193	0.908728735	0.960043692	antisense	Gm29361	66.42156361	64.08491387	67.99705412	66.5886632	-259936.6296	-245567.8962	-261001.4907	-264972.6974	NA
ENSMUSG00000102615	506.0427424	-0.026061376	0.230046022	-0.113287663	0.909802498	0.960043692	TEC	Gm37844	538.6373674	465.1011173	626.1027451	394.3297399	-2067518.331	-1850751.94	-2450213.884	-1511037.759	NA
ENSMUSG00000033705	60.06427625	-0.045352158	0.409316254	-0.110799797	0.911775106	0.960971605	protein_coding	Stard9	57.08103123	61.17196324	62.69858237	59.30552817	25.02440431	27.80176045	28.02432478	25.95553651	NA
ENSMUSG00000034493	121.2273853	-0.033908196	0.31606486	-0.107282396	0.91456495	0.962757594	protein_coding	4930556J24Rik	121.426921	118.4599923	143.0587372	101.9638905	395.4072311	379.3664168	448.5996869	320.2787185	NA
ENSMUSG00000020719	57.70720795	0.041529051	0.421474666	0.098532734	0.921509281	0.968907485	protein_coding	Ddx5	55.00535737	62.14294678	62.69858237	50.98194527	296.4498088	335.4865647	350.904511	280.6113222	NA
ENSMUSG00000003813	183.0641227	-0.023788033	0.255266197	-0.093189121	0.925753317	0.972206888	protein_coding	Rad23a	179.5457891	183.5158897	181.9141967	187.2806153	330.617787	350.326189	341.5254577	344.2759717	NA
ENSMUSG00000091306	156.4929977	-0.024891841	0.275671596	-0.090295269	0.92805258	0.973458494	protein_coding	Gm17606	142.1836596	167.980153	154.5387594	161.2694187	-556426.8477	-643685.5462	-593185.2062	-641730.7515	NA
ENSMUSG00000090026	50.22164324	0.038398689	0.45156678	0.085034353	0.93223408	0.97667909	antisense	Gm15996	57.08103123	44.665243	45.03700987	54.10328885	-218729.6184	-171444.1185	-179213.3588	-211729.8327	NA
ENSMUSG00000033760	284.0362007	0.017804608	0.219843132	0.080987784	0.935451668	0.978883352	protein_coding	Rbm4b	294.7456885	276.7303099	270.2220592	294.4467451	617.8911953	601.4080205	577.5516692	616.2177421	NA
ENSMUSG00000005677	72.86753729	0.02477153	0.380257158	0.065144152	0.948059227	0.982348475	protein_coding	Nr1i3	66.42156361	80.5916341	76.82784037	67.62911107	186.3699495	234.4254158	219.7813903	189.4363714	NA
ENSMUSG00000025354	66.23265801	-0.028480326	0.399080204	-0.071364918	0.94310733	0.982348475	protein_coding	Dnajc14	59.15670509	71.85278221	60.0493465	73.87179824	54.74167966	68.92958629	56.65365404	68.24262251	NA
ENSMUSG00000033029	257.8701458	0.015129554	0.229384292	0.065957237	0.947411871	0.982348475	protein_coding	1700088E04Rik	273.9889499	244.6878529	269.3389806	243.4647998	775.5793696	718.0481228	777.3165438	688.0060781	NA
ENSMUSG00000055675	59.9930169	0.029592231	0.448401218	0.065994983	0.94738182	0.982348475	protein_coding	Kbtbd11	76.79993293	44.665243	70.64629	47.86060168	49.76209785	30.00236441	46.66945167	30.95842721	NA
ENSMUSG00000084936	75.90577541	-0.024018711	0.368039488	-0.065261235	0.947966007	0.982348475	antisense	Gm11583	75.76209599	74.76573284	75.06168312	78.03358969	-296490.2181	-286495.8789	-288118.5287	-310514.8798	NA
ENSMUSG00000087381	116.2428024	-0.022242138	0.343432344	-0.064764249	0.948361707	0.982348475	antisense	Gm16008	103.7836931	127.1988442	146.5910517	87.39762046	-412980.8859	-497784.711	-561724.3437	-335469.0806	NA
ENSMUSG00000093772	60.62662785	-0.032876054	0.445998131	-0.073713435	0.941238408	0.982348475	processed_transcript	4931403E22Rik	47.74049885	71.85278221	45.9200885	76.99314183	-183248.2529	-285919.9239	-179705.3906	-295031.1192	NA
ENSMUSG00000096727	54.11996883	0.028689359	0.446964334	0.064187132	0.948821223	0.982348475	protein_coding	Psmb9	57.08103123	52.43311134	65.34781825	41.6179145	-219101.1719	-208644.2688	-255734.5943	-159476.2807	NA
ENSMUSG00000101156	56.11456321	-0.027316833	0.422978549	-0.064582077	0.948506756	0.982348475	antisense	Gm29114	52.9296835	58.2590126	59.16626787	54.10328885	-207137.0017	-223243.542	-227105.1932	-215290.3166	NA
ENSMUSG00000028451	132.6538967	0.017733585	0.291215082	0.060895148	0.951442714	0.983111308	protein_coding	1700022I11Rik	132.8431272	133.995729	125.3971647	138.3795657	262.8620258	260.7577792	238.941415	264.1269903	NA
ENSMUSG00000064032	195.3976657	0.015615299	0.262443475	0.059499664	0.952554133	0.983111308	processed_transcript	Gm10143	171.2430937	221.3842479	181.9141967	207.0491247	205.3799234	265.9676058	226.5669515	253.6068178	NA
ENSMUSG00000085715	239.8465875	-0.269440727	4.563028527	-0.059048662	0.952913349	0.983111308	antisense	Tsix	0	435.0006274	0	524.3857227	0	-1669716.633	0	-2052150.686	NA
ENSMUSG00000031328	73.34765738	-0.019669535	0.38305265	-0.051349429	0.959047081	0.985573189	protein_coding	Flna	78.87560679	66.9978645	83.00939075	64.50776748	37.62247207	31.42846233	38.12824325	29.68032735	NA
ENSMUSG00000031667	99.19200977	0.017203728	0.341181959	0.050423909	0.959784584	0.985573189	protein_coding	Aktip	94.44316076	104.8662227	83.00939075	114.4492649	210.1860213	229.5231517	177.8998151	245.696168	NA
ENSMUSG00000036120	61.10562421	-0.021734676	0.424641686	-0.051183566	0.959179247	0.985573189	protein_coding	Rfxank	62.27021589	59.22999615	75.06168312	47.86060168	211.1703555	196.6761419	249.6694357	165.0339049	NA
ENSMUSG00000102340	130.5170279	-0.014858177	0.292058327	-0.050874005	0.95942592	0.985573189	TEC	Gm37379	127.6539426	132.0537619	133.3448724	129.015535	-499565.71	-506018.6953	-511834.0922	-513384.6012	NA
ENSMUSG00000028466	48.18802169	0.02280705	0.474866003	0.04802839	0.961693616	0.986381201	protein_coding	Creb3	48.77833578	48.54917717	60.0493465	35.37522733	121.9993817	119.4180795	144.6285028	85.34575992	NA
ENSMUSG00000062997	63.10032739	-0.017166879	0.424592122	-0.04043146	0.967749149	0.990905194	protein_coding	Rpl35	46.70266191	78.64966702	63.581661	63.46731962	392.4574492	662.0410756	554.84012	544.6828524	NA
ENSMUSG00000097142	328.3071828	-0.009574901	0.241384994	-0.039666511	0.968359001	0.990905194	lincRNA	Gm26778	277.1024607	376.7416148	281.7020814	377.6825741	-1084423.126	-1443641.572	-1081291.89	-1502892.018	NA
ENSMUSG00000045968	52.41618822	-0.015168621	0.445933815	-0.034015409	0.972864863	0.992854504	protein_coding	Teddm2	48.77833578	55.34606197	44.15393125	61.38642389	247.577827	276.2670249	215.8087748	300.5447606	NA
ENSMUSG00000059479	120.277776	0.010106513	0.303348222	0.033316541	0.973422163	0.992854504	protein_coding	B3gnt8	114.1620625	127.1988442	120.098693	119.6515042	81.18591351	88.5726089	83.77060621	86.52059161	NA
ENSMUSG00000090118	60.95716985	0.013414413	0.424355585	0.031611256	0.974782067	0.992854504	processed_transcript	Gm16163	59.15670509	63.11393032	47.68624575	73.87179824	-235399.1049	-246992.4138	-182729.6058	-283551.2467	NA
ENSMUSG00000097777	58.25006084	0.013608075	0.418274657	0.032533827	0.97404634	0.992854504	antisense	Gm16794	53.96752043	63.11393032	61.81550375	54.10328885	-211198.5115	-241847.1705	-237274.0825	-215290.3166	NA
ENSMUSG00000000078	45.43404387	0.011014902	0.464812359	0.023697523	0.981093882	0.99377449	protein_coding	Klf6	44.62698805	46.60721008	46.80316712	43.69881023	40.51333631	42.38289757	44.12256186	40.51470202	NA
ENSMUSG00000014767	164.9486832	0.007008181	0.269040742	0.026048774	0.979218436	0.99377449	protein_coding	Tbp	173.3187675	157.299334	155.421838	173.754793	366.6335907	325.8148992	322.4728843	373.7368283	NA
ENSMUSG00000030708	71.21961331	-0.009069642	0.387736372	-0.02339126	0.981338176	0.99377449	protein_coding	Dnajb13	65.38372668	76.70769993	80.36015487	62.42687175	105.4285619	121.1113846	127.0936577	102.3534832	NA
ENSMUSG00000084957	145.1239057	-0.008330559	0.300109185	-0.027758426	0.977854824	0.99377449	protein_coding	Bbip1	130.7674534	158.2703176	121.8648502	169.5930016	-511750.2395	-606478.2892	-467768.9055	-674852.3387	NA
ENSMUSG00000089707	50.87639354	0.011598418	0.445774531	0.026018574	0.979242524	0.99377449	antisense	Slain1os	49.81617271	52.43311134	56.517032	44.73925809	-198230.8252	-205193.6976	-216568.4217	-171728.2198	NA
ENSMUSG00000090559	56.97754114	0.006094553	0.419565943	0.014525853	0.988410454	0.996344942	transcribed_processed_pseudogene	Gm17137	53.96752043	60.20097969	56.517032	57.22463244	-214750.0607	-235592.764	-216568.4217	-219652.3742	NA
ENSMUSG00000097346	76.96870395	0.005426181	0.367107294	0.014780914	0.988206967	0.996344942	lincRNA	Gm26619	72.6485852	81.56261765	77.710919	75.95269397	-289086.6201	-319190.1963	-297781.5798	-291538.6057	NA
ENSMUSG00000097731	83.5947437	-0.006430876	0.364930121	-0.017622213	0.985940236	0.996344942	lincRNA	2700016F22Rik	73.68642213	93.21442017	93.60633425	73.87179824	-293216.429	-364788.7958	-358691.4484	-283551.2467	NA
ENSMUSG00000099851	45.43995949	0.007355193	0.465746047	0.015792283	0.987400105	0.996344942	antisense	Gm29542	42.55131419	48.54917717	45.9200885	44.73925809	-163052.9882	-186352.3028	-182727.3462	-175084.2848	NA
ENSMUSG00000026565	293.5078578	0.000830349	0.2192665	0.003786938	0.996978468	0.998113979	protein_coding	Pou2f1	293.7078516	293.2370301	272.8712951	314.2152545	454.0543539	445.8293526	406.2235474	468.5669068	NA
ENSMUSG00000028949	51.6560767	-0.002758672	0.440895651	-0.006256972	0.995007691	0.998113979	protein_coding	Smarcd3	50.85400964	52.43311134	56.517032	46.82015382	115.9659794	117.5895115	124.107978	102.9888704	NA
ENSMUSG00000039264	77.08164974	-0.002915356	0.400366348	-0.007281722	0.994190078	0.998113979	protein_coding	Gimap3	73.68642213	80.5916341	98.904806	55.14373672	131.5533463	149.1599855	180.0268672	98.2818939	NA
ENSMUSG00000047721	121.5377029	0.001349193	0.308045252	0.004379853	0.996505394	0.998113979	protein_coding	Bola2	130.7674534	112.634091	132.4617937	110.2874734	1020.205013	910.9731701	1053.619785	858.9677719	NA
ENSMUSG00000086330	140.6884587	0.001658295	0.285854052	0.005801196	0.995371341	0.998113979	processed_transcript	1700007J10Rik	150.4863551	131.0827784	138.6433441	142.5413572	-576650.8121	-503151.2174	-551696.026	-557826.6747	NA
ENSMUSG00000086682	45.12789757	0.001815482	0.467018553	0.003887387	0.996898321	0.998113979	processed_transcript	Gm16023	44.62698805	45.63622654	42.387774	47.86060168	-177581.7809	-178594.5146	-162426.3163	-183709.2584	NA
ENSMUSG00000086714	132.0561118	0.000406364	0.31527167	0.001288934	0.99897158	0.99897158	processed_transcript	0610009E02Rik	130.7674534	133.0247454	104.2032777	160.2289708	-501940.8665	-529338.2376	-407793.0018	-613983.6806	NA
ENSMUSG00000000001	4.048498353	-1.582773878	1.575752461	-1.004455913	0.315158911	NA	protein_coding	Gnai3	3.113510794	0.970983543	7.947707625	4.16179145	3.713260646	1.159989435	9.843102036	5.069066359	NA
ENSMUSG00000000031	0.480881622	-2.379757052	4.40268867	-0.540523582	0.588836002	NA	lincRNA	H19	0	0	0.883078625	1.040447863	0	0	1.527795268	1.762558363	NA
ENSMUSG00000000049	18.77804447	1.026291602	0.722124307	1.421211821	0.155255189	NA	protein_coding	Apoh	29.05943408	21.36163796	13.24617937	11.44492649	97.99546444	70.84528167	43.01544392	37.22921596	NA
ENSMUSG00000000056	2.004210325	1.664207465	2.169771082	0.766996795	0.443083421	NA	protein_coding	Narf	4.151347726	1.941967087	0.883078625	1.040447863	3.688090658	1.689319274	0.76949597	0.939886129	NA
ENSMUSG00000000085	0.480228889	0.131413897	4.515542493	0.029102571	0.976782785	NA	protein_coding	Scmh1	1.037836931	0	0.883078625	0	1.465118673	0	1.271008789	0	NA
ENSMUSG00000000088	0.722974775	1.096901471	3.528512374	0.310867968	0.755900997	NA	protein_coding	Cox5a	1.037836931	0.970983543	0.883078625	0	6.576128756	6.05076957	5.388346479	0	NA
ENSMUSG00000000125	0.520223931	-2.483189205	4.66840037	-0.531914362	0.59478531	NA	protein_coding	Wnt3	0	0	0	2.080895725	0	0	0	2.706896631	NA
ENSMUSG00000000131	12.66944546	0.06817062	0.917517024	0.074299025	0.940772453	NA	protein_coding	Xpo6	12.45404318	13.59376961	19.42772975	5.202239313	10.66431862	11.66003235	17.27546891	4.54941626	NA
ENSMUSG00000000134	1.485291859	1.06544562	2.415807685	0.44103081	0.659190692	NA	protein_coding	Tfe3	2.075673863	1.941967087	0.883078625	1.040447863	2.656657333	2.576714075	1.152341746	1.329412143	NA
ENSMUSG00000000142	3.923126663	-1.489246128	1.686393773	-0.88309513	0.377184875	NA	protein_coding	Axin2	4.151347726	0	5.29847175	6.242687175	4.074799071	0	5.008211527	5.910724515	NA
ENSMUSG00000000148	0.722974775	1.096901471	3.528512374	0.310867968	0.755900997	NA	protein_coding	Brat1	1.037836931	0.970983543	0.883078625	0	1.218940527	1.116664376	1.017295843	0	NA
ENSMUSG00000000149	8.793683207	-0.437953679	1.035547455	-0.422919951	0.672353666	NA	protein_coding	Gna12	5.189184657	9.709835434	8.83078625	11.44492649	10.55441123	19.78262237	18.65173793	23.7733562	NA
ENSMUSG00000000167	0.700998545	-0.805726255	3.846518913	-0.209468944	0.834082177	NA	protein_coding	Pih1d2	1.037836931	0	1.76615725	0	3.202297163	0	5.55606575	0	NA
ENSMUSG00000000168	2.2095721	-0.294186695	2.000550941	-0.147052839	0.883090314	NA	protein_coding	Dlat	1.037836931	2.91295063	1.76615725	3.121343588	1.020461789	2.816814892	1.672291371	2.960474077	NA
ENSMUSG00000000182	0.259459233	1.543782485	4.991667435	0.309271903	0.757114702	NA	protein_coding	Fgf23	1.037836931	0	0	0	2.235283345	0	0	0	NA
ENSMUSG00000000184	32.37585171	-0.905382015	0.567751869	-1.594679056	0.110784024	NA	protein_coding	Ccnd2	19.7189017	25.24557213	33.55698775	50.98194527	61.43182186	78.78308734	108.5622132	162.2070326	NA
ENSMUSG00000000194	3.749696811	-1.987360927	1.676650413	-1.185316218	0.235892443	NA	protein_coding	Gpr107	2.075673863	0.970983543	8.83078625	3.121343588	2.029372222	0.98415251	8.802529028	3.046541276	NA
ENSMUSG00000000202	0.220769656	-1.342306881	4.991527626	-0.268917049	0.787993517	NA	protein_coding	Btbd17	0	0	0.883078625	0	0	0	1.969663323	0	NA
ENSMUSG00000000244	16.41245024	-0.42147876	0.765418436	-0.550651435	0.581872642	NA	protein_coding	Tspan32	14.52971704	13.59376961	22.96004425	14.56627008	37.09141404	33.97923014	57.48882811	37.81003102	NA
ENSMUSG00000000248	2.711777219	0.29745204	1.804754459	0.164815794	0.869088972	NA	protein_coding	Clec2g	2.075673863	3.883934174	1.76615725	3.121343588	5.615110699	10.52466235	4.961507133	8.623496405	NA
ENSMUSG00000000253	0.684285198	-0.84647622	3.881572114	-0.218075614	0.827370198	NA	protein_coding	Gmpr	0	0.970983543	1.76615725	0	0	2.594884322	4.641870915	0	NA
ENSMUSG00000000263	0.260111966	-1.461880636	4.983578111	-0.293339565	0.769262614	NA	protein_coding	Glra1	0	0	0	1.040447863	0	0	0	1.95194503	NA
ENSMUSG00000000275	4.578595317	-0.7124237	1.421496958	-0.501178491	0.616245511	NA	protein_coding	Trim25	2.075673863	4.854917717	6.181550375	5.202239313	1.486643425	3.404763635	4.34249785	3.788614931	NA
ENSMUSG00000000276	3.728943386	-0.146113838	1.551027024	-0.094204573	0.924946652	NA	protein_coding	Dgke	4.151347726	2.91295063	2.649235875	5.202239313	2.343144588	1.646949207	1.552800454	2.998768267	NA
ENSMUSG00000000278	1.225832626	0.637377216	2.620199021	0.243255268	0.807807654	NA	protein_coding	Scpep1	1.037836931	1.941967087	0.883078625	1.040447863	1.998323386	3.876380994	1.733570552	1.999953357	NA
ENSMUSG00000000282	9.88631197	-2.798966673	1.123997166	-2.490190152	0.012767477	NA	protein_coding	Mnt	1.037836931	3.883934174	15.89541525	18.72806153	0.902296015	3.320850592	13.30781486	15.7059715	NA
ENSMUSG00000000290	20.22150739	-0.380187426	0.709059165	-0.536185758	0.591830175	NA	protein_coding	Itgb2	19.7189017	15.53573669	30.02467325	15.60671794	26.8133033	20.68506296	40.04427085	21.5785184	NA
ENSMUSG00000000295	0.502205119	2.509874644	4.327787919	0.579944002	0.561952381	NA	protein_coding	Hddc2	1.037836931	0.970983543	0	0	5.492958774	5.147853667	0	0	NA
ENSMUSG00000000303	0.519571198	0.020044196	4.38467679	0.004571419	0.996352548	NA	protein_coding	Cdh1	1.037836931	0	0	1.040447863	0.89944856	0	0	0.900182212	NA
ENSMUSG00000000317	0.220769656	-1.342306881	4.991527626	-0.268917049	0.787993517	NA	protein_coding	Bcl6b	0	0	0.883078625	0	0	0	0.996725063	0	NA
ENSMUSG00000000320	0.921768202	-1.391049049	3.458944978	-0.402159924	0.687566334	NA	protein_coding	Alox12	1.037836931	0	2.649235875	0	1.554050062	0	3.890908456	0	NA
ENSMUSG00000000325	4.790714745	-0.139324122	1.426010967	-0.097701999	0.922168928	NA	protein_coding	Arvcf	5.189184657	3.883934174	1.76615725	8.323582901	4.330250601	3.246555797	1.530482329	7.093602008	NA
ENSMUSG00000000326	7.276665767	-1.130370253	1.261624403	-0.895964164	0.370271903	NA	protein_coding	Comt	7.26485852	1.941967087	16.77849387	3.121343588	22.8476884	6.331475225	53.7989226	9.79985338	NA
ENSMUSG00000000339	1.021776317	1.610950175	3.093684745	0.520722151	0.602560341	NA	protein_coding	Rtca	2.075673863	0.970983543	0	1.040447863	5.661149909	2.604443653	0	2.737271782	NA
ENSMUSG00000000346	18.4825066	0.572826174	0.71421244	0.80203892	0.422530445	NA	protein_coding	Dazap2	22.83241249	21.36163796	14.129258	15.60671794	48.77358975	44.68120383	29.60375327	33.89900434	NA
ENSMUSG00000000355	1.740140942	-0.314594747	2.378487975	-0.132266696	0.894773348	NA	protein_coding	Mcts1	3.113510794	0	1.76615725	2.080895725	14.40036989	0	8.48276989	9.829155226	NA
ENSMUSG00000000365	0.242745886	1.495318361	4.995051494	0.299359949	0.764665418	NA	protein_coding	Rnf17	0	0.970983543	0	0	0	0.745184717	0	0	NA
ENSMUSG00000000374	6.230831341	-1.622203602	1.310515639	-1.237836126	0.21577683	NA	protein_coding	Trappc10	5.189184657	0.970983543	11.48002212	7.283135038	4.071986648	0.749336086	8.674908431	5.512868608	NA
ENSMUSG00000000378	7.382465817	-1.193119094	1.158103592	-1.030235207	0.302899606	NA	protein_coding	Ccm2	3.113510794	5.82590126	7.064629	13.52582221	6.625627793	12.1393987	14.74553453	29.26730786	NA
ENSMUSG00000000384	2.186290405	0.438706738	2.005804081	0.218718639	0.826869229	NA	protein_coding	Tbrg4	3.113510794	1.941967087	2.649235875	1.040447863	3.997556193	2.497601645	3.53223732	1.364291356	NA
ENSMUSG00000000385	0.905054855	-1.428454698	3.481969908	-0.410243263	0.681627507	NA	protein_coding	Tmprss2	0	0.970983543	2.649235875	0	0	1.21770651	3.267449949	0	NA
ENSMUSG00000000386	0.260111966	-1.461880636	4.983578111	-0.293339565	0.769262614	NA	protein_coding	Mx1	0	0	0	1.040447863	0	0	0	1.308545062	NA
ENSMUSG00000000392	0.260111966	-1.461880636	4.983578111	-0.293339565	0.769262614	NA	protein_coding	Fap	0	0	0	1.040447863	0	0	0	1.581435599	NA
ENSMUSG00000000399	7.164348112	-0.058960944	1.134744263	-0.051959675	0.958560824	NA	protein_coding	Ndufa9	6.227021589	7.767868347	5.29847175	9.364030763	19.93434663	24.90924682	17.61397206	30.61449288	NA
ENSMUSG00000000409	41.85610834	-1.034336849	0.500739816	-2.065617344	0.038864625	NA	protein_coding	Lck	23.87024942	31.07147339	63.581661	48.90104954	42.68536056	57.60123373	115.9202649	87.29775438	NA
ENSMUSG00000000411	0.970983543	3.465694343	3.618918856	0.957660141	0.338234162	NA	protein_coding	Tssk3	0	3.883934174	0	0	0	14.8432941	0	0	NA
ENSMUSG00000000420	5.019481897	-0.607877145	1.357600532	-0.447758476	0.654327515	NA	protein_coding	Galnt1	3.113510794	4.854917717	7.947707625	4.16179145	4.50111914	6.872415405	11.26954849	6.117766379	NA
ENSMUSG00000000440	0.502857851	-0.02547562	4.438514814	-0.005739672	0.995420429	NA	protein_coding	Pparg	0	0.970983543	0	1.040447863	0	2.175553354	0	2.244880077	NA
ENSMUSG00000000489	0.463515542	0.085921865	4.576464125	0.018774727	0.985020815	NA	protein_coding	Pdgfb	0	0.970983543	0.883078625	0	0	1.27420378	1.201363223	0	NA
ENSMUSG00000000530	4.888847324	-0.807118877	1.386311801	-0.582205877	0.560428015	NA	protein_coding	Acvrl1	5.189184657	1.941967087	6.181550375	6.242687175	10.31768369	4.002882938	12.53100765	12.3913194	NA
ENSMUSG00000000531	0.723627508	-0.948687464	3.532958224	-0.26852496	0.788295265	NA	protein_coding	Grasp	0	0.970983543	0.883078625	1.040447863	0	1.88019955	1.674360014	1.976090812	NA
ENSMUSG00000000532	8.312801585	-0.294064153	1.061885772	-0.276926352	0.781836658	NA	protein_coding	Acvr1b	5.189184657	9.709835434	7.947707625	10.40447863	4.632196438	8.487056799	6.958637717	9.443883205	NA
ENSMUSG00000000538	1.684085286	-0.291823204	2.27007301	-0.128552343	0.897711878	NA	protein_coding	Tom1l2	2.075673863	0.970983543	2.649235875	1.040447863	1.64555794	0.771086388	2.181020437	0.842397342	NA
ENSMUSG00000000552	0.480881622	-2.379757052	4.40268867	-0.540523582	0.588836002	NA	protein_coding	Zfp385a	0	0	0.883078625	1.040447863	0	0	1.501248	1.731931806	NA
ENSMUSG00000000555	1.684085286	-0.291823204	2.27007301	-0.128552343	0.897711878	NA	protein_coding	Itga5	2.075673863	0.970983543	2.649235875	1.040447863	1.873353984	0.86184697	2.302482369	0.905801663	NA
ENSMUSG00000000561	0.480881622	-2.379757052	4.40268867	-0.540523582	0.588836002	NA	protein_coding	Wdr77	0	0	0.883078625	1.040447863	0	0	1.702476017	2.079456754	NA
ENSMUSG00000000563	24.73550347	0.42775038	0.646144622	0.662004086	0.507968603	NA	protein_coding	Atp5f1	37.36212953	19.41967087	20.31080837	21.84940511	104.0090646	54.15250352	58.71537292	62.11861867	NA
ENSMUSG00000000581	0.259459233	1.543782485	4.991667435	0.309271903	0.757114702	NA	protein_coding	C1d	1.037836931	0	0	0	1.394263625	0	0	0	NA
ENSMUSG00000000594	3.088040575	-2.368445112	1.860192253	-1.273225984	0.202937863	NA	protein_coding	Gm2a	1.037836931	0.970983543	6.181550375	4.16179145	2.008659662	1.840121514	11.73462327	8.190303456	NA
ENSMUSG00000000600	4.450571675	-2.998002276	1.738403848	-1.724571814	0.084604667	NA	protein_coding	Krit1	0	1.941967087	4.415393125	11.44492649	0	2.587328049	6.098555062	15.54633915	NA
ENSMUSG00000000605	3.131340301	-0.597036814	1.683840334	-0.354568543	0.722912846	NA	protein_coding	Clcn4	2.075673863	2.91295063	4.415393125	3.121343588	1.752984674	2.550351654	3.80184037	2.631621793	NA
ENSMUSG00000000617	1.520676752	-2.300582836	2.717354901	-0.846625825	0.397203715	NA	protein_coding	Grm6	1.037836931	0	0.883078625	4.16179145	0.98941276	0	0.810704741	3.827196483	NA
ENSMUSG00000000627	0.259459233	1.543782485	4.991667435	0.309271903	0.757114702	NA	protein_coding	Sema4f	1.037836931	0	0	0	1.195088962	0	0	0	NA
ENSMUSG00000000628	1.225832626	0.637377216	2.620199021	0.243255268	0.807807654	NA	protein_coding	Hk2	1.037836931	1.941967087	0.883078625	1.040447863	0.721237242	1.351848406	0.637284626	0.738434449	NA
ENSMUSG00000000631	8.969847672	-0.644647956	1.01536527	-0.634892659	0.525498425	NA	protein_coding	Myo18a	6.227021589	7.767868347	11.48002212	10.40447863	3.279630355	4.241254397	6.164427504	5.470509079	NA
ENSMUSG00000000673	5.538400362	-0.277716981	1.284409906	-0.216221457	0.828815129	NA	protein_coding	Haao	5.189184657	4.854917717	7.947707625	4.16179145	16.7605879	15.42160426	24.7199142	12.96649198	NA
ENSMUSG00000000682	21.54534892	-0.610486787	0.667957721	-0.913960221	0.360737748	NA	protein_coding	Cd52	17.64322783	16.50672024	29.14159462	22.88985298	137.2677281	125.7501728	222.3812758	181.0822361	NA
ENSMUSG00000000686	37.37300213	0.449170375	0.528693177	0.849586101	0.395555242	NA	protein_coding	Abhd15	40.47564033	45.63622654	23.84312287	39.53701878	235.3553626	265.8136033	143.9721708	234.7885387	NA
ENSMUSG00000000693	25.24627831	0.167567814	0.666522141	0.251406222	0.801500057	NA	protein_coding	Loxl3	14.52971704	38.83934174	24.7262015	22.88985298	15.33229069	42.48833271	26.60190821	24.11325206	NA
ENSMUSG00000000708	3.693558494	1.081642062	1.570176262	0.688866651	0.490907188	NA	protein_coding	Kat2b	5.189184657	4.854917717	2.649235875	2.080895725	4.772138732	4.390898185	2.346116193	1.845934611	NA
ENSMUSG00000000711	1.242545973	0.662566978	2.609302392	0.253924949	0.79955354	NA	protein_coding	Rab5b	2.075673863	0.970983543	0.883078625	1.040447863	3.270136745	1.497876691	1.364585246	1.666746537	NA
ENSMUSG00000000724	5.232254058	-0.378193383	1.33331271	-0.283649425	0.776679056	NA	protein_coding	Cryba1	5.189184657	3.883934174	3.5323145	8.323582901	28.85995756	21.63742267	20.40050756	47.27695271	NA
ENSMUSG00000000732	0.242745886	1.495318361	4.995051494	0.299359949	0.764665418	NA	protein_coding	Icosl	0	0.970983543	0	0	0	1.942087337	0	0	NA
ENSMUSG00000000738	2.507720909	0.607293221	1.895754804	0.320343759	0.748707754	NA	protein_coding	Spg7	3.113510794	2.91295063	0.883078625	3.121343588	4.962718436	4.566252701	1.355450266	4.799134224	NA
ENSMUSG00000000740	24.4198403	0.626393325	0.647974522	0.966694374	0.33369684	NA	protein_coding	Rpl13	33.21078181	26.21655567	24.7262015	13.52582221	183.0539645	141.4923858	133.6755394	75.80644952	NA
ENSMUSG00000000743	2.509026375	-0.60171124	1.951789513	-0.308286952	0.757863993	NA	protein_coding	Chmp1a	1.037836931	2.91295063	0.883078625	5.202239313	1.856630323	5.219952458	1.640517006	9.504499422	NA
ENSMUSG00000000751	9.015229278	-0.336989658	1.068234266	-0.315464191	0.752409235	NA	protein_coding	Rpa1	7.26485852	8.738851891	15.89541525	4.16179145	9.443143819	11.77583637	21.06525978	5.400483599	NA
ENSMUSG00000000753	2.893204565	0.082670917	1.747750862	0.047301317	0.962273079	NA	protein_coding	Serpinf1	2.075673863	3.883934174	3.5323145	2.080895725	6.203242747	11.41534597	10.1656225	5.998767601	NA
ENSMUSG00000000759	1.02242905	-0.025575053	3.025748082	-0.008452473	0.993255983	NA	protein_coding	Tubgcp3	1.037836931	0.970983543	0	2.080895725	1.100381966	1.008053563	0	2.243402003	NA
ENSMUSG00000000776	2.486397412	-0.552018589	1.888797334	-0.292259301	0.770088374	NA	protein_coding	Polr3d	2.075673863	1.941967087	1.76615725	4.16179145	3.983657671	3.863782756	3.455872896	7.973814033	NA
ENSMUSG00000000787	25.66944265	-0.128593241	0.633330582	-0.203042842	0.839101546	NA	protein_coding	Ddx3x	20.75673863	28.15852276	19.42772975	34.33477946	25.24244771	33.53046778	23.17335441	42.45697548	NA
ENSMUSG00000000791	0.966373394	0.0265784	3.087126312	0.008609431	0.993130753	NA	protein_coding	Il12rb1	0	1.941967087	0.883078625	1.040447863	0	2.627455802	1.238627926	1.435222965	NA
ENSMUSG00000000804	1.00506297	1.583873276	3.109671499	0.509337812	0.610515459	NA	protein_coding	Usp32	1.037836931	1.941967087	0	1.040447863	0.578221594	1.12164388	0	0.578693231	NA
ENSMUSG00000000817	0.242745886	1.495318361	4.995051494	0.299359949	0.764665418	NA	protein_coding	Fasl	0	0.970983543	0	0	0	1.981686201	0	0	NA
ENSMUSG00000000823	3.831686114	-0.239998349	1.549836967	-0.154853932	0.876936472	NA	protein_coding	Zfp512b	4.151347726	2.91295063	6.181550375	2.080895725	3.014666793	2.071289126	4.402933429	1.536536796	NA
ENSMUSG00000000826	5.417721483	-1.745184573	1.372991012	-1.271082299	0.203699372	NA	protein_coding	Dnajc5	2.075673863	2.91295063	11.48002212	5.202239313	2.174953324	3.057461899	12.49161514	5.567032475	NA
ENSMUSG00000000827	7.309820495	-0.748097366	1.177667142	-0.63523668	0.525274064	NA	protein_coding	Tpd52l2	4.151347726	6.796884804	14.129258	4.16179145	15.7924982	26.8052322	54.80075951	15.80537965	NA
ENSMUSG00000000838	1.559366328	-0.999303533	2.751449671	-0.363191645	0.716461728	NA	protein_coding	Fmr1	2.075673863	0	0	4.16179145	2.01306793	0	0	3.893423866	NA
ENSMUSG00000000861	0.982434008	1.693380639	3.134911595	0.540168546	0.589080802	NA	protein_coding	Bcl11a	2.075673863	0.970983543	0.883078625	0	3.480299775	1.59414126	1.452283526	0	NA
ENSMUSG00000000869	2.113521401	0.457639049	2.21481197	0.206626592	0.836301491	NA	protein_coding	Il4	1.037836931	3.883934174	3.5323145	0	6.83316521	25.6154368	24.15111634	0	NA
ENSMUSG00000000876	2.148253561	-0.91476061	2.037330666	-0.448999578	0.653431961	NA	protein_coding	Pxmp4	1.037836931	1.941967087	3.5323145	2.080895725	4.431209868	8.595734719	15.37652012	8.869648535	NA
ENSMUSG00000000884	0.260111966	-1.461880636	4.983578111	-0.293339565	0.769262614	NA	protein_coding	Gnb1l	0	0	0	1.040447863	0	0	0	2.671357545	NA
ENSMUSG00000000902	6.136003447	-0.037887299	1.213696936	-0.031216441	0.975096928	NA	protein_coding	Smarcb1	7.26485852	4.854917717	6.181550375	6.242687175	17.37809832	11.37141107	14.50330578	15.1841017	NA
ENSMUSG00000000903	3.780240607	0.509977062	1.715073708	0.297349939	0.766199359	NA	protein_coding	Vpreb3	3.113510794	5.82590126	6.181550375	0	17.87371754	33.50153757	36.85080448	0	NA
ENSMUSG00000000916	33.14639662	-0.251631058	0.547634234	-0.459487449	0.645884163	NA	protein_coding	Nsun5	35.28645567	25.24557213	33.55698775	38.49657092	88.31037811	62.13645631	80.87264174	92.9346809	NA
ENSMUSG00000000934	0.463515542	0.085921865	4.576464125	0.018774727	0.985020815	NA	protein_coding	Top1mt	0	0.970983543	0.883078625	0	0	1.949044369	1.775604898	0	NA
ENSMUSG00000000938	0.520223931	-2.483189205	4.66840037	-0.531914362	0.59478531	NA	protein_coding	Hoxa10	0	0	0	2.080895725	0	0	0	4.068676046	NA
ENSMUSG00000000957	0.242745886	1.495318361	4.995051494	0.299359949	0.764665418	NA	protein_coding	Mmp14	0	0.970983543	0	0	0	1.486070291	0	0	NA
ENSMUSG00000000958	11.86305224	-0.462624617	0.888676319	-0.520577186	0.602661346	NA	protein_coding	Slc7a7	8.302695451	11.65180252	15.01233662	12.48537435	15.43853779	21.30775676	26.88130234	22.39446466	NA
ENSMUSG00000000959	7.915867465	0.009844058	1.134493049	0.008677055	0.993076799	NA	protein_coding	Oxa1l	4.151347726	11.65180252	4.415393125	11.44492649	10.76609632	29.58827595	11.23137757	30.18037268	NA
ENSMUSG00000000976	5.874586016	0.59688391	1.267487045	0.47091914	0.637698479	NA	protein_coding	Heatr6	9.340532383	4.854917717	6.181550375	3.121343588	6.289249582	3.274508922	4.322247758	2.14640356	NA
ENSMUSG00000000982	1.520676752	-2.300582836	2.717354901	-0.846625825	0.397203715	NA	protein_coding	Ccl3	1.037836931	0	0.883078625	4.16179145	5.029870797	0	4.363475879	20.13589402	NA
ENSMUSG00000001014	0.519571198	0.020044196	4.38467679	0.004571419	0.996352548	NA	protein_coding	Icam4	1.037836931	0	0	1.040447863	4.538251493	0	0	4.388658825	NA
ENSMUSG00000001016	8.006002548	-0.173874147	1.127025622	-0.154277013	0.877391321	NA	protein_coding	Ilf2	6.227021589	8.738851891	3.5323145	13.52582221	13.45985033	18.4957367	7.488825739	29.72801942	NA
ENSMUSG00000001017	10.62273643	-1.321908874	0.973299487	-1.358172784	0.174408864	NA	protein_coding	Chtop	8.302695451	3.883934174	16.77849387	13.52582221	14.48780383	6.788790629	30.40335205	24.10403378	NA
ENSMUSG00000001018	15.98474138	0.174260713	0.777336811	0.224176587	0.822619901	NA	protein_coding	Snapin	14.52971704	19.41967087	18.54465112	11.44492649	35.65933977	49.40898665	46.40238544	28.04090613	NA
ENSMUSG00000001027	0.480228889	0.131413897	4.515542493	0.029102571	0.976782785	NA	protein_coding	Scn4a	1.037836931	0	0.883078625	0	0.635942233	0	0.521078163	0	NA
ENSMUSG00000001029	1.247808856	1.997537723	2.881988982	0.693110812	0.488240013	NA	protein_coding	Icam2	1.037836931	2.91295063	0	1.040447863	3.649155289	10.02891024	0	3.719854804	NA
ENSMUSG00000001034	0.761664352	3.108943136	3.647427028	0.852366096	0.394010932	NA	protein_coding	Mapk7	2.075673863	0.970983543	0	0	2.61595274	1.22580038	0	0	NA
ENSMUSG00000001052	5.766961171	0.615064323	1.376274509	0.446905264	0.654943463	NA	protein_coding	Sec24b	4.151347726	9.709835434	0.883078625	8.323582901	3.409935948	8.268313195	0.73954053	6.825434653	NA
ENSMUSG00000001053	0.519571198	0.020044196	4.38467679	0.004571419	0.996352548	NA	protein_coding	N4bp3	1.037836931	0	0	1.040447863	1.742535383	0	0	1.685096848	NA
ENSMUSG00000001054	16.8551297	0.566645661	0.755484361	0.750042873	0.453228884	NA	protein_coding	Rmnd5b	20.75673863	19.41967087	10.5969435	16.6471658	44.87856174	41.11299117	22.47268343	36.59843887	NA
ENSMUSG00000001056	8.132827989	-1.360512691	1.214096086	-1.120597214	0.262459351	NA	protein_coding	Nhp2	5.189184657	3.883934174	2.649235875	20.80895725	28.00635319	20.99744256	14.8478342	114.6965508	NA
ENSMUSG00000001062	3.100061111	0.486977585	1.940025991	0.251016011	0.801801731	NA	protein_coding	Vps9d1	6.227021589	0.970983543	0	5.202239313	8.507544412	1.375256364	0	7.095403126	NA
ENSMUSG00000001065	4.639913856	-0.42203011	1.416968027	-0.297840249	0.765825093	NA	protein_coding	Zfp276	2.075673863	5.82590126	4.415393125	6.242687175	1.690466172	4.666250458	3.462834209	4.904231924	NA
ENSMUSG00000001082	4.351910045	-0.556872392	1.440792554	-0.386504213	0.699123283	NA	protein_coding	Mfsd10	4.151347726	2.91295063	6.181550375	4.16179145	8.465888144	5.816663419	12.36446496	8.629908071	NA
ENSMUSG00000001089	2.975846601	1.612766438	1.804222819	0.893884292	0.371383803	NA	protein_coding	Luzp1	3.113510794	5.82590126	0.883078625	2.080895725	2.608089727	4.888463511	0.768168636	1.780184743	NA
ENSMUSG00000001095	0.220769656	-1.342306881	4.991527626	-0.268917049	0.787993517	NA	protein_coding	Slc13a2	0	0	0.883078625	0	0	0	1.554598694	0	NA
ENSMUSG00000001098	9.758751135	-0.085443029	0.975198747	-0.087616016	0.930181872	NA	protein_coding	Kctd10	7.26485852	11.65180252	9.713864875	10.40447863	14.06063327	22.17830714	18.10442484	19.42451133	NA
ENSMUSG00000001100	4.963343579	1.627901795	1.404851099	1.15877177	0.246549227	NA	protein_coding	Poldip2	6.227021589	8.738851891	1.76615725	3.121343588	12.3450147	16.96379499	3.434275329	6.292094828	NA
ENSMUSG00000001120	0.242745886	1.495318361	4.995051494	0.299359949	0.764665418	NA	protein_coding	Pcbp3	0	0.970983543	0	0	0	1.836888149	0	0	NA
ENSMUSG00000001123	3.283446656	-1.143714558	1.742704349	-0.6562872	0.511639352	NA	protein_coding	Lgals9	3.113510794	0.970983543	1.76615725	7.283135038	8.380766489	2.709525074	4.846946559	19.57107231	NA
ENSMUSG00000001127	3.893657386	-0.293060816	1.506827818	-0.194488589	0.84579333	NA	protein_coding	Araf	3.113510794	3.883934174	4.415393125	4.16179145	5.29689037	6.498304044	7.2336075	6.8297213	NA
ENSMUSG00000001128	3.598160528	1.145430618	1.735662448	0.659938584	0.509293242	NA	protein_coding	Cfp	4.151347726	5.82590126	4.415393125	0	10.95484784	15.05350924	11.42828641	0	NA
ENSMUSG00000001134	1.03979513	-1.596433333	3.32143994	-0.48064495	0.630768863	NA	protein_coding	Uxt	1.037836931	0	0	3.121343588	6.435116751	0	0	19.76566773	NA
ENSMUSG00000001138	2.936504292	1.662323196	1.811959689	0.917417317	0.358924002	NA	protein_coding	Cnnm3	3.113510794	5.82590126	1.76615725	1.040447863	2.281155376	4.425023198	1.319287229	0.761005348	NA
ENSMUSG00000001143	2.026839287	1.575097636	2.258553389	0.697392253	0.485557348	NA	protein_coding	Lman2l	3.113510794	2.91295063	0	2.080895725	5.550818358	5.107370013	0	3.578565888	NA
ENSMUSG00000001150	14.50159702	0.324501936	0.804369262	0.403424088	0.686636269	NA	protein_coding	Mcm3ap	18.68106477	13.59376961	13.24617937	12.48537435	11.33093259	8.073490361	7.880416344	7.700307	NA
ENSMUSG00000001151	12.43867909	-0.445846451	0.862591429	-0.516868631	0.605247867	NA	protein_coding	Pcnt	10.37836931	10.68081898	14.129258	14.56627008	4.154724355	4.28306588	5.873777563	5.955305656	NA
ENSMUSG00000001156	1.264522203	2.019054458	2.845592218	0.709537524	0.477990974	NA	protein_coding	Mxd1	2.075673863	1.941967087	0	1.040447863	2.921641123	2.83372406	0	1.462012107	NA
ENSMUSG00000001157	3.211330386	-1.745242342	1.869419519	-0.933574473	0.350523438	NA	protein_coding	Gmcl1	0	2.91295063	2.649235875	7.283135038	0	5.836994301	5.197974791	14.31426355	NA
ENSMUSG00000001158	2.283646569	-1.813933147	2.129971385	-0.851623247	0.394423233	NA	protein_coding	Snrnp27	1.037836931	0.970983543	0.883078625	6.242687175	4.386079738	4.018062312	3.660507289	26.82633951	NA
ENSMUSG00000001166	0.519571198	0.020044196	4.38467679	0.004571419	0.996352548	NA	protein_coding	Oas1c	1.037836931	0	0	1.040447863	1.937589356	0	0	1.983789307	NA
ENSMUSG00000001173	1.260564786	-1.966440411	2.88389094	-0.681870588	0.495320785	NA	protein_coding	Ocrl	1.037836931	0	0.883078625	3.121343588	0.944778293	0	0.819606995	2.836646757	NA
ENSMUSG00000001175	10.13693105	1.178521843	0.968211979	1.217214689	0.223522543	NA	protein_coding	Calm1	14.52971704	13.59376961	6.181550375	6.242687175	84.28181344	77.54863857	34.52940397	34.93014167	NA
ENSMUSG00000001211	11.17941977	-0.574441193	0.915520999	-0.627447316	0.53036606	NA	protein_coding	Agpat3	7.26485852	10.68081898	13.24617937	13.52582221	8.067698314	11.61407001	14.42804945	15.27314959	NA
ENSMUSG00000001228	1.684738019	-1.238651091	2.298798884	-0.53882534	0.590007377	NA	protein_coding	Uhrf1	1.037836931	0.970983543	2.649235875	2.080895725	1.149559807	1.077336625	3.047250262	2.353939906	NA
ENSMUSG00000001229	12.38620009	-0.170321765	0.9086232	-0.187450381	0.851307525	NA	protein_coding	Dpp9	16.6053909	6.796884804	16.77849387	9.364030763	21.11595916	8.960238295	21.75305119	11.88741532	NA
ENSMUSG00000001247	16.57442963	-0.269342199	0.749888024	-0.359176557	0.719463013	NA	protein_coding	Lsr	14.52971704	15.53573669	18.54465112	17.68761366	31.05119443	32.65205834	38.16407807	36.46216542	NA
ENSMUSG00000001248	22.24165465	-0.273374967	0.655090083	-0.417308969	0.676452429	NA	protein_coding	Gramd1a	22.83241249	17.47770378	24.7262015	23.93030084	33.71183415	25.26808625	35.80819958	35.92701873	NA
ENSMUSG00000001249	0.983086741	0.06462339	2.878483486	0.022450499	0.982088598	NA	protein_coding	Hpn	1.037836931	0.970983543	0.883078625	1.040447863	2.280987756	2.137680559	2.01547888	2.335375711	NA
ENSMUSG00000001270	3.416733181	1.418919995	1.670035763	0.849634497	0.395528327	NA	protein_coding	Ckb	4.151347726	5.82590126	2.649235875	1.040447863	11.08110618	16.12148577	7.209748741	2.772536173	NA
ENSMUSG00000001280	17.07728748	-0.263304485	0.73963713	-0.355991438	0.721846977	NA	protein_coding	Sp1	14.52971704	16.50672024	18.54465112	18.72806153	7.389739778	8.256392628	9.082504264	9.18791303	NA
ENSMUSG00000001281	41.56470168	-0.012427713	0.50107404	-0.02480215	0.980212776	NA	protein_coding	Itgb7	32.17294487	50.49114426	38.8554595	44.73925809	47.35118652	72.76334578	56.09015006	66.95318957	NA
ENSMUSG00000001285	1.16977697	0.702848611	3.061451879	0.22958016	0.818418025	NA	protein_coding	Myg1	0	2.91295063	1.76615725	0	0	9.540220278	5.996565575	0	NA
ENSMUSG00000001288	18.26581866	-1.043988828	0.745940436	-1.399560577	0.161644946	NA	protein_coding	Rarg	8.302695451	15.53573669	27.37543737	21.84940511	11.50307214	22.31385096	38.66885392	30.22019395	NA
ENSMUSG00000001289	0.961110511	-1.465750497	3.161961056	-0.463557416	0.64296487	NA	protein_coding	Pfdn5	1.037836931	0	1.76615725	1.040447863	6.671742906	0	10.93338155	6.451824766	NA
ENSMUSG00000001305	2.242346061	0.409214422	2.003190747	0.204281306	0.838133677	NA	protein_coding	Rrp15	4.151347726	0.970983543	1.76615725	2.080895725	13.7795075	3.155831807	5.750008058	7.023237315	NA
ENSMUSG00000001313	11.98589566	-0.876070508	0.963365789	-0.909385115	0.363146876	NA	protein_coding	Rnd2	7.26485852	9.709835434	24.7262015	6.242687175	40.17072881	53.78132836	141.97929	35.2530524	NA
ENSMUSG00000001333	25.28574277	-0.593533828	0.624178106	-0.950904594	0.341652809	NA	protein_coding	Sync	23.87024942	16.50672024	32.67390912	28.09209229	46.63014421	31.71232986	61.46471221	52.93536933	NA
ENSMUSG00000001334	1.25925932	0.688463698	2.785369684	0.247171391	0.804775585	NA	protein_coding	Fndc5	3.113510794	0	0.883078625	1.040447863	4.50111914	0	1.252172054	1.529441595	NA
ENSMUSG00000001348	6.563440343	-1.205956429	1.226226313	-0.983469704	0.325376319	NA	protein_coding	Acp5	2.075673863	5.82590126	7.947707625	10.40447863	5.780381035	16.25165431	22.98392939	29.59104326	NA
ENSMUSG00000001349	2.408365526	-1.155342364	1.94099172	-0.59523302	0.551687721	NA	protein_coding	Cnn1	1.037836931	1.941967087	3.5323145	3.121343588	1.677329546	3.253711795	5.82041751	5.036093074	NA
ENSMUSG00000001366	4.672035084	0.234071526	1.385142738	0.168987296	0.865806634	NA	protein_coding	Fbxo9	6.227021589	3.883934174	4.415393125	4.16179145	12.43606181	7.628372978	8.491547274	8.017424402	NA
ENSMUSG00000001380	4.231801237	-0.136264151	1.465781167	-0.092963502	0.925932556	NA	protein_coding	Hars	4.151347726	3.883934174	2.649235875	6.242687175	9.055763293	8.295932443	5.668277174	13.84681738	NA
ENSMUSG00000001383	2.871881069	-0.928524483	1.78770382	-0.519395032	0.603485295	NA	protein_coding	Zmat2	1.037836931	2.91295063	4.415393125	3.121343588	4.550231296	12.79306426	20.1029029	13.97618153	NA
ENSMUSG00000001403	0.242745886	1.495318361	4.995051494	0.299359949	0.764665418	NA	protein_coding	Ube2c	0	0.970983543	0	0	0	5.117593054	0	0	NA
ENSMUSG00000001415	10.0309663	-0.435510673	0.957856549	-0.454672125	0.649345138	NA	protein_coding	Smg5	8.302695451	8.738851891	10.5969435	12.48537435	7.392810667	7.652483689	9.0862786	10.72368637	NA
ENSMUSG00000001416	5.302222825	-0.746998103	1.335226767	-0.55945411	0.575851841	NA	protein_coding	Cct3	2.075673863	5.82590126	7.064629	6.242687175	4.129649046	11.34944291	13.7859878	12.62897325	NA
ENSMUSG00000001418	5.159485054	-0.378615807	1.335877596	-0.283421032	0.776854108	NA	protein_coding	Glmp	3.113510794	5.82590126	4.415393125	7.283135038	7.712156727	14.45525296	11.35742543	18.42410657	NA
ENSMUSG00000001419	23.02317233	-0.626872166	0.673988813	-0.930092835	0.35232302	NA	protein_coding	Mef2d	17.64322783	18.44868732	18.54465112	37.45612305	27.29632423	29.58963013	29.25164483	57.85112962	NA
ENSMUSG00000001420	12.08834938	0.585310886	0.884464622	0.661768567	0.508119554	NA	protein_coding	Tmem79	12.45404318	16.50672024	7.947707625	11.44492649	24.09222475	31.40399413	14.80551011	21.35657503	NA
ENSMUSG00000001424	11.9705534	-0.713377863	0.886572432	-0.804647017	0.421023402	NA	protein_coding	Snd1	10.37836931	7.767868347	14.129258	15.60671794	11.78957863	8.640291902	15.74283774	18.02698867	NA
ENSMUSG00000001435	7.358531389	-0.7264851	1.121728875	-0.647647677	0.517212853	NA	protein_coding	Col18a1	6.227021589	4.854917717	7.947707625	10.40447863	4.720358638	3.686494614	6.256357437	8.054851736	NA
ENSMUSG00000001436	1.520676752	-2.300582836	2.717354901	-0.846625825	0.397203715	NA	protein_coding	Slc19a1	1.037836931	0	0.883078625	4.16179145	2.226128902	0	1.931194689	8.911778746	NA
ENSMUSG00000001440	31.50937917	-0.228741206	0.554933406	-0.412195777	0.680195932	NA	protein_coding	Kpnb1	25.94592329	32.04245693	32.67390912	35.37522733	17.40772576	21.14249681	21.1100352	22.8941332	NA
ENSMUSG00000001441	4.924232216	-1.919483027	1.547988599	-1.239985248	0.214980851	NA	protein_coding	Npepps	4.151347726	0	6.181550375	9.364030763	6.938304227	0	10.13342227	15.91363894	NA
ENSMUSG00000001444	1.181880167	-1.865356717	2.938160633	-0.634872272	0.525511722	NA	protein_coding	Tbx21	1.037836931	0	2.649235875	1.040447863	1.556517476	0	4.126012634	1.593631136	NA
ENSMUSG00000001445	2.943997339	-0.386393365	1.765960885	-0.218800636	0.826805351	NA	protein_coding	Mrpl10	4.151347726	0.970983543	3.5323145	3.121343588	14.51902568	3.520530985	12.59543652	10.8981513	NA
ENSMUSG00000001467	4.746109553	-0.403227456	1.420997191	-0.283763725	0.776591455	NA	protein_coding	Cyp51	6.227021589	1.941967087	3.5323145	7.283135038	5.679315414	1.741867197	3.102343881	6.407462002	NA
ENSMUSG00000001472	9.568607936	-0.211093725	1.037077847	-0.203546654	0.838707784	NA	protein_coding	Tcf25	4.151347726	13.59376961	13.24617937	7.283135038	7.559813564	24.23925538	23.65958411	13.48598826	NA
ENSMUSG00000001473	13.73466979	0.085700867	0.831780594	0.10303302	0.917936764	NA	protein_coding	Tubb6	17.64322783	10.68081898	14.129258	12.48537435	38.3914461	23.28081011	31.92719979	27.74601399	NA
ENSMUSG00000001482	0.242745886	1.495318361	4.995051494	0.299359949	0.764665418	NA	protein_coding	Def8	0	0.970983543	0	0	0	1.222135934	0	0	NA
ENSMUSG00000001493	0.220769656	-1.342306881	4.991527626	-0.268917049	0.787993517	NA	protein_coding	Meox1	0	0	0.883078625	0	0	0	1.597300726	0	NA
ENSMUSG00000001497	0.983739473	-1.565762947	3.140387558	-0.498589081	0.618068899	NA	protein_coding	Pax9	0	0.970983543	0.883078625	2.080895725	0	1.772618247	1.614878394	3.944924628	NA
ENSMUSG00000001506	0.242745886	1.495318361	4.995051494	0.299359949	0.764665418	NA	protein_coding	Col1a1	0	0.970983543	0	0	0	0.837256218	0	0	NA
ENSMUSG00000001507	0.441539312	-2.269171085	4.900751531	-0.463025124	0.643346359	NA	protein_coding	Itga3	0	0	1.76615725	0	0	0	1.461566038	0	NA
ENSMUSG00000001517	0.723627508	-0.948687464	3.532958224	-0.26852496	0.788295265	NA	protein_coding	Foxm1	0	0.970983543	0.883078625	1.040447863	0	1.150259812	1.02433225	1.208923726	NA
ENSMUSG00000001518	3.508826462	-0.397547588	1.624486666	-0.244721976	0.806671711	NA	protein_coding	Itfg2	3.113510794	2.91295063	1.76615725	6.242687175	5.227168387	4.788578765	2.908305234	10.65688133	NA
ENSMUSG00000001520	27.27789092	0.151253573	0.61353156	0.246529409	0.805272442	NA	protein_coding	Nrip2	34.24861874	23.30360504	31.7908305	19.76850939	80.936029	55.16441895	78.01637211	47.71065279	NA
ENSMUSG00000001521	1.186490317	0.726281339	2.817722127	0.257754777	0.796596168	NA	protein_coding	Tulp3	1.037836931	1.941967087	1.76615725	0	1.179294752	2.287615605	2.046105918	0	NA
ENSMUSG00000001524	1.965520748	0.837743706	2.112192828	0.39662274	0.691645681	NA	protein_coding	Gtf2h4	3.113510794	1.941967087	1.76615725	1.040447863	7.463509986	4.578172638	4.076965769	2.405831042	NA
ENSMUSG00000001542	0.520223931	-2.483189205	4.66840037	-0.531914362	0.59478531	NA	protein_coding	Ell2	0	0	0	2.080895725	0	0	0	2.22559582	NA
ENSMUSG00000001552	4.776083278	-0.472411947	1.39377731	-0.338943635	0.734652192	NA	protein_coding	Jup	4.151347726	3.883934174	7.947707625	3.121343588	5.660614808	5.490277451	11.04897196	4.248923996	NA
ENSMUSG00000001555	4.91017082	-0.204669754	1.362442113	-0.150222716	0.880588905	NA	protein_coding	Fkbp10	6.227021589	2.91295063	5.29847175	5.202239313	10.21387187	4.698948833	8.369039378	8.230996559	NA
ENSMUSG00000001558	0.744951005	3.080623449	3.677026233	0.837802957	0.402141378	NA	protein_coding	Klhl10	1.037836931	1.941967087	0	0	2.014637816	3.691196131	0	0	NA
ENSMUSG00000001569	0.700998545	-0.805726255	3.846518913	-0.209468944	0.834082177	NA	protein_coding	Nom1	1.037836931	0	1.76615725	0	1.393448547	0	2.462499949	0	NA
ENSMUSG00000001576	5.449066297	-1.365490662	1.348336744	-1.012722281	0.311192832	NA	protein_coding	Ergic1	4.151347726	1.941967087	5.29847175	10.40447863	13.9045643	6.743076363	18.09357537	34.78976454	NA
ENSMUSG00000001583	4.438509498	1.456579953	1.459916277	0.997714716	0.318417715	NA	protein_coding	Tnk1	6.227021589	6.796884804	2.649235875	2.080895725	9.647207768	10.35592098	3.952363156	3.109736835	NA
ENSMUSG00000001588	11.17480962	-0.840815706	0.91681837	-0.917101723	0.359089338	NA	protein_coding	Acap1	7.26485852	8.738851891	14.129258	14.56627008	12.33965662	14.53408477	23.53909549	25.15745554	NA
ENSMUSG00000001627	0.779683164	-1.00613218	3.700049784	-0.271923958	0.78568049	NA	protein_coding	Ifrd1	1.037836931	0	0	2.080895725	2.182712488	0	0	4.469514328	NA
ENSMUSG00000001630	0.480228889	0.131413897	4.515542493	0.029102571	0.976782785	NA	protein_coding	Stk38l	1.037836931	0	0.883078625	0	1.166688438	0	1.012116824	0	NA
ENSMUSG00000001632	10.90943477	-0.920884141	0.93023044	-0.989952707	0.322197236	NA	protein_coding	Brpf1	8.302695451	6.796884804	15.01233662	13.52582221	7.18383798	5.783688417	12.50836856	11.28893975	NA
ENSMUSG00000001642	2.988602531	0.034404262	1.723170307	0.019965677	0.984070753	NA	protein_coding	Akr1b3	3.113510794	2.91295063	1.76615725	4.16179145	12.45861913	11.41326902	6.93175818	16.93332678	NA
ENSMUSG00000001674	1.507268089	2.337533982	2.676340267	0.873406872	0.382441347	NA	protein_coding	Ddx18	2.075673863	2.91295063	0	1.040447863	3.651884437	5.133672252	0	1.869480052	NA
ENSMUSG00000001687	8.73501662	0.245910448	1.029528825	0.238857274	0.811216257	NA	protein_coding	Ubl3	8.302695451	10.68081898	9.713864875	6.242687175	13.75453663	18.34337951	16.40681997	10.32431683	NA
ENSMUSG00000001700	4.854115164	-0.195611698	1.360470411	-0.143782398	0.885672303	NA	protein_coding	Gramd3	5.189184657	3.883934174	6.181550375	4.16179145	9.879925499	7.272503904	11.3335747	7.6434058	NA
ENSMUSG00000001729	7.345775459	-0.133595251	1.111180724	-0.120228193	0.904302385	NA	protein_coding	Akt1	6.227021589	7.767868347	7.064629	8.323582901	9.03561699	11.03663537	10.0545191	12.28089995	NA
ENSMUSG00000001739	0.220769656	-1.342306881	4.991527626	-0.268917049	0.787993517	NA	protein_coding	Cldn15	0	0	0.883078625	0	0	0	1.869639493	0	NA
ENSMUSG00000001741	30.26899711	0.559988065	0.625854499	0.894757592	0.370916685	NA	protein_coding	Il16	38.39996646	33.98442402	36.20622362	12.48537435	29.24510592	26.83182469	28.11325174	9.492635754	NA
ENSMUSG00000001750	2.411670211	1.36559021	2.065914295	0.661010098	0.508605838	NA	protein_coding	Tcirg1	3.113510794	3.883934174	2.649235875	0	4.741456784	5.816889843	3.885053489	0	NA
ENSMUSG00000001755	0.463515542	0.085921865	4.576464125	0.018774727	0.985020815	NA	protein_coding	Coasy	0	0.970983543	0.883078625	0	0	1.641255271	1.495205007	0	NA
ENSMUSG00000001761	0.220769656	-1.342306881	4.991527626	-0.268917049	0.787993517	NA	protein_coding	Smo	0	0	0.883078625	0	0	0	0.883799655	0	NA
ENSMUSG00000001763	1.040447863	-3.48375261	3.53251959	-0.986194845	0.324037508	NA	protein_coding	Tspan33	0	0	0	4.16179145	0	0	0	8.028003054	NA
ENSMUSG00000001767	1.987496978	1.651022178	2.163356038	0.763176356	0.445358228	NA	protein_coding	Crnkl1	3.113510794	2.91295063	0.883078625	1.040447863	3.964616504	3.647887958	1.082842108	1.27797745	NA
ENSMUSG00000001768	1.265174936	0.550615363	2.751924256	0.200083764	0.841415071	NA	protein_coding	Rin2	1.037836931	1.941967087	0	2.080895725	0.901956437	1.652554164	0	1.838862268	NA
ENSMUSG00000001774	2.706514336	-0.19154377	1.794584492	-0.106734328	0.914999748	NA	protein_coding	Chordc1	3.113510794	1.941967087	2.649235875	3.121343588	5.383892805	3.363759978	4.757203195	5.512266542	NA
ENSMUSG00000001783	2.429689023	0.075299943	1.88486361	0.03994981	0.96813314	NA	protein_coding	Rtcb	2.075673863	2.91295063	2.649235875	2.080895725	4.001665164	5.821872561	5.207241933	4.004929198	NA
ENSMUSG00000001785	3.512131147	1.348629337	1.65432649	0.81521353	0.414950095	NA	protein_coding	Pwp1	5.189184657	4.854917717	0.883078625	3.121343588	8.088148959	7.441996259	1.325453031	4.692925418	NA
ENSMUSG00000001786	1.667371939	-0.315454679	2.277199615	-0.13852746	0.889823569	NA	protein_coding	Fbxo7	1.037836931	1.941967087	2.649235875	1.040447863	2.246410308	4.115847014	5.624385647	2.289932742	NA
ENSMUSG00000001794	11.29691765	-0.197614157	0.930648743	-0.212340218	0.831841622	NA	protein_coding	Capns1	11.41620625	9.709835434	16.77849387	7.283135038	33.11576357	28.21382328	50.54183279	21.57614903	NA
ENSMUSG00000001802	1.854062168	0.124492556	2.522974037	0.049343574	0.960645495	NA	protein_coding	Lrp3	0	3.883934174	3.5323145	0	0	5.579469684	4.990430175	0	NA
ENSMUSG00000001827	0.242745886	1.495318361	4.995051494	0.299359949	0.764665418	NA	protein_coding	Folr1	0	0.970983543	0	0	0	2.916257321	0	0	NA
ENSMUSG00000001829	1.02242905	-0.025575053	3.025748082	-0.008452473	0.993255983	NA	protein_coding	Clpb	1.037836931	0.970983543	0	2.080895725	1.885566312	1.727356407	0	3.844195355	NA
ENSMUSG00000001833	2.673087642	-0.22070887	1.836492435	-0.120179569	0.904340902	NA	protein_coding	7-Sep	1.037836931	3.883934174	2.649235875	3.121343588	1.674837714	6.278451977	4.439655625	5.144317818	NA
ENSMUSG00000001844	0.220769656	-1.342306881	4.991527626	-0.268917049	0.787993517	NA	protein_coding	Zdhhc4	0	0	0.883078625	0	0	0	2.579009624	0	NA
ENSMUSG00000001847	41.6845534	-0.008690775	0.499949402	-0.017383309	0.986130825	NA	protein_coding	Rac1	41.51347726	41.75229237	51.21856025	32.25388374	161.7946664	160.034262	192.2283371	121.2576547	NA
ENSMUSG00000001865	3.871681156	-0.653770034	1.520015127	-0.430107584	0.667117383	NA	protein_coding	Cpa3	3.113510794	2.91295063	5.29847175	4.16179145	8.154959984	7.642609819	14.41143169	11.13254286	NA
ENSMUSG00000001891	10.34717494	0.796158576	0.964380495	0.825564786	0.409051018	NA	protein_coding	Ugp2	16.6053909	9.709835434	8.83078625	6.242687175	34.1761516	20.71733381	18.53014958	12.82651051	NA
ENSMUSG00000001901	3.936304379	1.215389249	1.530799071	0.793957399	0.427220232	NA	protein_coding	Kcnh6	5.189184657	5.82590126	2.649235875	2.080895725	7.296482082	8.05628966	3.587153628	2.822388361	NA
ENSMUSG00000001909	5.342217867	-1.066911094	1.377272182	-0.774655226	0.438543415	NA	protein_coding	Trmt1	1.037836931	5.82590126	6.181550375	8.323582901	1.916710636	10.53532525	11.19745552	15.63076318	NA
ENSMUSG00000001910	8.571608085	-0.024668193	1.032814492	-0.023884437	0.980944788	NA	protein_coding	Nacc1	7.26485852	9.709835434	7.947707625	9.364030763	6.465005821	8.655471563	7.344609113	8.510345558	NA
ENSMUSG00000001911	36.0734913	-0.484384172	0.519292523	-0.932777097	0.350935069	NA	protein_coding	Nfix	29.05943408	31.07147339	41.50469537	42.65836237	42.84325515	47.49032003	62.38756525	62.78593727	NA
ENSMUSG00000001918	30.59091565	-0.007652014	0.563075828	-0.013589668	0.989157347	NA	protein_coding	Slc1a5	26.98376022	33.98442402	29.14159462	32.25388374	48.35623973	59.89458011	50.28961604	55.75503961	NA
ENSMUSG00000001930	0.502857851	-0.02547562	4.438514814	-0.005739672	0.995420429	NA	protein_coding	Vwf	0	0.970983543	0	1.040447863	0	1.698744784	0	1.855846651	NA
ENSMUSG00000001942	1.485291859	1.06544562	2.415807685	0.44103081	0.659190692	NA	protein_coding	Siae	2.075673863	1.941967087	0.883078625	1.040447863	2.972878859	2.883419967	1.289504812	1.487651872	NA
ENSMUSG00000001943	1.00506297	1.583873276	3.109671499	0.509337812	0.610515459	NA	protein_coding	Vsig2	1.037836931	1.941967087	0	1.040447863	4.412188952	8.119408739	0	4.266751635	NA
ENSMUSG00000001946	0.480881622	-2.379757052	4.40268867	-0.540523582	0.588836002	NA	protein_coding	Esam	0	0	0.883078625	1.040447863	0	0	1.858349644	2.269845612	NA
ENSMUSG00000001948	0.260111966	-1.461880636	4.983578111	-0.293339565	0.769262614	NA	protein_coding	Spa17	0	0	0	1.040447863	0	0	0	7.23219814	NA
ENSMUSG00000001962	5.150917488	-2.041733254	1.42134488	-1.436479831	0.150865851	NA	protein_coding	Fam50a	2.075673863	1.941967087	6.181550375	10.40447863	5.729820454	5.557400584	17.39741839	28.67247045	NA
ENSMUSG00000001964	1.909465092	0.883102586	2.277318391	0.387781783	0.698177528	NA	protein_coding	Emd	2.075673863	2.91295063	2.649235875	0	8.372648472	11.55565116	10.29056743	0	NA
ENSMUSG00000001983	0.779683164	-1.00613218	3.700049784	-0.271923958	0.78568049	NA	protein_coding	Taco1	1.037836931	0	0	2.080895725	3.03097749	0	0	6.179400593	NA
ENSMUSG00000001986	0.502205119	2.509874644	4.327787919	0.579944002	0.561952381	NA	protein_coding	Gria3	1.037836931	0.970983543	0	0	0.963747038	0.903197881	0	0	NA
ENSMUSG00000001988	5.290119627	-0.213335985	1.394495722	-0.152984323	0.878410638	NA	protein_coding	Npas1	1.037836931	8.738851891	6.181550375	5.202239313	1.895174915	16.54331342	11.50861573	9.48360375	NA
ENSMUSG00000001995	1.567363823	-2.424117703	2.880319686	-0.841614115	0.400003986	NA	protein_coding	Sipa1l2	0	0.970983543	5.29847175	0	0	0.597747883	3.193847653	0	NA
ENSMUSG00000001998	0.502857851	-0.02547562	4.438514814	-0.005739672	0.995420429	NA	protein_coding	Ap4e1	0	0.970983543	0	1.040447863	0	1.692392859	0	1.883192357	NA
ENSMUSG00000001999	1.523981436	2.35411057	2.6684118	0.882214121	0.377661027	NA	protein_coding	Blvra	3.113510794	1.941967087	0	1.040447863	11.28732872	7.052121202	0	3.852154733	NA
ENSMUSG00000002006	14.48461171	0.493160402	0.818085242	0.602822758	0.546626605	NA	protein_coding	Pdzd4	12.45404318	21.36163796	10.5969435	13.52582221	12.55848996	22.3310707	10.89464725	13.616128	NA
ENSMUSG00000002007	21.37006751	0.39683193	0.694461788	0.571423708	0.567712462	NA	protein_coding	Srpk3	32.17294487	16.50672024	21.193887	15.60671794	64.78951145	32.69130361	41.09977638	30.3163932	NA
ENSMUSG00000002010	5.800387865	0.627364571	1.352873213	0.463727543	0.642842962	NA	protein_coding	Idh3g	6.227021589	7.767868347	0.883078625	8.323582901	18.63077907	22.75673211	2.591460054	25.32231435	NA
ENSMUSG00000002014	0.480881622	-2.379757052	4.40268867	-0.540523582	0.588836002	NA	protein_coding	Ssr4	0	0	0.883078625	1.040447863	0	0	4.581469918	5.308640877	NA
ENSMUSG00000002015	1.181880167	-1.865356717	2.938160633	-0.634872272	0.525511722	NA	protein_coding	Bcap31	1.037836931	0	2.649235875	1.040447863	3.265293173	0	8.498048106	3.267956571	NA
ENSMUSG00000002017	2.347046987	-1.88581254	2.056130028	-0.917165993	0.359055664	NA	protein_coding	Fam98a	1.037836931	0.970983543	5.29847175	2.080895725	1.512750498	1.391898641	7.437102393	2.92577255	NA
ENSMUSG00000002020	1.44594955	1.149959352	2.583955337	0.445038401	0.656292003	NA	protein_coding	Ltbp2	2.075673863	1.941967087	1.76615725	0	1.204570279	1.103499874	1.00530281	0	NA
ENSMUSG00000002031	1.208466547	2.073190893	2.912942537	0.711717058	0.476640002	NA	protein_coding	Ift46	1.037836931	2.91295063	0.883078625	0	2.845469765	8.279534477	2.46848064	0	NA
ENSMUSG00000002032	2.74455118	0.889056767	1.820865962	0.488260413	0.625365398	NA	protein_coding	Tmem25	5.189184657	1.941967087	1.76615725	2.080895725	8.672425155	3.191838127	2.842403686	3.354623713	NA
ENSMUSG00000002033	21.84733146	-0.437278126	0.664654875	-0.657902534	0.510600762	NA	protein_coding	Cd3g	17.64322783	19.41967087	21.193887	29.13254015	88.0684531	94.91647195	103.764176	147.8642285	NA
ENSMUSG00000002043	1.243198706	-0.551546057	2.609224552	-0.211383132	0.832588318	NA	protein_coding	Trappc6a	1.037836931	0.970983543	0.883078625	2.080895725	5.705741969	5.347268372	5.041588848	11.68357978	NA
ENSMUSG00000002052	26.11441033	0.156105516	0.604561693	0.258212714	0.796242746	NA	protein_coding	Supt6	25.94592329	29.1295063	26.49235875	22.88985298	16.76905906	19.51734007	17.45684238	14.76880862	NA
ENSMUSG00000002055	1.005715703	-0.068238834	3.267709648	-0.020882772	0.98333917	NA	protein_coding	Spag5	0	1.941967087	0	2.080895725	0	1.977560911	0	2.078417658	NA
ENSMUSG00000002058	0.662308969	-2.85341927	4.211512459	-0.677528393	0.498070761	NA	protein_coding	Unc119	0	0	2.649235875	0	0	0	7.907378888	0	NA
ENSMUSG00000002064	7.946683228	0.78774614	1.084463148	0.726392723	0.467598051	NA	protein_coding	Sdf2	10.37836931	9.709835434	4.415393125	7.283135038	41.21142127	38.62223891	18.20718874	29.53584753	NA
ENSMUSG00000002068	5.495017975	0.856949778	1.304220697	0.657058871	0.511143064	NA	protein_coding	Ccne1	8.302695451	5.82590126	2.649235875	5.202239313	17.58789259	12.79398264	5.721643868	11.00139905	NA
ENSMUSG00000002083	5.289466895	0.065623091	1.356377747	0.048381132	0.961412496	NA	protein_coding	Bbc3	2.075673863	8.738851891	6.181550375	4.16179145	4.642843011	19.22369287	13.31487978	8.979605465	NA
ENSMUSG00000002100	15.80400779	0.981952492	0.821689217	1.195041228	0.232070922	NA	protein_coding	Mybpc3	20.75673863	21.36163796	15.89541525	5.202239313	19.37512146	19.52438054	14.55297209	4.937624803	NA
ENSMUSG00000002102	12.33601902	-1.334978313	0.889910063	-1.500127223	0.13358145	NA	protein_coding	Psmc3	6.227021589	7.767868347	17.6615725	17.68761366	16.89901764	21.11640824	49.77319302	49.02221558	NA
ENSMUSG00000002105	6.334144141	-0.118897201	1.214362652	-0.097909138	0.922004444	NA	protein_coding	Slc39a13	8.302695451	3.883934174	7.947707625	5.202239313	14.68702861	6.756849593	13.53853492	8.876816027	NA
ENSMUSG00000002107	17.65948269	-0.35213864	0.736266504	-0.478276056	0.632453736	NA	protein_coding	Celf2	13.49188011	17.47770378	16.77849387	22.88985298	22.4249853	28.44470699	27.35313878	38.68522605	NA
ENSMUSG00000002108	1.927483905	-0.665234222	2.124213332	-0.313167332	0.754153536	NA	protein_coding	Nr1h3	1.037836931	1.941967087	2.649235875	2.080895725	2.275115648	4.264354754	6.03087087	4.658727177	NA
ENSMUSG00000002111	0.779030431	1.039287886	3.69579176	0.281208454	0.778550521	NA	protein_coding	Spi1	2.075673863	0	0	1.040447863	6.03773225	0	0	2.919356382	NA
ENSMUSG00000002129	12.96155497	0.020198386	0.843029544	0.023959285	0.980885085	NA	protein_coding	Sf3a1	13.49188011	12.62278606	13.24617937	12.48537435	17.56474647	16.09096278	16.91432011	16.52773811	NA
ENSMUSG00000002147	21.59064786	-0.003308136	0.672428193	-0.004919687	0.996074674	NA	protein_coding	Stat6	22.83241249	20.39065441	26.49235875	16.6471658	98.19511487	87.84283632	118.316075	73.11744202	NA
ENSMUSG00000002204	1.42397332	0.17266298	2.603420598	0.066321585	0.947121799	NA	protein_coding	Napsa	2.075673863	0.970983543	2.649235875	0	5.290382033	2.565592799	6.884208957	0	NA
ENSMUSG00000002205	1.221222477	-1.916963728	2.884949121	-0.66447055	0.506389192	NA	protein_coding	Vrk3	1.037836931	0	1.76615725	2.080895725	2.225112532	0	3.646424126	4.303533977	NA
ENSMUSG00000002210	5.543010512	0.225615878	1.291093294	0.174747928	0.861277706	NA	protein_coding	Smg9	5.189184657	6.796884804	7.064629	3.121343588	13.37783214	17.15749664	17.8636614	8.182210271	NA
ENSMUSG00000002221	1.385936476	-2.207022729	2.7881512	-0.79157211	0.428610214	NA	protein_coding	Paxip1	0	0.970983543	3.5323145	1.040447863	0	0.734682842	2.770737179	0.802627154	NA
ENSMUSG00000002222	2.148253561	-0.91476061	2.037330666	-0.448999578	0.653431961	NA	protein_coding	Rmnd5a	1.037836931	1.941967087	3.5323145	2.080895725	1.169256728	2.268143678	4.057379391	2.340420908	NA
ENSMUSG00000002227	4.307957586	-1.256687817	1.522853977	-0.825218856	0.40924735	NA	protein_coding	Mov10	4.151347726	0.970983543	7.947707625	4.16179145	4.638280341	1.066933396	8.551153811	4.48539046	NA
ENSMUSG00000002228	1.62802963	-0.264102361	2.46781261	-0.107018807	0.91477406	NA	protein_coding	Ppm1j	1.037836931	1.941967087	3.5323145	0	2.35313432	4.311385516	7.855457126	0	NA
ENSMUSG00000002233	7.936538229	0.563471857	1.120300925	0.502964734	0.614989067	NA	protein_coding	Rhoc	6.227021589	12.62278606	3.5323145	9.364030763	23.60179319	47.92442999	13.90301653	36.24683281	NA
ENSMUSG00000002249	1.259912053	-0.517335605	2.757829376	-0.187587967	0.85119966	NA	protein_coding	Tead3	2.075673863	0	0.883078625	2.080895725	3.237430045	0	1.404255545	3.240070716	NA
ENSMUSG00000002250	1.865512633	-0.559353105	2.348333273	-0.238191534	0.811732543	NA	protein_coding	Ppard	2.075673863	0.970983543	4.415393125	0	2.56350643	1.179355459	5.251212894	0	NA
ENSMUSG00000002257	18.96435456	-1.004227845	0.722830563	-1.389299093	0.16474182	NA	protein_coding	Def6	15.56755397	9.709835434	25.60928012	24.9707487	36.08092837	22.03568671	58.21691605	58.84794879	NA
ENSMUSG00000002266	0.260111966	-1.461880636	4.983578111	-0.293339565	0.769262614	NA	protein_coding	Zim1	0	0	0	1.040447863	0	0	0	1.290767967	NA
ENSMUSG00000002274	0.739688122	1.138058195	3.766402882	0.302160505	0.762529711	NA	protein_coding	Metrn	2.075673863	0	0.883078625	0	7.602400135	0	3.297588642	0	NA
ENSMUSG00000002279	2.124971866	-0.139157124	2.217355406	-0.062758151	0.949959091	NA	protein_coding	Lmf1	3.113510794	0.970983543	4.415393125	0	7.073609236	2.169502306	9.659953151	0	NA
ENSMUSG00000002280	15.12629094	0.952945026	0.809215286	1.177616195	0.238949651	NA	protein_coding	Narfl	17.64322783	22.3326215	13.24617937	7.283135038	27.1619462	33.66510272	20.00174911	11.4010184	NA
ENSMUSG00000002289	1.645395709	-1.198575286	2.349532265	-0.510133572	0.609957887	NA	protein_coding	Angptl4	1.037836931	0.970983543	3.5323145	1.040447863	2.122146293	1.988818599	7.500506781	2.172746826	NA
ENSMUSG00000002297	0.242745886	1.495318361	4.995051494	0.299359949	0.764665418	NA	protein_coding	Dbf4	0	0.970983543	0	0	0	1.599247829	0	0	NA
ENSMUSG00000002307	7.18783615	-1.391115234	1.249734903	-1.113128257	0.26565335	NA	protein_coding	Daxx	3.113510794	4.854917717	17.6615725	3.121343588	5.073475256	7.780268816	27.71401792	4.906240209	NA
ENSMUSG00000002308	0.242745886	1.495318361	4.995051494	0.299359949	0.764665418	NA	protein_coding	Cd320	0	0.970983543	0	0	0	3.286860159	0	0	NA
ENSMUSG00000002319	2.595055756	-0.736924625	2.007212572	-0.367138307	0.713515855	NA	protein_coding	Ipo4	0	3.883934174	4.415393125	2.080895725	0	4.094530135	4.825580097	2.236598491	NA
ENSMUSG00000002320	3.213982337	0.716455782	1.672229728	0.428443395	0.668328336	NA	protein_coding	Tm9sf1	3.113510794	4.854917717	1.76615725	3.121343588	4.973355394	8.039498036	2.876298707	4.977412006	NA
ENSMUSG00000002324	0.762317084	1.004601827	3.464905407	0.289936292	0.771864976	NA	protein_coding	Rec8	1.037836931	0.970983543	0	1.040447863	1.999907438	1.840137186	0	1.933985245	NA
ENSMUSG00000002325	6.001263172	-0.000156288	1.253669939	-0.000124664	0.999900532	NA	protein_coding	Irf9	6.227021589	5.82590126	8.83078625	3.121343588	10.46331431	9.585381796	14.55401353	5.333016398	NA
ENSMUSG00000002329	2.18759587	-0.947081499	2.016473289	-0.469672226	0.638589214	NA	protein_coding	Mdp1	1.037836931	1.941967087	2.649235875	3.121343588	2.389716659	4.635612185	6.219327348	7.17499763	NA
ENSMUSG00000002332	0.220769656	-1.342306881	4.991527626	-0.268917049	0.787993517	NA	protein_coding	Dhrs1	0	0	0.883078625	0	0	0	2.418785982	0	NA
ENSMUSG00000002341	0.259459233	1.543782485	4.991667435	0.309271903	0.757114702	NA	protein_coding	Ncan	1.037836931	0	0	0	0.568281774	0	0	0	NA
ENSMUSG00000002342	4.401125387	0.371283506	1.438051693	0.25818509	0.796264064	NA	protein_coding	Tmem161a	3.113510794	6.796884804	3.5323145	4.16179145	4.689743104	10.25523679	5.525137464	6.402087347	NA
ENSMUSG00000002343	4.222349992	2.96636262	1.689695048	1.755560936	0.079163407	NA	protein_coding	Armc6	6.227021589	8.738851891	0.883078625	1.040447863	10.63253827	15.46888114	1.537310007	1.77353515	NA
ENSMUSG00000002345	1.390546626	0.123828391	2.835832226	0.043665627	0.965170939	NA	protein_coding	Borcs8	0	2.91295063	2.649235875	0	0	17.90989767	15.94916695	0	NA
ENSMUSG00000002346	6.118637367	0.19801606	1.213067154	0.16323586	0.870332733	NA	protein_coding	Slc25a42	7.26485852	5.82590126	6.181550375	5.202239313	9.071655667	7.123278303	7.570966257	6.605294188	NA
ENSMUSG00000002365	0.761664352	3.108943136	3.647427028	0.852366096	0.394010932	NA	protein_coding	Snx9	2.075673863	0.970983543	0	0	2.537098662	1.188850416	0	0	NA
ENSMUSG00000002372	2.6330926	0.369460015	1.854381893	0.199236207	0.842077978	NA	protein_coding	Ranbp3	2.075673863	3.883934174	3.5323145	1.040447863	3.380278041	6.557119654	5.864867028	1.691517614	NA
ENSMUSG00000002379	1.14780074	-0.456705651	3.080658051	-0.148249382	0.882145961	NA	protein_coding	Ndufa11	0	1.941967087	2.649235875	0	0	14.25847388	19.04623783	0	NA
ENSMUSG00000002384	17.54337231	0.76446579	0.736930823	1.037364386	0.299566069	NA	protein_coding	Bmp8b	21.79457556	22.3326215	11.48002212	14.56627008	28.94187532	29.03857859	14.95255743	19.66840094	NA
ENSMUSG00000002393	13.40562256	0.249020317	0.854256498	0.291505323	0.770664873	NA	protein_coding	Nr2f6	13.49188011	15.53573669	7.947707625	16.6471658	23.74815249	27.3921621	14.52727921	29.92542069	NA
ENSMUSG00000002395	5.999033007	1.196234733	1.347499304	0.887744231	0.374678348	NA	protein_coding	Use1	4.151347726	12.62278606	6.181550375	1.040447863	17.94440392	56.56438719	27.2422413	4.489760154	NA
ENSMUSG00000002396	18.82222788	0.300410543	0.727983385	0.412661263	0.679854809	NA	protein_coding	Ocel1	26.98376022	14.56475315	15.01233662	18.72806153	49.20945478	26.12202078	26.36388039	32.9451107	NA
ENSMUSG00000002409	0.220769656	-1.342306881	4.991527626	-0.268917049	0.787993517	NA	protein_coding	Dyrk1b	0	0	0.883078625	0	0	0	1.362117641	0	NA
ENSMUSG00000002413	16.34117601	-0.121968396	0.771557095	-0.158080842	0.874393096	NA	protein_coding	Braf	19.7189017	11.65180252	19.42772975	14.56627008	14.67491569	8.686065772	15.01412379	11.07092362	NA
ENSMUSG00000002416	7.860819169	-2.080206558	1.159280463	-1.794394562	0.072750214	NA	protein_coding	Ndufb2	3.113510794	2.91295063	15.01233662	10.40447863	27.37909052	26.55520795	134.5929879	91.33807598	NA
ENSMUSG00000002428	5.521604354	1.785079634	1.378439953	1.294999924	0.195320256	NA	protein_coding	Hltf	8.302695451	8.738851891	0.883078625	4.16179145	6.634231098	6.867258957	0.679494295	3.207774723	NA
ENSMUSG00000002455	8.033513627	-0.142690183	1.118764764	-0.127542615	0.898510947	NA	protein_coding	Prpf6	10.37836931	4.854917717	4.415393125	12.48537435	13.42204176	6.147927463	5.600842284	16.41849992	NA
ENSMUSG00000002458	5.958533517	0.795154698	1.242378969	0.640025884	0.522155772	NA	protein_coding	Rgs19	8.302695451	6.796884804	3.5323145	5.202239313	26.03536597	21.34969099	11.50241384	16.66009637	NA
ENSMUSG00000002459	1.220569744	-0.453172157	2.786786368	-0.162614602	0.870821889	NA	protein_coding	Rgs20	2.075673863	0	1.76615725	1.040447863	4.90900514	0	4.258623409	2.456504631	NA
ENSMUSG00000002477	3.286834002	-3.586774952	2.125472131	-1.687519163	0.091503568	NA	protein_coding	Snrpd1	1.037836931	0	7.947707625	4.16179145	8.097664429	0	59.71555745	31.32297671	NA
ENSMUSG00000002486	5.983897092	0.239810619	1.279062433	0.187489377	0.851276952	NA	protein_coding	Tchp	6.227021589	6.796884804	8.83078625	2.080895725	9.60546276	10.26609377	13.36077946	3.263853683	NA
ENSMUSG00000002489	6.272825602	-0.321257557	1.252431028	-0.256507184	0.797559234	NA	protein_coding	Tiam1	8.302695451	2.91295063	9.713864875	4.16179145	5.072579276	1.782706978	6.162924378	2.596765021	NA
ENSMUSG00000002496	40.55909262	0.440177382	0.503662041	0.873953855	0.382143384	NA	protein_coding	Tsc2	45.66482498	47.57819363	27.37543737	41.6179145	28.43162004	30.70970885	17.37746306	25.86800984	NA
ENSMUSG00000002504	0.780335897	-3.068461475	3.950645254	-0.776698812	0.437336488	NA	protein_coding	Slc9a3r2	0	0	0	3.121343588	0	0	0	5.830189096	NA
ENSMUSG00000002524	4.162989651	0.921633108	1.498215012	0.615154101	0.538452957	NA	protein_coding	Puf60	3.113510794	7.767868347	2.649235875	3.121343588	6.57202239	16.05491133	5.484837783	6.699350157	NA
ENSMUSG00000002546	10.49382911	-0.266906906	0.934191212	-0.285709074	0.775100954	NA	protein_coding	Golga2	9.340532383	9.709835434	11.48002212	11.44492649	8.158677769	8.49566003	10.41300127	10.20948326	NA
ENSMUSG00000002550	0.502205119	2.509874644	4.327787919	0.579944002	0.561952381	NA	protein_coding	Uck1	1.037836931	0.970983543	0	0	2.082413837	2.019750526	0	0	NA
ENSMUSG00000002578	3.391452267	-0.780136504	1.62505885	-0.480066617	0.631180025	NA	protein_coding	Ikzf4	2.075673863	2.91295063	4.415393125	4.16179145	2.552415858	3.522759539	5.22849442	4.936563078	NA
ENSMUSG00000002580	1.00506297	1.583873276	3.109671499	0.509337812	0.610515459	NA	protein_coding	Mien1	1.037836931	1.941967087	0	1.040447863	5.680433338	10.40762434	0	5.790487269	NA
ENSMUSG00000002602	22.68039373	-0.410135309	0.657503856	-0.623776279	0.53277452	NA	protein_coding	Axl	17.64322783	21.36163796	30.90775187	20.80895725	16.27915641	19.74356205	29.61463037	19.60860849	NA
ENSMUSG00000002603	9.023168716	-0.305378292	1.062226118	-0.287488969	0.773737947	NA	protein_coding	Tgfb1	8.302695451	7.767868347	4.415393125	15.60671794	19.57571337	18.98664745	10.61386025	36.73440126	NA
ENSMUSG00000002608	24.64145261	-0.652120228	0.631430064	-1.03276715	0.30171288	NA	protein_coding	Ccdc97	22.83241249	15.53573669	30.02467325	30.17298801	30.37639415	20.32702529	38.46605617	38.721734	NA
ENSMUSG00000002625	4.05245577	-0.387056121	1.52024986	-0.254600333	0.799031802	NA	protein_coding	Akap8l	4.151347726	2.91295063	7.064629	2.080895725	8.106806062	5.569948653	13.53145609	4.131934528	NA
ENSMUSG00000002635	0.242745886	1.495318361	4.995051494	0.299359949	0.764665418	NA	protein_coding	Pdcd2l	0	0.970983543	0	0	0	3.454166872	0	0	NA
ENSMUSG00000002658	6.262680603	-0.596967934	1.211346866	-0.492813372	0.622144461	NA	protein_coding	Gtf2f1	4.151347726	5.82590126	8.83078625	6.242687175	8.573920196	12.47387492	18.59495774	12.87137051	NA
ENSMUSG00000002661	0.701651278	-2.929320779	3.761265522	-0.778812546	0.436090146	NA	protein_coding	Alkbh7	0	0	1.76615725	1.040447863	0	0	10.73396222	6.334146757	NA
ENSMUSG00000002664	0.518918466	2.552600149	4.672415458	0.546312752	0.584850972	NA	protein_coding	Pspn	2.075673863	0	0	0	17.06516738	0	0	0	NA
ENSMUSG00000002668	3.792343805	-0.217062667	1.604216311	-0.135307605	0.892368672	NA	protein_coding	Dennd1c	4.151347726	2.91295063	7.064629	1.040447863	6.252990806	4.39510148	11.05027493	1.600521837	NA
ENSMUSG00000002679	0.485491772	2.465880337	4.803085583	0.513395045	0.607675011	NA	protein_coding	Med6	0	1.941967087	0	0	0	10.22841233	0	0	NA
ENSMUSG00000002699	15.34533334	0.142011696	0.790891165	0.179559088	0.857498726	NA	protein_coding	Lcp2	18.68106477	13.59376961	17.6615725	11.44492649	26.25805703	18.79136915	23.9059102	15.51765271	NA
ENSMUSG00000002718	18.33105297	0.586532161	0.72148497	0.812951322	0.416245968	NA	protein_coding	Cse1l	20.75673863	23.30360504	16.77849387	12.48537435	23.18875157	25.49169763	18.38508857	14.18280924	NA
ENSMUSG00000002728	13.19550235	0.731822507	0.848425683	0.862565245	0.388376546	NA	protein_coding	Naa20	14.52971704	18.44868732	11.48002212	8.323582901	50.66117391	64.43482716	41.56673026	29.63950903	NA
ENSMUSG00000002731	0.242745886	1.495318361	4.995051494	0.299359949	0.764665418	NA	protein_coding	Prkra	0	0.970983543	0	0	0	2.446980846	0	0	NA
ENSMUSG00000002733	0.684285198	-0.84647622	3.881572114	-0.218075614	0.827370198	NA	protein_coding	Plekha3	0	0.970983543	1.76615725	0	0	1.650687789	2.939949252	0	NA
ENSMUSG00000002741	3.63354542	-0.110301733	1.558424759	-0.070777708	0.943574674	NA	protein_coding	Ykt6	3.113510794	3.883934174	4.415393125	3.121343588	5.02040771	6.132222003	6.983168006	5.117674162	NA
ENSMUSG00000002748	16.91200341	-0.765947139	0.751692917	-1.018962825	0.308220615	NA	protein_coding	Baz1b	12.45404318	12.62278606	23.84312287	18.72806153	9.851945877	10.00239445	19.58663512	15.13028405	NA
ENSMUSG00000002763	1.485944592	0.022622273	2.395236564	0.009444693	0.992464338	NA	protein_coding	Pex6	1.037836931	1.941967087	0.883078625	2.080895725	1.781201731	3.45520479	1.545214798	3.565309203	NA
ENSMUSG00000002767	1.03979513	-1.596433333	3.32143994	-0.48064495	0.630768863	NA	protein_coding	Mrpl2	1.037836931	0	0	3.121343588	4.109262546	0	0	11.92143143	NA
ENSMUSG00000002768	9.038428312	0.627857996	1.013736784	0.619350117	0.535685736	NA	protein_coding	Mea1	9.340532383	12.62278606	7.947707625	6.242687175	45.18366939	59.78916453	37.70910723	30.70604497	NA
ENSMUSG00000002769	2.170882523	-0.971112456	2.156495917	-0.450319636	0.652479983	NA	protein_coding	Gnmt	0	2.91295063	2.649235875	3.121343588	0	10.79260441	10.17563927	11.79071685	NA
ENSMUSG00000002771	1.346594167	-2.162170464	3.025892563	-0.714556257	0.474883282	NA	protein_coding	Grin2d	0	0.970983543	4.415393125	0	0	0.709862715	3.174603065	0	NA
ENSMUSG00000002778	7.848063239	-1.328660259	1.125887226	-1.180100661	0.237960182	NA	protein_coding	Kdelr1	3.113510794	5.82590126	14.129258	8.323582901	9.143488248	16.82605147	39.95727337	23.57891974	NA
ENSMUSG00000002781	2.445096905	1.389121407	2.076824592	0.66886795	0.503579717	NA	protein_coding	Tmem143	5.189184657	1.941967087	2.649235875	0	9.375599808	3.435573131	4.694778047	0	NA
ENSMUSG00000002791	0.260111966	-1.461880636	4.983578111	-0.293339565	0.769262614	NA	transcribed_unprocessed_pseudogene	Pdxk-ps	0	0	0	1.040447863	0	0	0	2.88365974	NA
ENSMUSG00000002797	0.259459233	1.543782485	4.991667435	0.309271903	0.757114702	NA	protein_coding	Ggct	1.037836931	0	0	0	4.899947935	0	0	0	NA
ENSMUSG00000002804	0.259459233	1.543782485	4.991667435	0.309271903	0.757114702	NA	protein_coding	Nudt14	1.037836931	0	0	0	5.045353835	0	0	0	NA
ENSMUSG00000002808	0.220769656	-1.342306881	4.991527626	-0.268917049	0.787993517	NA	protein_coding	Epdr1	0	0	0.883078625	0	0	0	1.49658749	0	NA
ENSMUSG00000002812	10.85603107	-0.223334586	0.933438473	-0.239260103	0.8109039	NA	protein_coding	Flii	10.37836931	9.709835434	15.01233662	8.323582901	9.85565975	9.559086482	14.53484395	7.890958964	NA
ENSMUSG00000002814	1.932094054	0.806988306	2.158610965	0.373846107	0.708518814	NA	protein_coding	Top3a	1.037836931	3.883934174	1.76615725	1.040447863	1.398986741	5.148893347	2.292602702	1.35287247	NA
ENSMUSG00000002825	1.03979513	-1.596433333	3.32143994	-0.48064495	0.630768863	NA	protein_coding	Qtrt1	1.037836931	0	0	3.121343588	3.010523961	0	0	9.246921013	NA
ENSMUSG00000002831	4.550620811	1.406267711	1.491920405	0.942588965	0.345891186	NA	protein_coding	Plin4	8.302695451	4.854917717	0.883078625	4.16179145	5.657600101	3.429595913	0.613504864	2.831107415	NA
ENSMUSG00000002833	6.618190534	-0.707212653	1.178101074	-0.600298794	0.548307123	NA	protein_coding	Hdgfrp2	5.189184657	4.854917717	7.064629	9.364030763	9.108532992	8.380863012	11.94135541	15.85492535	NA
ENSMUSG00000002835	3.730248851	-0.9813498	1.590442318	-0.617029482	0.53721528	NA	protein_coding	Chaf1a	2.075673863	2.91295063	2.649235875	7.283135038	2.445219649	3.360077394	3.061074428	8.724078501	NA
ENSMUSG00000002844	3.348152541	-2.504833257	1.809343186	-1.384388146	0.166239637	NA	protein_coding	Adprh	1.037836931	0.970983543	6.181550375	5.202239313	2.570718909	2.409208827	15.9003956	13.16007612	NA
ENSMUSG00000002845	9.109702544	0.077030479	1.065210713	0.072314781	0.942351402	NA	protein_coding	Tmem39a	4.151347726	14.56475315	11.48002212	6.242687175	7.754078192	28.20279384	21.86196966	11.64060443	NA
ENSMUSG00000002846	0.518918466	2.552600149	4.672415458	0.546312752	0.584850972	NA	protein_coding	Timmdc1	2.075673863	0	0	0	5.346030885	0	0	0	NA
ENSMUSG00000002870	8.019411211	-0.923496305	1.139142649	-0.810694171	0.417541322	NA	protein_coding	Mcm2	5.189184657	5.82590126	4.415393125	16.6471658	6.142634357	6.752678222	5.126481776	20.03725782	NA
ENSMUSG00000002871	2.244304259	-1.785825892	2.094256683	-0.852725411	0.393811595	NA	protein_coding	Tpra1	1.037836931	0.970983543	1.76615725	5.202239313	2.160185851	2.024468254	3.817476835	11.05846701	NA
ENSMUSG00000002881	3.091997992	-0.572598327	1.711671026	-0.334525922	0.737982734	NA	protein_coding	Nab1	2.075673863	2.91295063	5.29847175	2.080895725	2.688028118	3.910711292	6.995694122	2.690220659	NA
ENSMUSG00000002885	27.65403059	-0.203324713	0.593998266	-0.342298495	0.732126268	NA	protein_coding	Adgre5	30.09727101	21.36163796	30.02467325	29.13254015	41.6716969	29.08748517	40.03200209	38.90849925	NA
ENSMUSG00000002897	21.06922573	-0.684393063	0.68386643	-1.000770082	0.316937977	NA	protein_coding	Il17ra	19.7189017	12.62278606	23.84312287	28.09209229	19.6258105	12.30148375	23.2756875	28.42964311	NA
ENSMUSG00000002900	0.242745886	1.495318361	4.995051494	0.299359949	0.764665418	NA	protein_coding	Lamb1	0	0.970983543	0	0	0	0.641377741	0	0	NA
ENSMUSG00000002910	1.243198706	-0.551546057	2.609224552	-0.211383132	0.832588318	NA	protein_coding	Arrdc2	1.037836931	0.970983543	0.883078625	2.080895725	1.948475261	1.889842385	1.69032668	3.900129143	NA
ENSMUSG00000002948	2.943997339	-0.386393365	1.765960885	-0.218800636	0.826805351	NA	protein_coding	Map2k7	4.151347726	0.970983543	3.5323145	3.121343588	10.3051999	2.370482402	8.443871712	7.474135116	NA
ENSMUSG00000002949	5.010178936	0.33472372	1.366519756	0.244946126	0.806498146	NA	protein_coding	Timm44	7.26485852	3.883934174	2.649235875	6.242687175	15.93641752	8.342434306	5.700050028	13.92443407	NA
ENSMUSG00000002957	2.769138341	-0.829393145	1.889673851	-0.438908092	0.660728133	NA	protein_coding	Ap2a2	1.037836931	2.91295063	0.883078625	6.242687175	0.864168221	2.429625851	0.76357832	5.308640877	NA
ENSMUSG00000002963	1.671982089	1.445073327	2.474534031	0.583977956	0.559235143	NA	protein_coding	Pnkp	1.037836931	3.883934174	1.76615725	0	2.442463318	9.475862063	4.237735005	0	NA
ENSMUSG00000002968	3.346194342	-0.708063804	1.701761694	-0.416076943	0.677353701	NA	protein_coding	Med25	4.151347726	0.970983543	6.181550375	2.080895725	7.098940883	1.632953713	10.17927422	3.432470589	NA
ENSMUSG00000002980	0.260111966	-1.461880636	4.983578111	-0.293339565	0.769262614	NA	protein_coding	Bcam	0	0	0	1.040447863	0	0	0	1.709413046	NA
ENSMUSG00000002981	3.325523578	-2.461637087	1.889104111	-1.303071161	0.192550468	NA	protein_coding	Clptm1	2.075673863	0	7.064629	4.16179145	3.224079572	0	11.39517609	6.601909287	NA
ENSMUSG00000002983	2.932546875	0.052143809	1.730606535	0.030130366	0.975963083	NA	protein_coding	Relb	2.075673863	3.883934174	2.649235875	3.121343588	3.792153899	7.356083305	4.934611466	5.692870562	NA
ENSMUSG00000002984	3.271343459	-0.237012308	1.724491316	-0.137438969	0.890683831	NA	protein_coding	Tomm40	2.075673863	3.883934174	0.883078625	6.242687175	5.798257436	10.67008295	2.375487251	16.821395	NA
ENSMUSG00000002985	11.22646147	-1.972425408	1.056103369	-1.867644273	0.061811671	NA	protein_coding	Apoe	7.26485852	1.941967087	27.37543737	8.323582901	25.56705833	6.691952699	94.49507397	29.78559998	NA
ENSMUSG00000002997	2.689800989	-0.205905471	1.797379633	-0.114558698	0.908794918	NA	protein_coding	Prkar2b	2.075673863	2.91295063	2.649235875	3.121343588	4.302006124	6.258827359	5.598066247	6.458272705	NA
ENSMUSG00000003031	24.1445514	-0.113857003	0.639678881	-0.177990873	0.858730143	NA	protein_coding	Cdkn1b	28.02159715	18.44868732	28.258516	21.84940511	40.70262427	26.35436485	39.52699793	30.61407926	NA
ENSMUSG00000003032	0.518918466	2.552600149	4.672415458	0.546312752	0.584850972	NA	protein_coding	Klf4	2.075673863	0	0	0	2.671167272	0	0	0	Klf4
ENSMUSG00000003033	6.861630173	1.196113839	1.20366906	0.993723174	0.320357657	NA	protein_coding	Ap1m1	11.41620625	7.767868347	6.181550375	2.080895725	21.90582057	14.93058009	12.31743214	4.077844319	NA
ENSMUSG00000003037	7.635208416	-0.078011791	1.135150123	-0.068723766	0.945209501	NA	protein_coding	Rab8a	5.189184657	9.709835434	11.48002212	4.16179145	19.90833419	38.6185183	44.9038957	15.93965824	NA
ENSMUSG00000003038	3.672234997	0.270051396	1.547465474	0.174512065	0.86146305	NA	protein_coding	Hmgn2	4.151347726	3.883934174	3.5323145	3.121343588	16.87358063	15.52557013	13.82586962	12.23803738	NA
ENSMUSG00000003039	4.351910045	-0.556872392	1.440792554	-0.386504213	0.699123283	NA	protein_coding	Fam32a	4.151347726	2.91295063	6.181550375	4.16179145	14.06583493	9.664222599	20.54321061	14.33834943	NA
ENSMUSG00000003062	0.441539312	-2.269171085	4.900751531	-0.463025124	0.643346359	NA	protein_coding	Stard3nl	0	0	1.76615725	0	0	0	5.26440064	0	NA
ENSMUSG00000003068	8.613874313	0.529733429	1.087624175	0.487055585	0.626218941	NA	protein_coding	Stk11	15.56755397	4.854917717	8.83078625	5.202239313	33.78844505	10.92389809	19.54126602	11.27200174	NA
ENSMUSG00000003072	6.539505915	-0.684542403	1.182599474	-0.578845517	0.562693416	NA	protein_coding	Atp5d	5.189184657	4.854917717	8.83078625	7.283135038	26.3380667	24.23394955	43.16175496	35.65785295	NA
ENSMUSG00000003099	2.103648369	-1.638313857	2.280538181	-0.718389137	0.472517383	NA	protein_coding	Ppp5c	2.075673863	0	5.29847175	1.040447863	4.013349641	0	10.04830954	2.045552568	NA
ENSMUSG00000003119	7.401178383	0.060796712	1.108691672	0.054836447	0.956268763	NA	protein_coding	Cdk12	8.302695451	6.796884804	6.181550375	8.323582901	6.359227907	5.214735636	4.916632418	6.51085757	NA
ENSMUSG00000003123	12.95233467	-0.414904718	0.85331999	-0.486224069	0.626808308	NA	protein_coding	Lipe	13.49188011	8.738851891	15.01233662	14.56627008	16.02833479	10.76262606	18.18317525	17.27536312	NA
ENSMUSG00000003131	4.39716797	-0.611828847	1.448764105	-0.422310882	0.672798116	NA	protein_coding	Pafah1b2	2.075673863	4.854917717	4.415393125	6.242687175	2.577103812	5.928055054	5.279066441	7.47646714	NA
ENSMUSG00000003134	32.16409539	0.69541381	0.662159007	1.050221778	0.293616159	NA	protein_coding	Tbc1d8	39.43780339	39.81032528	8.83078625	40.57746664	34.7371987	34.33485341	7.62914641	36.3420521	NA
ENSMUSG00000003135	4.864640929	0.346681186	1.377285238	0.251713426	0.801262579	NA	protein_coding	Cnot11	3.113510794	7.767868347	4.415393125	4.16179145	7.217608262	18.03773045	10.62912107	9.852940236	NA
ENSMUSG00000003153	9.462832491	-1.089754208	1.00509799	-1.084226831	0.278264238	NA	protein_coding	Slc2a3	7.26485852	4.854917717	13.24617937	12.48537435	7.482050898	5.18350249	13.90879889	12.83683504	NA
ENSMUSG00000003154	5.894563027	-0.67552567	1.247041128	-0.541702799	0.588023261	NA	protein_coding	Foxj2	5.189184657	3.883934174	6.181550375	8.323582901	4.527802718	3.33286551	5.193985554	7.005687149	NA
ENSMUSG00000003161	7.845328626	-0.892245334	1.103050322	-0.808889056	0.418578964	NA	protein_coding	Sri	4.151347726	6.796884804	7.947707625	12.48537435	10.16012467	16.28835516	19.07859146	31.07090729	NA
ENSMUSG00000003166	1.181227434	-0.381611831	3.046912866	-0.125245403	0.900329274	NA	protein_coding	Dgcr2	2.075673863	0	2.649235875	0	2.086517394	0	2.765467545	0	NA
ENSMUSG00000003184	5.799165061	-0.657560253	1.25338044	-0.52462942	0.599840831	NA	protein_coding	Irf3	4.151347726	4.854917717	7.947707625	6.242687175	10.23418798	12.40778021	19.97614391	15.36380353	NA
ENSMUSG00000003190	21.60117363	0.11807809	0.669552087	0.176353852	0.860015957	NA	protein_coding	Bcl2l12	20.75673863	24.27458859	24.7262015	16.6471658	76.54882036	88.0417815	87.81157042	59.22045643	NA
ENSMUSG00000003198	0.662308969	-2.85341927	4.211512459	-0.677528393	0.498070761	NA	protein_coding	Zfp959	0	0	2.649235875	0	0	0	4.929175594	0	NA
ENSMUSG00000003199	4.647406903	-1.835749726	1.488561759	-1.233237194	0.217487282	NA	protein_coding	Mpnd	3.113510794	0.970983543	6.181550375	8.323582901	7.99377317	2.497183287	16.48101306	21.82500531	NA
ENSMUSG00000003200	7.004326923	-1.089462657	1.166746569	-0.933761184	0.350427096	NA	protein_coding	Sh3gl1	3.113510794	5.82590126	9.713864875	9.364030763	5.910471322	11.46523073	18.80049548	17.74587693	NA
ENSMUSG00000003206	0.259459233	1.543782485	4.991667435	0.309271903	0.757114702	NA	protein_coding	Ebi3	1.037836931	0	0	0	3.514730944	0	0	0	NA
ENSMUSG00000003208	2.230242864	1.867938003	2.076725308	0.899463206	0.368405986	NA	protein_coding	Ccdc94	3.113510794	3.883934174	0.883078625	1.040447863	7.3224336	8.944052165	2.037037109	2.488099998	NA
ENSMUSG00000003226	13.56585009	0.206921722	0.846724059	0.24437917	0.806937173	NA	protein_coding	Ranbp2	15.56755397	13.59376961	16.77849387	8.323582901	6.275355805	5.489022172	7.023538935	3.426658996	NA
ENSMUSG00000003233	0.502205119	2.509874644	4.327787919	0.579944002	0.561952381	NA	protein_coding	Dvl3	1.037836931	0.970983543	0	0	1.734287188	1.682099589	0	0	NA
ENSMUSG00000003234	0.922420934	-3.326215344	3.380539188	-0.98393042	0.325149725	NA	protein_coding	Abcf3	0	0	2.649235875	1.040447863	0	0	4.114975584	1.618840507	NA
ENSMUSG00000003235	4.092450812	-0.784095129	1.48779875	-0.527016929	0.598181832	NA	protein_coding	Eif2b5	3.113510794	2.91295063	6.181550375	4.16179145	4.911136441	4.499063725	9.563647017	6.675047798	NA
ENSMUSG00000003269	4.097713695	-0.4467079	1.491537222	-0.299494973	0.764562407	NA	protein_coding	Cyth2	2.075673863	4.854917717	5.29847175	4.16179145	4.44470763	10.41365201	11.78201987	9.101374803	NA
ENSMUSG00000003271	13.41081982	-0.023651192	0.901790248	-0.026226932	0.979076335	NA	protein_coding	Sult2b1	6.227021589	20.39065441	17.6615725	9.364030763	21.67976964	73.59586202	62.69157182	32.54617973	NA
ENSMUSG00000003273	0.260111966	-1.461880636	4.983578111	-0.293339565	0.769262614	NA	protein_coding	Car11	0	0	0	1.040447863	0	0	0	2.581564015	NA
ENSMUSG00000003282	0.220769656	-1.342306881	4.991527626	-0.268917049	0.787993517	NA	protein_coding	Plag1	0	0	0.883078625	0	0	0	1.070296732	0	NA
ENSMUSG00000003283	4.6779507	0.19904791	1.385063039	0.143710362	0.885729189	NA	protein_coding	Hck	4.151347726	5.82590126	3.5323145	5.202239313	7.647888754	10.75109439	6.757668129	9.787806617	NA
ENSMUSG00000003299	3.797606687	0.126147776	1.593183934	0.079179669	0.936889716	NA	protein_coding	Mrpl4	3.113510794	4.854917717	6.181550375	1.040447863	12.90601837	20.86275786	26.12430915	4.305515137	NA
ENSMUSG00000003308	3.504216313	-1.281343031	1.678773167	-0.763261563	0.44530742	NA	protein_coding	Keap1	3.113510794	0.970983543	2.649235875	7.283135038	4.78725911	1.468270205	3.922582985	10.80206983	NA
ENSMUSG00000003316	20.28066139	0.268101717	0.689220642	0.388992582	0.697281634	NA	protein_coding	Glg1	23.87024942	20.39065441	15.01233662	21.84940511	23.90346117	19.9936642	14.74506288	22.24773959	NA
ENSMUSG00000003341	0.260111966	-1.461880636	4.983578111	-0.293339565	0.769262614	NA	protein_coding	Atp8b3	0	0	0	1.040447863	0	0	0	1.636546444	NA
ENSMUSG00000003344	13.06360395	-0.932859816	0.856983809	-1.088538436	0.276357478	NA	protein_coding	Btbd2	7.26485852	10.68081898	17.6615725	16.6471658	13.36797876	20.37469334	33.13396833	30.5803031	NA
ENSMUSG00000003345	10.07039127	-1.601808987	0.997730853	-1.605451993	0.10839437	NA	protein_coding	Csnk1g2	4.151347726	5.82590126	16.77849387	13.52582221	7.157381038	9.878379436	27.85691082	22.49472872	NA
ENSMUSG00000003346	0.965720661	1.666650692	3.151915212	0.528773961	0.596962263	NA	protein_coding	Abhd17a	1.037836931	1.941967087	0.883078625	0	3.034374178	5.559545313	2.532409227	0	NA
ENSMUSG00000003348	3.799564886	-1.081472362	1.700651708	-0.635916429	0.524830894	NA	protein_coding	Mob3a	0	4.854917717	6.181550375	4.16179145	0	28.36412523	37.43974427	24.78981767	NA
ENSMUSG00000003352	0.761664352	3.108943136	3.647427028	0.852366096	0.394010932	NA	protein_coding	Cacnb3	2.075673863	0.970983543	0	0	2.8893256	1.401190483	0	0	NA
ENSMUSG00000003354	0.220769656	-1.342306881	4.991527626	-0.268917049	0.787993517	NA	protein_coding	Ccdc65	0	0	0.883078625	0	0	0	4.579000797	0	NA
ENSMUSG00000003360	15.79886921	-1.344032801	0.838782679	-1.602361177	0.109075765	NA	protein_coding	Ddx23	6.227021589	11.65180252	31.7908305	13.52582221	8.607933247	15.77135585	43.10373402	19.01186124	NA
ENSMUSG00000003363	8.548557336	-1.905263737	1.232040355	-1.546429652	0.122000838	NA	protein_coding	Pld3	7.26485852	0	12.36310075	14.56627008	12.12470168	0	21.4267526	24.82760703	NA
ENSMUSG00000003378	2.74455118	0.889056767	1.820865962	0.488260413	0.625365398	NA	protein_coding	Grik5	5.189184657	1.941967087	1.76615725	2.080895725	5.303058667	2.057392309	1.840187911	2.122953683	NA
ENSMUSG00000003379	6.214117994	-1.633085609	1.27541719	-1.280432491	0.200393073	NA	protein_coding	Cd79a	4.151347726	1.941967087	11.48002212	7.283135038	16.70296808	7.684293811	44.47973777	28.26669031	NA
ENSMUSG00000003380	4.57924805	-1.066680369	1.463609131	-0.72880139	0.466123161	NA	protein_coding	Rabac1	1.037836931	4.854917717	6.181550375	6.242687175	4.920060372	22.53619443	28.7430748	30.09229604	NA
ENSMUSG00000003382	9.938873017	0.157160458	0.967986456	0.162358117	0.871023851	NA	protein_coding	Etv3	9.340532383	11.65180252	11.48002212	7.283135038	8.668471633	10.83181222	11.06365622	6.902904545	NA
ENSMUSG00000003402	8.883900951	-2.02665373	1.08479108	-1.868243357	0.061728158	NA	protein_coding	Prkcsh	3.113510794	3.883934174	15.01233662	13.52582221	5.9148592	7.649161606	29.07688158	25.65196299	NA
ENSMUSG00000003410	0.485491772	2.465880337	4.803085583	0.513395045	0.607675011	NA	protein_coding	Elavl3	0	1.941967087	0	0	0	4.229141113	0	0	NA
ENSMUSG00000003418	4.198374543	-0.15526374	1.497849981	-0.103657738	0.917440966	NA	protein_coding	St8sia6	2.075673863	5.82590126	2.649235875	6.242687175	2.192447955	6.025466721	2.744639474	6.704774732	NA
ENSMUSG00000003420	6.859060883	-1.537872778	1.217791096	-1.262837923	0.206647433	NA	protein_coding	Fcgrt	4.151347726	2.91295063	14.129258	6.242687175	9.264769138	6.512019898	32.74536915	14.22851795	NA
ENSMUSG00000003421	2.732447983	2.232184545	1.935776809	1.153120822	0.248860796	NA	protein_coding	Nosip	4.151347726	4.854917717	0.883078625	1.040447863	16.06313577	19.47471147	3.483742839	4.019059493	NA
ENSMUSG00000003423	7.183143339	-0.268788395	1.157059691	-0.232302963	0.816302711	NA	protein_coding	Pih1d1	7.26485852	5.82590126	11.48002212	4.16179145	26.49739873	20.89761663	40.32122883	14.64227142	NA
ENSMUSG00000003435	20.90179416	-1.310728254	0.69277743	-1.891990411	0.058492258	NA	protein_coding	Supt5	11.41620625	12.62278606	33.55698775	26.01119656	12.36109739	13.69075974	37.73142759	28.7632633	NA
ENSMUSG00000003437	7.608811343	0.410355803	1.187088644	0.345682528	0.729581317	NA	protein_coding	Paf1	14.52971704	2.91295063	8.83078625	4.16179145	26.04913937	5.413987981	16.14139606	7.448681955	NA
ENSMUSG00000003438	0.502857851	-0.02547562	4.438514814	-0.005739672	0.995420429	NA	protein_coding	Timm50	0	0.970983543	0	1.040447863	0	4.694111538	0	4.933513935	NA
ENSMUSG00000003444	3.023334691	-0.967576795	1.78906989	-0.540826717	0.588627026	NA	protein_coding	Med29	3.113510794	0.970983543	1.76615725	6.242687175	18.10479868	5.528567163	10.07319391	36.91112984	NA
ENSMUSG00000003452	0.745603737	0.95759358	3.755317249	0.25499672	0.798725633	NA	protein_coding	Bicd1	0	1.941967087	0	1.040447863	0	1.942434426	0	1.061036496	NA
ENSMUSG00000003458	4.545357928	1.05721855	1.474746315	0.716881635	0.473447134	NA	protein_coding	Ncstn	9.340532383	2.91295063	1.76615725	4.16179145	16.47652529	5.326906373	3.176353765	7.328873192	NA
ENSMUSG00000003464	6.891562878	-0.846600872	1.213104138	-0.697879799	0.485252369	NA	protein_coding	Pex19	2.075673863	7.767868347	11.48002212	6.242687175	3.645021058	13.41529846	19.41326595	10.57461482	NA
ENSMUSG00000003500	7.153169614	-0.221332432	1.148895013	-0.192648092	0.847234578	NA	protein_coding	Impdh1	9.340532383	3.883934174	7.064629	8.323582901	15.10478865	6.149959836	11.2053876	13.68660627	NA
ENSMUSG00000003518	0.502205119	2.509874644	4.327787919	0.579944002	0.561952381	NA	protein_coding	Dusp3	1.037836931	0.970983543	0	0	2.089806701	1.958510801	0	0	NA
ENSMUSG00000003526	0.259459233	1.543782485	4.991667435	0.309271903	0.757114702	NA	protein_coding	Prodh	1.037836931	0	0	0	1.762680385	0	0	0	NA
ENSMUSG00000003527	1.910117825	0.091930452	2.14789924	0.04280017	0.965860829	NA	protein_coding	Dgcr14	1.037836931	2.91295063	2.649235875	1.040447863	2.335864739	6.447765763	5.741880524	2.258868513	NA
ENSMUSG00000003528	1.226485359	-0.588660522	2.785185407	-0.21135416	0.832610924	NA	protein_coding	Slc25a1	0	1.941967087	0.883078625	2.080895725	0	5.75073524	2.619497488	6.399070165	NA
ENSMUSG00000003531	0.762969817	-1.046239201	3.729478194	-0.280532328	0.779069126	NA	protein_coding	Dgcr6	0	0.970983543	0	2.080895725	0	3.96072907	0	8.654043682	NA
ENSMUSG00000003534	1.004410237	3.509897798	3.253598577	1.078774076	0.280688454	NA	protein_coding	Ddr1	2.075673863	1.941967087	0	0	2.094732573	2.03169857	0	0	NA
ENSMUSG00000003545	10.09885319	-0.472709242	0.995868093	-0.474670536	0.635021822	NA	protein_coding	Fosb	5.189184657	11.65180252	7.947707625	15.60671794	5.499079705	12.14343528	8.11050181	15.95344686	NA
ENSMUSG00000003546	1.143190591	-3.63706194	3.124007209	-1.164229689	0.244330942	NA	protein_coding	Klc4	0	0	3.5323145	1.040447863	0	0	7.952210557	2.428268855	NA
ENSMUSG00000003549	14.98770051	-0.57950948	0.803071387	-0.721616396	0.470530356	NA	protein_coding	Ercc1	10.37836931	13.59376961	14.129258	21.84940511	37.41206164	49.08621333	52.89162637	80.43864403	NA
ENSMUSG00000003555	2.713082684	-0.821954177	1.984050587	-0.414280857	0.678668432	NA	protein_coding	Cyp17a1	0	3.883934174	1.76615725	5.202239313	0	8.576654286	3.835596999	11.0624501	NA
ENSMUSG00000003559	0.761664352	3.108943136	3.647427028	0.852366096	0.394010932	NA	protein_coding	As3mt	2.075673863	0.970983543	0	0	4.677020225	2.151689292	0	0	NA
ENSMUSG00000003575	1.447255015	-0.970452931	2.581492754	-0.37592704	0.706971137	NA	protein_coding	Crtc1	0	1.941967087	1.76615725	2.080895725	0	1.310955348	1.236013868	1.432194004	NA
ENSMUSG00000003581	0.905054855	-1.428454698	3.481969908	-0.410243263	0.681627507	NA	protein_coding	Rnf215	0	0.970983543	2.649235875	0	0	2.174941039	5.835980123	0	NA
ENSMUSG00000003585	0.480881622	-2.379757052	4.40268867	-0.540523582	0.588836002	NA	protein_coding	Sec14l2	0	0	0.883078625	1.040447863	0	0	1.33171255	1.571695998	NA
ENSMUSG00000003604	3.418038646	0.460524196	1.631496568	0.282271017	0.777735707	NA	protein_coding	Aven	2.075673863	5.82590126	2.649235875	3.121343588	7.83697026	21.53820955	9.810795224	11.9832081	NA
ENSMUSG00000003617	25.97815825	0.572881593	0.622632127	0.920096423	0.357522373	NA	protein_coding	Cp	28.02159715	33.98442402	15.89541525	26.01119656	26.83738018	32.60350211	15.80899117	25.44193672	NA
ENSMUSG00000003623	0.740993588	-2.999317879	3.686217821	-0.813657257	0.415841327	NA	protein_coding	Crot	0	0	0.883078625	2.080895725	0	0	1.214718065	2.802746585	NA
ENSMUSG00000003644	6.1192901	-0.044018787	1.210162166	-0.036374288	0.970983916	NA	protein_coding	Rps6ka1	6.227021589	5.82590126	6.181550375	6.242687175	8.020344118	7.379608266	7.666991785	7.755972547	NA
ENSMUSG00000003660	19.10620865	-0.16533525	0.711256679	-0.232455111	0.816184549	NA	protein_coding	Snrnp200	17.64322783	18.44868732	24.7262015	15.60671794	15.42058453	15.78867411	21.19701463	13.87001138	NA
ENSMUSG00000003662	9.42195377	0.960539845	1.065089039	0.90183995	0.367141894	NA	protein_coding	Ciao1	11.41620625	13.59376961	10.5969435	2.080895725	32.74395485	39.05587183	31.56276132	6.095400528	NA
ENSMUSG00000003665	0.260111966	-1.461880636	4.983578111	-0.293339565	0.769262614	NA	protein_coding	Has1	0	0	0	1.040447863	0	0	0	1.898527151	NA
ENSMUSG00000003680	14.32159882	0.362065138	0.846559665	0.427690042	0.668876801	NA	protein_coding	Taf6l	19.7189017	12.62278606	17.6615725	7.283135038	39.5495808	24.89842881	34.11170956	14.09060318	NA
ENSMUSG00000003721	1.225179894	2.093443683	2.8758747	0.727932856	0.466654689	NA	protein_coding	Insig2	2.075673863	1.941967087	0.883078625	0	4.361352845	3.995410148	1.819935436	0	NA
ENSMUSG00000003731	4.596614129	-1.440813266	1.470254049	-0.979975717	0.327098105	NA	protein_coding	Kpna6	1.037836931	3.883934174	6.181550375	7.283135038	1.813039504	6.796528024	11.21400136	12.99388779	NA
ENSMUSG00000003746	4.734659089	-0.128686403	1.399202469	-0.091971252	0.92672088	NA	protein_coding	Man1a	4.151347726	4.854917717	2.649235875	7.283135038	6.267308037	7.598392834	4.077726131	10.97673515	NA
ENSMUSG00000003752	13.2004261	-1.072564224	0.857895617	-1.250226953	0.211216654	NA	protein_coding	Itpkc	8.302695451	8.738851891	21.193887	14.56627008	10.25720921	10.61749445	25.21364735	17.35843323	NA
ENSMUSG00000003778	8.994475853	0.321955928	1.014066691	0.317489895	0.750871906	NA	protein_coding	Brd8	9.340532383	10.68081898	9.713864875	6.242687175	8.347473974	9.346422175	8.514712777	5.672799813	NA
ENSMUSG00000003779	22.18789632	0.638989777	0.661842461	0.965471113	0.334308898	NA	protein_coding	Kif20a	23.87024942	30.10048985	15.01233662	19.76850939	26.73743043	33.77329077	17.46208309	22.61409632	NA
ENSMUSG00000003808	2.33033364	-1.914558418	2.161701721	-0.885671876	0.375794368	NA	protein_coding	Farsa	0	1.941967087	5.29847175	2.080895725	0	4.25058609	11.40552111	4.386036322	NA
ENSMUSG00000003809	1.208466547	2.073190893	2.912942537	0.711717058	0.476640002	NA	protein_coding	Gcdh	1.037836931	2.91295063	0.883078625	0	1.917274308	5.292316559	1.570975668	0	NA
ENSMUSG00000003810	0.965720661	1.666650692	3.151915212	0.528773961	0.596962263	NA	protein_coding	Mast2	1.037836931	1.941967087	0.883078625	0	0.741963799	1.359417501	0.619223557	0	NA
ENSMUSG00000003812	5.582352822	0.208641817	1.272184464	0.164002802	0.869728938	NA	protein_coding	Dnase2a	5.189184657	6.796884804	6.181550375	4.16179145	11.00720219	14.44191663	13.61633656	9.015726659	NA
ENSMUSG00000003814	17.39084417	0.037231977	0.734651226	0.0506798	0.959580673	NA	protein_coding	Calr	19.7189017	15.53573669	17.6615725	16.6471658	41.64881545	32.27077104	35.92230986	33.91659898	NA
ENSMUSG00000003824	1.768032787	0.370846682	2.392712825	0.154990051	0.876829161	NA	protein_coding	Syce2	1.037836931	2.91295063	0	3.121343588	5.337069431	14.66777543	0	16.32141287	NA
ENSMUSG00000003847	12.78282122	-1.27779874	0.883757703	-1.445869989	0.148213671	NA	protein_coding	Nfat5	5.189184657	9.709835434	18.54465112	17.68761366	1.529107256	2.866076634	5.674695168	5.322928975	NA
ENSMUSG00000003848	4.448613477	-1.331134901	1.470617728	-0.90515358	0.36538403	NA	protein_coding	Nob1	3.113510794	1.941967087	4.415393125	8.323582901	7.203720924	4.657965951	10.41553013	19.2255914	NA
ENSMUSG00000003849	0.260111966	-1.461880636	4.983578111	-0.293339565	0.769262614	NA	protein_coding	Nqo1	0	0	0	1.040447863	0	0	0	2.563337311	NA
ENSMUSG00000003863	0.762969817	-1.046239201	3.729478194	-0.280532328	0.779069126	NA	protein_coding	Ppfia3	0	0.970983543	0	2.080895725	0	0.885676196	0	1.971053748	NA
ENSMUSG00000003865	4.981445053	-1.246817708	1.424500919	-0.875266342	0.381429003	NA	protein_coding	Gys1	1.037836931	4.854917717	8.83078625	5.202239313	1.260507814	5.90657061	11.13783654	6.452817041	NA
ENSMUSG00000003868	5.136856092	-0.354829203	1.320681385	-0.268671314	0.788182629	NA	protein_coding	Ruvbl2	4.151347726	4.854917717	5.29847175	6.242687175	8.500736561	10.30616899	11.06174307	12.76150552	NA
ENSMUSG00000003873	2.845294689	-3.35662214	2.202722007	-1.523851911	0.127545709	NA	protein_coding	Bax	1.037836931	0	6.181550375	4.16179145	5.260903005	0	30.17474028	20.34995939	NA
ENSMUSG00000003882	24.59925201	-0.647769891	0.665719667	-0.973037036	0.330534895	NA	protein_coding	Il7r	20.75673863	17.47770378	18.54465112	41.6179145	25.38443648	20.92908207	22.24444523	51.75247996	NA
ENSMUSG00000003923	1.203856397	-0.489466816	2.635175393	-0.185743544	0.852645879	NA	protein_coding	Tfam	1.037836931	0.970983543	1.76615725	1.040447863	3.119138943	2.923173377	5.51213714	3.193511806	NA
ENSMUSG00000003929	1.143190591	-3.63706194	3.124007209	-1.164229689	0.244330942	NA	protein_coding	Zfp81	0	0	3.5323145	1.040447863	0	0	19.22599664	5.545072346	NA
ENSMUSG00000003948	2.545840414	-3.182732426	2.301868699	-1.382673315	0.166765058	NA	protein_coding	Mmd	1.037836931	0	7.064629	2.080895725	1.929817224	0	12.65002463	3.732410776	NA
ENSMUSG00000003955	0.260111966	-1.461880636	4.983578111	-0.293339565	0.769262614	NA	protein_coding	Fam162a	0	0	0	1.040447863	0	0	0	6.379350381	NA
ENSMUSG00000003970	13.96954186	0.468797573	0.863117689	0.543144439	0.587030358	NA	protein_coding	Rpl8	22.83241249	9.709835434	15.01233662	8.323582901	103.1743483	43.9510148	70.44550266	38.41252408	NA
ENSMUSG00000003992	0.943744431	0.158748904	3.113803536	0.050982312	0.959339615	NA	protein_coding	Ssbp2	1.037836931	0.970983543	1.76615725	0	1.047917314	1.016383732	1.818162776	0	NA
ENSMUSG00000004032	0.259459233	1.543782485	4.991667435	0.309271903	0.757114702	NA	protein_coding	Gstm5	1.037836931	0	0	0	4.657694767	0	0	0	NA
ENSMUSG00000004040	10.53517064	0.559908318	0.939143603	0.596190313	0.551048096	NA	protein_coding	Stat3	13.49188011	11.65180252	9.713864875	7.283135038	17.46022559	15.10454328	13.05432681	9.625833458	NA
ENSMUSG00000004043	17.84114036	0.82300762	0.753308552	1.09252393	0.274602878	NA	protein_coding	Stat5a	30.09727101	15.53573669	13.24617937	12.48537435	30.74137106	16.45037895	13.79406425	12.73094311	NA
ENSMUSG00000004044	0.662308969	-2.85341927	4.211512459	-0.677528393	0.498070761	NA	protein_coding	Ptrf	0	0	2.649235875	0	0	0	4.593504419	0	NA
ENSMUSG00000004054	7.465231534	-0.17669586	1.117966826	-0.158051076	0.874416552	NA	protein_coding	Map3k11	7.26485852	6.796884804	10.5969435	5.202239313	7.990603951	7.320146122	11.43214081	5.818154015	NA
ENSMUSG00000004056	9.013882792	-1.610378653	1.088863628	-1.478953481	0.139152748	NA	protein_coding	Akt2	2.075673863	6.796884804	16.77849387	10.40447863	2.708139021	8.882983448	22.73263913	13.86355993	NA
ENSMUSG00000004069	18.30926605	0.971004742	0.737660275	1.316330533	0.188063127	NA	protein_coding	Dnaja3	30.09727101	18.44868732	13.24617937	11.44492649	46.69606809	29.6733518	20.95315014	17.72674906	NA
ENSMUSG00000004070	29.51685025	-0.951250148	0.579358874	-1.641901404	0.100610439	NA	protein_coding	Hmox2	21.79457556	18.44868732	36.20622362	41.6179145	69.18706504	57.59695453	110.6814082	127.4409104	NA
ENSMUSG00000004085	2.963321617	-3.413069746	2.186780658	-1.560773704	0.118577154	NA	protein_coding	Zak	1.037836931	0	3.5323145	7.283135038	1.596508291	0	5.64269358	11.44202845	NA
ENSMUSG00000004096	5.354090118	1.486711172	1.373664165	1.082295957	0.279121042	NA	protein_coding	Cwc15	4.151347726	11.65180252	3.5323145	2.080895725	18.87989418	54.93529985	16.37854453	9.447646959	NA
ENSMUSG00000004099	11.3036753	0.351833841	0.933709804	0.376812838	0.706312699	NA	protein_coding	Dnmt1	17.64322783	7.767868347	11.48002212	8.323582901	13.18684271	5.709817115	8.262671047	6.001021083	NA
ENSMUSG00000004100	3.45146534	0.479839288	1.597894645	0.300294697	0.763952378	NA	protein_coding	Ppan	4.151347726	3.883934174	2.649235875	3.121343588	10.2498671	9.389844039	6.415702997	7.83633766	NA
ENSMUSG00000004105	19.35916516	0.217099802	0.728601741	0.297967723	0.765727798	NA	protein_coding	Angptl2	28.02159715	13.59376961	15.01233662	20.80895725	31.13260601	15.12862997	17.32032075	23.61106148	NA
ENSMUSG00000004110	0.960457778	0.200659463	3.325300802	0.060343252	0.951882255	NA	protein_coding	Cacna1e	2.075673863	0	1.76615725	0	0.625230742	0	0.542395495	0	NA
ENSMUSG00000004127	1.905507675	-1.488277651	2.200355671	-0.676380492	0.4987991	NA	protein_coding	Trmt10a	1.037836931	0.970983543	3.5323145	2.080895725	1.047377342	0.963703599	3.432798974	2.025706077	NA
ENSMUSG00000004187	1.247156123	3.823302283	2.9964531	1.275942641	0.201975796	NA	protein_coding	Kifc2	2.075673863	2.91295063	0	0	2.56976263	3.531217052	0	0	NA
ENSMUSG00000004207	29.99036251	-0.677827557	0.573044816	-1.182852611	0.236867566	NA	protein_coding	Psap	23.87024942	22.3326215	41.50469537	32.25388374	34.8851066	32.69338645	62.98909575	48.14018083	NA
ENSMUSG00000004221	33.44715789	0.292255851	0.557381033	0.524337632	0.600043727	NA	protein_coding	Ikbkg	26.98376022	46.60721008	30.02467325	30.17298801	45.91094834	82.20814375	52.08319081	51.25013452	NA
ENSMUSG00000004233	0.502205119	2.509874644	4.327787919	0.579944002	0.561952381	NA	protein_coding	Wars2	1.037836931	0.970983543	0	0	1.660224667	1.527591272	0	0	NA
ENSMUSG00000004263	0.762317084	1.004601827	3.464905407	0.289936292	0.771864976	NA	protein_coding	Atn1	1.037836931	0.970983543	0	1.040447863	0.922232025	0.844851431	0	0.940099545	NA
ENSMUSG00000004264	8.483703167	-0.674778429	1.044892271	-0.645787559	0.518416946	NA	protein_coding	Phb2	7.26485852	5.82590126	11.48002212	9.364030763	35.44024833	28.4688432	58.15638008	46.65251174	NA
ENSMUSG00000004266	15.79474647	-0.235765153	0.769430438	-0.306415162	0.759288565	NA	protein_coding	Ptpn6	13.49188011	15.53573669	18.54465112	15.60671794	24.60216139	29.36842	34.47664172	28.41026378	NA
ENSMUSG00000004267	1.20450913	-1.947515681	2.898419148	-0.671923411	0.501632456	NA	protein_coding	Eno2	0	0.970983543	1.76615725	2.080895725	0	1.628056251	2.899641464	3.422176119	NA
ENSMUSG00000004268	39.63161515	0.295021223	0.498467123	0.591856934	0.553946395	NA	protein_coding	Emg1	45.66482498	41.75229237	38.8554595	32.25388374	181.7969815	162.7580927	151.723	130.5657684	NA
ENSMUSG00000004270	5.880501631	0.567770505	1.240626971	0.457648043	0.647205322	NA	protein_coding	Lpcat3	7.26485852	6.796884804	5.29847175	4.16179145	14.68265563	13.76019113	11.12021338	8.590142516	NA
ENSMUSG00000004285	1.220569744	-0.453172157	2.786786368	-0.162614602	0.870821889	NA	protein_coding	Atp6v1f	2.075673863	0	1.76615725	1.040447863	12.85050862	0	11.14797708	6.430495188	NA
ENSMUSG00000004317	0.463515542	0.085921865	4.576464125	0.018774727	0.985020815	NA	protein_coding	Clcn5	0	0.970983543	0.883078625	0	0	1.2582395	1.120490592	0	NA
ENSMUSG00000004319	3.849704927	-1.040381558	1.548749831	-0.67175572	0.501739223	NA	protein_coding	Clcn3	3.113510794	1.941967087	6.181550375	4.16179145	3.08742671	1.885582516	6.012266122	4.196324234	NA
ENSMUSG00000004328	0.700998545	-0.805726255	3.846518913	-0.209468944	0.834082177	NA	protein_coding	Hif3a	1.037836931	0	1.76615725	0	1.854898392	0	3.277973346	0	NA
ENSMUSG00000004356	6.471264401	1.462062584	1.251240778	1.168490198	0.242609091	NA	protein_coding	Utp20	7.26485852	11.65180252	1.76615725	5.202239313	3.19605773	5.314085166	0.792177168	2.284760468	NA
ENSMUSG00000004359	2.787850906	3.36909819	2.208040687	1.52583157	0.127051816	NA	protein_coding	Spic	6.227021589	3.883934174	0	1.040447863	14.02312006	8.601886338	0	2.260146876	NA
ENSMUSG00000004364	3.245409813	-2.441622333	1.858553354	-1.313721948	0.188939792	NA	protein_coding	Cul3	1.037836931	0.970983543	2.649235875	8.323582901	1.4546955	1.332638145	3.64215231	11.86303266	NA
ENSMUSG00000004371	0.519571198	0.020044196	4.38467679	0.004571419	0.996352548	NA	protein_coding	Il11	1.037836931	0	0	1.040447863	3.422463126	0	0	3.504068462	NA
ENSMUSG00000004383	0.220769656	-1.342306881	4.991527626	-0.268917049	0.787993517	NA	protein_coding	Large	0	0	0.883078625	0	0	0	0.782934503	0	NA
ENSMUSG00000004393	1.763422638	-1.315831857	2.306361441	-0.57052283	0.568323142	NA	protein_coding	Ddx56	1.037836931	0.970983543	0.883078625	4.16179145	2.169017258	1.995737022	1.777248734	8.390083047	NA
ENSMUSG00000004394	4.436510279	-0.629240536	1.455172342	-0.432416503	0.665438726	NA	protein_coding	Tmed4	2.075673863	4.854917717	3.5323145	7.283135038	4.953060777	11.34367592	8.267389634	17.67157852	NA
ENSMUSG00000004415	0.684285198	-0.84647622	3.881572114	-0.218075614	0.827370198	NA	protein_coding	Col26a1	0	0.970983543	1.76615725	0	0	1.337776761	2.522604039	0	NA
ENSMUSG00000004446	21.26812734	1.185224614	0.682024692	1.737803085	0.082245517	NA	protein_coding	Bid	26.98376022	32.04245693	11.48002212	14.56627008	54.68590256	67.32039649	23.72035251	29.47027362	NA
ENSMUSG00000004451	1.702104099	-2.505595055	2.571160961	-0.974499494	0.32980859	NA	protein_coding	Ralb	1.037836931	0	2.649235875	3.121343588	1.944354453	0	4.779493769	5.640790297	NA
ENSMUSG00000004455	2.484439214	1.331191102	1.942292858	0.68537095	0.49310987	NA	protein_coding	Ppp1cc	5.189184657	1.941967087	1.76615725	1.040447863	11.49267073	4.211347709	3.836592813	2.343066439	NA
ENSMUSG00000004460	1.468578512	1.045852545	2.448887895	0.427072447	0.669326561	NA	protein_coding	Dnajb11	1.037836931	2.91295063	0.883078625	1.040447863	2.152003329	6.05039944	1.901508348	2.203315775	NA
ENSMUSG00000004462	0.520223931	-2.483189205	4.66840037	-0.531914362	0.59478531	NA	protein_coding	Tbccd1	0	0	0	2.080895725	0	0	0	2.976414346	NA
ENSMUSG00000004473	0.518918466	2.552600149	4.672415458	0.546312752	0.584850972	NA	protein_coding	Clec11a	2.075673863	0	0	0	5.980896247	0	0	0	NA
ENSMUSG00000004500	0.242745886	1.495318361	4.995051494	0.299359949	0.764665418	NA	protein_coding	Zfp324	0	0.970983543	0	0	0	0.866695947	0	0	NA
ENSMUSG00000004508	3.754877033	1.483411144	1.612612489	0.919880724	0.357635093	NA	protein_coding	Gab2	5.189184657	5.82590126	0.883078625	3.121343588	9.455307067	10.63351228	1.670940289	5.808455852	NA
ENSMUSG00000004530	8.861842061	-0.76915185	1.031407799	-0.745730108	0.455830468	NA	protein_coding	Coro1c	7.26485852	5.82590126	8.83078625	13.52582221	8.089818305	6.72547042	10.02574092	15.03620285	NA
ENSMUSG00000004535	8.60042463	-0.343707547	1.038110187	-0.331089658	0.740576763	NA	protein_coding	Tax1bp1	9.340532383	5.82590126	8.83078625	10.40447863	11.33870645	6.955247022	10.32300668	12.18328106	NA
ENSMUSG00000004552	2.045510833	-0.781413459	2.287094193	-0.341662124	0.732605179	NA	protein_coding	Ctse	1.037836931	1.941967087	0	5.202239313	2.200167842	4.031122102	0	11.21397182	NA
ENSMUSG00000004558	1.203856397	-0.489466816	2.635175393	-0.185743544	0.852645879	NA	protein_coding	Ndrg2	1.037836931	0.970983543	1.76615725	1.040447863	1.942320954	1.820291114	3.432466351	1.988633725	NA
ENSMUSG00000004561	1.230442776	3.805996253	3.047214347	1.249008379	0.211662009	NA	protein_coding	Mettl17	1.037836931	3.883934174	0	0	2.445462045	9.487496025	0	0	NA
ENSMUSG00000004562	11.17558604	-0.70001396	0.956891034	-0.731550338	0.464443069	NA	protein_coding	Arhgef40	9.340532383	7.767868347	20.31080837	7.283135038	6.953840922	5.687383783	14.56113686	5.230263183	NA
ENSMUSG00000004565	1.982234095	0.853465932	2.143648364	0.398137095	0.690529132	NA	protein_coding	Pnpla6	4.151347726	0.970983543	1.76615725	1.040447863	3.625943388	0.830426448	1.513058699	0.924048298	NA
ENSMUSG00000004567	3.510131928	-1.333374441	1.70689854	-0.781167955	0.434703719	NA	protein_coding	Mcoln1	1.037836931	2.91295063	1.76615725	8.323582901	2.007015974	5.642764656	3.546795283	16.43897069	NA
ENSMUSG00000004568	9.866905031	-0.536848567	0.976675732	-0.549669198	0.582546287	NA	protein_coding	Arhgef18	8.302695451	7.767868347	8.83078625	14.56627008	5.990462663	5.810199633	6.496001685	10.49186057	NA
ENSMUSG00000004591	2.629135183	-1.337051251	1.879109772	-0.711534403	0.47675314	NA	protein_coding	Pkn2	1.037836931	1.941967087	4.415393125	3.121343588	1.205255759	2.21793859	4.937810577	3.496582108	NA
ENSMUSG00000004609	1.143190591	-3.63706194	3.124007209	-1.164229689	0.244330942	NA	protein_coding	Cd33	0	0	3.5323145	1.040447863	0	0	6.928216147	2.11558426	NA
ENSMUSG00000004626	2.905307763	-0.895024514	1.782186967	-0.502205734	0.61552281	NA	protein_coding	Stxbp2	3.113510794	0.970983543	4.415393125	3.121343588	6.339376438	1.980364535	9.335779562	6.490532762	NA
ENSMUSG00000004630	6.203237601	0.140865275	1.230710484	0.114458499	0.908874343	NA	protein_coding	Pcp2	5.189184657	7.767868347	3.5323145	8.323582901	39.91640953	61.94441292	27.70238795	63.91834896	NA
ENSMUSG00000004633	0.961110511	-1.465750497	3.161961056	-0.463557416	0.64296487	NA	protein_coding	Chn2	1.037836931	0	1.76615725	1.040447863	3.09580874	0	5.07328574	2.993762766	NA
ENSMUSG00000004637	3.278688221	-0.301841421	1.749918457	-0.172488849	0.863053227	NA	protein_coding	Wwox	1.037836931	4.854917717	6.181550375	1.040447863	3.474345455	15.91413901	20.29718413	3.541658167	NA
ENSMUSG00000004642	2.22693818	-0.978974656	2.018734226	-0.484944795	0.627715506	NA	protein_coding	Slbp	1.037836931	1.941967087	1.76615725	4.16179145	2.499624231	4.685161603	4.417331775	10.23690145	NA
ENSMUSG00000004661	2.164966908	-0.892671345	2.03235504	-0.43923002	0.660494875	NA	protein_coding	Arid3b	2.075673863	0.970983543	3.5323145	2.080895725	3.997649444	1.938676747	6.936021869	4.000910202	NA
ENSMUSG00000004665	32.66359782	0.329099755	0.564165392	0.58333914	0.559665019	NA	protein_coding	Cnn2	45.66482498	27.18753922	31.7908305	26.01119656	136.5226069	79.9374396	91.52497159	75.01276353	NA
ENSMUSG00000004667	4.055636773	0.320896781	1.691221287	0.189742633	0.849510811	NA	protein_coding	Polr2e	3.113510794	5.82590126	0	7.283135038	7.02278358	12.86706294	0	16.70397048	NA
ENSMUSG00000004677	15.96234336	-0.813782463	0.778641712	-1.045130835	0.295962504	NA	protein_coding	Myo9b	13.49188011	9.709835434	22.96004425	17.68761366	7.500323224	5.407001386	13.2545587	10.04198004	NA
ENSMUSG00000004698	0.220769656	-1.342306881	4.991527626	-0.268917049	0.787993517	NA	protein_coding	Hdac9	0	0	0.883078625	0	0	0	0.871374911	0	NA
ENSMUSG00000004707	15.86524428	-0.64334709	0.822676792	-0.782016822	0.434204688	NA	protein_coding	Ly9	6.227021589	18.44868732	15.89541525	22.88985298	11.44519776	33.34770554	28.1338885	40.58242479	NA
ENSMUSG00000004709	0.463515542	0.085921865	4.576464125	0.018774727	0.985020815	NA	protein_coding	Cd244	0	0.970983543	0.883078625	0	0	0.987715875	0.899822073	0	NA
ENSMUSG00000004730	9.832296553	0.057534615	1.021730016	0.056310976	0.955094075	NA	protein_coding	Adgre1	11.41620625	8.738851891	15.01233662	4.16179145	15.06143008	11.54877414	20.56732183	5.607474681	NA
ENSMUSG00000004748	0.259459233	1.543782485	4.991667435	0.309271903	0.757114702	NA	protein_coding	Mtfp1	1.037836931	0	0	0	2.863880425	0	0	0	NA
ENSMUSG00000004768	0.260111966	-1.461880636	4.983578111	-0.293339565	0.769262614	NA	protein_coding	Rab23	0	0	0	1.040447863	0	0	0	1.417455024	NA
ENSMUSG00000004771	2.430341756	-0.538403154	1.913067322	-0.281434505	0.778377156	NA	protein_coding	Rab11a	1.037836931	2.91295063	2.649235875	3.121343588	4.767030325	13.10114683	11.93531602	14.57816337	NA
ENSMUSG00000004788	3.204762038	-1.10072044	1.714506276	-0.642004323	0.520870376	NA	protein_coding	Eif2b2	3.113510794	0.970983543	3.5323145	5.202239313	8.27946319	2.586430295	9.754302365	14.12813169	NA
ENSMUSG00000004789	5.165019903	-0.6021752	1.403454759	-0.429066342	0.667874946	NA	protein_coding	Dlst	7.26485852	0.970983543	6.181550375	6.242687175	10.05248872	1.392856076	8.720659796	8.623447044	NA
ENSMUSG00000004798	2.148253561	-0.91476061	2.037330666	-0.448999578	0.653431961	NA	protein_coding	Ulk2	1.037836931	1.941967087	3.5323145	2.080895725	1.049506699	1.931325687	3.439777981	2.029824412	NA
ENSMUSG00000004814	1.690000901	-0.388035849	2.401598257	-0.161574005	0.871641329	NA	protein_coding	Ccl24	0	2.91295063	1.76615725	2.080895725	0	20.00390162	12.14921057	14.83942078	NA
ENSMUSG00000004815	27.26730863	0.96896695	0.611935677	1.583445757	0.113319901	NA	protein_coding	Dgkq	33.21078181	38.83934174	14.129258	22.88985298	27.87751783	32.6575777	12.31627576	19.62278339	NA
ENSMUSG00000004837	1.209119279	0.610086384	2.822679151	0.216137347	0.828880689	NA	protein_coding	Grap	0	2.91295063	0.883078625	1.040447863	0	7.226526352	2.154534225	2.485602878	NA
ENSMUSG00000004842	1.005715703	-0.068238834	3.267709648	-0.020882772	0.98333917	NA	protein_coding	Pou1f1	0	1.941967087	0	2.080895725	0	4.094701821	0	4.303533977	NA
ENSMUSG00000004843	0.740993588	-2.999317879	3.686217821	-0.813657257	0.415841327	NA	protein_coding	Chmp2b	0	0	0.883078625	2.080895725	0	0	1.809732915	4.420927279	NA
ENSMUSG00000004846	9.428753064	-0.923722139	0.997327305	-0.926197583	0.354343309	NA	protein_coding	Plod3	6.227021589	6.796884804	13.24617937	11.44492649	7.484759383	8.183601752	16.53381788	14.04924814	NA
ENSMUSG00000004849	0.463515542	0.085921865	4.576464125	0.018774727	0.985020815	NA	protein_coding	Ap1s1	0	0.970983543	0.883078625	0	0	2.958486031	2.646150763	0	NA
ENSMUSG00000004865	17.53364757	0.209639755	0.786843276	0.266431399	0.789906986	NA	protein_coding	Srpk1	24.90808635	12.62278606	9.713864875	22.88985298	68.05040344	33.91588243	25.55626329	60.32334341	NA
ENSMUSG00000004880	14.45172895	0.148678821	0.831355785	0.17883898	0.858064137	NA	protein_coding	Lbr	20.75673863	9.709835434	15.89541525	11.44492649	35.48719823	16.25480865	26.65501769	19.89610414	NA
ENSMUSG00000004885	0.260111966	-1.461880636	4.983578111	-0.293339565	0.769262614	NA	protein_coding	Crabp2	0	0	0	1.040447863	0	0	0	4.504123399	NA
ENSMUSG00000004894	0.441539312	-2.269171085	4.900751531	-0.463025124	0.643346359	NA	protein_coding	Hapln2	0	0	1.76615725	0	0	0	4.1141344	0	NA
ENSMUSG00000004895	2.208266634	1.092394785	2.010165115	0.543435351	0.586830091	NA	protein_coding	Prcc	3.113510794	2.91295063	1.76615725	1.040447863	5.999722313	5.520411559	3.277367156	1.933985245	NA
ENSMUSG00000004897	17.00801247	0.543672201	0.749618061	0.725265611	0.468289098	NA	protein_coding	Hdgf	23.87024942	16.50672024	14.129258	13.52582221	71.99429319	49.86995902	44.25328519	41.66269829	NA
ENSMUSG00000004902	33.80041152	0.062324878	0.540012659	0.115413736	0.908117192	NA	protein_coding	Slc25a18	33.21078181	35.92639111	37.97238087	28.09209229	71.63644028	80.33715199	83.50802728	60.49254816	NA
ENSMUSG00000004929	0.242745886	1.495318361	4.995051494	0.299359949	0.764665418	NA	protein_coding	Thop1	0	0.970983543	0	0	0	1.568255588	0	0	NA
ENSMUSG00000004931	0.745603737	0.95759358	3.755317249	0.25499672	0.798725633	NA	protein_coding	Apba3	0	1.941967087	0	1.040447863	0	4.421539751	0	2.460010931	NA
ENSMUSG00000004933	14.05921567	-0.027197859	0.825385108	-0.03295172	0.973713089	NA	protein_coding	Matk	10.37836931	17.47770378	15.89541525	12.48537435	24.16100943	40.75749027	38.42756603	29.68452651	NA
ENSMUSG00000004934	19.08842078	-0.852471698	0.72195058	-1.180789547	0.237686338	NA	protein_coding	Pias4	16.6053909	10.68081898	28.258516	20.80895725	26.00510924	17.34051828	45.11951558	32.53290099	NA
ENSMUSG00000004936	8.432910393	-0.508179953	1.054463096	-0.481932421	0.629853954	NA	protein_coding	Map2k1	5.189184657	8.738851891	11.48002212	8.323582901	8.639767487	14.30918394	18.40605048	13.36796496	NA
ENSMUSG00000004937	2.88728895	0.139350387	1.791220994	0.077796312	0.93799008	NA	protein_coding	Sgta	4.151347726	1.941967087	4.415393125	1.040447863	8.200928495	3.756411611	8.555350202	2.089953759	NA
ENSMUSG00000004939	0.723627508	-0.948687464	3.532958224	-0.26852496	0.788295265	NA	protein_coding	Nmrk2	0	0.970983543	0.883078625	1.040447863	0	2.017891746	1.90253786	2.204508691	NA
ENSMUSG00000004945	0.242745886	1.495318361	4.995051494	0.299359949	0.764665418	NA	protein_coding	Tmem242	0	0.970983543	0	0	0	8.643809298	0	0	NA
ENSMUSG00000004947	1.440686667	0.202577278	2.800808426	0.072328145	0.942340767	NA	protein_coding	Dtx2	3.113510794	0	2.649235875	0	4.847193496	0	3.971692005	0	NA
ENSMUSG00000004951	0.242745886	1.495318361	4.995051494	0.299359949	0.764665418	NA	protein_coding	Hspb1	0	0.970983543	0	0	0	4.680158114	0	0	NA
ENSMUSG00000004980	20.26226243	-1.59047107	0.720420456	-2.207698374	0.027265306	NA	protein_coding	Hnrnpa2b1	12.45404318	7.767868347	26.49235875	34.33477946	28.65375312	17.90235271	63.29608094	80.67667922	NA
ENSMUSG00000004988	10.04283855	0.869611269	0.967713089	0.898625097	0.368852386	NA	protein_coding	Fxyd4	11.41620625	14.56475315	7.947707625	6.242687175	77.83345361	102.9427022	55.2448598	42.48923996	NA
ENSMUSG00000004994	1.666719206	0.5718158	2.412502164	0.23702188	0.812639816	NA	protein_coding	Ccdc130	2.075673863	1.941967087	2.649235875	0	4.050817909	3.727202834	4.978737011	0	NA
ENSMUSG00000004996	2.131540214	-0.937955536	2.179587382	-0.430336284	0.666951036	NA	protein_coding	Mri1	0	2.91295063	3.5323145	2.080895725	0	9.217322132	11.1961346	6.837652183	NA
ENSMUSG00000005034	6.270090989	0.163960457	1.243381219	0.131866602	0.895089805	NA	protein_coding	Prkacb	9.340532383	3.883934174	3.5323145	8.323582901	8.791972334	3.662044761	3.452701967	8.001429727	NA
ENSMUSG00000005043	4.645448705	-0.672179318	1.462802893	-0.459514622	0.645864655	NA	protein_coding	Sgsh	6.227021589	0.970983543	6.181550375	5.202239313	5.565711032	0.899704915	5.633044656	4.641875674	NA
ENSMUSG00000005045	14.77166468	-0.149604327	0.799441696	-0.187136007	0.851553997	NA	protein_coding	Chd5	13.49188011	14.56475315	18.54465112	12.48537435	5.669220186	6.018822529	7.503855688	5.060628761	NA
ENSMUSG00000005054	0.260111966	-1.461880636	4.983578111	-0.293339565	0.769262614	NA	protein_coding	Cstb	0	0	0	1.040447863	0	0	0	6.877405975	NA
ENSMUSG00000005057	0.260111966	-1.461880636	4.983578111	-0.293339565	0.769262614	NA	protein_coding	Sh2b2	0	0	0	1.040447863	0	0	0	1.451078957	NA
ENSMUSG00000005069	2.241040595	1.978573454	2.248129669	0.880097568	0.378806456	NA	protein_coding	Pex5	6.227021589	0.970983543	1.76615725	0	7.735257614	1.250415131	2.236810936	0	NA
ENSMUSG00000005078	0.519571198	0.020044196	4.38467679	0.004571419	0.996352548	NA	protein_coding	Jkamp	1.037836931	0	0	1.040447863	4.080838793	0	0	3.946323647	NA
ENSMUSG00000005087	11.27481774	-0.584208605	0.911637987	-0.640833986	0.521630549	NA	protein_coding	Cd44	8.302695451	9.709835434	11.48002212	15.60671794	6.417554552	7.348855818	8.703374827	12.26604305	NA
ENSMUSG00000005089	0.242745886	1.495318361	4.995051494	0.299359949	0.764665418	NA	protein_coding	Slc1a2	0	0.970983543	0	0	0	1.607178118	0	0	NA
ENSMUSG00000005102	8.693633451	2.362800792	1.123847526	2.102421136	0.035516401	NA	protein_coding	Eif2ak4	15.56755397	13.59376961	3.5323145	2.080895725	11.84202637	10.71996801	2.739494963	1.580224739	NA
ENSMUSG00000005107	1.220569744	-0.453172157	2.786786368	-0.162614602	0.870821889	NA	protein_coding	Slc2a9	2.075673863	0	1.76615725	1.040447863	2.507878874	0	2.093010034	1.278233528	NA
ENSMUSG00000005124	0.502205119	2.509874644	4.327787919	0.579944002	0.561952381	NA	protein_coding	Wisp1	1.037836931	0.970983543	0	0	1.386163176	1.299074958	0	0	NA
ENSMUSG00000005125	0.943744431	0.158748904	3.113803536	0.050982312	0.959339615	NA	protein_coding	Ndrg1	1.037836931	0.970983543	1.76615725	0	1.370838841	1.32958801	2.378439708	0	NA
ENSMUSG00000005131	0.242745886	1.495318361	4.995051494	0.299359949	0.764665418	NA	protein_coding	4930550C14Rik	0	0.970983543	0	0	0	3.049665562	0	0	NA
ENSMUSG00000005142	9.732858509	0.697784491	1.004810936	0.694443568	0.487404079	NA	protein_coding	Man2b1	13.49188011	10.68081898	10.5969435	4.16179145	16.76710952	12.99713646	12.91697587	5.259064334	NA
ENSMUSG00000005161	21.40865044	-0.388226138	0.688752832	-0.563665397	0.572981871	NA	protein_coding	Prdx2	19.7189017	17.47770378	31.7908305	16.6471658	47.42449608	43.57649725	77.95202022	39.96899265	NA
ENSMUSG00000005198	41.13438035	-0.164904128	0.496721671	-0.331984968	0.739900609	NA	protein_coding	Polr2a	42.55131419	34.95540756	37.08930225	49.9414974	27.80559376	22.46420863	23.33903058	31.47986164	NA
ENSMUSG00000005204	12.42535309	-0.826455341	0.890430032	-0.92815304	0.35332819	NA	protein_coding	Senp3	7.26485852	10.68081898	20.31080837	11.44492649	12.74913402	18.35335547	34.96030684	20.4225033	NA
ENSMUSG00000005220	5.400925475	0.321356696	1.289550888	0.249200477	0.803205711	NA	protein_coding	Corin	5.189184657	6.796884804	4.415393125	5.202239313	4.07135765	5.3417941	3.597448226	4.16843525	NA
ENSMUSG00000005233	0.722974775	1.096901471	3.528512374	0.310867968	0.755900997	NA	protein_coding	Spc25	1.037836931	0.970983543	0.883078625	0	3.015637904	2.924892321	2.616103631	0	NA
ENSMUSG00000005237	0.949007314	1.639608198	3.419807121	0.479444641	0.631622342	NA	protein_coding	Dnah2	0	2.91295063	0.883078625	0	0	0.830757169	0.246602652	0	NA
ENSMUSG00000005262	1.480681709	-0.902426206	2.559346943	-0.352600185	0.724388199	NA	protein_coding	Ufd1l	2.075673863	0	1.76615725	2.080895725	5.837599478	0	4.871907654	5.950698379	NA
ENSMUSG00000005267	0.260111966	-1.461880636	4.983578111	-0.293339565	0.769262614	NA	protein_coding	Zfp287	0	0	0	1.040447863	0	0	0	1.788983986	NA
ENSMUSG00000005268	0.260111966	-1.461880636	4.983578111	-0.293339565	0.769262614	NA	protein_coding	Prlr	0	0	0	1.040447863	0	0	0	3.18188908	NA
ENSMUSG00000005299	6.642165983	0.849876854	1.178144737	0.721368799	0.470682638	NA	protein_coding	Letm1	9.340532383	7.767868347	5.29847175	4.16179145	14.66782941	11.99647447	8.012347882	6.304150798	NA
ENSMUSG00000005312	6.480062914	0.026189875	1.207663787	0.021686396	0.982698116	NA	protein_coding	Ubqln1	6.227021589	6.796884804	3.5323145	9.364030763	6.712314839	7.173964992	3.734614791	10.26354099	NA
ENSMUSG00000005354	1.221222477	-1.916963728	2.884949121	-0.66447055	0.506389192	NA	protein_coding	Txn2	1.037836931	0	1.76615725	2.080895725	2.577383119	0	4.554747151	5.277676672	NA
ENSMUSG00000005360	0.519571198	0.020044196	4.38467679	0.004571419	0.996352548	NA	protein_coding	Slc1a3	1.037836931	0	0	1.040447863	0.962933931	0	0	0.963719366	NA
ENSMUSG00000005362	37.10295151	0.2235061	0.51575304	0.433358765	0.664754153	NA	protein_coding	Crbn	35.28645567	44.665243	36.20622362	32.25388374	55.54331535	69.14344594	54.88099095	48.97312715	NA
ENSMUSG00000005370	10.68189043	-0.008585248	1.085181126	-0.007911351	0.993687721	NA	protein_coding	Msh6	12.45404318	8.738851891	1.76615725	19.76850939	11.05172745	7.593317756	1.537247052	17.83758947	NA
ENSMUSG00000005371	4.439162231	1.058749715	1.438313601	0.736104918	0.46166685	NA	protein_coding	Fbxo11	5.189184657	6.796884804	2.649235875	3.121343588	4.926786611	6.464153217	2.611982726	3.026556655	NA
ENSMUSG00000005374	2.164966908	-0.892671345	2.03235504	-0.43923002	0.660494875	NA	protein_coding	Tbl2	2.075673863	0.970983543	3.5323145	2.080895725	5.210801401	2.52699984	9.040870886	5.21505169	NA
ENSMUSG00000005378	28.42598976	0.525942665	0.581911951	0.903818292	0.366091761	NA	protein_coding	Wbscr22	32.17294487	34.95540756	24.7262015	21.84940511	102.1332865	109.1310717	75.58730314	66.90647797	NA
ENSMUSG00000005410	1.628682362	-1.230647006	2.492395684	-0.493760687	0.6214752	NA	protein_coding	Mcm5	0	1.941967087	3.5323145	1.040447863	0	2.811277447	5.122221005	1.564109708	NA
ENSMUSG00000005413	27.52781686	-0.419350015	0.589290438	-0.711618563	0.476701009	NA	protein_coding	Hmox1	22.83241249	24.27458859	31.7908305	31.21343588	85.10880092	90.63827955	123.0579255	118.824734	NA
ENSMUSG00000005417	15.39728329	0.20586899	0.824475485	0.249696921	0.802821739	NA	protein_coding	Mprip	16.6053909	16.50672024	21.193887	7.283135038	17.10412525	17.62627314	22.25706414	7.489158491	NA
ENSMUSG00000005442	28.72857492	-0.901001525	0.605517562	-1.487985784	0.136754643	NA	protein_coding	Cic	20.75673863	19.41967087	47.68624575	27.05164443	11.56647209	10.64244025	25.5887979	14.54077409	NA
ENSMUSG00000005447	2.103648369	-1.638313857	2.280538181	-0.718389137	0.472517383	NA	protein_coding	Pafah1b3	2.075673863	0	5.29847175	1.040447863	10.5425304	0	26.39555938	5.37339182	NA
ENSMUSG00000005465	9.226778634	-1.044029811	1.06051665	-0.984453955	0.324892361	NA	protein_coding	Il27ra	7.26485852	4.854917717	18.54465112	6.242687175	10.3951886	6.958637145	27.55553994	9.122615876	NA
ENSMUSG00000005469	3.286751341	0.701451333	1.698957454	0.412871629	0.679700668	NA	protein_coding	Prkaca	5.189184657	2.91295063	0.883078625	4.16179145	9.172594223	5.337945323	1.591468062	7.344060818	NA
ENSMUSG00000005483	7.129887919	0.005213094	1.181982058	0.004410468	0.996480967	NA	protein_coding	Dnajb1	11.41620625	2.91295063	7.947707625	6.242687175	20.60729161	5.148605674	14.07134121	11.45811364	NA
ENSMUSG00000005505	16.63170809	0.169513837	0.769748969	0.220219635	0.825700106	NA	protein_coding	Kbtbd4	17.64322783	17.47770378	10.5969435	20.80895725	28.55066628	29.3204425	17.48333674	33.61641667	NA
ENSMUSG00000005506	11.40564162	0.191098312	0.915804267	0.208667199	0.834708048	NA	protein_coding	Celf1	15.56755397	8.738851891	8.83078625	12.48537435	15.85339293	8.752130418	8.659965678	12.26465883	NA
ENSMUSG00000005510	15.46805308	-0.360470458	0.786725613	-0.458190826	0.64681535	NA	protein_coding	Ndufs3	14.52971704	12.62278606	21.193887	13.52582221	61.94023717	52.69001537	88.61777124	58.63026052	NA
ENSMUSG00000005514	0.762317084	1.004601827	3.464905407	0.289936292	0.771864976	NA	protein_coding	Por	1.037836931	0.970983543	0	1.040447863	1.561099962	1.463021023	0	1.598322886	NA
ENSMUSG00000005533	17.88751444	0.179696327	0.725911811	0.247545673	0.804485949	NA	protein_coding	Igf1r	16.6053909	21.36163796	15.89541525	17.68761366	5.311986227	7.084192069	5.184241365	5.648588989	NA
ENSMUSG00000005534	1.706061516	0.508862131	2.236383793	0.227537926	0.820005481	NA	protein_coding	Insr	2.075673863	1.941967087	1.76615725	1.040447863	1.873778974	1.724084977	1.535336474	0.906007153	NA
ENSMUSG00000005540	3.492113115	-0.409777163	1.637551882	-0.250237667	0.802403557	NA	protein_coding	Fcer2a	2.075673863	3.883934174	1.76615725	6.242687175	5.375923014	9.849704038	4.486604566	16.44023189	NA
ENSMUSG00000005553	0.944397164	-1.499740552	3.180931672	-0.471478393	0.637299146	NA	protein_coding	Atp4a	0	0.970983543	1.76615725	1.040447863	0	1.06578383	2.009715429	1.164348743	NA
ENSMUSG00000005566	11.41551465	0.559245849	0.909636764	0.614801282	0.538685963	NA	protein_coding	Trim28	14.52971704	12.62278606	7.064629	11.44492649	18.58420773	16.73747945	9.212590194	14.6137878	NA
ENSMUSG00000005575	5.108964247	-0.596463439	1.364622302	-0.437090496	0.66204572	NA	protein_coding	Ube2m	6.227021589	1.941967087	7.064629	5.202239313	20.96349674	6.429582555	22.90275187	16.89373744	NA
ENSMUSG00000005580	0.502857851	-0.02547562	4.438514814	-0.005739672	0.995420429	NA	protein_coding	Adcy9	0	0.970983543	0	1.040447863	0	0.823533798	0	0.916378574	NA
ENSMUSG00000005583	3.21002492	-0.644590295	1.675088155	-0.384809775	0.700378357	NA	protein_coding	Mef2c	2.075673863	2.91295063	2.649235875	5.202239313	3.289414518	4.624126619	4.35978589	8.419618595	NA
ENSMUSG00000005609	10.44499453	-0.568389954	0.982270369	-0.578649191	0.562825906	NA	protein_coding	Ctr9	4.151347726	12.62278606	11.48002212	13.52582221	4.179027192	13.17313817	11.78241481	13.59291666	NA
ENSMUSG00000005610	26.42613312	-0.773866717	0.618371239	-1.251459753	0.210766789	NA	protein_coding	Eif4g2	18.68106477	20.39065441	40.62161675	26.01119656	19.87342854	21.33339101	41.61437056	26.69215032	NA
ENSMUSG00000005611	0.441539312	-2.269171085	4.900751531	-0.463025124	0.643346359	NA	protein_coding	Mrvi1	0	0	1.76615725	0	0	0	1.513903417	0	NA
ENSMUSG00000005615	0.761664352	3.108943136	3.647427028	0.852366096	0.394010932	NA	protein_coding	Pcyt1a	2.075673863	0.970983543	0	0	4.262488909	1.997345153	0	0	NA
ENSMUSG00000005621	16.12013439	0.067082153	0.761563282	0.088084805	0.929809273	NA	protein_coding	Zfp592	14.52971704	18.44868732	15.89541525	15.60671794	9.210008652	12.12317271	10.27259717	9.875915325	NA
ENSMUSG00000005625	7.598394377	0.509912211	1.124910205	0.453291479	0.650338868	NA	protein_coding	Psmd4	5.189184657	12.62278606	5.29847175	7.283135038	15.38676922	36.80959968	15.12912782	20.83141335	NA
ENSMUSG00000005628	3.411470298	0.968513846	1.655572525	0.585002367	0.558546125	NA	protein_coding	Tmod4	5.189184657	3.883934174	3.5323145	1.040447863	16.11070939	11.80714225	10.75646093	3.284568344	NA
ENSMUSG00000005640	0.220769656	-1.342306881	4.991527626	-0.268917049	0.787993517	NA	protein_coding	Insrr	0	0	0.883078625	0	0	0	0.700067223	0	NA
ENSMUSG00000005656	1.385936476	-2.207022729	2.7881512	-0.79157211	0.428610214	NA	protein_coding	Snx6	0	0.970983543	3.5323145	1.040447863	0	2.041089676	7.30242556	2.106131546	NA
ENSMUSG00000005667	2.423773408	0.142947437	1.958840408	0.07297554	0.941825582	NA	protein_coding	Mthfd2	4.151347726	0.970983543	3.5323145	1.040447863	8.022940959	1.845499412	6.573835043	1.939620947	NA
ENSMUSG00000005672	0.259459233	1.543782485	4.991667435	0.309271903	0.757114702	NA	protein_coding	Kit	1.037836931	0	0	0	0.785439922	0	0	0	NA
ENSMUSG00000005674	2.164966908	-0.892671345	2.03235504	-0.43923002	0.660494875	NA	protein_coding	Tomm40l	2.075673863	0.970983543	3.5323145	2.080895725	2.819498158	1.321179034	4.982612445	2.886726375	NA
ENSMUSG00000005681	0.943744431	0.158748904	3.113803536	0.050982312	0.959339615	NA	protein_coding	Apoa2	1.037836931	0.970983543	1.76615725	0	8.630739517	7.941239895	14.1437057	0	NA
ENSMUSG00000005682	4.114427042	-0.436527187	1.471850786	-0.29658386	0.766784235	NA	protein_coding	Pan2	3.113510794	3.883934174	5.29847175	4.16179145	2.728897987	3.33323691	4.554933595	3.70902432	NA
ENSMUSG00000005683	10.74448983	0.608935291	0.932724644	0.652856441	0.513848833	NA	protein_coding	Cs	11.41620625	14.56475315	9.713864875	7.283135038	14.89983776	19.04144783	13.16548423	9.707797298	NA
ENSMUSG00000005686	11.70913597	-0.400478115	0.896984073	-0.446471824	0.655256461	NA	protein_coding	Ampd3	12.45404318	7.767868347	14.129258	12.48537435	16.28197958	10.52801841	18.8330948	16.29526029	NA
ENSMUSG00000005687	0.220769656	-1.342306881	4.991527626	-0.268917049	0.787993517	NA	protein_coding	Bcas2	0	0	0.883078625	0	0	0	3.2074707	0	NA
ENSMUSG00000005696	2.728490566	0.310128144	1.790386288	0.173218565	0.862479631	NA	protein_coding	Sh2d1a	3.113510794	2.91295063	1.76615725	3.121343588	14.5313411	13.31207764	8.084984496	14.81287441	NA
ENSMUSG00000005699	0.259459233	1.543782485	4.991667435	0.309271903	0.757114702	NA	protein_coding	Pard6a	1.037836931	0	0	0	3.207453841	0	0	0	NA
ENSMUSG00000005705	1.247808856	1.997537723	2.881988982	0.693110812	0.488240013	NA	protein_coding	Agrp	1.037836931	2.91295063	0	1.040447863	6.219591655	17.16814739	0	6.014577606	NA
ENSMUSG00000005718	1.801459481	0.410125925	2.378999228	0.172394308	0.863127547	NA	protein_coding	Tfap4	3.113510794	0.970983543	0	3.121343588	5.412940698	1.652921235	0	5.517812168	NA
ENSMUSG00000005732	7.049856814	-1.556866745	1.238944117	-1.256607722	0.208895717	NA	protein_coding	Ranbp1	6.227021589	0.970983543	10.5969435	10.40447863	26.99254855	4.216115447	47.70118679	46.06026643	NA
ENSMUSG00000005774	5.348322788	0.422148607	1.414780956	0.298384428	0.765409772	NA	protein_coding	Rfx5	8.302695451	3.883934174	0.883078625	8.323582901	9.771804457	4.49557325	1.000852289	9.449700161	NA
ENSMUSG00000005779	13.72517752	-0.145041441	0.821794	-0.176493673	0.859906119	NA	protein_coding	Psmb4	12.45404318	13.59376961	13.24617937	15.60671794	52.40657854	56.01092452	54.67144758	66.7773935	NA
ENSMUSG00000005802	1.508573554	-0.070256273	2.756421689	-0.025488216	0.979665547	NA	protein_coding	Slc30a4	0	2.91295063	0	3.121343588	0	2.067135915	0	2.258307018	NA
ENSMUSG00000005803	0.259459233	1.543782485	4.991667435	0.309271903	0.757114702	NA	protein_coding	Sqrdl	1.037836931	0	0	0	2.179840039	0	0	0	NA
ENSMUSG00000005804	0.921768202	-1.391049049	3.458944978	-0.402159924	0.687566334	NA	protein_coding	Bloc1s6	1.037836931	0	2.649235875	0	1.184004833	0	2.910448614	0	NA
ENSMUSG00000005813	2.544534948	-1.189820649	4.109244229	-0.289547319	0.772162575	NA	protein_coding	Metap1	3.113510794	0	7.064629	0	8.678439823	0	19.31412963	0	NA
ENSMUSG00000005823	0.762317084	1.004601827	3.464905407	0.289936292	0.771864976	NA	protein_coding	Gpr108	1.037836931	0.970983543	0	1.040447863	1.870603082	1.753079048	0	1.91520581	NA
ENSMUSG00000005824	0.762317084	1.004601827	3.464905407	0.289936292	0.771864976	NA	protein_coding	Tnfsf14	1.037836931	0.970983543	0	1.040447863	2.152165138	2.087402894	0	2.153920592	NA
ENSMUSG00000005846	1.684738019	-1.238651091	2.298798884	-0.53882534	0.590007377	NA	protein_coding	Rsl1d1	1.037836931	0.970983543	2.649235875	2.080895725	2.17072739	1.997310533	5.335949943	4.198349046	NA
ENSMUSG00000005871	5.699727017	0.42264203	1.264899893	0.334130813	0.738280849	NA	protein_coding	Apc	6.227021589	6.796884804	3.5323145	6.242687175	2.376541742	2.539992189	1.322266335	2.42258537	NA
ENSMUSG00000005873	6.58476384	-0.721286949	1.198265565	-0.601942482	0.547212425	NA	protein_coding	Reep5	3.113510794	6.796884804	7.064629	9.364030763	4.229247237	9.248253238	9.96522489	12.99026869	NA
ENSMUSG00000005881	0.502857851	-0.02547562	4.438514814	-0.005739672	0.995420429	NA	protein_coding	Ergic3	0	0.970983543	0	1.040447863	0	2.913863315	0	3.006717207	NA
ENSMUSG00000005882	1.14780074	-0.456705651	3.080658051	-0.148249382	0.882145961	NA	protein_coding	Uqcc1	0	1.941967087	2.649235875	0	0	3.523303931	4.706372168	0	NA
ENSMUSG00000005883	0.779683164	-1.00613218	3.700049784	-0.271923958	0.78568049	NA	protein_coding	Spo11	1.037836931	0	0	2.080895725	2.491723826	0	0	5.079998033	NA
ENSMUSG00000005886	15.21173383	-1.152125738	0.846737111	-1.36066522	0.173619511	NA	protein_coding	Ncoa2	5.189184657	13.59376961	15.01233662	27.05164443	2.427012176	6.368686046	7.291320183	12.92138611	NA
ENSMUSG00000005897	1.181880167	-1.865356717	2.938160633	-0.634872272	0.525511722	NA	protein_coding	Nr2c1	1.037836931	0	2.649235875	1.040447863	1.702311978	0	4.184519689	1.646199312	NA
ENSMUSG00000005899	9.039733777	0.292860985	1.015484046	0.288395457	0.773044045	NA	protein_coding	Smpd4	7.26485852	12.62278606	7.947707625	8.323582901	6.160469959	10.48091747	6.610328873	7.176941967	NA
ENSMUSG00000005907	25.91764072	0.255474249	0.647080274	0.394810752	0.69298256	NA	protein_coding	Pex1	29.05943408	27.18753922	14.129258	33.2943316	25.04571756	23.47217489	12.64592866	29.30618122	NA
ENSMUSG00000005936	18.45434278	0.643659718	0.719700106	0.894344342	0.371137682	NA	protein_coding	Kctd20	19.7189017	25.24557213	13.24617937	15.60671794	31.39991527	41.67531701	21.5051207	24.80962674	NA
ENSMUSG00000005947	9.03922933	-0.134255284	1.060154213	-0.126637505	0.899227312	NA	protein_coding	Itgae	10.37836931	6.796884804	4.415393125	14.56627008	11.71743186	7.546938013	4.800512964	15.86367241	NA
ENSMUSG00000005949	3.448160656	-1.277671624	1.647319599	-0.7756064	0.43798142	NA	protein_coding	Ctns	2.075673863	1.941967087	3.5323145	6.242687175	2.822452979	2.58563287	4.711090688	8.63140736	NA
ENSMUSG00000005950	1.484639127	2.422150948	2.691767871	0.899836488	0.368207273	NA	protein_coding	P2rx5	3.113510794	1.941967087	0.883078625	0	5.333351121	3.332182436	1.570848202	0	NA
ENSMUSG00000005951	0.519571198	0.020044196	4.38467679	0.004571419	0.996352548	NA	protein_coding	Shpk	1.037836931	0	0	1.040447863	1.428858562	0	0	1.430024038	NA
ENSMUSG00000005968	0.220769656	-1.342306881	4.991527626	-0.268917049	0.787993517	NA	protein_coding	Tuft1	0	0	0.883078625	0	0	0	1.449820732	0	NA
ENSMUSG00000005973	0.463515542	0.085921865	4.576464125	0.018774727	0.985020815	NA	protein_coding	Rcn1	0	0.970983543	0.883078625	0	0	1.869711407	1.703331533	0	NA
ENSMUSG00000005980	27.40421345	0.491038039	0.593205779	0.827770154	0.40780068	NA	protein_coding	Dnase1	30.09727101	33.98442402	24.7262015	20.80895725	88.71550955	100.3435476	75.68588304	62.64196235	NA
ENSMUSG00000005981	5.67379337	-0.583096888	1.271459782	-0.458604272	0.646518368	NA	protein_coding	Trap1	5.189184657	3.883934174	5.29847175	8.323582901	8.67143594	6.728398356	9.027095071	13.88561434	NA
ENSMUSG00000005982	6.522016154	-0.937699013	1.308999909	-0.716347654	0.473776709	NA	protein_coding	Naa60	2.075673863	6.796884804	2.649235875	14.56627008	3.542619651	11.40861378	4.354125999	23.98091933	NA
ENSMUSG00000006005	20.80096799	-0.306448296	0.673579073	-0.454955191	0.649141476	NA	protein_coding	Tpr	19.7189017	17.47770378	22.07696562	23.93030084	10.01871399	8.895097984	11.64806227	12.41709543	NA
ENSMUSG00000006010	2.186943137	-0.239070006	1.980506947	-0.120711521	0.903919533	NA	protein_coding	BC003331	2.075673863	1.941967087	2.649235875	2.080895725	2.511763979	2.436180805	3.268480041	2.513812747	NA
ENSMUSG00000006019	2.242346061	0.409214422	2.003190747	0.204281306	0.838133677	NA	protein_coding	Dhx34	4.151347726	0.970983543	1.76615725	2.080895725	3.97068052	0.909379372	1.65691299	2.023804667	NA
ENSMUSG00000006021	0.463515542	0.085921865	4.576464125	0.018774727	0.985020815	NA	protein_coding	Kptn	0	0.970983543	0.883078625	0	0	2.273975628	2.143982567	0	NA
ENSMUSG00000006024	1.6060534	-1.154523097	2.543865628	-0.453845944	0.649939713	NA	protein_coding	Napa	1.037836931	0.970983543	4.415393125	0	2.650470839	2.570713743	11.49658315	0	NA
ENSMUSG00000006050	14.61494818	-0.226758097	0.83100539	-0.272871993	0.784951616	NA	protein_coding	Sra1	12.45404318	14.56475315	22.07696562	9.364030763	57.82696185	66.50904241	98.7129985	41.94062517	NA
ENSMUSG00000006058	16.34412607	1.053970112	0.771354275	1.366389149	0.171816853	NA	protein_coding	Snf8	20.75673863	23.30360504	8.83078625	12.48537435	92.6228013	101.8214559	38.65028221	56.65037715	NA
ENSMUSG00000006095	3.334091145	0.126293955	1.675584714	0.075373064	0.93991789	NA	protein_coding	Tbcb	3.113510794	3.883934174	5.29847175	1.040447863	13.01058501	16.25756185	22.99228415	4.440269959	NA
ENSMUSG00000006127	3.448160656	-1.277671624	1.647319599	-0.7756064	0.43798142	NA	protein_coding	Inpp5k	2.075673863	1.941967087	3.5323145	6.242687175	2.960726623	2.871633412	5.136934814	8.889424786	NA
ENSMUSG00000006134	3.226738267	-0.630767412	1.67307885	-0.377009973	0.706166194	NA	protein_coding	Crkl	3.113510794	1.941967087	2.649235875	5.202239313	3.204714583	1.965795804	2.625878108	5.165131312	NA
ENSMUSG00000006154	16.22902368	-0.960797971	0.768219344	-1.250681825	0.211050584	NA	protein_coding	Eps8l1	10.37836931	11.65180252	22.07696562	20.80895725	15.97761541	17.56440142	33.33624852	32.57433829	NA
ENSMUSG00000006169	17.99640373	-0.733479975	0.727036376	-1.008862829	0.313040424	NA	protein_coding	Clint1	12.45404318	14.56475315	22.07696562	22.88985298	17.58718475	20.60279743	32.37504539	33.01197942	NA
ENSMUSG00000006179	0.259459233	1.543782485	4.991667435	0.309271903	0.757114702	NA	protein_coding	Prss16	1.037836931	0	0	0	1.818191543	0	0	0	NA
ENSMUSG00000006191	0.905054855	-1.428454698	3.481969908	-0.410243263	0.681627507	NA	protein_coding	Cdkal1	0	0.970983543	2.649235875	0	0	6.959493205	18.59275598	0	NA
ENSMUSG00000006215	3.690253809	-0.531336931	1.554280676	-0.341853913	0.732460834	NA	protein_coding	Zbtb17	3.113510794	2.91295063	3.5323145	5.202239313	3.339142097	3.058968786	3.715680734	5.673058916	NA
ENSMUSG00000006219	0.260111966	-1.461880636	4.983578111	-0.293339565	0.769262614	NA	protein_coding	Fblim1	0	0	0	1.040447863	0	0	0	1.321989465	NA
ENSMUSG00000006221	0.220769656	-1.342306881	4.991527626	-0.268917049	0.787993517	NA	protein_coding	Hspb7	0	0	0.883078625	0	0	0	1.872087159	0	NA
ENSMUSG00000006235	1.02242905	-0.025575053	3.025748082	-0.008452473	0.993255983	NA	protein_coding	Epor	1.037836931	0.970983543	0	2.080895725	2.24812676	2.068526559	0	4.348045216	NA
ENSMUSG00000006262	1.661456324	-0.210315488	2.643306805	-0.079565296	0.936582998	NA	protein_coding	Mob1b	3.113510794	0	3.5323145	0	4.127550647	0	4.592994241	0	NA
ENSMUSG00000006269	3.363560422	-1.183469659	1.806701327	-0.65504444	0.512439142	NA	protein_coding	Atp6v1b1	4.151347726	0	6.181550375	3.121343588	8.199798252	0	12.67933608	6.296485906	NA
ENSMUSG00000006273	8.893815004	0.192799615	1.050784889	0.183481526	0.854420213	NA	protein_coding	Atp6v1b2	9.340532383	9.709835434	12.36310075	4.16179145	13.24941576	14.27857633	17.87960848	5.893432397	NA
ENSMUSG00000006276	5.216193444	-0.682033608	1.351842312	-0.504521572	0.613894907	NA	protein_coding	Eps15l1	3.113510794	4.854917717	3.5323145	9.364030763	4.598896279	7.052493114	5.024323071	13.3419138	NA
ENSMUSG00000006281	22.43756518	0.012983541	0.648753995	0.020013042	0.984032968	NA	protein_coding	Tep1	21.79457556	23.30360504	23.84312287	20.80895725	10.3723345	10.85946939	11.12975839	10.06980031	NA
ENSMUSG00000006288	1.021776317	1.610950175	3.093684745	0.520722151	0.602560341	NA	protein_coding	Ttc5	2.075673863	0.970983543	0	1.040447863	4.363030337	2.044457518	0	2.233531296	NA
ENSMUSG00000006299	10.11952395	-0.03964899	0.97828605	-0.040529035	0.967671359	NA	protein_coding	Aamp	7.26485852	12.62278606	7.064629	13.52582221	15.81713199	28.49074069	15.68178285	29.3986337	NA
ENSMUSG00000006304	18.52858258	-0.647158226	0.729665209	-0.886924878	0.375119346	NA	protein_coding	Arpc2	11.41620625	17.47770378	26.49235875	18.72806153	30.81145394	46.18831904	70.13027069	51.39556631	NA
ENSMUSG00000006307	18.27388178	-0.851089268	0.723887557	-1.175720262	0.239706679	NA	protein_coding	Kmt2b	12.45404318	13.59376961	22.07696562	24.9707487	5.614450097	6.138664091	10.33525714	11.4966425	NA
ENSMUSG00000006310	3.827728697	-1.472429182	1.60498057	-0.917412466	0.358926543	NA	protein_coding	Zbtb32	3.113510794	0.970983543	7.064629	4.16179145	7.088358845	2.291686095	16.39797341	9.458854132	NA
ENSMUSG00000006315	1.663414522	-4.17205998	2.692223159	-1.549670935	0.121220518	NA	protein_coding	Tmem147	0	0	3.5323145	3.121343588	0	0	16.44656908	14.55776257	NA
ENSMUSG00000006335	2.408365526	-1.155342364	1.94099172	-0.59523302	0.551687721	NA	protein_coding	Tfpt	1.037836931	1.941967087	3.5323145	3.121343588	4.779930472	8.959245325	16.89417032	14.68170993	NA
ENSMUSG00000006342	0.739688122	1.138058195	3.766402882	0.302160505	0.762529711	NA	protein_coding	Susd2	2.075673863	0	0.883078625	0	2.61052272	0	1.132330569	0	NA
ENSMUSG00000006344	3.594203111	-0.08653751	1.585160389	-0.054592274	0.956463294	NA	protein_coding	Ggt5	3.113510794	3.883934174	5.29847175	2.080895725	2.907633555	3.567128176	4.764911883	1.874526886	NA
ENSMUSG00000006356	0.519571198	0.020044196	4.38467679	0.004571419	0.996352548	NA	protein_coding	Crip2	1.037836931	0	0	1.040447863	3.534821442	0	0	3.603305829	NA
ENSMUSG00000006360	2.949912955	-0.441665016	1.729830927	-0.25532265	0.798473908	NA	protein_coding	Crip1	2.075673863	2.91295063	2.649235875	4.16179145	19.39952269	27.2710687	25.71210312	39.72417124	NA
ENSMUSG00000006362	1.761464439	1.411205093	2.305031201	0.612228195	0.540386789	NA	protein_coding	Cbfa2t3	4.151347726	0.970983543	0.883078625	1.040447863	6.026713572	1.461339923	1.307062366	1.507907344	NA
ENSMUSG00000006373	0.502205119	2.509874644	4.327787919	0.579944002	0.561952381	NA	protein_coding	Pgrmc1	1.037836931	0.970983543	0	0	2.226312053	2.048454604	0	0	NA
ENSMUSG00000006378	0.518918466	2.552600149	4.672415458	0.546312752	0.584850972	NA	protein_coding	Gcat	2.075673863	0	0	0	5.621466902	0	0	0	NA
ENSMUSG00000006386	0.259459233	1.543782485	4.991667435	0.309271903	0.757114702	NA	protein_coding	Tek	1.037836931	0	0	0	0.879262028	0	0	0	NA
ENSMUSG00000006390	1.784746134	0.391201311	2.358730961	0.165852451	0.868273068	NA	protein_coding	Elovl1	2.075673863	1.941967087	0	3.121343588	6.399450074	6.206879929	0	9.607004859	NA
ENSMUSG00000006392	1.668024672	-1.271157094	2.436977442	-0.521612171	0.601940388	NA	protein_coding	Med8	0	1.941967087	2.649235875	2.080895725	0	6.905739736	9.22457498	7.257936448	NA
ENSMUSG00000006395	5.676445322	0.717443556	1.267932261	0.565837449	0.571504286	NA	polymorphic_pseudogene	Hyi	8.302695451	5.82590126	4.415393125	4.16179145	37.13380422	25.51354766	19.36931286	18.92662124	NA
ENSMUSG00000006398	0.744951005	3.080623449	3.677026233	0.837802957	0.402141378	NA	protein_coding	Cdc20	1.037836931	1.941967087	0	0	2.44281459	4.578680657	0	0	NA
ENSMUSG00000006403	0.220769656	-1.342306881	4.991527626	-0.268917049	0.787993517	NA	protein_coding	Adamts4	0	0	0.883078625	0	0	0	0.785782832	0	NA
ENSMUSG00000006411	2.226285447	-0.276011409	1.971190035	-0.14002273	0.888642032	NA	protein_coding	Pvrl4	2.075673863	1.941967087	1.76615725	3.121343588	2.355852173	2.167645915	1.930337472	3.417295662	NA
ENSMUSG00000006412	0.502857851	-0.02547562	4.438514814	-0.005739672	0.995420429	NA	protein_coding	Pfdn2	0	0.970983543	0	1.040447863	0	7.169028325	0	7.977260881	NA
ENSMUSG00000006418	11.17754423	-1.138529303	0.945697051	-1.203904889	0.228626342	NA	protein_coding	Rnf114	6.227021589	7.767868347	20.31080837	10.40447863	11.17630581	13.96551215	37.85560226	19.07132343	NA
ENSMUSG00000006423	2.888594416	-0.911849293	1.760970909	-0.517810537	0.604590466	NA	protein_coding	C330007P06Rik	2.075673863	1.941967087	4.415393125	3.121343588	4.589467363	4.451362622	9.953550969	6.889816273	NA
ENSMUSG00000006435	3.190700642	1.279979747	1.714077523	0.746745541	0.455217174	NA	protein_coding	Neurl1a	5.189184657	3.883934174	2.649235875	1.040447863	5.550072381	4.085346905	2.728570022	1.073425489	NA
ENSMUSG00000006442	3.416815842	-1.879324735	1.905506641	-0.986259872	0.324005606	NA	protein_coding	Srm	0	2.91295063	9.713864875	1.040447863	0	9.153076754	30.57476609	3.394996636	NA
ENSMUSG00000006456	1.02242905	-0.025575053	3.025748082	-0.008452473	0.993255983	NA	protein_coding	Rbm14	1.037836931	0.970983543	0	2.080895725	2.037347414	1.909347364	0	4.171852001	NA
ENSMUSG00000006462	0.441539312	-2.269171085	4.900751531	-0.463025124	0.643346359	NA	lincRNA	A530013C23Rik	0	0	1.76615725	0	0	0	1.978741996	0	NA
ENSMUSG00000006463	0.701651278	-2.929320779	3.761265522	-0.778812546	0.436090146	NA	protein_coding	Zdhhc24	0	0	1.76615725	1.040447863	0	0	2.663425099	1.571695998	NA
ENSMUSG00000006464	0.260111966	-1.461880636	4.983578111	-0.293339565	0.769262614	NA	protein_coding	Bbs1	0	0	0	1.040447863	0	0	0	0.741041417	NA
ENSMUSG00000006469	0.259459233	1.543782485	4.991667435	0.309271903	0.757114702	NA	protein_coding	Slc34a3	1.037836931	0	0	0	1.955212464	0	0	0	NA
ENSMUSG00000006471	8.756340117	0.574294229	1.034105487	0.555353623	0.578652808	NA	protein_coding	Ndor1	9.340532383	11.65180252	8.83078625	5.202239313	7.771305742	10.04993889	7.490783345	4.320913641	NA
ENSMUSG00000006476	0.961110511	-1.465750497	3.161961056	-0.463557416	0.64296487	NA	protein_coding	Nsmf	1.037836931	0	1.76615725	1.040447863	1.545008926	0	2.531897934	1.494081381	NA
ENSMUSG00000006494	3.795524808	0.545551189	1.729216994	0.315490301	0.752389414	NA	protein_coding	Pdk1	3.113510794	5.82590126	0	6.242687175	3.073796547	5.631774521	0	6.266697876	NA
ENSMUSG00000006498	12.19052204	-0.179181236	0.910617899	-0.196768849	0.844008429	NA	protein_coding	Ptbp1	9.340532383	13.59376961	18.54465112	7.283135038	12.72834971	18.55570582	26.24243811	10.1358794	NA
ENSMUSG00000006517	4.698621464	1.177866991	1.403369852	0.839313307	0.401293518	NA	protein_coding	Mvd	6.227021589	6.796884804	2.649235875	3.121343588	13.80817217	15.6247714	5.989381103	6.909717533	NA
ENSMUSG00000006519	14.68725375	0.410509368	0.864651141	0.474768781	0.634951787	NA	protein_coding	Cyba	24.90808635	8.738851891	16.77849387	8.323582901	145.2240478	50.10835107	94.20329697	46.8123608	NA
ENSMUSG00000006526	1.03979513	-1.596433333	3.32143994	-0.48064495	0.630768863	NA	protein_coding	Tmem110	1.037836931	0	0	3.121343588	3.280702615	0	0	10.03279095	NA
ENSMUSG00000006527	1.447255015	-0.970452931	2.581492754	-0.37592704	0.706971137	NA	protein_coding	Sfmbt1	0	1.941967087	1.76615725	2.080895725	0	2.375049262	2.239278271	2.594696545	NA
ENSMUSG00000006542	0.260111966	-1.461880636	4.983578111	-0.293339565	0.769262614	NA	protein_coding	Prkag3	0	0	0	1.040447863	0	0	0	2.539431221	NA
ENSMUSG00000006567	0.441539312	-2.269171085	4.900751531	-0.463025124	0.643346359	NA	protein_coding	Atp7b	0	0	1.76615725	0	0	0	1.47767755	0	NA
ENSMUSG00000006574	0.242745886	1.495318361	4.995051494	0.299359949	0.764665418	NA	protein_coding	Slc4a1	0	0.970983543	0	0	0	0.841983639	0	0	NA
ENSMUSG00000006575	1.706061516	0.508862131	2.236383793	0.227537926	0.820005481	NA	protein_coding	Rundc3a	2.075673863	1.941967087	1.76615725	1.040447863	4.400444982	4.123979037	3.888229518	2.252684676	NA
ENSMUSG00000006576	1.684085286	-0.291823204	2.27007301	-0.128552343	0.897711878	NA	protein_coding	Slc4a3	2.075673863	0.970983543	2.649235875	1.040447863	2.014491869	0.976936222	2.62139537	1.008067514	NA
ENSMUSG00000006585	3.932999695	-0.313814392	1.504278616	-0.20861454	0.834749159	NA	protein_coding	Cdt1	3.113510794	3.883934174	3.5323145	5.202239313	5.634118497	6.912020536	6.155309847	9.080671966	NA
ENSMUSG00000006587	0.961763244	-3.379784086	3.305617237	-1.022436611	0.3065743	NA	protein_coding	Snai3	0	0	1.76615725	2.080895725	0	0	4.156504905	5.076883381	NA
ENSMUSG00000006589	2.645195797	-0.68445913	1.862796273	-0.367436386	0.713293535	NA	protein_coding	Aprt	3.113510794	0.970983543	4.415393125	2.080895725	14.28827121	4.46352821	21.04184088	9.752640844	NA
ENSMUSG00000006599	0.260111966	-1.461880636	4.983578111	-0.293339565	0.769262614	NA	protein_coding	Gtf2h1	0	0	0	1.040447863	0	0	0	1.610546159	NA
ENSMUSG00000006611	1.62802963	-0.264102361	2.46781261	-0.107018807	0.91477406	NA	protein_coding	Hfe	1.037836931	1.941967087	3.5323145	0	2.861960401	5.266643506	9.380129144	0	NA
ENSMUSG00000006641	11.96874502	1.10167521	0.927873132	1.18731233	0.235104446	NA	protein_coding	Slc5a6	9.340532383	23.30360504	7.947707625	7.283135038	11.01126577	27.51856801	9.729545252	8.768525725	NA
ENSMUSG00000006642	0.905054855	-1.428454698	3.481969908	-0.410243263	0.681627507	NA	protein_coding	Tcf23	0	0.970983543	2.649235875	0	0	0.938950852	2.519469912	0	NA
ENSMUSG00000006649	15.61066717	-0.678904152	0.780957573	-0.869322708	0.384670646	NA	protein_coding	Nphs1	10.37836931	13.59376961	17.6615725	20.80895725	7.256736705	9.347806371	11.89204565	14.03507127	NA
ENSMUSG00000006651	0.220769656	-1.342306881	4.991527626	-0.268917049	0.787993517	NA	protein_coding	Aplp1	0	0	0.883078625	0	0	0	1.420930518	0	NA
ENSMUSG00000006673	21.64857906	0.264557949	0.660561845	0.400504436	0.688785017	NA	protein_coding	Qrich1	24.90808635	22.3326215	18.54465112	20.80895725	43.41398756	38.99115727	33.56549282	37.04096022	NA
ENSMUSG00000006675	0.259459233	1.543782485	4.991667435	0.309271903	0.757114702	NA	protein_coding	P4htm	1.037836931	0	0	0	2.190026207	0	0	0	NA
ENSMUSG00000006676	6.301287518	1.37056517	1.299885712	1.054373594	0.291711907	NA	protein_coding	Usp19	9.340532383	8.738851891	0.883078625	6.242687175	8.302977712	7.639662595	0.755921275	5.352859864	NA
ENSMUSG00000006678	1.03979513	-1.596433333	3.32143994	-0.48064495	0.630768863	NA	protein_coding	Pola1	1.037836931	0	0	3.121343588	0.75450675	0	0	2.307374176	NA
ENSMUSG00000006699	10.75855122	-0.068187436	0.924153333	-0.073783683	0.941182511	NA	protein_coding	Cdc42	9.340532383	11.65180252	10.5969435	11.44492649	26.25017922	32.80128541	30.92618198	32.84855378	NA
ENSMUSG00000006705	1.650005859	0.552788166	2.447235635	0.225882689	0.821292662	NA	protein_coding	Pknox1	1.037836931	2.91295063	2.649235875	0	1.56283157	4.54741007	4.06732785	0	NA
ENSMUSG00000006715	0.242745886	1.495318361	4.995051494	0.299359949	0.764665418	NA	protein_coding	Gmnn	0	0.970983543	0	0	0	3.589875569	0	0	NA
ENSMUSG00000006717	0.927031084	0.12304525	3.369836122	0.036513719	0.97087274	NA	protein_coding	Acot13	0	1.941967087	1.76615725	0	0	10.80036488	9.839273585	0	NA
ENSMUSG00000006731	24.15034333	-0.241896089	0.635468672	-0.380657772	0.703457207	NA	protein_coding	B4galnt1	22.83241249	21.36163796	21.193887	31.21343588	36.42579749	35.32968439	34.47254759	49.71205756	NA
ENSMUSG00000006732	1.479376244	1.195642292	2.803901944	0.426420865	0.6698012	NA	protein_coding	Mettl1	4.151347726	0	1.76615725	0	13.70890907	0	5.616400977	0	NA
ENSMUSG00000006736	6.506079221	-0.69846992	1.202859514	-0.580674561	0.56145981	NA	protein_coding	Tspan31	3.113510794	6.796884804	8.83078625	7.283135038	7.800595078	16.67418688	21.70057458	18.55402611	NA
ENSMUSG00000006740	6.326651093	0.772889334	1.215086709	0.636077515	0.5247259	NA	protein_coding	Kif5b	7.26485852	8.738851891	6.181550375	3.121343588	5.797233458	6.985300811	5.122430652	2.543769816	NA
ENSMUSG00000006763	1.248461589	0.51854334	2.986766809	0.173613601	0.862169142	NA	protein_coding	Saal1	0	2.91295063	0	2.080895725	0	7.620873286	0	5.242481284	NA
ENSMUSG00000006800	18.5012608	-0.22930712	0.711732929	-0.322181413	0.747315265	NA	protein_coding	Sulf2	16.6053909	17.47770378	21.193887	18.72806153	15.21520894	15.68088565	19.04732241	17.44874061	NA
ENSMUSG00000006818	3.491460383	0.020266169	1.613784156	0.012558166	0.989980297	NA	protein_coding	Sod2	3.113510794	3.883934174	1.76615725	5.202239313	12.96815919	16.20454807	7.639103102	22.12895409	NA
ENSMUSG00000006850	4.971489359	0.053613048	1.353544266	0.039609379	0.96840455	NA	protein_coding	Tmco6	6.227021589	3.883934174	3.5323145	6.242687175	13.08261961	8.459294485	7.566224185	13.0932907	NA
ENSMUSG00000006906	2.503110759	-0.53479876	1.909885778	-0.280016096	0.779465156	NA	protein_coding	Stambp	3.113510794	0.970983543	1.76615725	4.16179145	5.86898464	1.800039455	3.205951292	7.567370025	NA
ENSMUSG00000006920	1.746709291	-1.350311826	2.441955371	-0.552963351	0.580288506	NA	protein_coding	Ezh1	0	1.941967087	0.883078625	4.16179145	0	1.892295334	0.861952893	4.211263468	NA
ENSMUSG00000006930	0.502857851	-0.02547562	4.438514814	-0.005739672	0.995420429	NA	protein_coding	Hap1	0	0.970983543	0	1.040447863	0	1.517218016	0	1.657532079	NA
ENSMUSG00000006932	1.723427595	-0.339097929	2.229470819	-0.152097945	0.879109685	NA	protein_coding	Ctnnb1	2.075673863	0.970983543	1.76615725	2.080895725	2.24494656	1.088696184	1.947519243	2.246777693	NA
ENSMUSG00000006941	1.02242905	-0.025575053	3.025748082	-0.008452473	0.993255983	NA	protein_coding	Eif1b	1.037836931	0.970983543	0	2.080895725	4.661183813	4.288807325	0	9.015077947	NA
ENSMUSG00000006998	3.567616731	-1.33414651	1.658585984	-0.804387908	0.421172983	NA	protein_coding	Psmd2	3.113510794	0.970983543	7.064629	3.121343588	4.16138303	1.270739652	9.26128347	4.242006554	NA
ENSMUSG00000007021	0.242745886	1.495318361	4.995051494	0.299359949	0.764665418	NA	protein_coding	Syngr3	0	0.970983543	0	0	0	1.898648016	0	0	NA
ENSMUSG00000007029	10.30164505	1.086204194	0.963557656	1.127285105	0.259621958	NA	protein_coding	Vars	13.49188011	14.56475315	7.947707625	5.202239313	12.87927126	14.41351438	7.735104717	4.957606338	NA
ENSMUSG00000007030	0.982434008	1.693380639	3.134911595	0.540168546	0.589080802	NA	protein_coding	Vwa7	2.075673863	0.970983543	0.883078625	0	1.90753296	0.877571199	0.781496903	0	NA
ENSMUSG00000007033	4.605181696	0.203660547	1.432780554	0.142143572	0.886966602	NA	protein_coding	Hspa1l	2.075673863	7.767868347	4.415393125	4.16179145	3.360785964	12.31518643	7.012059888	6.851797099	NA
ENSMUSG00000007034	0.242745886	1.495318361	4.995051494	0.299359949	0.764665418	NA	protein_coding	Slc44a4	0	0.970983543	0	0	0	1.638262002	0	0	NA
ENSMUSG00000007035	1.46331563	0.10681853	2.406719681	0.044383453	0.964598751	NA	protein_coding	Msh5	2.075673863	0.970983543	1.76615725	1.040447863	2.819789539	1.36746868	2.446202723	1.411044777	NA
ENSMUSG00000007036	1.186490317	0.726281339	2.817722127	0.257754777	0.796596168	NA	protein_coding	Abhd16a	1.037836931	1.941967087	1.76615725	0	2.389935682	4.398013067	3.916529616	0	NA
ENSMUSG00000007038	3.166072461	-1.663670052	1.751309158	-0.949957947	0.342133621	NA	protein_coding	Neu1	2.075673863	0.970983543	4.415393125	5.202239313	3.421659509	1.567281255	7.139068555	8.719878679	NA
ENSMUSG00000007041	4.814772855	-0.178062435	1.380295704	-0.129003108	0.89735519	NA	protein_coding	Clic1	5.189184657	3.883934174	7.064629	3.121343588	20.35262105	15.25914454	28.77369439	12.50274581	NA
ENSMUSG00000007050	0.983086741	0.06462339	2.878483486	0.022450499	0.982088598	NA	protein_coding	Lsm2	1.037836931	0.970983543	0.883078625	1.040447863	6.774928012	6.571059109	5.877334858	6.78045411	NA
ENSMUSG00000007080	1.485944592	0.022622273	2.395236564	0.009444693	0.992464338	NA	protein_coding	Pole	1.037836931	1.941967087	0.883078625	2.080895725	2.695697688	4.960683146	2.208799993	5.213680849	NA
ENSMUSG00000007097	0.520223931	-2.483189205	4.66840037	-0.531914362	0.59478531	NA	protein_coding	Atp1a2	0	0	0	2.080895725	0	0	0	1.75135296	NA
ENSMUSG00000007122	6.875691569	0.088239265	1.158913431	0.076139652	0.939307994	NA	protein_coding	Casq1	9.340532383	4.854917717	7.064629	6.242687175	25.80542132	13.43563827	20.26813224	17.61381782	NA
ENSMUSG00000007207	1.221875209	-3.722592728	3.020203602	-1.232563502	0.217738661	NA	protein_coding	Stx1a	0	0	1.76615725	3.121343588	0	0	3.267964914	5.655187258	NA
ENSMUSG00000007216	0.260111966	-1.461880636	4.983578111	-0.293339565	0.769262614	NA	protein_coding	Zfp775	0	0	0	1.040447863	0	0	0	0.977644928	NA
ENSMUSG00000007338	2.01012594	1.560980204	2.27483197	0.686195827	0.492589629	NA	protein_coding	Mrpl49	2.075673863	3.883934174	0	2.080895725	13.50460461	24.74298055	0	13.76624571	NA
ENSMUSG00000007411	1.943544519	0.128947321	2.137200954	0.060334673	0.951889087	NA	protein_coding	Mark3	3.113510794	0.970983543	2.649235875	1.040447863	3.530839437	1.10300268	3.119846783	1.205009634	NA
ENSMUSG00000007415	8.310190654	0.42157072	1.04854928	0.402051413	0.687646189	NA	protein_coding	Gatad1	9.340532383	9.709835434	7.947707625	6.242687175	25.22189169	27.18102537	21.88030677	16.8283096	NA
ENSMUSG00000007458	25.21580014	0.02997453	0.652559307	0.045933802	0.963363013	NA	protein_coding	M6pr	19.7189017	31.07147339	16.77849387	33.2943316	40.24948362	62.3730522	32.97961025	65.55411386	NA
ENSMUSG00000007476	1.746709291	-1.350311826	2.441955371	-0.552963351	0.580288506	NA	protein_coding	Lrrc8a	0	1.941967087	0.883078625	4.16179145	0	1.773040601	0.807631582	3.945864567	NA
ENSMUSG00000007564	8.250177581	-0.089461135	1.052287906	-0.085015835	0.932248802	NA	protein_coding	Ppp2r1a	7.26485852	8.738851891	9.713864875	7.283135038	12.51160228	15.07569191	17.37252211	12.80992938	NA
ENSMUSG00000007570	1.684738019	-1.238651091	2.298798884	-0.53882534	0.590007377	NA	protein_coding	Fance	1.037836931	0.970983543	2.649235875	2.080895725	2.264728636	2.196579168	5.894041324	4.53315181	NA
ENSMUSG00000007589	3.480281885	-0.313644403	1.77639105	-0.176562702	0.859851893	NA	protein_coding	Tinf2	6.227021589	0	3.5323145	4.16179145	14.67072419	0	8.013929162	9.458092434	NA
ENSMUSG00000007591	0.502205119	2.509874644	4.327787919	0.579944002	0.561952381	NA	protein_coding	Tssk4	1.037836931	0.970983543	0	0	3.513416814	3.218620848	0	0	NA
ENSMUSG00000007603	0.518918466	2.552600149	4.672415458	0.546312752	0.584850972	NA	protein_coding	Dus3l	2.075673863	0	0	0	3.904665834	0	0	0	NA
ENSMUSG00000007610	0.260111966	-1.461880636	4.983578111	-0.293339565	0.769262614	NA	protein_coding	Gtpbp3	0	0	0	1.040447863	0	0	0	1.438278145	NA
ENSMUSG00000007613	1.746056558	-0.408711369	2.247128584	-0.181881612	0.855675635	NA	protein_coding	Tgfbr1	1.037836931	1.941967087	0.883078625	3.121343588	0.762379335	1.402947495	0.624678159	2.21174794	NA
ENSMUSG00000007617	2.465073916	-1.961260304	2.012253467	-0.974658678	0.329729597	NA	protein_coding	Homer1	1.037836931	0.970983543	2.649235875	5.202239313	3.81362426	3.493639155	9.548252817	19.43755116	NA
ENSMUSG00000007655	0.260111966	-1.461880636	4.983578111	-0.293339565	0.769262614	NA	protein_coding	Cav1	0	0	0	1.040447863	0	0	0	4.075803356	NA
ENSMUSG00000007656	1.021123584	3.531040486	3.262062846	1.082456302	0.279049822	NA	protein_coding	Arpp19	3.113510794	0.970983543	0	0	2.961827265	0.957566978	0	0	NA
ENSMUSG00000007659	2.425078873	-1.134021227	1.936738868	-0.5855313	0.558190527	NA	protein_coding	Bcl2l1	2.075673863	0.970983543	3.5323145	3.121343588	4.687637751	2.156573944	7.68191053	6.79968138	NA
ENSMUSG00000007670	20.27874484	-0.683465683	0.68632525	-0.99583351	0.319331046	NA	protein_coding	Khsrp	15.56755397	15.53573669	22.96004425	27.05164443	19.55469349	19.10820453	28.28771417	34.55148718	NA
ENSMUSG00000007682	0.485491772	2.465880337	4.803085583	0.513395045	0.607675011	NA	protein_coding	Dio2	0	1.941967087	0	0	0	1.281873106	0	0	NA
ENSMUSG00000007721	0.480228889	0.131413897	4.515542493	0.029102571	0.976782785	NA	protein_coding	Ccdc124	1.037836931	0	0.883078625	0	4.353724231	0	3.776910269	0	NA
ENSMUSG00000007739	6.4814094	1.807096525	1.241803475	1.455219414	0.145608528	NA	protein_coding	Cct4	11.41620625	8.738851891	2.649235875	3.121343588	23.33225344	17.56494587	5.213993203	6.153589415	NA
ENSMUSG00000007783	0.260111966	-1.461880636	4.983578111	-0.293339565	0.769262614	NA	protein_coding	Cpt1c	0	0	0	1.040447863	0	0	0	1.734114512	NA
ENSMUSG00000007812	1.690000901	-0.388035849	2.401598257	-0.161574005	0.871641329	NA	protein_coding	Zfp655	0	2.91295063	1.76615725	2.080895725	0	4.722761633	2.968521586	3.439685366	NA
ENSMUSG00000007815	13.89673184	-0.483917855	0.822881669	-0.588077087	0.556480552	NA	protein_coding	Rhoa	13.49188011	9.709835434	16.77849387	15.60671794	37.36475449	27.87722046	47.37488097	43.14834434	NA
ENSMUSG00000007817	22.46972805	-0.923625751	0.658253424	-1.40314614	0.160573265	NA	protein_coding	Zmiz1	14.52971704	16.50672024	31.7908305	27.05164443	10.7029478	11.95816659	22.55085842	19.22170822	NA
ENSMUSG00000007827	1.706061516	0.508862131	2.236383793	0.227537926	0.820005481	NA	protein_coding	Ankrd26	2.075673863	1.941967087	1.76615725	1.040447863	1.415653481	1.296871976	1.181467323	0.721540327	NA
ENSMUSG00000007833	14.38609837	0.660253395	0.814625486	0.810499311	0.417653261	NA	protein_coding	Aldh16a1	18.68106477	16.50672024	8.83078625	13.52582221	23.0248436	20.37947344	11.30262923	17.02555747	NA
ENSMUSG00000007836	15.01594698	-1.447395228	0.815477688	-1.774904758	0.075913615	NA	protein_coding	Hnrnpa0	9.340532383	6.796884804	22.07696562	21.84940511	39.01296957	29.43033655	94.01177629	91.10451289	NA
ENSMUSG00000007837	0.242745886	1.495318361	4.995051494	0.299359949	0.764665418	NA	protein_coding	Prrg2	0	0.970983543	0	0	0	3.406439525	0	0	NA
ENSMUSG00000007850	12.10118797	-0.632251836	0.880403019	-0.718139105	0.472671521	NA	protein_coding	Hnrnph1	8.302695451	10.68081898	15.89541525	13.52582221	14.94575837	18.826119	28.06501173	24.75739612	NA
ENSMUSG00000007872	1.922221022	-1.456278576	2.309261044	-0.630625359	0.528285513	NA	protein_coding	Id3	2.075673863	0	3.5323145	2.080895725	8.354836454	0	14.76465305	8.55404948	NA
ENSMUSG00000007888	0.700998545	-0.805726255	3.846518913	-0.209468944	0.834082177	NA	protein_coding	Crlf1	1.037836931	0	1.76615725	0	4.084875231	0	6.694127772	0	NA
ENSMUSG00000007891	9.786914947	-0.212701305	0.96897183	-0.219512372	0.826250944	NA	protein_coding	Ctsd	10.37836931	7.767868347	10.5969435	10.40447863	24.71256366	18.11122945	24.74935017	25.19135015	NA
ENSMUSG00000007944	7.779399937	-1.521397387	1.121205713	-1.356929749	0.174803533	NA	protein_coding	Ttc9b	4.151347726	3.883934174	10.5969435	12.48537435	17.56850131	17.03983575	45.72268441	52.74849416	NA
ENSMUSG00000007946	0.744951005	3.080623449	3.677026233	0.837802957	0.402141378	NA	protein_coding	Phox2a	1.037836931	1.941967087	0	0	2.885960069	5.310808232	0	0	NA
ENSMUSG00000007950	4.810815437	-1.119474685	1.406129855	-0.796138906	0.425951303	NA	protein_coding	Abhd8	4.151347726	1.941967087	7.947707625	5.202239313	8.335576885	3.818086917	15.65247191	10.62134017	NA
ENSMUSG00000008035	2.749814062	1.455610689	1.848146369	0.78760574	0.430927356	NA	protein_coding	Mid1ip1	4.151347726	3.883934174	0.883078625	2.080895725	8.058565658	7.552271642	1.780135475	4.125357196	NA
ENSMUSG00000008036	2.465073916	-1.961260304	2.012253467	-0.974658678	0.329729597	NA	protein_coding	Ap2s1	1.037836931	0.970983543	2.649235875	5.202239313	5.372431114	5.210765686	13.98195373	26.88406619	NA
ENSMUSG00000008090	0.242745886	1.495318361	4.995051494	0.299359949	0.764665418	NA	protein_coding	Fgfrl1	0	0.970983543	0	0	0	1.544040345	0	0	NA
ENSMUSG00000008140	3.634850886	-0.956506908	1.612758859	-0.593087369	0.553122683	NA	protein_coding	Emc10	1.037836931	3.883934174	4.415393125	5.202239313	2.49325343	9.136220259	10.4040201	12.70779127	NA
ENSMUSG00000008153	0.480228889	0.131413897	4.515542493	0.029102571	0.976782785	NA	protein_coding	Clstn3	1.037836931	0	0.883078625	0	1.036326294	0	0.915697049	0	NA
ENSMUSG00000008167	0.662308969	-2.85341927	4.211512459	-0.677528393	0.498070761	NA	protein_coding	Fbxw9	0	0	2.649235875	0	0	0	5.60411821	0	NA
ENSMUSG00000008193	1.103848281	-3.58999199	3.443516438	-1.04253662	0.297162956	NA	protein_coding	Spib	0	0	4.415393125	0	0	0	6.059959865	0	NA
ENSMUSG00000008200	7.505226576	-0.386956464	1.102868139	-0.350863762	0.725690559	NA	protein_coding	Fnbp4	6.227021589	6.796884804	9.713864875	7.283135038	5.176095799	5.532090039	7.919695678	6.155775017	NA
ENSMUSG00000008206	1.20450913	-1.947515681	2.898419148	-0.671923411	0.501632456	NA	protein_coding	Cers4	0	0.970983543	1.76615725	2.080895725	0	2.306340381	4.34899434	5.039266773	NA
ENSMUSG00000008226	0.242745886	1.495318361	4.995051494	0.299359949	0.764665418	NA	protein_coding	Scrn3	0	0.970983543	0	0	0	2.397631248	0	0	NA
ENSMUSG00000008301	2.390346714	0.112564325	1.929619283	0.058334992	0.953481796	NA	protein_coding	Phax	2.075673863	2.91295063	3.5323145	1.040447863	5.33567036	7.364114903	8.743880074	2.579896338	NA
ENSMUSG00000008307	12.62471659	-0.258671219	0.857592246	-0.301624951	0.762937985	NA	protein_coding	1700109H08Rik	10.37836931	12.62278606	15.01233662	12.48537435	53.16112352	63.31077763	75.42369863	65.02929419	NA
ENSMUSG00000008318	6.461474029	-0.907131954	1.205398357	-0.752557815	0.451715675	NA	protein_coding	Relt	4.151347726	4.854917717	10.5969435	6.242687175	6.347808703	7.436245122	16.82675544	9.748749128	NA
ENSMUSG00000008333	0.502205119	2.509874644	4.327787919	0.579944002	0.561952381	NA	protein_coding	Snrpb2	1.037836931	0.970983543	0	0	4.180123474	4.054336575	0	0	NA
ENSMUSG00000008348	0.740340855	-0.911003344	3.505233419	-0.259898054	0.794942412	NA	protein_coding	Ubc	1.037836931	0	0.883078625	1.040447863	2.487836662	0	2.038482885	2.405831042	NA
ENSMUSG00000008373	7.826087009	-1.551619914	1.136543753	-1.365209135	0.172187328	NA	protein_coding	Prpf31	3.113510794	4.854917717	15.01233662	8.323582901	6.533259791	9.975135926	30.89742936	17.75956417	NA
ENSMUSG00000008393	32.08992916	0.196513888	0.558171647	0.352067126	0.724787921	NA	protein_coding	Carhsp1	40.47564033	28.15852276	32.67390912	27.05164443	208.1868241	145.0796451	174.5201809	142.1005589	NA
ENSMUSG00000008398	40.47726864	-0.208890197	0.491457636	-0.425042123	0.670805968	NA	protein_coding	Elk3	35.28645567	39.81032528	44.15393125	42.65836237	61.20395879	71.58386489	78.08117705	73.8649741	NA
ENSMUSG00000008429	2.849904839	-1.498233295	1.827021778	-0.82004129	0.412192569	NA	protein_coding	Herpud2	1.037836931	1.941967087	5.29847175	3.121343588	1.623352539	2.98732963	7.980852803	4.709527748	NA
ENSMUSG00000008435	0.242745886	1.495318361	4.995051494	0.299359949	0.764665418	NA	protein_coding	Rdh13	0	0.970983543	0	0	0	1.451707257	0	0	NA
ENSMUSG00000008475	4.751372436	-0.120496698	1.398566929	-0.086157263	0.931341404	NA	protein_coding	Arpc5	5.189184657	3.883934174	2.649235875	7.283135038	11.85719187	8.889793811	6.28620291	16.99588126	NA
ENSMUSG00000008496	11.74317438	-1.86739778	0.948735428	-1.968301935	0.049033307	NA	protein_coding	Pou2f2	6.227021589	3.883934174	15.01233662	21.84940511	12.27629483	7.937920403	30.17454506	43.00207876	NA
ENSMUSG00000008601	0.220769656	-1.342306881	4.991527626	-0.268917049	0.787993517	NA	protein_coding	Rab25	0	0	0.883078625	0	0	0	3.244373527	0	NA
ENSMUSG00000008604	5.429742019	-0.184223265	1.307360082	-0.140912414	0.887939135	NA	protein_coding	Ubqln4	7.26485852	2.91295063	5.29847175	6.242687175	8.403951776	3.299490719	6.011758351	7.342947201	NA
ENSMUSG00000008682	10.62595845	0.274398215	0.940134341	0.291871281	0.770385042	NA	protein_coding	Rpl10	14.52971704	8.738851891	8.83078625	10.40447863	68.81086662	42.90443529	42.63877725	49.19070964	NA
ENSMUSG00000008683	17.92555129	0.341000003	0.723458166	0.471347231	0.637392793	NA	protein_coding	Rps15a	18.68106477	21.36163796	15.01233662	16.6471658	134.1815153	150.8978924	103.8375217	115.3409251	NA
ENSMUSG00000008690	41.11337138	0.565732542	0.492806473	1.147981151	0.250976345	NA	protein_coding	Ncaph2	47.74049885	50.49114426	37.08930225	29.13254015	57.61006861	59.66010991	43.89899769	35.74639381	NA
ENSMUSG00000008730	13.29536064	-0.332441493	0.924291013	-0.359671887	0.719092518	NA	protein_coding	Hipk1	19.7189017	3.883934174	15.01233662	14.56627008	18.49269234	3.648601131	14.62011411	13.95109783	NA
ENSMUSG00000008734	1.425278786	-2.248623268	2.731319039	-0.82327375	0.410352338	NA	protein_coding	Gprc5b	0	0.970983543	2.649235875	2.080895725	0	1.348615273	3.618715075	2.783181163	NA
ENSMUSG00000008763	4.75467712	1.157043079	1.412433339	0.819184203	0.412681326	NA	protein_coding	Man1a2	7.26485852	5.82590126	1.76615725	4.16179145	7.355893641	5.801348534	1.722077144	4.064813771	NA
ENSMUSG00000008822	0.242745886	1.495318361	4.995051494	0.299359949	0.764665418	NA	protein_coding	Acyp1	0	0.970983543	0	0	0	5.953161121	0	0	NA
ENSMUSG00000008845	41.46038152	0.125829351	0.528042741	0.238293875	0.811653171	NA	protein_coding	Cd163	29.05943408	57.28802906	32.67390912	46.82015382	24.95311154	49.2763512	29.13558203	41.0594375	NA
ENSMUSG00000008855	3.876291306	0.078091067	1.514824095	0.051551244	0.958886269	NA	protein_coding	Hdac5	3.113510794	4.854917717	4.415393125	3.121343588	3.14127297	5.077911363	4.541822705	3.143835208	NA
ENSMUSG00000008859	0.260111966	-1.461880636	4.983578111	-0.293339565	0.769262614	NA	protein_coding	Rala	0	0	0	1.040447863	0	0	0	2.898170922	NA
ENSMUSG00000008892	1.524634169	0.983055513	2.532567886	0.388165513	0.697893553	NA	protein_coding	Vdac3	2.075673863	1.941967087	0	2.080895725	6.039419832	5.532677622	0	6.156428843	NA
ENSMUSG00000008958	3.015841643	0.958672635	1.909958128	0.501933849	0.615714054	NA	protein_coding	Vps72	2.075673863	5.82590126	0	4.16179145	6.104224332	17.16214607	0	12.49954736	NA
ENSMUSG00000008976	17.42130531	1.175805009	0.757334521	1.552556997	0.120529006	NA	protein_coding	Gabpa	24.90808635	23.30360504	7.947707625	13.52582221	26.5356048	25.73710412	8.6324885	14.38517658	NA
ENSMUSG00000008999	0.965720661	1.666650692	3.151915212	0.528773961	0.596962263	NA	protein_coding	Bmp7	1.037836931	1.941967087	0.883078625	0	2.095286077	3.855792278	1.7168349	0	NA
ENSMUSG00000009013	11.87572551	0.049003988	0.890010101	0.055060035	0.956090635	NA	protein_coding	Dynll1	12.45404318	11.65180252	8.83078625	14.56627008	70.32917467	64.42815066	48.9124062	83.64037166	NA
ENSMUSG00000009030	6.450593637	0.69321925	1.234036716	0.56174929	0.574286846	NA	protein_coding	Pdcl	5.189184657	10.68081898	2.649235875	7.283135038	6.846104583	14.1151684	3.629527382	9.813080691	NA
ENSMUSG00000009035	4.233883117	-0.500780011	1.550109914	-0.323060969	0.746649069	NA	protein_coding	Tmem184b	4.151347726	2.91295063	8.83078625	1.040447863	4.728377058	3.439569219	10.25481572	1.183058462	NA
ENSMUSG00000009073	5.817183873	-1.215201274	1.271901034	-0.955421249	0.339364713	NA	protein_coding	Nf2	3.113510794	3.883934174	7.947707625	8.323582901	5.058973694	6.20642432	12.43566121	13.04591108	NA
ENSMUSG00000009075	20.26706342	0.16169914	0.697174681	0.231934901	0.816588577	NA	protein_coding	Cabp7	15.56755397	27.18753922	18.54465112	19.76850939	86.53785164	147.9834085	101.1111147	111.738309	NA
ENSMUSG00000009076	0.779683164	-1.00613218	3.700049784	-0.271923958	0.78568049	NA	protein_coding	Zmat5	1.037836931	0	0	2.080895725	6.080890141	0	0	12.45176622	NA
ENSMUSG00000009079	37.89410126	-2.072294963	0.543981179	-3.809497538	0.000139249	NA	protein_coding	Ewsr1	15.56755397	13.59376961	66.23089687	56.18418458	25.9352713	23.47784661	112.4958625	93.4431332	NA
ENSMUSG00000009090	5.587615704	0.446254201	1.28657615	0.346854091	0.728700938	NA	protein_coding	Ap1b1	4.151347726	8.738851891	5.29847175	4.16179145	4.349456407	9.004462772	5.3457845	4.20608692	NA
ENSMUSG00000009092	4.290591506	-0.875197684	1.491843335	-0.586655223	0.557435286	NA	protein_coding	Derl3	4.151347726	1.941967087	7.947707625	3.121343588	12.35440255	5.658898404	23.19898688	9.445319537	NA
ENSMUSG00000009112	5.711830214	-0.066564768	1.270958147	-0.05237369	0.958230938	NA	protein_coding	Bcl2l13	7.26485852	3.883934174	4.415393125	7.283135038	4.011284592	2.148153346	2.53169123	4.106929808	NA
ENSMUSG00000009114	3.819582917	0.479826113	1.587118974	0.302325232	0.762404145	NA	protein_coding	2610028H24Rik	3.113510794	5.82590126	5.29847175	1.040447863	7.772990577	15.07817661	13.48633325	2.593110255	NA
ENSMUSG00000009145	0.519571198	0.020044196	4.38467679	0.004571419	0.996352548	NA	protein_coding	Dqx1	1.037836931	0	0	1.040447863	1.306488092	0	0	1.263422819	NA
ENSMUSG00000009207	1.480681709	-0.902426206	2.559346943	-0.352600185	0.724388199	NA	protein_coding	Lnp	2.075673863	0	1.76615725	2.080895725	0.933465832	0	0.779046139	0.951550999	NA
ENSMUSG00000009210	9.584015818	0.100372391	1.018023165	0.09859539	0.921459531	NA	protein_coding	Prr29	7.26485852	12.62278606	13.24617937	5.202239313	29.36531125	51.10928135	55.60106688	21.47535629	NA
ENSMUSG00000009246	3.057265832	0.366636281	1.880741072	0.194942455	0.845437998	NA	protein_coding	Trpm5	2.075673863	4.854917717	5.29847175	0	2.124617425	5.151710341	5.529396634	0	NA
ENSMUSG00000009291	5.586392899	-0.877169711	1.388797728	-0.631603648	0.527645902	NA	protein_coding	Pttg1ip	2.075673863	5.82590126	12.36310075	2.080895725	3.584739485	9.851877406	20.9421079	3.654190995	NA
ENSMUSG00000009292	7.323229158	-1.676017265	1.183077872	-1.41665845	0.156582811	NA	protein_coding	Trpm2	3.113510794	3.883934174	15.01233662	7.283135038	1.969413413	2.460908587	9.860974952	4.704868417	NA
ENSMUSG00000009293	0.988349623	1.548889265	3.370611729	0.459527643	0.645855306	NA	protein_coding	Ube2g2	0	2.91295063	0	1.040447863	0	12.68200029	0	4.362042688	NA
ENSMUSG00000009350	12.50882228	0.04795059	1.924923791	0.024910384	0.980126445	NA	protein_coding	Mpo	2.075673863	23.30360504	1.76615725	22.88985298	3.408839339	37.63813411	2.793133792	36.26122562	NA
ENSMUSG00000009356	0.242745886	1.495318361	4.995051494	0.299359949	0.764665418	NA	protein_coding	Lpo	0	0.970983543	0	0	0	1.265122646	0	0	NA
ENSMUSG00000009394	0.502205119	2.509874644	4.327787919	0.579944002	0.561952381	NA	protein_coding	Syn2	1.037836931	0.970983543	0	0	1.502986452	1.4085586	0	0	NA
ENSMUSG00000009406	0.242745886	1.495318361	4.995051494	0.299359949	0.764665418	NA	protein_coding	Elk1	0	0.970983543	0	0	0	2.355965095	0	0	NA
ENSMUSG00000009418	2.448360569	-1.990823922	2.112523897	-0.942391196	0.345992393	NA	protein_coding	Nav1	0	1.941967087	2.649235875	5.202239313	0	1.321468715	1.765196447	3.472160955	NA
ENSMUSG00000009470	4.327199203	-0.169240026	1.543997181	-0.109611616	0.912717398	NA	protein_coding	Tnpo1	5.189184657	2.91295063	0.883078625	8.323582901	3.75231877	2.06248653	0.626317397	6.120027194	NA
ENSMUSG00000009535	1.039142397	0.009417423	3.228160123	0.002917273	0.997672356	NA	protein_coding	Rnmt	2.075673863	0	0	2.080895725	4.116875934	0	0	4.215038874	NA
ENSMUSG00000009545	1.715934548	4.28632441	2.728245983	1.571091623	0.116161368	NA	protein_coding	Kcnq1	1.037836931	5.82590126	0	0	1.40566608	8.180203436	0	0	NA
ENSMUSG00000009549	2.425731606	-1.93654471	2.013122563	-0.961960661	0.336069365	NA	protein_coding	Srp14	1.037836931	0.970983543	3.5323145	4.16179145	6.145548897	5.654588229	20.14215231	23.77190197	NA
ENSMUSG00000009555	0.943744431	0.158748904	3.113803536	0.050982312	0.959339615	NA	protein_coding	Cdk9	1.037836931	0.970983543	1.76615725	0	2.709061412	2.538859711	4.787448811	0	NA
ENSMUSG00000009563	1.16516682	-1.896582323	2.952304134	-0.642407502	0.52060863	NA	protein_coding	Tor2a	0	0.970983543	2.649235875	1.040447863	0	2.617738995	7.024131903	2.701156515	NA
ENSMUSG00000009566	0.999800088	0.101442227	3.049810545	0.033261813	0.973465806	NA	protein_coding	Fpgs	2.075673863	0	0.883078625	1.040447863	3.695578397	0	1.514040979	1.786881222	NA
ENSMUSG00000009569	2.689800989	-0.205905471	1.797379633	-0.114558698	0.908794918	NA	protein_coding	Mkl2	2.075673863	2.91295063	2.649235875	3.121343588	2.487146257	3.417690478	3.113560701	3.80299914	NA
ENSMUSG00000009575	3.374086187	-0.339177917	1.625485665	-0.208662509	0.83471171	NA	protein_coding	Cbx5	2.075673863	3.883934174	4.415393125	3.121343588	5.771991513	10.81871134	12.75031722	8.864428634	NA
ENSMUSG00000009588	0.485491772	2.465880337	4.803085583	0.513395045	0.607675011	NA	protein_coding	St6galnac1	0	1.941967087	0	0	0	3.166569408	0	0	NA
ENSMUSG00000009614	0.220769656	-1.342306881	4.991527626	-0.268917049	0.787993517	NA	protein_coding	Sardh	0	0	0.883078625	0	0	0	0.942742247	0	NA
ENSMUSG00000009621	6.790819368	0.499921144	1.170247182	0.427192778	0.669238921	NA	protein_coding	Vav2	6.227021589	9.709835434	7.064629	4.16179145	7.366907352	11.50678004	8.679190928	5.028376107	NA
ENSMUSG00000009630	9.325209318	-0.133651077	1.037215996	-0.128855588	0.897471919	NA	protein_coding	Ppp2cb	5.189184657	12.62278606	13.24617937	6.242687175	10.89026154	27.46264397	28.34231462	13.07897326	NA
ENSMUSG00000009633	0.944397164	-1.499740552	3.180931672	-0.471478393	0.637299146	NA	protein_coding	G0s2	0	0.970983543	1.76615725	1.040447863	0	4.973669227	8.858328766	5.227329228	NA
ENSMUSG00000009640	2.926631259	0.10735666	1.743052326	0.061591186	0.950888396	NA	protein_coding	Dmap1	4.151347726	1.941967087	3.5323145	2.080895725	10.66713024	4.886048195	8.902507551	5.436898749	NA
ENSMUSG00000009647	2.148906294	-1.759673499	2.206788583	-0.797391065	0.425223947	NA	protein_coding	Mcu	0	1.941967087	3.5323145	3.121343588	0	6.401109584	12.0703733	10.48963732	NA
ENSMUSG00000009681	2.3742861	-0.525174635	2.078162785	-0.252711019	0.800491532	NA	protein_coding	Bcr	0	3.883934174	3.5323145	2.080895725	0	3.369333121	3.013623629	1.738350563	NA
ENSMUSG00000009733	1.684085286	-0.291823204	2.27007301	-0.128552343	0.897711878	NA	protein_coding	Tfcp2	2.075673863	0.970983543	2.649235875	1.040447863	2.487146257	1.139230159	3.113560701	1.26766638	NA
ENSMUSG00000009739	11.60159379	-1.380124228	0.95309488	-1.44804495	0.14760448	NA	protein_coding	Pou6f1	3.113510794	9.709835434	15.89541525	17.68761366	2.401027663	7.500595804	12.72927625	13.93024117	NA
ENSMUSG00000009741	5.031585094	-1.214239995	1.38467253	-0.876914916	0.380532854	NA	protein_coding	Ubp1	4.151347726	1.941967087	8.83078625	5.202239313	7.132780073	3.459071402	15.46944	8.923247575	NA
ENSMUSG00000009772	2.404408109	-4.701735665	2.380154414	-1.975391024	0.048223791	NA	protein_coding	Nuak2	0	0	4.415393125	5.202239313	0	0	5.803261171	6.849047385	NA
ENSMUSG00000009828	1.1917532	2.052818759	3.151901915	0.651295254	0.514855911	NA	protein_coding	Ick	0	3.883934174	0.883078625	0	0	5.827291622	1.32718471	0	NA
ENSMUSG00000009863	3.268079795	2.537654925	1.835058097	1.382874433	0.166703371	NA	protein_coding	Sdhb	7.26485852	3.883934174	0.883078625	1.040447863	28.96806979	15.51319898	3.656594617	4.236969358	NA
ENSMUSG00000009876	0.260111966	-1.461880636	4.983578111	-0.293339565	0.769262614	NA	protein_coding	Cox4i2	0	0	0	1.040447863	0	0	0	5.428055843	NA
ENSMUSG00000009894	1.186490317	0.726281339	2.817722127	0.257754777	0.796596168	NA	protein_coding	Snap47	1.037836931	1.941967087	1.76615725	0	3.43292507	6.317345453	5.625738302	0	NA
ENSMUSG00000009905	0.740340855	-0.911003344	3.505233419	-0.259898054	0.794942412	NA	protein_coding	Kdsr	1.037836931	0	0.883078625	1.040447863	1.944236399	0	1.622608784	1.98190445	NA
ENSMUSG00000009907	1.994065326	0.668748115	2.472509549	0.270473421	0.786796062	NA	protein_coding	Vps4b	0	4.854917717	0	3.121343588	0	5.056364204	0	3.314389542	NA
ENSMUSG00000009927	10.49505191	0.43629776	0.980178849	0.445120561	0.656232631	NA	protein_coding	Rps25	11.41620625	12.62278606	4.415393125	13.52582221	92.83947962	106.4177454	36.60882305	109.8088797	NA
ENSMUSG00000009995	0.927031084	0.12304525	3.369836122	0.036513719	0.97087274	NA	protein_coding	Taz	0	1.941967087	1.76615725	0	0	4.290017826	3.820357424	0	NA
ENSMUSG00000010021	0.441539312	-2.269171085	4.900751531	-0.463025124	0.643346359	NA	protein_coding	Kif19a	0	0	1.76615725	0	0	0	2.185447937	0	NA
ENSMUSG00000010025	0.982434008	1.693380639	3.134911595	0.540168546	0.589080802	NA	protein_coding	Aldh3a2	2.075673863	0.970983543	0.883078625	0	4.445949863	2.083312496	1.964218797	0	NA
ENSMUSG00000010044	2.026839287	1.575097636	2.258553389	0.697392253	0.485557348	NA	protein_coding	Zmynd10	3.113510794	2.91295063	0	2.080895725	6.763425587	6.559902812	0	4.512628202	NA
ENSMUSG00000010045	1.542000248	-0.014381771	2.536006935	-0.00567103	0.995475197	NA	protein_coding	Tmem115	2.075673863	0.970983543	0	3.121343588	3.790554253	1.743865668	0	5.498411469	NA
ENSMUSG00000010047	0.441539312	-2.269171085	4.900751531	-0.463025124	0.643346359	NA	protein_coding	Hyal2	0	0	1.76615725	0	0	0	3.600244025	0	NA
ENSMUSG00000010048	1.441992133	-2.220433212	2.720606092	-0.816153878	0.414412132	NA	protein_coding	Ifrd2	1.037836931	0	2.649235875	2.080895725	1.996436823	0	5.292149739	4.088079872	NA
ENSMUSG00000010051	0.260111966	-1.461880636	4.983578111	-0.293339565	0.769262614	NA	protein_coding	Hyal1	0	0	0	1.040447863	0	0	0	1.863040662	NA
ENSMUSG00000010054	0.988349623	1.548889265	3.370611729	0.459527643	0.645855306	NA	protein_coding	Tusc2	0	2.91295063	0	1.040447863	0	19.0948909	0	6.689580453	NA
ENSMUSG00000010057	1.982886828	0.082794275	2.099717584	0.039431148	0.968546646	NA	protein_coding	Nprl2	3.113510794	0.970983543	1.76615725	2.080895725	8.544550849	2.609204559	4.75403892	5.80672987	NA
ENSMUSG00000010066	0.883078625	-3.268248903	3.751215734	-0.871250585	0.383617345	NA	protein_coding	Cacna2d2	0	0	3.5323145	0	0	0	2.590480963	0	NA
ENSMUSG00000010067	5.212277047	1.088270424	1.344521422	0.809410997	0.418278779	NA	protein_coding	Rassf1	9.340532383	4.854917717	3.5323145	3.121343588	21.74881349	11.71908631	8.385496867	7.255517774	NA
ENSMUSG00000010095	15.40646257	-0.28491662	0.805443867	-0.353738643	0.72353476	NA	protein_coding	Slc3a2	9.340532383	18.44868732	20.31080837	13.52582221	19.83366047	38.52603122	41.53109741	27.70428703	NA
ENSMUSG00000010097	16.02158002	-0.627208255	0.778404263	-0.805761588	0.42038033	NA	protein_coding	Nxf1	13.49188011	11.65180252	15.01233662	23.93030084	22.91650516	19.37877969	25.01028895	41.33010553	NA
ENSMUSG00000010110	12.01393579	-1.276771041	0.901474084	-1.416314749	0.156683371	NA	protein_coding	Stx5a	7.26485852	6.796884804	19.42772975	14.56627008	15.43143851	14.46193037	42.85350521	31.59877258	NA
ENSMUSG00000010136	4.477199075	1.873589519	1.487344157	1.259687955	0.207781952	NA	protein_coding	Pifo	7.26485852	6.796884804	1.76615725	2.080895725	31.58052514	30.63021437	7.827571679	9.030366969	NA
ENSMUSG00000010142	0.723627508	-0.948687464	3.532958224	-0.26852496	0.788295265	NA	protein_coding	Tnfrsf13b	0	0.970983543	0.883078625	1.040447863	0	1.755142397	1.562993805	1.844655672	NA
ENSMUSG00000010205	7.427277351	-2.32781059	1.275342713	-1.825243181	0.06796434	NA	protein_coding	Raver1	1.037836931	3.883934174	18.54465112	6.242687175	1.797128246	6.585355222	31.49655962	10.99167716	NA
ENSMUSG00000010277	13.32693794	0.263805605	0.840314799	0.313936641	0.753569161	NA	protein_coding	2610507B11Rik	13.49188011	15.53573669	9.713864875	14.56627008	6.91357689	7.974423226	5.169010657	7.62291866	NA
ENSMUSG00000010290	0.762317084	1.004601827	3.464905407	0.289936292	0.771864976	NA	protein_coding	AI597479	1.037836931	0.970983543	0	1.040447863	1.151346148	1.116700219	0	1.152285265	NA
ENSMUSG00000010307	0.502205119	2.509874644	4.327787919	0.579944002	0.561952381	NA	protein_coding	Tmem86a	1.037836931	0.970983543	0	0	2.388553417	2.197734696	0	0	NA
ENSMUSG00000010358	3.912328931	-1.55322639	1.589227749	-0.977346633	0.328397574	NA	protein_coding	Ifi35	1.037836931	2.91295063	4.415393125	7.283135038	3.835231196	10.54029943	16.00391761	27.3667505	NA
ENSMUSG00000010362	0.988349623	1.548889265	3.370611729	0.459527643	0.645855306	NA	protein_coding	Rdm1	0	2.91295063	0	1.040447863	0	10.2204188	0	3.72187162	NA
ENSMUSG00000010376	3.091345259	-0.089844466	1.734083474	-0.051810923	0.958679352	NA	protein_coding	Nedd8	3.113510794	2.91295063	5.29847175	1.040447863	23.25092026	22.55126122	40.34092875	7.756628437	NA
ENSMUSG00000010392	1.768032787	0.370846682	2.392712825	0.154990051	0.876829161	NA	protein_coding	Gosr1	1.037836931	2.91295063	0	3.121343588	0.966263186	2.667208673	0	2.803237855	NA
ENSMUSG00000010406	0.700998545	-0.805726255	3.846518913	-0.209468944	0.834082177	NA	protein_coding	Mrpl52	1.037836931	0	1.76615725	0	9.6933409	0	16.17961695	0	NA
ENSMUSG00000010453	7.062381798	0.19270786	1.137136274	0.169467692	0.865428783	NA	protein_coding	Kansl3	8.302695451	6.796884804	7.947707625	5.202239313	6.735517565	5.523303141	6.69543492	4.310074683	NA
ENSMUSG00000010517	1.693958318	2.648513375	2.617593317	1.011812399	0.31162776	NA	protein_coding	Faf1	1.037836931	4.854917717	0.883078625	0	1.677420333	7.717065982	1.374444187	0	NA
ENSMUSG00000010538	0.485491772	2.465880337	4.803085583	0.513395045	0.607675011	NA	protein_coding	Tsacc	0	1.941967087	0	0	0	15.84973674	0	0	NA
ENSMUSG00000010554	1.689348169	0.490044566	2.268395062	0.216031402	0.82896327	NA	protein_coding	Mettl16	1.037836931	2.91295063	1.76615725	1.040447863	1.457808707	4.098657685	2.576237117	1.492568751	NA
ENSMUSG00000010607	1.485944592	0.022622273	2.395236564	0.009444693	0.992464338	NA	protein_coding	Pigyl	1.037836931	1.941967087	0.883078625	2.080895725	6.119289817	11.87030033	5.308560517	12.24856226	NA
ENSMUSG00000010608	18.55192989	-0.464307832	0.733483028	-0.633017827	0.526722002	NA	protein_coding	Rbm25	15.56755397	15.53573669	15.01233662	28.09209229	16.30831457	16.00582668	15.14439568	28.38734956	NA
ENSMUSG00000010609	5.354362084	0.95016963	1.384218162	0.686430547	0.492441647	NA	protein_coding	Psen2	9.340532383	4.854917717	6.181550375	1.040447863	18.75504799	9.545217292	12.17414482	2.124268033	NA
ENSMUSG00000010660	0.260111966	-1.461880636	4.983578111	-0.293339565	0.769262614	NA	protein_coding	Plcd1	0	0	0	1.040447863	0	0	0	1.525562965	NA
ENSMUSG00000010663	1.039142397	0.009417423	3.228160123	0.002917273	0.997672356	NA	protein_coding	Fads1	2.075673863	0	0	2.080895725	2.331669693	0	0	2.333571564	NA
ENSMUSG00000010721	1.800806749	1.331819669	2.41149108	0.552280571	0.58075614	NA	protein_coding	Lmbr1	4.151347726	0.970983543	0	2.080895725	6.4214715	1.477116925	0	3.104901481	NA
ENSMUSG00000010751	12.01315937	-1.429863512	0.920686302	-1.55304093	0.120413357	NA	protein_coding	Tnfrsf22	5.189184657	7.767868347	13.24617937	21.84940511	8.581258899	12.57798673	21.48508187	36.73955898	NA
ENSMUSG00000010755	1.248461589	0.51854334	2.986766809	0.173613601	0.862169142	NA	protein_coding	Cars	0	2.91295063	0	2.080895725	0	4.283960983	0	3.120097741	NA
ENSMUSG00000010830	5.169630053	-0.04999525	1.336271172	-0.037414	0.97015491	NA	protein_coding	Kdelr3	7.26485852	2.91295063	5.29847175	5.202239313	19.91828835	8.279534477	14.81088384	14.23895363	NA
ENSMUSG00000010914	0.502857851	-0.02547562	4.438514814	-0.005739672	0.995420429	NA	protein_coding	Pdhx	0	0.970983543	0	1.040447863	0	1.56309473	0	1.642813464	NA
ENSMUSG00000010936	3.152663798	0.31158504	1.672218122	0.186330381	0.852185684	NA	protein_coding	Vac14	3.113510794	3.883934174	3.5323145	2.080895725	4.464833093	5.453610407	4.96831037	3.034223816	NA
ENSMUSG00000011008	0.220769656	-1.342306881	4.991527626	-0.268917049	0.787993517	NA	protein_coding	Mcoln2	0	0	0.883078625	0	0	0	1.455067258	0	NA
ENSMUSG00000011096	2.356267287	0.715907379	2.127072806	0.336569288	0.736441612	NA	protein_coding	Akt1s1	1.037836931	4.854917717	3.5323145	0	2.398348989	11.63089331	8.322391081	0	NA
ENSMUSG00000011114	15.25846192	-0.246613829	0.789032327	-0.31255225	0.754620861	NA	protein_coding	Tbrg1	11.41620625	16.50672024	18.54465112	14.56627008	28.86143421	41.04067085	45.147086	35.52192721	NA
ENSMUSG00000011118	0.983086741	0.06462339	2.878483486	0.022450499	0.982088598	NA	protein_coding	Panx3	1.037836931	0.970983543	0.883078625	1.040447863	1.610432132	1.475307574	1.344024485	1.641632989	NA
ENSMUSG00000011148	1.363307514	-2.129696443	3.012770993	-0.706889587	0.479635096	NA	protein_coding	Adssl1	1.037836931	0	4.415393125	0	2.179721651	0	9.63000117	0	NA
ENSMUSG00000011158	4.491913203	-0.294969578	1.435281059	-0.205513461	0.837170982	NA	protein_coding	Brf1	4.151347726	3.883934174	2.649235875	7.283135038	5.74635077	5.573433474	3.738773418	10.06431631	NA
ENSMUSG00000011171	0.485491772	2.465880337	4.803085583	0.513395045	0.607675011	NA	protein_coding	Vipr2	0	1.941967087	0	0	0	5.196421593	0	0	NA
ENSMUSG00000011179	5.334344053	-0.160048658	1.308427302	-0.122321399	0.902644485	NA	protein_coding	Odc1	6.227021589	3.883934174	7.064629	4.16179145	11.93391725	7.288395104	13.27964642	8.110085009	NA
ENSMUSG00000011254	0.242745886	1.495318361	4.995051494	0.299359949	0.764665418	NA	protein_coding	Thg1l	0	0.970983543	0	0	0	1.687209622	0	0	NA
ENSMUSG00000011256	6.326651093	0.772889334	1.215086709	0.636077515	0.5247259	NA	protein_coding	Adam19	7.26485852	8.738851891	6.181550375	3.121343588	7.148321891	8.914136069	6.201258722	3.066065381	NA
ENSMUSG00000011257	2.304970066	-0.352292058	2.140823899	-0.164559102	0.869291024	NA	protein_coding	Pabpc4	2.075673863	1.941967087	0	5.202239313	2.786645654	2.564023812	0	6.736976266	NA
ENSMUSG00000011267	6.500816339	-0.918163659	1.195432446	-0.768059845	0.442451632	NA	protein_coding	Zfp296	4.151347726	4.854917717	9.713864875	7.283135038	10.85239769	12.42727355	24.90709903	19.35964514	NA
ENSMUSG00000011305	0.762317084	1.004601827	3.464905407	0.289936292	0.771864976	NA	protein_coding	Plin5	1.037836931	0.970983543	0	1.040447863	2.015151838	1.888546266	0	2.063201192	NA
ENSMUSG00000011306	5.147653824	-0.31482271	1.362705166	-0.231027751	0.817293243	NA	protein_coding	Sugp1	7.26485852	1.941967087	6.181550375	5.202239313	11.40049211	3.159266358	9.890069613	8.149850811	NA
ENSMUSG00000011350	0.441539312	-2.269171085	4.900751531	-0.463025124	0.643346359	NA	processed_transcript	Gm5893	0	0	1.76615725	0	0	0	3.609473695	0	NA
ENSMUSG00000011382	0.260111966	-1.461880636	4.983578111	-0.293339565	0.769262614	NA	protein_coding	Dhdh	0	0	0	1.040447863	0	0	0	1.508268997	NA
ENSMUSG00000011427	2.58914014	-0.672892667	1.895272231	-0.355037475	0.722561517	NA	protein_coding	Zfp790	2.075673863	1.941967087	5.29847175	1.040447863	3.135121917	2.938152192	8.310573339	1.60493794	NA
ENSMUSG00000011463	0.983739473	-1.565762947	3.140387558	-0.498589081	0.618068899	NA	protein_coding	Cpb1	0	0.970983543	0.883078625	2.080895725	0	2.567297512	2.296261061	5.298215305	NA
ENSMUSG00000011751	0.762317084	1.004601827	3.464905407	0.289936292	0.771864976	NA	protein_coding	Sptbn4	1.037836931	0.970983543	0	1.040447863	0.842811753	0.772094978	0	0.859140568	NA
ENSMUSG00000011752	2.148253561	-0.91476061	2.037330666	-0.448999578	0.653431961	NA	protein_coding	Pgam1	1.037836931	1.941967087	3.5323145	2.080895725	2.374269942	4.450204245	8.391611766	4.861764242	NA
ENSMUSG00000011831	0.220769656	-1.342306881	4.991527626	-0.268917049	0.787993517	NA	protein_coding	Evi5	0	0	0.883078625	0	0	0	0.589035776	0	NA
ENSMUSG00000011832	1.668024672	-1.271157094	2.436977442	-0.521612171	0.601940388	NA	protein_coding	Evi5l	0	1.941967087	2.649235875	2.080895725	0	1.930835005	2.57917804	2.029308704	NA
ENSMUSG00000011877	5.715870292	-1.170599138	1.299089387	-0.901092065	0.367539371	NA	protein_coding	Git1	4.151347726	2.91295063	10.5969435	5.202239313	4.44366503	3.053111899	11.1256994	5.662196932	NA
ENSMUSG00000011884	6.748825107	-0.56321717	1.185785341	-0.474973969	0.634805527	NA	protein_coding	Gltp	3.113510794	7.767868347	8.83078625	7.283135038	12.57187193	31.41872333	37.02831851	30.03381756	NA
ENSMUSG00000011958	0.982434008	1.693380639	3.134911595	0.540168546	0.589080802	NA	protein_coding	Bnip2	2.075673863	0.970983543	0.883078625	0	3.400476032	1.649075013	1.474977762	0	NA
ENSMUSG00000011960	14.59764772	0.210871401	0.808000743	0.260979217	0.794108535	NA	protein_coding	Ccnt1	18.68106477	12.62278606	11.48002212	15.60671794	25.76657174	17.12252436	15.24799329	20.76436498	NA
ENSMUSG00000012076	2.867270919	-2.23841179	1.903241961	-1.176104687	0.239553045	NA	protein_coding	Brms1l	1.037836931	0.970983543	5.29847175	4.16179145	1.607245681	1.472388485	8.048190938	6.553539212	NA
ENSMUSG00000012114	2.70520887	0.931636238	1.852113165	0.503012589	0.614955421	NA	protein_coding	Med15	5.189184657	1.941967087	2.649235875	1.040447863	6.127738293	2.297100804	3.248678669	1.254769662	NA
ENSMUSG00000012117	5.224190939	-1.027021432	1.395791068	-0.735798828	0.461853134	NA	protein_coding	Dhdds	1.037836931	5.82590126	8.83078625	5.202239313	2.671802596	15.54842155	23.17822197	13.36990951	NA
ENSMUSG00000012123	7.5606295	-0.194083942	1.09930213	-0.176551956	0.859860334	NA	protein_coding	Aim1l	8.302695451	5.82590126	8.83078625	7.283135038	6.914707172	4.771724516	7.082213455	5.850932757	NA
ENSMUSG00000012187	0.220769656	-1.342306881	4.991527626	-0.268917049	0.787993517	NA	protein_coding	Mogat1	0	0	0.883078625	0	0	0	2.936888781	0	NA
ENSMUSG00000012296	1.662109056	-1.164201006	2.473132126	-0.47073951	0.637826766	NA	protein_coding	Tjap1	2.075673863	0	3.5323145	1.040447863	3.289560422	0	5.707469688	1.646121807	NA
ENSMUSG00000012405	5.228296641	-1.280247775	1.37827815	-0.928874752	0.352953999	NA	protein_coding	Rpl15	4.151347726	1.941967087	4.415393125	10.40447863	19.84292545	9.128848744	20.32361314	47.97212649	NA
ENSMUSG00000012422	3.919591032	1.208221431	1.540162919	0.78447638	0.432760636	NA	protein_coding	Tmem167	4.151347726	6.796884804	2.649235875	2.080895725	34.49265254	55.29740956	21.58999841	17.58046028	NA
ENSMUSG00000012429	1.00506297	1.583873276	3.109671499	0.509337812	0.610515459	NA	protein_coding	Mplkip	1.037836931	1.941967087	0	1.040447863	2.541151535	4.762998153	0	2.601742845	NA
ENSMUSG00000012443	0.762317084	1.004601827	3.464905407	0.289936292	0.771864976	NA	protein_coding	Kif11	1.037836931	0.970983543	0	1.040447863	0.822899746	0.798137318	0	0.82357096	NA
ENSMUSG00000012519	0.700998545	-0.805726255	3.846518913	-0.209468944	0.834082177	NA	protein_coding	Mlkl	1.037836931	0	1.76615725	0	2.064904429	0	3.383881589	0	NA
ENSMUSG00000012535	9.694780645	-1.000107748	1.002687521	-0.997427142	0.318557222	NA	protein_coding	Tnpo3	4.151347726	8.738851891	12.36310075	13.52582221	4.058465988	8.365358807	11.85481302	13.44556062	NA
ENSMUSG00000012609	6.787514684	-0.351104354	1.166124939	-0.301086395	0.763348615	NA	protein_coding	Ttll5	4.151347726	7.767868347	7.947707625	7.283135038	3.625252646	6.794979134	7.207357986	6.495463279	NA
ENSMUSG00000012640	0.259459233	1.543782485	4.991667435	0.309271903	0.757114702	NA	protein_coding	Zfp715	1.037836931	0	0	0	1.187379336	0	0	0	NA
ENSMUSG00000012777	11.26536649	0.3127603	0.907795398	0.344527302	0.730449767	NA	protein_coding	Acpt	10.37836931	14.56475315	9.713864875	10.40447863	28.13221293	38.82714533	25.35606095	27.20490143	NA
ENSMUSG00000012848	18.41788337	0.185982316	0.712746177	0.260937655	0.794140586	NA	protein_coding	Rps5	20.75673863	18.44868732	16.77849387	17.68761366	103.5651602	92.20556647	86.93458478	90.12938593	NA
ENSMUSG00000012889	3.20541477	-1.683420227	1.751403704	-0.961183434	0.336459944	NA	protein_coding	Podnl1	2.075673863	0.970983543	3.5323145	6.242687175	3.728271101	1.808040597	6.468643699	11.19393641	NA
ENSMUSG00000013033	11.15874901	-0.991693125	0.933850206	-1.061940255	0.288262809	NA	protein_coding	Adgrl1	5.189184657	9.709835434	14.129258	15.60671794	4.369243397	8.040379369	11.45622205	12.67566504	NA
ENSMUSG00000013089	0.778377699	3.13770086	3.95221862	0.793908729	0.427248568	NA	protein_coding	Etv5	3.113510794	0	0	0	3.115052924	0	0	0	NA
ENSMUSG00000013091	0.722974775	1.096901471	3.528512374	0.310867968	0.755900997	NA	protein_coding	Tmem190	1.037836931	0.970983543	0.883078625	0	6.880453551	6.448176566	6.079563022	0	NA
ENSMUSG00000013150	0.242745886	1.495318361	4.995051494	0.299359949	0.764665418	NA	protein_coding	Gfod2	0	0.970983543	0	0	0	1.894940047	0	0	NA
ENSMUSG00000013155	0.220769656	-1.342306881	4.991527626	-0.268917049	0.787993517	NA	protein_coding	Enkd1	0	0	0.883078625	0	0	0	2.200183088	0	NA
ENSMUSG00000013158	0.502205119	2.509874644	4.327787919	0.579944002	0.561952381	NA	protein_coding	4933405L10Rik	1.037836931	0.970983543	0	0	3.340057432	3.059807319	0	0	NA
ENSMUSG00000013160	1.485944592	0.022622273	2.395236564	0.009444693	0.992464338	NA	protein_coding	Atp6v0d1	1.037836931	1.941967087	0.883078625	2.080895725	2.494919794	4.676343858	2.204509051	5.108817506	NA
ENSMUSG00000013236	2.905960495	-1.500310252	1.807072587	-0.83024349	0.406401131	NA	protein_coding	Ptprs	2.075673863	0.970983543	4.415393125	4.16179145	1.413396371	0.685432456	3.065347611	2.829098468	NA
ENSMUSG00000013275	3.681537957	-1.024322411	1.81824654	-0.563357272	0.573191626	NA	protein_coding	Slc41a1	0	4.854917717	8.83078625	1.040447863	0	4.094701821	7.292848251	0.860706795	NA
ENSMUSG00000013338	0.520223931	-2.483189205	4.66840037	-0.531914362	0.59478531	NA	protein_coding	Fer1l4	0	0	0	2.080895725	0	0	0	1.744894488	NA
ENSMUSG00000013353	0.260111966	-1.461880636	4.983578111	-0.293339565	0.769262614	NA	protein_coding	4931406B18Rik	0	0	0	1.040447863	0	0	0	1.023561476	NA
ENSMUSG00000013367	1.368570397	-0.868380505	2.876184949	-0.301920955	0.762712321	NA	protein_coding	Iglon5	0	1.941967087	3.5323145	0	0	2.989965375	5.348613498	0	NA
ENSMUSG00000013418	1.282541016	-0.614973695	2.76946318	-0.222055198	0.824270914	NA	protein_coding	B4galnt2	1.037836931	0.970983543	0	3.121343588	1.013077115	0.932143577	0	2.939050311	NA
ENSMUSG00000013465	3.829034162	-2.7296743	1.73508761	-1.573219868	0.115667916	NA	protein_coding	Nelfb	1.037836931	0.970983543	7.064629	6.242687175	1.471028554	1.347600761	9.82145527	8.997171453	NA
ENSMUSG00000013495	37.56004699	0.124640057	0.508211055	0.24525255	0.80626089	NA	protein_coding	Tmem175	40.47564033	37.86835819	34.44006637	37.45612305	85.27038922	82.70446075	73.97313005	78.77533073	NA
ENSMUSG00000013523	0.220769656	-1.342306881	4.991527626	-0.268917049	0.787993517	NA	protein_coding	Bcas1	0	0	0.883078625	0	0	0	1.212860784	0	NA
ENSMUSG00000013562	0.943744431	0.158748904	3.113803536	0.050982312	0.959339615	NA	lincRNA	4833413E03Rik	1.037836931	0.970983543	1.76615725	0	12.81233387	11.73730505	21.38567666	0	NA
ENSMUSG00000013593	6.427542888	-1.673190001	1.299446242	-1.287617715	0.19787907	NA	protein_coding	Ndufs2	5.189184657	0.970983543	7.064629	12.48537435	12.54147636	2.350707067	17.73062089	30.81723786	NA
ENSMUSG00000013622	1.26386947	3.840312521	2.983753179	1.287074463	0.198068335	NA	protein_coding	Atraid	3.113510794	1.941967087	0	0	12.48795508	8.074781099	0	0	NA
ENSMUSG00000013629	7.656027466	-0.211003158	1.104599048	-0.191022397	0.848508046	NA	protein_coding	Cad	9.340532383	4.854917717	7.064629	9.364030763	5.342572909	2.73097836	3.891196307	5.166467698	NA
ENSMUSG00000013646	0.961110511	-1.465750497	3.161961056	-0.463557416	0.64296487	NA	protein_coding	Sh3bp5l	1.037836931	0	1.76615725	1.040447863	1.336022973	0	2.230019572	1.361907367	NA
ENSMUSG00000013662	1.023081783	-1.632780668	3.340809684	-0.488738007	0.625027192	NA	protein_coding	Atad1	0	0.970983543	0	3.121343588	0	1.307735458	0	4.286029003	NA
ENSMUSG00000013663	4.273878159	-0.886705141	1.481589444	-0.598482356	0.549518128	NA	protein_coding	Pten	3.113510794	2.91295063	7.947707625	3.121343588	5.682821214	5.511815629	14.78975562	5.687456514	NA
ENSMUSG00000013698	32.21031209	-0.394382041	0.57943978	-0.680626451	0.496107886	NA	protein_coding	Pea15a	20.75673863	34.95540756	45.03700987	28.09209229	40.03692544	66.30916065	83.65388319	52.26822459	NA
ENSMUSG00000013701	2.809909797	-0.861032835	1.84458076	-0.466790532	0.64064975	NA	protein_coding	Timm23	2.075673863	1.941967087	6.181550375	1.040447863	7.521314513	6.890232779	21.96982245	3.833517034	NA
ENSMUSG00000013707	4.470589706	-0.968287179	1.451783519	-0.666963887	0.504795201	NA	protein_coding	Tnfaip8l2	3.113510794	2.91295063	3.5323145	8.323582901	10.66193607	9.992080577	12.56117043	29.10975909	NA
ENSMUSG00000013766	0.220769656	-1.342306881	4.991527626	-0.268917049	0.787993517	NA	protein_coding	Ly6g6e	0	0	0.883078625	0	0	0	2.968317183	0	NA
ENSMUSG00000013787	11.15340346	-0.15359265	0.925817602	-0.16589947	0.868236064	NA	protein_coding	Ehmt2	10.37836931	10.68081898	7.947707625	15.60671794	10.30578492	10.38517704	7.740844392	15.7581771	NA
ENSMUSG00000013833	3.204109305	-0.593157228	1.70353404	-0.348192178	0.727695861	NA	protein_coding	Med16	4.151347726	0.970983543	3.5323145	4.16179145	4.996108232	1.170554666	4.414557069	5.115235619	NA
ENSMUSG00000013846	7.196469341	0.366794668	1.136292727	0.32279945	0.746847129	NA	protein_coding	St3gal1	10.37836931	5.82590126	5.29847175	7.283135038	12.77632351	7.435117555	6.650172347	8.950721333	NA
ENSMUSG00000013858	3.607611773	-1.910516808	1.671088941	-1.143276555	0.252923786	NA	protein_coding	Tmem259	2.075673863	0.970983543	6.181550375	5.202239313	3.639399743	1.674326191	10.43717608	8.798588963	NA
ENSMUSG00000013878	2.266280489	-1.011105771	2.051878967	-0.492770669	0.622174638	NA	protein_coding	Rnf170	1.037836931	1.941967087	0.883078625	5.202239313	4.861172755	8.906584561	4.057007481	24.77677078	NA
ENSMUSG00000013921	0.739688122	1.138058195	3.766402882	0.302160505	0.762529711	NA	protein_coding	Clip3	2.075673863	0	0.883078625	0	2.400061649	0	1.060346236	0	NA
ENSMUSG00000013928	1.29860163	0.59953904	2.946042826	0.203506559	0.838739119	NA	protein_coding	Thap8	3.113510794	0	0	2.080895725	13.03979598	0	0	8.700288089	NA
ENSMUSG00000013936	0.242745886	1.495318361	4.995051494	0.299359949	0.764665418	NA	protein_coding	Myl2	0	0.970983543	0	0	0	5.169909238	0	0	NA
ENSMUSG00000013973	25.58176868	-0.99022513	0.633239454	-1.563745156	0.117877429	NA	protein_coding	Dedd	18.68106477	15.53573669	26.49235875	41.6179145	37.00692334	30.13495885	51.47501519	83.83089642	NA
ENSMUSG00000013974	0.259459233	1.543782485	4.991667435	0.309271903	0.757114702	NA	protein_coding	Mcemp1	1.037836931	0	0	0	2.653036793	0	0	0	NA
ENSMUSG00000014030	1.00045282	-1.532100351	3.122493064	-0.490665734	0.623662886	NA	protein_coding	Pax5	1.037836931	0	0.883078625	2.080895725	3.703864447	0	3.03487138	7.163550727	NA
ENSMUSG00000014039	2.191553287	1.079452867	2.02551668	0.532927168	0.594083998	NA	protein_coding	Prdm15	2.075673863	3.883934174	1.76615725	1.040447863	2.305710949	4.224496963	1.924285978	1.175191143	NA
ENSMUSG00000014074	1.817520096	1.343983352	2.599624118	0.516991415	0.605162152	NA	protein_coding	Rnf168	5.189184657	0	0	2.080895725	5.08685361	0	0	2.083257893	NA
ENSMUSG00000014077	7.135655249	0.737746317	1.335422779	0.552444012	0.580644184	NA	protein_coding	Chp1	7.26485852	10.68081898	10.5969435	0	10.06518812	15.34077254	14.96858861	0	NA
ENSMUSG00000014158	0.220769656	-1.342306881	4.991527626	-0.268917049	0.787993517	NA	protein_coding	Trpv4	0	0	0.883078625	0	0	0	1.359534588	0	NA
ENSMUSG00000014164	1.910117825	0.091930452	2.14789924	0.04280017	0.965860829	NA	protein_coding	Klhl3	1.037836931	2.91295063	2.649235875	1.040447863	2.216981352	6.092891431	5.550703739	2.259933623	NA
ENSMUSG00000014195	43.85777274	0.201930007	0.491184003	0.41110868	0.680992846	NA	protein_coding	Dnajc7	57.08103123	36.89737465	45.03700987	36.41567519	126.3602648	81.81845759	103.531692	82.32840228	NA
ENSMUSG00000014198	4.692053116	1.609440664	1.471084472	1.094050474	0.273932842	NA	protein_coding	Zfp385c	9.340532383	4.854917717	3.5323145	1.040447863	12.93862109	6.971820202	4.988629226	1.438797191	NA
ENSMUSG00000014226	7.351038342	0.045700386	1.124236679	0.040650147	0.967574806	NA	protein_coding	Cacybp	5.189184657	9.709835434	6.181550375	8.323582901	14.26038971	26.24228791	16.35854359	22.06452779	NA
ENSMUSG00000014232	2.772443025	1.390693604	1.963829917	0.708153793	0.478849757	NA	protein_coding	Cluap1	3.113510794	4.854917717	0	3.121343588	7.775704857	11.87213051	0	7.926353026	NA
ENSMUSG00000014243	0.260111966	-1.461880636	4.983578111	-0.293339565	0.769262614	NA	protein_coding	Zswim7	0	0	0	1.040447863	0	0	0	5.570078731	NA
ENSMUSG00000014245	6.167471942	0.709430549	1.289237204	0.550271545	0.582133138	NA	protein_coding	Pigl	12.45404318	2.91295063	6.181550375	3.121343588	28.72830051	6.965954488	14.53792685	7.187933323	NA
ENSMUSG00000014294	5.312367823	-0.417372021	1.328287342	-0.314218172	0.753355342	NA	protein_coding	Ndufa2	6.227021589	2.91295063	7.947707625	4.16179145	59.8523023	27.53538616	73.56264323	38.58627566	NA
ENSMUSG00000014301	0.745603737	0.95759358	3.755317249	0.25499672	0.798725633	NA	protein_coding	Pam16	0	1.941967087	0	1.040447863	0	13.80603228	0	7.681258622	NA
ENSMUSG00000014303	9.137361908	-0.485315961	1.026086915	-0.472977439	0.636229275	NA	protein_coding	Glis2	10.37836931	4.854917717	8.83078625	12.48537435	10.96773897	5.139335432	9.691085016	13.47510497	NA
ENSMUSG00000014349	3.148053648	-0.583188984	1.681740651	-0.346777004	0.728758855	NA	protein_coding	Ube2z	3.113510794	1.941967087	4.415393125	3.121343588	4.250232102	2.607124041	5.804256584	4.110133308	NA
ENSMUSG00000014353	0.259459233	1.543782485	4.991667435	0.309271903	0.757114702	NA	protein_coding	Tmem87b	1.037836931	0	0	0	0.855955709	0	0	0	NA
ENSMUSG00000014355	15.14127703	0.189457293	0.798757191	0.237190093	0.812509322	NA	protein_coding	Anapc1	19.7189017	12.62278606	16.77849387	11.44492649	17.81262162	11.42187617	15.73921761	10.55846371	NA
ENSMUSG00000014361	5.859830867	-0.172874005	1.236586663	-0.139799345	0.888818531	NA	protein_coding	Mertk	5.189184657	5.82590126	6.181550375	6.242687175	5.573108102	6.486484761	6.768637458	6.693184695	NA
ENSMUSG00000014402	1.03979513	-1.596433333	3.32143994	-0.48064495	0.630768863	NA	protein_coding	Tsg101	1.037836931	0	0	3.121343588	2.749539853	0	0	7.97672343	NA
ENSMUSG00000014418	10.41118707	-0.673001793	0.945640295	-0.711688998	0.476657382	NA	protein_coding	Hps5	8.302695451	7.767868347	14.129258	11.44492649	7.166316431	6.565021086	11.96164005	10.04459249	NA
ENSMUSG00000014426	4.892152008	0.394554741	1.369884062	0.288020535	0.77333102	NA	protein_coding	Map3k4	7.26485852	3.883934174	5.29847175	3.121343588	5.213655785	2.792056226	3.948670205	2.287701593	NA
ENSMUSG00000014444	22.97911261	0.071821224	0.640426626	0.112145906	0.91070772	NA	protein_coding	Piezo1	22.83241249	24.27458859	22.96004425	21.84940511	17.88946086	19.71720125	18.34102782	17.09023216	NA
ENSMUSG00000014470	6.232054145	-0.300725949	1.232378215	-0.244020825	0.807214691	NA	protein_coding	Rnf166	7.26485852	3.883934174	4.415393125	9.364030763	16.15911795	8.496105734	9.457466709	20.09117707	NA
ENSMUSG00000014496	2.190900554	1.941618354	2.195676313	0.884291706	0.376538764	NA	protein_coding	Ankrd28	3.113510794	3.883934174	1.76615725	0	2.317772401	2.831063877	1.2895681	0	NA
ENSMUSG00000014498	32.61971252	1.120027621	0.551679694	2.030213606	0.042334831	NA	protein_coding	Ankrd52	45.66482498	43.69425945	20.31080837	20.80895725	26.34106499	25.24718839	12.16644751	12.25870105	NA
ENSMUSG00000014504	1.407912706	-0.920941844	2.630694503	-0.350075557	0.726281994	NA	protein_coding	Srp19	0	1.941967087	2.649235875	1.040447863	0	10.69636394	14.28802923	5.620942337	NA
ENSMUSG00000014529	1.280582817	3.857231089	3.009045295	1.281878706	0.199885199	NA	protein_coding	Tmbim7	4.151347726	0.970983543	0	0	12.64775348	2.896633476	0	0	NA
ENSMUSG00000014547	1.00045282	-1.532100351	3.122493064	-0.490665734	0.623662886	NA	protein_coding	Wdfy2	1.037836931	0	0.883078625	2.080895725	2.587444471	0	2.286263778	5.298279184	NA
ENSMUSG00000014550	3.448813389	-1.847580442	1.711256142	-1.079663293	0.280292145	NA	protein_coding	Rbsn	1.037836931	1.941967087	3.5323145	7.283135038	0.761548016	1.477263527	2.642609747	5.335184308	NA
ENSMUSG00000014554	1.484639127	2.422150948	2.691767871	0.899836488	0.368207273	NA	protein_coding	Dguok	3.113510794	1.941967087	0.883078625	0	11.53838022	7.046828978	3.209876657	0	NA
ENSMUSG00000014592	2.545187681	-1.994708644	2.146862832	-0.929127197	0.352823171	NA	protein_coding	Camta1	2.075673863	0	7.064629	1.040447863	1.027092498	0	3.630152301	0.525791265	NA
ENSMUSG00000014599	1.984192294	-1.553749879	2.177986631	-0.713388162	0.475605597	NA	protein_coding	Csf1	1.037836931	0.970983543	1.76615725	4.16179145	1.545850862	1.499333627	2.682089947	6.188447057	NA
ENSMUSG00000014601	3.511561075	-1.331247054	1.671765746	-0.796311958	0.425850737	NA	protein_coding	Strip1	2.075673863	1.941967087	7.947707625	2.080895725	2.746796713	2.527358357	10.12801274	2.656255092	NA
ENSMUSG00000014603	0.259459233	1.543782485	4.991667435	0.309271903	0.757114702	NA	protein_coding	Alx3	1.037836931	0	0	0	2.170769555	0	0	0	NA
ENSMUSG00000014606	35.71236324	0.912342537	0.525542896	1.736000133	0.082563811	NA	protein_coding	Slc25a11	46.70266191	46.60721008	25.60928012	23.93030084	109.0558177	109.0178005	62.09971687	57.06869818	NA
ENSMUSG00000014609	1.412522856	1.113836886	2.847204388	0.391203698	0.695646675	NA	protein_coding	Chrne	0	3.883934174	1.76615725	0	0	9.647397643	4.31444806	0	NA
ENSMUSG00000014668	9.383495139	-0.897873542	1.016348386	-0.883430873	0.377003516	NA	protein_coding	Chfr	8.302695451	4.854917717	15.01233662	9.364030763	10.44199459	6.004872455	18.18141182	11.36002395	NA
ENSMUSG00000014704	0.260111966	-1.461880636	4.983578111	-0.293339565	0.769262614	NA	protein_coding	Hoxa2	0	0	0	1.040447863	0	0	0	2.465871588	NA
ENSMUSG00000014747	3.846822029	1.227436265	1.627074697	0.754382246	0.450619729	NA	protein_coding	Ankrd53	2.075673863	8.738851891	3.5323145	1.040447863	5.128178146	21.6269597	9.062507871	2.625227307	NA
ENSMUSG00000014748	2.426384339	-3.126604896	2.305531427	-1.356131978	0.17505718	NA	protein_coding	Tex261	0	0.970983543	3.5323145	5.202239313	0	2.719058942	9.728002523	14.02852574	NA
ENSMUSG00000014763	2.372980634	0.728386564	2.077781253	0.350559792	0.725918626	NA	protein_coding	Fam120b	2.075673863	3.883934174	3.5323145	0	1.823717756	3.356046182	2.988634655	0	NA
ENSMUSG00000014769	7.652450815	-0.659893187	1.186244331	-0.556287747	0.578014162	NA	protein_coding	Psmb1	2.075673863	9.709835434	5.29847175	13.52582221	9.640974915	45.17631582	25.5562722	64.16055537	NA
ENSMUSG00000014771	9.398548393	0.823870469	1.003396281	0.821081845	0.411599651	NA	protein_coding	Pdcd2	10.37836931	13.59376961	5.29847175	8.323582901	35.56837206	48.29728445	18.5136048	28.47790726	NA
ENSMUSG00000014776	4.993465589	0.327936397	1.358651545	0.241369024	0.809269119	NA	protein_coding	Nol3	6.227021589	4.854917717	2.649235875	6.242687175	8.624731344	6.61309309	3.533464938	8.340437585	NA
ENSMUSG00000014778	27.02910573	0.025518526	0.604801245	0.042193243	0.966344649	NA	protein_coding	Fhod1	33.21078181	21.36163796	26.49235875	27.05164443	32.91170291	20.72827688	25.75054254	27.25883979	NA
ENSMUSG00000014782	0.441539312	-2.269171085	4.900751531	-0.463025124	0.643346359	NA	protein_coding	Plekhg4	0	0	1.76615725	0	0	0	1.677721378	0	NA
ENSMUSG00000014786	0.259459233	1.543782485	4.991667435	0.309271903	0.757114702	NA	protein_coding	Slc9a5	1.037836931	0	0	0	0.760530292	0	0	0	NA
ENSMUSG00000014791	20.20624933	0.289063795	0.747791673	0.386556584	0.699084505	NA	protein_coding	Elmo3	12.45404318	32.04245693	23.84312287	12.48537435	18.09005523	45.77337053	33.35090451	17.49375958	NA
ENSMUSG00000014837	2.148253561	-0.91476061	2.037330666	-0.448999578	0.653431961	NA	protein_coding	4931428F04Rik	1.037836931	1.941967087	3.5323145	2.080895725	1.311433593	2.402793478	4.377952535	2.673683175	NA
ENSMUSG00000014846	0.220769656	-1.342306881	4.991527626	-0.268917049	0.787993517	NA	protein_coding	Tppp3	0	0	0.883078625	0	0	0	3.535198619	0	NA
ENSMUSG00000014850	1.994065326	0.668748115	2.472509549	0.270473421	0.786796062	NA	protein_coding	Msh3	0	4.854917717	0	3.121343588	0	14.41709984	0	8.925911231	NA
ENSMUSG00000014852	2.214834982	0.300246129	2.190845026	0.137045809	0.890994586	NA	protein_coding	Adamts13	0	4.854917717	0.883078625	3.121343588	0	4.829541548	0.860163088	3.045510572	NA
ENSMUSG00000014856	13.9349185	0.94481243	0.854028139	1.106301288	0.268596134	NA	protein_coding	Tmem208	11.41620625	25.24557213	9.713864875	9.364030763	71.14109587	154.0427838	59.37249562	59.33405346	NA
ENSMUSG00000014859	13.25713449	-1.203907275	0.855294456	-1.407593918	0.159251349	NA	protein_coding	E2f4	8.302695451	7.767868347	20.31080837	16.6471658	16.34903249	15.32187484	41.5322255	33.47771883	NA
ENSMUSG00000014867	15.9209602	0.134257268	0.777855779	0.172599177	0.862966498	NA	protein_coding	Surf4	20.75673863	12.62278606	16.77849387	13.52582221	28.8148837	18.16606721	23.74740869	18.74495162	NA
ENSMUSG00000014873	14.20736461	-0.450079555	0.816115031	-0.551490339	0.581297588	NA	protein_coding	Surf2	10.37836931	13.59376961	14.129258	18.72806153	35.29751161	45.46868894	46.27530378	61.44122355	NA
ENSMUSG00000014905	0.260111966	-1.461880636	4.983578111	-0.293339565	0.769262614	NA	protein_coding	Dnajb9	0	0	0	1.040447863	0	0	0	2.216380298	NA
ENSMUSG00000014956	7.175798577	-0.238685627	1.13769138	-0.209798221	0.833825162	NA	protein_coding	Ppp1cb	8.302695451	4.854917717	6.181550375	9.364030763	10.72302569	6.280832584	8.290499491	12.35104414	NA
ENSMUSG00000014959	16.66237557	0.870667761	0.761917438	1.142732424	0.253149703	NA	protein_coding	Gorasp2	21.79457556	21.36163796	14.129258	9.364030763	48.70847807	49.49241376	32.19444911	20.89208917	NA
ENSMUSG00000014980	0.744951005	3.080623449	3.677026233	0.837802957	0.402141378	NA	protein_coding	Tsen15	1.037836931	1.941967087	0	0	3.841682659	7.069550306	0	0	NA
ENSMUSG00000015001	0.761664352	3.108943136	3.647427028	0.852366096	0.394010932	NA	protein_coding	Oc90	2.075673863	0.970983543	0	0	4.61666364	2.114649446	0	0	NA
ENSMUSG00000015002	2.859926156	-2.175796713	4.163273555	-0.522616802	0.601240945	NA	protein_coding	Efr3a	2.075673863	0	0	9.364030763	2.062708585	0	0	9.503513478	NA
ENSMUSG00000015013	0.220769656	-1.342306881	4.991527626	-0.268917049	0.787993517	NA	protein_coding	Trappc2l	0	0	0.883078625	0	0	0	5.948146121	0	NA
ENSMUSG00000015016	0.502857851	-0.02547562	4.438514814	-0.005739672	0.995420429	NA	protein_coding	Acsf3	0	0.970983543	0	1.040447863	0	1.773574464	0	1.864027786	NA
ENSMUSG00000015023	7.041058301	-0.208965984	1.137776237	-0.183661758	0.854278811	NA	protein_coding	Ddx19a	7.26485852	5.82590126	8.83078625	6.242687175	11.15799406	8.761520488	13.30309949	9.749289789	NA
ENSMUSG00000015027	1.801459481	0.410125925	2.378999228	0.172394308	0.863127547	NA	protein_coding	Galns	3.113510794	0.970983543	0	3.121343588	5.012901873	1.565985737	0	5.132429688	NA
ENSMUSG00000015053	0.762317084	1.004601827	3.464905407	0.289936292	0.771864976	NA	protein_coding	Gata2	1.037836931	0.970983543	0	1.040447863	1.312140208	1.272655717	0	1.31321048	NA
ENSMUSG00000015083	3.980909571	1.599609711	1.588254464	1.007149514	0.31386293	NA	protein_coding	C8g	4.151347726	7.767868347	0.883078625	3.121343588	19.28690652	35.49219652	3.950824972	13.98836963	NA
ENSMUSG00000015087	6.221380095	0.133489236	1.264973153	0.105527327	0.915957387	NA	protein_coding	Rabl6	7.26485852	5.82590126	9.713864875	2.080895725	8.971463824	7.044605302	11.76583378	2.612936824	NA
ENSMUSG00000015090	0.502857851	-0.02547562	4.438514814	-0.005739672	0.995420429	NA	protein_coding	Ptgds	0	0.970983543	0	1.040447863	0	4.589958196	0	5.014442799	NA
ENSMUSG00000015092	2.745856645	-0.222184339	1.800140542	-0.123426107	0.901769685	NA	protein_coding	Edf1	3.113510794	1.941967087	1.76615725	4.16179145	17.75776079	11.48226673	10.27005318	23.69632699	NA
[truncated: 15,578 more rows]
