# Supplementary material for: RNA m6A demethylase ALKBH5 regulates the development of γδ T cells
Source: Research Square preprint supplement (doi:10.21203/rs.3.rs-79739/v1), 2020-12-01
Supplement: Supplementary file 7 [file 79aed2b8961ed4f93705e8c1.xlsx]

## Sheet: Sheet1
Cell cycle-related genes
Gene_name	Positive regulator	Negitive regulator	Base-mean	log2 Fold Change (WT vs KO)	P-value
Tifa	Yes		147.339	-1.1134	0.00492685
Pex26	Yes		276.049	-0.868893	0.00209962
Mcm8	Yes		389.354	-0.844901	0.00185811
Rad51c	Yes		287.992	-0.700715	0.0133746
Ercc6l	Yes		1137.41	-0.578009	0.00195555
Bub1	Yes		1612.63	-0.575653	0.000491611
Mcm10	Yes		1124.7	-0.552227	0.000653814
Bub1b	Yes		3150.9	-0.511599	0.00123594
Espl1	Yes		654.083	-0.507809	0.00862255
Nsl1	Yes		665.17	-0.500808	0.0103524
Cenpi	Yes		559.506	-0.488549	0.0216519
Znfx1	Yes		1464.73	-0.476036	0.0150251
Ncapg	Yes		1518.33	-0.457222	0.00791256
Nup188	Yes		3146.14	-0.456209	0.010661
Mis18bp1	Yes		1296.98	-0.436602	0.00613091
Nup133	Yes		1201.75	-0.431704	0.0154542
Nup214	Yes		2061.99	-0.424319	0.00202325
Ctc1	Yes		1416.44	-0.413488	0.0149102
Exo1	Yes		958.649	-0.41027	0.0159622
Ncapg2	Yes		2361.35	-0.405121	0.0151069
Uhrf1	Yes		6663.57	-0.396714	0.0023994
Sgo1	Yes		1281.27	-0.394766	0.0194337
Ccne2	Yes		1639.31	-0.38658	0.00961667
Pola1	Yes		2590.97	-0.376793	0.0258647
Rad51	Yes		2126.94	-0.37471	0.00507974
Wrn	Yes		1897.7	-0.374012	0.0177816
Mast3	Yes		1640.98	-0.373263	0.00898499
Kif2c	Yes		2447.71	-0.364297	0.0220552
Nup210	Yes		7297.76	-0.360623	0.0127074
Cdc45	Yes		1438.72	-0.354314	0.0250465
Mcm2	Yes		11615.5	-0.35402	0.006018
Ccna2	Yes		2871.6	-0.350372	0.01169
Cc2d1b	Yes		1616.83	-0.34945	0.0166029
Dync1li2	Yes		1506.62	-0.343554	0.0210791
Stag2	Yes		5158.01	-0.342403	0.0112486
E2f2	Yes		2707.96	-0.34149	0.00596814
Ncapd2	Yes		5110.41	-0.332976	0.0222013
Mre11a	Yes		1851.74	-0.33242	0.0204787
Top2a	Yes		2871.6	-0.324647	0.01169
Cdc6	Yes		2900.88	-0.323801	0.0117302
Mcm3	Yes		13619.5	-0.322027	0.00366069
Mcm5	Yes		10919.4	-0.317919	0.00539032
Nup37	Yes		1480.07	-0.311713	0.0372365
Cdk6	Yes		6779.45	-0.307468	0.00436417
Igf2bp3	Yes		1491.06	-0.301798	0.0431569
Tubgcp5	Yes		1388.19	-0.296867	0.048036
Rrm2	Yes		17555.8	-0.277255	0.0160144
Ccnb2	Yes		7993.59	-0.269961	0.0154786
Smc2	Yes		5345.82	-0.268902	0.0169789
Ncaph	Yes		3347.01	-0.267732	0.0322931
Xpo1	Yes		3317.27	-0.266886	0.038141
Spc24	Yes		2733.03	-0.264121	0.0362662
Haus4	Yes		2388.06	-0.262322	0.0418684
Cdk1	Yes		2936.28	-0.247148	0.0448191
Fen1		Yes	9768.14	-0.235057	0.0493308
Smc1a	Yes		8366.79	-0.227532	0.0345219
Mcm7	Yes		10142.4	-0.215038	0.0344533
