# Supplementary material for: RNA m6A demethylase ALKBH5 regulates the development of γδ T cells
Source: Research Square preprint supplement (doi:10.21203/rs.3.rs-79739/v1), 2020-12-01
Supplement: Supplementary file 8 [file 80c5dbf51aae394aff1f42f3.xlsx]

## Sheet: Sheet1
Antibodies or reagents	Supplier	Conjugated	Catalog number	Clone number
Annexin V	Biolegend	APC	640941
BrdU	Biolegend	PERCP-CY5.5	364110	3D4
CD3	Biolegend	APC-CY7	100222	17A2
CD3	Biolegend	APC	100236	17A2
CD3	Biolegend	PERCP-CY5.5	100218	17A2
CD3	Biolegend	FITC	100204	17A2
CD4	Biolegend	BV605	100451	GK1.5
CD4	Biolegend	BV711	100447	GK1.5
CD4	Biolegend	PE	100408	GK1.5
CD8α	Biolegend	BV605	100744	53-6.7
CD8α	Biolegend	BV711	100759	53-6.7
CD8α	Biolegend	APC	100712	53-6.7
CD8β	eBioscience	FITC	50-112-8937	H35-17.2
CD24	Biolegend	AF700	101836	M1/69
CD25	Biolegend	PE	102008	PC61
CD25	Biolegend	PERCP-CY5.5	101912	3C7
CD44	Biolegend	APC-CY7	103028	IM7
CD44	Biolegend	APC	103012	IM7
CD44	Biolegend	BV421	103040	IM7
CD45.2	Biolegend	BV510	109838	104
CD45.2	Biolegend	FITC	109806	104
CD62L	Biolegend	BV421	104435	MEL-14
CD73	Biolegend	PE-CY7	127224	TY/11.8
CD339 (Jagged1)	Biolegend	PE	130907	HMJ1-29
NK1.1	Biolegend	BV421	108741	PK136
NK1.1	Biolegend	PERCP-CY5.5	108728	PK136
Notch2	Biolegend	APC	130713	HMN2-35
TCRβ	Biolegend	APC	109212	H57-597
TCRβ	Biolegend	FITC	109206	H57-597
TCRγ/δ	Biolegend	PE-CY7	118124	GL3
TCRγ/δ	Biolegend	FITC	118106	GL3
TCRvγ1.1	Biolegend	APC	141108	2.11
TCRvγ2	Biolegend	PE	137706	UC3-10A6
IL-17A	Biolegend	BV421	512322	BL168
IL-17A	Biolegend	PE	506904	TC11-18H10.1
IFN-γ	Biolegend	BV421	505830	XMG1.2
IFN-γ	Biolegend	PE	505808	XMG1.2
KI67	BD Biosciences	BV421	BDB562899	B56
Ki67	Biolegend	APC	652406	16A8
7AAD	Thermo Fisher	PERCP-CY5.5	A1310
BD Cytoperm™ Permeabilization Buffer Plus	BD Biosciences		561651
BD Cytofix/Cytoperm	BD Biosciences		554714
Fixation/Permeabilization Concentrate and Diluent	eBioscience		00-5521-00
FACS staining buffer:	1×DPBS; 2%FBS
