# Supplementary material for: RNA m6A demethylase ALKBH5 regulates the development of γδ T cells
Source: Research Square preprint supplement (doi:10.21203/rs.3.rs-79739/v1), 2020-12-01
Supplement: Supplementary file 9 [file b9a66e42778ef24db04f8956.xlsx]

## Sheet: Sheet 1
gene_name	WT1	WT2	WT3	KO1	KO2	KO3	baseMean	log2FoldChange (WT vs KO)	lfcSE	stat	pvalue	padj
Jagged1	1255	663	1305	326	225	358	699.067	1.82623	0.195396	9.3463	9.0769e-21	1.25425e-16
Jagged2	293	378	298	255	334	393	321.737	0.02689	0.269297	0.0998523	0.920462	0.999576
Notch1	1991	1570	2222	2247	2115	1996	2027.4	-0.116296	0.155443	-0.748158	0.454365	0.999576
Notch2	1532	1392	1240	985	1230	1055	1235	0.383108	0.15859	2.41572	0.0157043	0.663616
Notch3	15	15	57	43	25	30	31.2067	-0.405672	0.840067	-0.482904	0.629164	0.999576
Notch4	16	9	13	6	1	6	8.67167	1.82855	1.46691	1.24653	0.21257	0.999576
Hey1	753	241	1165	183	57	264	453.648	2.12019	0.236386	8.96921	2.98644e-19	1.37556e-15
Hes1	84	43	100	50	24	63	61.5129	0.782513	0.562163	1.39197	0.163931	0.999576
Fabp7	419	138	128	145	53	97	167.684	1.14036	0.378959	3.00919	0.00261949	0.28059
Gzmb	1163	1091	2350	953	801	1960	1385.8	0.364819	0.153431	2.37774	0.0174193	0.681869
Cdkn1a	85	61	156	103	157	344	141.077	-0.676756	0.435947	-1.55238	0.120572	0.999576
